# Supplementary material for: A foundation model for efficient and assumption-free characterization of brain microstructure from diffusion MRI
Source: Research Square preprint supplement (doi:10.21203/rs.3.rs-8877816/v1), 2026-02-23
Supplement: Supplementary file 1 [file 4e8c8bde8d334af87d3e5863.xlsx]

## Sheet: Table 1-UKB count
Category	Name	SSDiff	DTI+NODDI	SC	DTI+NODDI+SC	BigFLICA
Diet by 24-hour recall	Food weight	0.126095	0.106975	0.0600798	0.111147	0.111096
Diet by 24-hour recall	Energy	0.207143	0.166094	0.16481	0.195406	0.203027
Diet by 24-hour recall	Protein	0.132136	0.0989446	0.0942861	0.109703	0.129335
Diet by 24-hour recall	Fat	0.156011	0.107152	0.127483	0.139783	0.158492
Diet by 24-hour recall	Carbohydrate	0.168882	0.11682	0.107996	0.13357	0.145487
Diet by 24-hour recall	Saturated fat	0.147404	0.101753	0.125899	0.136711	0.147108
Diet by 24-hour recall	Polyunsaturated fat	0.0854581	0.0410867	0.0286268	0.0719939	0.0748438
Diet by 24-hour recall	Total sugars	0.102945	0.0782489	0.0436944	0.0682726	0.0906306
Diet by 24-hour recall	Englyst dietary fibre	0.0740976	0.0223111	0.0054919	0.0418357	0.0422222
Diet by 24-hour recall	Iron	0.144622	0.0987725	0.0979492	0.116826	0.133317
Diet by 24-hour recall	Vitamin B6	0.113276	0.0679884	0.0337064	0.0745603	0.0805589
Diet by 24-hour recall	Vitamin B12	0.0381133	0.0279071	-0.00129709	0.0262654	0.0483515
Diet by 24-hour recall	Folate	0.119996	0.0834049	0.0428519	0.105812	0.0924615
Diet by 24-hour recall	Vitamin C	0.0462664	0.0466704	0.0115269	0.0265751	0.0476253
Diet by 24-hour recall	Potassium	0.0912409	0.0621716	0.0214376	0.0601563	0.0640526
Diet by 24-hour recall	Magnesium	0.160429	0.105055	0.0862906	0.11883	0.140246
Diet by 24-hour recall	Retinol	0.108498	0.0850953	0.0581532	0.0969679	0.0912601
Diet by 24-hour recall	Carotene	0.0257283	0.0335875	0.00387937	0.0281114	0.0389189
Diet by 24-hour recall	Vitamin D	0.0333382	-0.00412939	0.00698473	0.0126472	0.0251339
Diet by 24-hour recall	Starch	0.224182	0.134965	0.15769	0.17726	0.211132
Diet by 24-hour recall	Calcium	0.104906	0.064637	0.0301682	0.0669811	0.0862827
Diet by 24-hour recall	Vitamin E	0.0139963	-0.0366508	-0.0143877	-0.00450747	-0.0161458
Cognitive function	Number of words beginning with 'S' (pilot)	0	0	0	0	0
Experience of pain	Days per month having headaches when they were at their worst	0.064523	-0.00371672	-0.00944075	0.0119831	0.0609044
Experience of pain	Scale to indicate how health is today	0.144105	0.105003	0.100822	0.120144	0.130824
Verbal interview	Place of birth in UK - north co-ordinate	0.304737	0.342035	0.314212	0.388132	0.356276
Verbal interview	Place of birth in UK - east co-ordinate	0.1434	0.135532	0.147063	0.15927	0.151812
Lifestyle and environment	Bread intake	0.273498	0.202668	0.246013	0.250539	0.266798
Lifestyle and environment	Tea intake	0.0431726	0.0616135	0.0582127	0.0694866	0.0632567
Family history	Father's age at death	0.126844	0.108852	0.108454	0.105972	0.123536
Family history	Mother's age	0.56553	0.490987	0.537831	0.532318	0.584812
Physical measures	Sitting height	0.652486	0.516461	0.621824	0.629346	0.636357
Physical measures	Speech-reception-threshold (SRT) estimate (left)	0.149252	0.124092	0.127365	0.131729	0.151209
Physical measures	Speech-reception-threshold (SRT) estimate (right)	0.151889	0.130168	0.133672	0.146994	0.15318
Verbal interview	Birth weight	0.351019	0.245187	0.314718	0.311912	0.341803
Cognitive function	Mean time to correctly identify matches	0.236188	0.211674	0.221394	0.21743	0.239664
Verbal interview	Cascot confidence score	-0.020692	0.00167657	-0.045915	-0.0908146	0.0314175
Physical measures	Forced expiratory volume in 1-second (FEV1), Best measure	0.654827	0.46608	0.603414	0.569084	0.64201
Physical measures	Forced vital capacity (FVC), Best measure	0.68194	0.492422	0.629095	0.604544	0.663854
Physical measures	Forced expiratory volume in 1-second (FEV1), predicted	0.826246	0.590086	0.76212	0.738832	0.813381
Physical measures	Forced expiratory volume in 1-second (FEV1), predicted percentage	0.146682	0.0981416	0.0941199	0.111397	0.116645
Lifestyle and environment	Pack years of smoking	0.286674	0.258152	0.221607	0.27499	0.254083
Lifestyle and environment	Pack years adult smoking as proportion of life span exposed to smoking	0.225385	0.20358	0.150125	0.217599	0.154406
Physical measures	Forced expiratory volume in 1-second (FEV1) Z-score	0.143908	0.0883928	0.0999626	0.111351	0.109793
Physical measures	Forced vital capacity (FVC) Z-score	0.185957	0.0994315	0.121336	0.138849	0.13058
Physical measures	FEV1/ FVC ratio Z-score	0.112267	0.0841589	0.0964246	0.103178	0.104138
Eye measures	avMSE	0.136633	0.0798249	0.0965099	0.098642	0.114487
NMR metabolomics	Glucose-lactate	0.15313	0.132692	0.122533	0.131091	0.150561
NMR metabolomics	Spectrometer-corrected alanine	0.133722	0.107662	0.12087	0.117856	0.117652
Mental health	Age when known person last commented about drinking habits	0.430446	0.373306	0.327816	0.38615	0.418253
Physical measures	Body mass index (BMI)	0.531298	0.396895	0.366312	0.446485	0.410134
Physical measures	Weight	0.644061	0.522056	0.541993	0.589141	0.564335
Physical measures	Pulse wave Arterial Stiffness index	0.257102	0.234547	0.233514	0.249828	0.242118
Lifestyle and environment	Age first had sexual intercourse	0.223071	0.165495	0.194261	0.187206	0.205581
Lifestyle and environment	Summed days activity	0.13962	0.0778258	0.0963338	0.0960802	0.10027
Lifestyle and environment	Summed minutes activity	0.0980835	0.0530565	0.0725976	0.0725899	0.070936
Lifestyle and environment	MET minutes per week for walking	0.0750952	0.054743	0.0472007	0.0580579	0.0749192
Lifestyle and environment	MET minutes per week for moderate activity	0.10713	0.0833728	0.0944352	0.0926227	0.0955031
Lifestyle and environment	Summed MET minutes per week for all activity	0.110261	0.0579055	0.0743068	0.0759539	0.0885928
Work environment	Age hayfever or allergic rhinitis diagnosed by doctor	0.198418	0.155885	0.159602	0.17561	0.188667
Work environment	Age asthma diagnosed by doctor	0.250645	0.162073	0.158942	0.195856	0.221886
Work environment	Age chronic bronchitis diagnosed by doctor	0	0	0	0	0
Work environment	Age COPD (Chronic Obstructive Pulmonary Disease) diagnosed by doctor	0	0	0	0	0
Work environment	Age bronchiectasis diagnosed by doctor	0	0	0	0	0
Health and medical history	Age started wearing glasses or contact lenses	0.148948	0.0967872	0.128317	0.120286	0.127112
Work environment	Year ended full time education	0.719514	0.653423	0.691276	0.68821	0.737962
Work environment	Years of cough on most days	0.058379	0.00790809	0.0127966	0.00573968	0.0300508
Work environment	Years of bringing up phlegm/sputum/mucus on most days	0.067357	-0.0294441	0.0403518	0.0569167	0.0542711
Work environment	Age of stopping smoking	0.225807	0.208046	0.183472	0.226681	0.200352
Work environment	Amount of tobacco currently smoked	0	0	0	0	0
Infectious Diseases	1gG antigen for Herpes Simplex virus-1	0	0	0	0	0
Infectious Diseases	2mgG unique antigen for Herpes Simplex virus-2	0	0	0	0	0
Infectious Diseases	gE / gI antigen for Varicella Zoster Virus	0	0	0	0	0
Infectious Diseases	VCA p18 antigen for Epstein-Barr Virus	0	0	0	0	0
Infectious Diseases	EBNA-1 antigen for Epstein-Barr Virus	0	0	0	0	0
Infectious Diseases	ZEBRA antigen for Epstein-Barr Virus	0	0	0	0	0
Infectious Diseases	EA-D antigen for Epstein-Barr Virus	0	0	0	0	0
Infectious Diseases	pp150 Nter antigen for Human Cytomegalovirus	0	0	0	0	0
Infectious Diseases	pp 52 antigen for Human Cytomegalovirus	0	0	0	0	0
Infectious Diseases	pp 28 antigen for Human Cytomegalovirus	0	0	0	0	0
Infectious Diseases	IE1A antigen for Human Herpesvirus-6	0	0	0	0	0
Infectious Diseases	IE1B antigen for Human Herpesvirus-6	0	0	0	0	0
Infectious Diseases	p101 k antigen for Human Herpesvirus-6	0	0	0	0	0
Infectious Diseases	U14 antigen for Human Herpesvirus-7	0	0	0	0	0
Infectious Diseases	LANA antigen for Kaposi's Sarcoma-Associated Herpesvirus	0	0	0	0	0
Infectious Diseases	K8.1 antigen for Kaposi's Sarcoma-Associated Herpesvirus	0	0	0	0	0
Infectious Diseases	HBe antigen for Hepatitis B Virus	0	0	0	0	0
Infectious Diseases	NS3 antigen for Hepatitis C Virus	0	0	0	0	0
Infectious Diseases	p22 antigen for Toxoplasma gondii	0	0	0	0	0
Infectious Diseases	sag1 antigen for Toxoplasma gondii	0	0	0	0	0
Infectious Diseases	HTLV-1 gag antigen for Human T-Lymphotropic Virus 1	0	0	0	0	0
Infectious Diseases	HTLV-1 env antigen for Human T-Lymphotropic Virus 1	0	0	0	0	0
Infectious Diseases	HIV-1 gag antigen for Human Immunodeficiency Virus	0	0	0	0	0
Infectious Diseases	HIV-1 env antigen for Human Immunodeficiency Virus	0	0	0	0	0
Infectious Diseases	BK VP1 antigen for Human Polyomavirus BKV	0	0	0	0	0
Infectious Diseases	JC VP1 antigen for Human Polyomavirus JCV	0	0	0	0	0
Infectious Diseases	MC VP1 antigen for Merkel Cell Polyomavirus	0	0	0	0	0
Infectious Diseases	L1 antigen for Human Papillomavirus type-16	0	0	0	0	0
Infectious Diseases	E7 antigen for Human Papillomavirus type-16	0	0	0	0	0
Infectious Diseases	L1 antigen for Human Papillomavirus type-18	0	0	0	0	0
Infectious Diseases	momp D antigen for Chlamydia trachomatis	0	0	0	0	0
Infectious Diseases	momp A antigen for Chlamydia trachomatis	0	0	0	0	0
Infectious Diseases	tarp-D F2 antigen for Chlamydia trachomatis	0	0	0	0	0
Infectious Diseases	PorB antigen for Chlamydia trachomatis	0	0	0	0	0
Infectious Diseases	CagA antigen for Helicobacter pylori	0	0	0	0	0
Infectious Diseases	VacA antigen for Helicobacter pylori	0	0	0	0	0
Infectious Diseases	OMP antigen for Helicobacter pylori	0	0	0	0	0
Infectious Diseases	GroEL antigen for Helicobacter pylori	0	0	0	0	0
Infectious Diseases	Catalase antigen for Helicobacter pylori	0	0	0	0	0
Infectious Diseases	UreA antigen for Helicobacter pylori	0	0	0	0	0
Physical measures	Weight	0.644316	0.523737	0.542936	0.591132	0.564449
Physical measures	Body fat percentage	0.718491	0.473954	0.59936	0.579404	0.674983
Physical measures	Whole body fat mass	0.556571	0.346063	0.380749	0.410689	0.478544
Physical measures	Whole body fat-free mass	0.807394	0.644069	0.742527	0.741577	0.772044
Physical measures	Whole body water mass	0.805651	0.639061	0.74164	0.739313	0.769658
Physical measures	Body mass index (BMI)	0.531618	0.397405	0.36887	0.443656	0.410156
Physical measures	Basal metabolic rate	0.780308	0.630595	0.715831	0.719356	0.740065
Physical measures	Impedance of whole body	0.665613	0.518954	0.593804	0.601052	0.637623
Physical measures	Impedance of leg (right)	0.49607	0.393036	0.43189	0.449147	0.462466
Physical measures	Impedance of leg (left)	0.486855	0.388187	0.422881	0.440544	0.452863
Physical measures	Impedance of arm (right)	0.700159	0.534217	0.629838	0.629687	0.673952
Physical measures	Impedance of arm (left)	0.702016	0.533782	0.628242	0.629774	0.676343
Physical measures	Leg fat percentage (right)	0.810232	0.551626	0.721824	0.692606	0.783369
Physical measures	Leg fat mass (right)	0.6662	0.425091	0.539102	0.528969	0.618825
Physical measures	Leg fat-free mass (right)	0.783263	0.622638	0.718501	0.716477	0.744106
Physical measures	Leg predicted mass (right)	0.787241	0.626635	0.72238	0.722368	0.748345
Physical measures	Leg fat percentage (left)	0.816066	0.557998	0.728481	0.694767	0.788002
Physical measures	Leg fat mass (left)	0.669271	0.42942	0.54312	0.53243	0.624025
Physical measures	Leg fat-free mass (left)	0.780997	0.624484	0.716429	0.718973	0.741912
Physical measures	Leg predicted mass (left)	0.784787	0.62982	0.720554	0.72066	0.745831
Physical measures	Arm fat percentage (right)	0.713456	0.480129	0.605183	0.585384	0.680879
Physical measures	Arm fat mass (right)	0.517629	0.327091	0.357141	0.386314	0.453012
Physical measures	Arm fat-free mass (right)	0.807242	0.639832	0.741095	0.739995	0.770274
Physical measures	Arm predicted mass (right)	0.809767	0.636551	0.743695	0.739288	0.773152
Physical measures	Arm fat percentage (left)	0.71816	0.482692	0.607785	0.588331	0.682033
Physical measures	Arm fat mass (left)	0.514602	0.320789	0.353107	0.375648	0.445292
Physical measures	Arm fat-free mass (left)	0.798111	0.633378	0.732745	0.730813	0.759196
Physical measures	Arm predicted mass (left)	0.780694	0.613936	0.720579	0.711307	0.741203
Physical measures	Trunk fat percentage	0.589185	0.362792	0.446512	0.445893	0.529986
Physical measures	Trunk fat mass	0.514705	0.348599	0.35144	0.405354	0.381022
Physical measures	Trunk fat-free mass	0.807702	0.637328	0.745184	0.736919	0.774371
Physical measures	Trunk predicted mass	0.810095	0.632999	0.746459	0.737917	0.777206
NMR metabolomics	Total Cholesterol	0.1981	0.149993	0.160085	0.17198	0.214706
NMR metabolomics	Total Cholesterol Minus HDL-C	0.128589	0.0749748	0.0798783	0.101097	0.117061
NMR metabolomics	Remnant Cholesterol (Non-HDL, Non-LDL -Cholesterol)	0.138585	0.0773225	0.0860263	0.105591	0.119843
NMR metabolomics	VLDL Cholesterol	0.194992	0.139605	0.136688	0.158976	0.15689
NMR metabolomics	Clinical LDL Cholesterol	0.117792	0.0685493	0.0719243	0.0923478	0.120638
NMR metabolomics	LDL Cholesterol	0.118885	0.0695829	0.0754123	0.0930963	0.114868
NMR metabolomics	HDL Cholesterol	0.428875	0.343442	0.375778	0.389708	0.403712
NMR metabolomics	Total Triglycerides	0.303694	0.23502	0.246	0.266943	0.267284
NMR metabolomics	Triglycerides in VLDL	0.323758	0.248245	0.260629	0.285403	0.28052
NMR metabolomics	Triglycerides in LDL	0.241383	0.198679	0.191794	0.207966	0.2126
NMR metabolomics	Triglycerides in HDL	0.191845	0.154123	0.143468	0.15621	0.17149
NMR metabolomics	Total Phospholipids in Lipoprotein Particles	0.254785	0.187244	0.21277	0.222433	0.258956
NMR metabolomics	Phospholipids in VLDL	0.266995	0.201424	0.202416	0.22257	0.223863
NMR metabolomics	Phospholipids in LDL	0.120438	0.0670954	0.0794582	0.0970324	0.104323
NMR metabolomics	Phospholipids in HDL	0.395082	0.303592	0.347179	0.356349	0.385265
NMR metabolomics	Total Esterified Cholesterol	0.209204	0.16252	0.175301	0.186492	0.222231
NMR metabolomics	Cholesteryl Esters in VLDL	0.162075	0.105865	0.104578	0.126122	0.122536
NMR metabolomics	Cholesteryl Esters in LDL	0.122832	0.07084	0.0841139	0.099323	0.10313
NMR metabolomics	Cholesteryl Esters in HDL	0.427989	0.341732	0.372882	0.387699	0.396276
NMR metabolomics	Total Free Cholesterol	0.169767	0.121146	0.126589	0.143205	0.174928
NMR metabolomics	Free Cholesterol in VLDL	0.24592	0.182288	0.181309	0.203731	0.202532
NMR metabolomics	Free Cholesterol in LDL	0.123314	0.0825114	0.0822732	0.0966201	0.132186
NMR metabolomics	Free Cholesterol in HDL	0.426483	0.329475	0.371238	0.386036	0.40814
NMR metabolomics	Total Lipids in Lipoprotein Particles	0.166286	0.101679	0.113095	0.131797	0.153019
NMR metabolomics	Total Lipids in VLDL	0.292205	0.22273	0.225948	0.251009	0.248647
NMR metabolomics	Total Lipids in LDL	0.122843	0.0684988	0.0796109	0.0970093	0.104572
NMR metabolomics	Total Lipids in HDL	0.408784	0.31821	0.358176	0.371115	0.396233
NMR metabolomics	Total Concentration of Lipoprotein Particles	0.296703	0.23565	0.256772	0.26843	0.300637
NMR metabolomics	Concentration of VLDL Particles	0.223178	0.164662	0.164836	0.186116	0.183141
NMR metabolomics	Concentration of LDL Particles	0.133036	0.0790928	0.0835689	0.110562	0.100906
NMR metabolomics	Concentration of HDL Particles	0.308704	0.241529	0.268693	0.282346	0.31123
NMR metabolomics	Average Diameter for VLDL Particles	0.400296	0.314095	0.338746	0.358253	0.361671
NMR metabolomics	Average Diameter for LDL Particles	0.229845	0.195663	0.195126	0.210863	0.221602
NMR metabolomics	Average Diameter for HDL Particles	0.467139	0.360762	0.402417	0.413363	0.424543
NMR metabolomics	Phosphoglycerides	0.274329	0.203936	0.234569	0.24146	0.279287
NMR metabolomics	Triglycerides to Phosphoglycerides ratio	0.398169	0.324405	0.347622	0.367071	0.360104
NMR metabolomics	Total Cholines	0.287735	0.220175	0.248415	0.256048	0.292545
NMR metabolomics	Phosphatidylcholines	0.293558	0.224159	0.255067	0.262498	0.294474
NMR metabolomics	Sphingomyelins	0.291236	0.225996	0.252625	0.263486	0.298093
NMR metabolomics	Apolipoprotein B	0.132876	0.0742778	0.0835425	0.110943	0.103117
NMR metabolomics	Apolipoprotein A1	0.369917	0.288162	0.325794	0.338415	0.364408
NMR metabolomics	Apolipoprotein B to Apolipoprotein A1 ratio	0.256358	0.196257	0.217561	0.228733	0.225658
NMR metabolomics	Total Fatty Acids	0.203757	0.151046	0.144388	0.157208	0.176959
NMR metabolomics	Degree of Unsaturation	0.286998	0.221097	0.224845	0.249841	0.25064
NMR metabolomics	Omega-3 Fatty Acids	0.196714	0.167675	0.175607	0.177244	0.19372
NMR metabolomics	Omega-6 Fatty Acids	0.17413	0.116727	0.126354	0.138128	0.172938
NMR metabolomics	Polyunsaturated Fatty Acids	0.194765	0.126602	0.147294	0.157385	0.186017
NMR metabolomics	Monounsaturated Fatty Acids	0.252764	0.188936	0.185139	0.206649	0.205492
NMR metabolomics	Saturated Fatty Acids	0.211399	0.158873	0.153418	0.167792	0.181509
NMR metabolomics	Linoleic Acid	0.1374	0.078544	0.0938876	0.100791	0.146993
NMR metabolomics	Docosahexaenoic Acid	0.223326	0.169273	0.193736	0.203365	0.216412
NMR metabolomics	Omega-3 Fatty Acids to Total Fatty Acids percentage	0.171478	0.144403	0.159434	0.164426	0.167011
NMR metabolomics	Omega-6 Fatty Acids to Total Fatty Acids percentage	0.323808	0.268753	0.26234	0.282665	0.289881
NMR metabolomics	Polyunsaturated Fatty Acids to Total Fatty Acids percentage	0.327201	0.258545	0.25218	0.278587	0.275198
NMR metabolomics	Monounsaturated Fatty Acids to Total Fatty Acids percentage	0.351919	0.269469	0.279701	0.307381	0.297915
NMR metabolomics	Saturated Fatty Acids to Total Fatty Acids percentage	0.155055	0.120491	0.112472	0.124316	0.128153
NMR metabolomics	Linoleic Acid to Total Fatty Acids percentage	0.310835	0.257724	0.249409	0.270948	0.278576
NMR metabolomics	Docosahexaenoic Acid to Total Fatty Acids percentage	0.226027	0.165875	0.169373	0.189067	0.181607
NMR metabolomics	Polyunsaturated Fatty Acids to Monounsaturated Fatty Acids ratio	0.352145	0.270787	0.277071	0.306604	0.295382
NMR metabolomics	Omega-6 Fatty Acids to Omega-3 Fatty Acids ratio	0.153728	0.13447	0.133009	0.142844	0.149612
NMR metabolomics	Alanine	0.10906	0.0830716	0.0862511	0.0972834	0.0921129
NMR metabolomics	Glutamine	0.145909	0.103478	0.113984	0.128526	0.117392
NMR metabolomics	Glycine	0.323108	0.255545	0.26964	0.285737	0.30738
NMR metabolomics	Histidine	0.0875211	0.0560138	0.0461616	0.067107	0.0766563
NMR metabolomics	Total Concentration of Branched-Chain Amino Acids (Leucine + Isoleucine + Valine)	0.262951	0.210633	0.21706	0.227134	0.233982
NMR metabolomics	Isoleucine	0.195871	0.156889	0.161421	0.1771	0.169381
NMR metabolomics	Leucine	0.269193	0.20677	0.224111	0.232461	0.249825
NMR metabolomics	Valine	0.26652	0.217361	0.220419	0.231249	0.232853
NMR metabolomics	Phenylalanine	0.0777159	0.0574466	0.0309426	0.0513482	0.0658033
NMR metabolomics	Tyrosine	0.157038	0.125289	0.0930571	0.124673	0.142128
NMR metabolomics	Glucose	0.128647	0.119502	0.103857	0.118734	0.124664
NMR metabolomics	Lactate	0.118095	0.10853	0.0822576	0.113614	0.0922351
NMR metabolomics	Pyruvate	0.0875825	0.073638	0.0415826	0.0688463	0.0946463
NMR metabolomics	Citrate	0.162162	0.1055	0.100429	0.116436	0.152241
NMR metabolomics	3-Hydroxybutyrate	0.0649814	0.036258	0.0165358	0.0428691	0.0481971
NMR metabolomics	Acetate	0.0336887	0.00604882	-0.000425922	0.00893024	0.0232473
NMR metabolomics	Acetoacetate	0.0773299	0.0625078	0.0505409	0.0666324	0.0655709
NMR metabolomics	Acetone	0.0767192	0.0479933	0.0439086	0.0577586	0.0693886
NMR metabolomics	Creatinine	0.500294	0.381554	0.444907	0.434014	0.476512
NMR metabolomics	Albumin	0.116215	0.0574115	0.070538	0.0727735	0.101915
NMR metabolomics	Glycoprotein Acetyls	0.300715	0.202207	0.215317	0.221163	0.242589
NMR metabolomics	Concentration of Chylomicrons and Extremely Large VLDL Particles	0.312846	0.237949	0.248761	0.270358	0.268777
NMR metabolomics	Total Lipids in Chylomicrons and Extremely Large VLDL	0.310382	0.239974	0.246356	0.266737	0.267027
NMR metabolomics	Phospholipids in Chylomicrons and Extremely Large VLDL	0.313984	0.240054	0.251476	0.271604	0.271059
NMR metabolomics	Cholesterol in Chylomicrons and Extremely Large VLDL	0.316172	0.241006	0.248386	0.269144	0.265642
NMR metabolomics	Cholesteryl Esters in Chylomicrons and Extremely Large VLDL	0.31688	0.243356	0.251076	0.27234	0.269075
NMR metabolomics	Free Cholesterol in Chylomicrons and Extremely Large VLDL	0.30736	0.232072	0.245059	0.262195	0.262841
NMR metabolomics	Triglycerides in Chylomicrons and Extremely Large VLDL	0.30645	0.232116	0.239539	0.261521	0.259497
NMR metabolomics	Concentration of Very Large VLDL Particles	0.341542	0.265939	0.279047	0.301392	0.295605
NMR metabolomics	Total Lipids in Very Large VLDL	0.339186	0.265146	0.275012	0.299566	0.292435
NMR metabolomics	Phospholipids in Very Large VLDL	0.33488	0.26002	0.270207	0.290566	0.283558
NMR metabolomics	Cholesterol in Very Large VLDL	0.314628	0.240068	0.252036	0.271876	0.262451
NMR metabolomics	Cholesteryl Esters in Very Large VLDL	0.298804	0.224711	0.233441	0.252128	0.2484
NMR metabolomics	Free Cholesterol in Very Large VLDL	0.327042	0.25297	0.262026	0.281958	0.275084
NMR metabolomics	Triglycerides in Very Large VLDL	0.341942	0.264547	0.278799	0.303733	0.297898
NMR metabolomics	Concentration of Large VLDL Particles	0.333073	0.259171	0.269931	0.293689	0.286087
NMR metabolomics	Total Lipids in Large VLDL	0.3305	0.257855	0.266238	0.28945	0.282957
NMR metabolomics	Phospholipids in Large VLDL	0.340235	0.266256	0.277503	0.295819	0.292973
NMR metabolomics	Cholesterol in Large VLDL	0.308008	0.235524	0.247622	0.266363	0.263282
NMR metabolomics	Cholesteryl Esters in Large VLDL	0.269768	0.198894	0.209724	0.225747	0.229599
NMR metabolomics	Free Cholesterol in Large VLDL	0.339212	0.264423	0.275607	0.296879	0.29147
NMR metabolomics	Triglycerides in Large VLDL	0.32884	0.25772	0.263463	0.290977	0.284129
NMR metabolomics	Concentration of Medium VLDL Particles	0.20411	0.147118	0.1489	0.168752	0.168846
NMR metabolomics	Total Lipids in Medium VLDL	0.236952	0.176101	0.174308	0.197172	0.195829
NMR metabolomics	Phospholipids in Medium VLDL	0.188215	0.134473	0.133745	0.15374	0.147231
NMR metabolomics	Cholesterol in Medium VLDL	0.116172	0.0656721	0.0607132	0.0927946	0.107431
NMR metabolomics	Cholesteryl Esters in Medium VLDL	0.119017	0.0737599	0.0698675	0.0925042	0.13422
NMR metabolomics	Free Cholesterol in Medium VLDL	0.159178	0.107381	0.103576	0.127846	0.123662
NMR metabolomics	Triglycerides in Medium VLDL	0.305025	0.236445	0.242645	0.268544	0.266177
NMR metabolomics	Concentration of Small VLDL Particles	0.258528	0.199449	0.205319	0.223725	0.22212
NMR metabolomics	Total Lipids in Small VLDL	0.252107	0.190058	0.196752	0.212899	0.213891
NMR metabolomics	Phospholipids in Small VLDL	0.200141	0.148418	0.14687	0.165314	0.166447
NMR metabolomics	Cholesterol in Small VLDL	0.181717	0.135668	0.135589	0.151006	0.151141
NMR metabolomics	Cholesteryl Esters in Small VLDL	0.200693	0.148484	0.150692	0.166361	0.167748
NMR metabolomics	Free Cholesterol in Small VLDL	0.152605	0.100801	0.10247	0.125375	0.121719
NMR metabolomics	Triglycerides in Small VLDL	0.285068	0.227926	0.237702	0.255367	0.256015
NMR metabolomics	Concentration of Very Small VLDL Particles	0.154367	0.0953754	0.106677	0.11001	0.139563
NMR metabolomics	Total Lipids in Very Small VLDL	0.166166	0.103951	0.111532	0.11398	0.149414
NMR metabolomics	Phospholipids in Very Small VLDL	0.160087	0.104125	0.110114	0.110987	0.14435
NMR metabolomics	Cholesterol in Very Small VLDL	0.18783	0.109409	0.138792	0.149557	0.179443
NMR metabolomics	Cholesteryl Esters in Very Small VLDL	0.2023	0.13843	0.157152	0.170681	0.20129
NMR metabolomics	Free Cholesterol in Very Small VLDL	0.159911	0.0941302	0.10987	0.110452	0.142396
NMR metabolomics	Triglycerides in Very Small VLDL	0.231023	0.192713	0.185344	0.199221	0.204956
NMR metabolomics	Concentration of IDL Particles	0.13552	0.0793737	0.0902817	0.108995	0.132266
NMR metabolomics	Total Lipids in IDL	0.201278	0.149029	0.163256	0.179424	0.211395
NMR metabolomics	Phospholipids in IDL	0.203813	0.147779	0.162439	0.177758	0.209953
NMR metabolomics	Cholesterol in IDL	0.20566	0.158856	0.171128	0.185943	0.219503
NMR metabolomics	Cholesteryl Esters in IDL	0.206725	0.155726	0.17288	0.182709	0.21335
NMR metabolomics	Free Cholesterol in IDL	0.201491	0.153622	0.163082	0.18277	0.212685
NMR metabolomics	Triglycerides in IDL	0.208848	0.172962	0.163716	0.176567	0.187527
NMR metabolomics	Concentration of Large LDL Particles	0.113042	0.0652055	0.0689646	0.0942289	0.106687
NMR metabolomics	Total Lipids in Large LDL	0.131241	0.0838098	0.0894034	0.101326	0.137348
NMR metabolomics	Phospholipids in Large LDL	0.127831	0.0803727	0.0819053	0.0974621	0.131602
NMR metabolomics	Cholesterol in Large LDL	0.129469	0.0840153	0.0867232	0.0993935	0.136757
NMR metabolomics	Cholesteryl Esters in Large LDL	0.127367	0.0779933	0.0851649	0.0957603	0.133723
NMR metabolomics	Free Cholesterol in Large LDL	0.148009	0.106303	0.109475	0.125598	0.164944
NMR metabolomics	Triglycerides in Large LDL	0.223868	0.188063	0.180492	0.194255	0.203327
NMR metabolomics	Concentration of Medium LDL Particles	0.17169	0.112614	0.116817	0.138967	0.14117
NMR metabolomics	Total Lipids in Medium LDL	0.167068	0.116509	0.122775	0.13816	0.144714
NMR metabolomics	Phospholipids in Medium LDL	0.161106	0.108024	0.115446	0.134086	0.13551
NMR metabolomics	Cholesterol in Medium LDL	0.157465	0.102593	0.115208	0.133645	0.133099
NMR metabolomics	Cholesteryl Esters in Medium LDL	0.187396	0.127822	0.136733	0.155505	0.16286
NMR metabolomics	Free Cholesterol in Medium LDL	0.106058	0.0587396	0.0581295	0.0774064	0.105045
NMR metabolomics	Triglycerides in Medium LDL	0.261761	0.21222	0.205818	0.225809	0.231397
NMR metabolomics	Concentration of Small LDL Particles	0.157754	0.107492	0.107283	0.131945	0.127407
NMR metabolomics	Total Lipids in Small LDL	0.150122	0.103426	0.107142	0.127998	0.126699
NMR metabolomics	Phospholipids in Small LDL	0.119559	0.0750524	0.0788596	0.104199	0.0957639
NMR metabolomics	Cholesterol in Small LDL	0.147241	0.0906172	0.0999258	0.121453	0.117447
NMR metabolomics	Cholesteryl Esters in Small LDL	0.17237	0.116449	0.122393	0.141872	0.144601
NMR metabolomics	Free Cholesterol in Small LDL	0.0921928	0.0482437	0.0474847	0.0657567	0.0890074
NMR metabolomics	Triglycerides in Small LDL	0.27365	0.218146	0.219522	0.242027	0.244118
NMR metabolomics	Concentration of Very Large HDL Particles	0.425292	0.321572	0.354479	0.371689	0.388828
NMR metabolomics	Total Lipids in Very Large HDL	0.437237	0.333671	0.366825	0.383799	0.397783
NMR metabolomics	Phospholipids in Very Large HDL	0.440194	0.331351	0.369729	0.387461	0.399752
NMR metabolomics	Cholesterol in Very Large HDL	0.436101	0.335009	0.365446	0.383908	0.397536
NMR metabolomics	Cholesteryl Esters in Very Large HDL	0.445698	0.342894	0.373995	0.395684	0.405661
NMR metabolomics	Free Cholesterol in Very Large HDL	0.385279	0.292709	0.31658	0.337184	0.348726
NMR metabolomics	Triglycerides in Very Large HDL	0.125839	0.0979489	0.0862956	0.0990018	0.116414
NMR metabolomics	Concentration of Large HDL Particles	0.462542	0.358142	0.396762	0.414608	0.426604
NMR metabolomics	Total Lipids in Large HDL	0.461049	0.358588	0.396236	0.414575	0.427587
NMR metabolomics	Phospholipids in Large HDL	0.456107	0.356089	0.395645	0.409498	0.425428
NMR metabolomics	Cholesterol in Large HDL	0.464896	0.361746	0.396616	0.414938	0.424732
NMR metabolomics	Cholesteryl Esters in Large HDL	0.465295	0.362861	0.397164	0.414293	0.424274
NMR metabolomics	Free Cholesterol in Large HDL	0.459742	0.354412	0.395317	0.40991	0.425719
NMR metabolomics	Triglycerides in Large HDL	0.198571	0.134931	0.156089	0.158101	0.190775
NMR metabolomics	Concentration of Medium HDL Particles	0.360932	0.281068	0.319186	0.329216	0.354301
NMR metabolomics	Total Lipids in Medium HDL	0.345301	0.266212	0.303978	0.313683	0.340609
NMR metabolomics	Phospholipids in Medium HDL	0.326205	0.248738	0.288404	0.296172	0.322177
NMR metabolomics	Cholesterol in Medium HDL	0.374301	0.29667	0.330097	0.343904	0.363637
NMR metabolomics	Cholesteryl Esters in Medium HDL	0.370715	0.295262	0.326365	0.339276	0.358837
NMR metabolomics	Free Cholesterol in Medium HDL	0.381416	0.295182	0.337187	0.34812	0.374666
NMR metabolomics	Triglycerides in Medium HDL	0.192659	0.152601	0.142747	0.15436	0.168603
NMR metabolomics	Concentration of Small HDL Particles	0.139443	0.100378	0.0980733	0.109555	0.12838
NMR metabolomics	Total Lipids in Small HDL	0.168572	0.120627	0.123875	0.142336	0.139739
NMR metabolomics	Phospholipids in Small HDL	0.180576	0.13026	0.137082	0.15013	0.152742
NMR metabolomics	Cholesterol in Small HDL	0.131215	0.0983047	0.0886144	0.109852	0.122525
NMR metabolomics	Cholesteryl Esters in Small HDL	0.116049	0.0822306	0.0707462	0.0859849	0.108624
NMR metabolomics	Free Cholesterol in Small HDL	0.187472	0.139181	0.155056	0.162419	0.183345
NMR metabolomics	Triglycerides in Small HDL	0.324221	0.255214	0.264615	0.287612	0.28895
NMR metabolomics	Phospholipids to Total Lipids in Chylomicrons and Extremely Large VLDL percentage	0.150713	0.129174	0.126317	0.133286	0.131744
NMR metabolomics	Cholesterol to Total Lipids in Chylomicrons and Extremely Large VLDL percentage	0.110795	0.0755029	0.0608334	0.0760619	0.0880333
NMR metabolomics	Cholesteryl Esters to Total Lipids in Chylomicrons and Extremely Large VLDL percentage	0.0769283	0.0432907	0.0356899	0.0419405	0.0581386
NMR metabolomics	Free Cholesterol to Total Lipids in Chylomicrons and Extremely Large VLDL percentage	0.154467	0.107744	0.0901558	0.118957	0.13309
NMR metabolomics	Triglycerides to Total Lipids in Chylomicrons and Extremely Large VLDL percentage	0.055237	0.0172696	0.0145202	0.0197983	0.0492743
NMR metabolomics	Phospholipids to Total Lipids in Very Large VLDL percentage	0.144293	0.109731	0.119298	0.121725	0.118783
NMR metabolomics	Cholesterol to Total Lipids in Very Large VLDL percentage	0.289679	0.230564	0.236122	0.253792	0.258749
NMR metabolomics	Cholesteryl Esters to Total Lipids in Very Large VLDL percentage	0.279014	0.22608	0.228605	0.245126	0.250586
NMR metabolomics	Free Cholesterol to Total Lipids in Very Large VLDL percentage	0.240743	0.184102	0.186617	0.204913	0.214766
NMR metabolomics	Triglycerides to Total Lipids in Very Large VLDL percentage	0.243703	0.192535	0.194301	0.20451	0.221042
NMR metabolomics	Phospholipids to Total Lipids in Large VLDL percentage	0.285741	0.223224	0.236255	0.252086	0.243929
NMR metabolomics	Cholesterol to Total Lipids in Large VLDL percentage	0.167257	0.121222	0.11037	0.132427	0.149245
NMR metabolomics	Cholesteryl Esters to Total Lipids in Large VLDL percentage	0.27223	0.209481	0.211214	0.233963	0.245777
NMR metabolomics	Free Cholesterol to Total Lipids in Large VLDL percentage	0.143104	0.117273	0.122723	0.123338	0.12615
NMR metabolomics	Triglycerides to Total Lipids in Large VLDL percentage	0.0562388	0.0399218	0.0402407	0.040851	0.046422
NMR metabolomics	Phospholipids to Total Lipids in Medium VLDL percentage	0.245723	0.186699	0.198232	0.203082	0.231478
NMR metabolomics	Cholesterol to Total Lipids in Medium VLDL percentage	0.337467	0.271092	0.283125	0.29772	0.308264
NMR metabolomics	Cholesteryl Esters to Total Lipids in Medium VLDL percentage	0.350525	0.285192	0.294498	0.308387	0.320946
NMR metabolomics	Free Cholesterol to Total Lipids in Medium VLDL percentage	0.288325	0.218586	0.236471	0.250612	0.259868
NMR metabolomics	Triglycerides to Total Lipids in Medium VLDL percentage	0.323153	0.257752	0.269547	0.285442	0.296333
NMR metabolomics	Phospholipids to Total Lipids in Small VLDL percentage	0.2739	0.226261	0.232616	0.238935	0.251115
NMR metabolomics	Cholesterol to Total Lipids in Small VLDL percentage	0.199333	0.157351	0.15429	0.165214	0.182194
NMR metabolomics	Cholesteryl Esters to Total Lipids in Small VLDL percentage	0.109609	0.0857562	0.0703606	0.0809398	0.100895
NMR metabolomics	Free Cholesterol to Total Lipids in Small VLDL percentage	0.285271	0.233569	0.24257	0.249103	0.262432
NMR metabolomics	Triglycerides to Total Lipids in Small VLDL percentage	0.225148	0.180862	0.182682	0.189217	0.207181
NMR metabolomics	Phospholipids to Total Lipids in Very Small VLDL percentage	0.205613	0.170642	0.176383	0.190952	0.184095
NMR metabolomics	Cholesterol to Total Lipids in Very Small VLDL percentage	0.324086	0.268803	0.274861	0.286759	0.29754
NMR metabolomics	Cholesteryl Esters to Total Lipids in Very Small VLDL percentage	0.340121	0.285562	0.29336	0.302946	0.313962
NMR metabolomics	Free Cholesterol to Total Lipids in Very Small VLDL percentage	0.112123	0.0827605	0.0735993	0.08314	0.100777
NMR metabolomics	Triglycerides to Total Lipids in Very Small VLDL percentage	0.317339	0.260876	0.266822	0.280333	0.2921
NMR metabolomics	Phospholipids to Total Lipids in IDL percentage	0.0386492	0.0439052	0.0205545	0.0359042	0.0434321
NMR metabolomics	Cholesterol to Total Lipids in IDL percentage	0.231895	0.192118	0.192202	0.199748	0.20937
NMR metabolomics	Cholesteryl Esters to Total Lipids in IDL percentage	0.205685	0.174828	0.184048	0.18542	0.196202
NMR metabolomics	Free Cholesterol to Total Lipids in IDL percentage	0.148159	0.110065	0.107922	0.116823	0.113659
NMR metabolomics	Triglycerides to Total Lipids in IDL percentage	0.275139	0.228845	0.228946	0.240505	0.252278
NMR metabolomics	Phospholipids to Total Lipids in Large LDL percentage	0.089074	0.0578106	0.0579818	0.0633382	0.0736558
NMR metabolomics	Cholesterol to Total Lipids in Large LDL percentage	0.235967	0.188694	0.190101	0.206704	0.215767
NMR metabolomics	Cholesteryl Esters to Total Lipids in Large LDL percentage	0.0700149	0.0366286	0.0341507	0.049302	0.075732
NMR metabolomics	Free Cholesterol to Total Lipids in Large LDL percentage	0.326224	0.266458	0.273743	0.293733	0.297956
NMR metabolomics	Triglycerides to Total Lipids in Large LDL percentage	0.229401	0.192346	0.187263	0.196527	0.211333
NMR metabolomics	Phospholipids to Total Lipids in Medium LDL percentage	0.0996974	0.0857818	0.0745157	0.0849282	0.0824776
NMR metabolomics	Cholesterol to Total Lipids in Medium LDL percentage	0.118345	0.0915952	0.0789978	0.0938705	0.124179
NMR metabolomics	Cholesteryl Esters to Total Lipids in Medium LDL percentage	0.244928	0.182498	0.184945	0.204973	0.203976
NMR metabolomics	Free Cholesterol to Total Lipids in Medium LDL percentage	0.319242	0.252601	0.265077	0.284817	0.28462
NMR metabolomics	Triglycerides to Total Lipids in Medium LDL percentage	0.176522	0.142471	0.138162	0.147037	0.161056
NMR metabolomics	Phospholipids to Total Lipids in Small LDL percentage	0.210438	0.144659	0.150182	0.169502	0.181844
NMR metabolomics	Cholesterol to Total Lipids in Small LDL percentage	0.105217	0.0711578	0.0611188	0.0699177	0.114748
NMR metabolomics	Cholesteryl Esters to Total Lipids in Small LDL percentage	0.198034	0.137497	0.138824	0.163647	0.167397
NMR metabolomics	Free Cholesterol to Total Lipids in Small LDL percentage	0.230393	0.179271	0.181083	0.193272	0.201439
NMR metabolomics	Triglycerides to Total Lipids in Small LDL percentage	0.241898	0.190277	0.193362	0.205479	0.213862
NMR metabolomics	Phospholipids to Total Lipids in Very Large HDL percentage	0.370752	0.285411	0.319242	0.323647	0.343196
NMR metabolomics	Cholesterol to Total Lipids in Very Large HDL percentage	0.293341	0.210109	0.248084	0.242018	0.271663
NMR metabolomics	Cholesteryl Esters to Total Lipids in Very Large HDL percentage	0.091952	0.0579971	0.0638012	0.0607924	0.0950701
NMR metabolomics	Free Cholesterol to Total Lipids in Very Large HDL percentage	0.418807	0.326053	0.366862	0.376433	0.390816
NMR metabolomics	Triglycerides to Total Lipids in Very Large HDL percentage	0.310812	0.247444	0.260073	0.282888	0.286832
NMR metabolomics	Phospholipids to Total Lipids in Large HDL percentage	0.3356	0.257061	0.25393	0.289922	0.295401
NMR metabolomics	Cholesterol to Total Lipids in Large HDL percentage	0.366874	0.289168	0.303157	0.332612	0.333694
NMR metabolomics	Cholesteryl Esters to Total Lipids in Large HDL percentage	0.353711	0.283015	0.28497	0.31391	0.317934
NMR metabolomics	Free Cholesterol to Total Lipids in Large HDL percentage	0.32075	0.233721	0.277165	0.28405	0.298927
NMR metabolomics	Triglycerides to Total Lipids in Large HDL percentage	0.325332	0.262361	0.282373	0.297872	0.301334
NMR metabolomics	Phospholipids to Total Lipids in Medium HDL percentage	0.354407	0.279379	0.29271	0.318601	0.31013
NMR metabolomics	Cholesterol to Total Lipids in Medium HDL percentage	0.343397	0.274162	0.290215	0.307157	0.302202
NMR metabolomics	Cholesteryl Esters to Total Lipids in Medium HDL percentage	0.294615	0.237411	0.239173	0.256907	0.255941
NMR metabolomics	Free Cholesterol to Total Lipids in Medium HDL percentage	0.42552	0.334446	0.373288	0.388826	0.404044
NMR metabolomics	Triglycerides to Total Lipids in Medium HDL percentage	0.313344	0.253761	0.267226	0.281216	0.277814
NMR metabolomics	Phospholipids to Total Lipids in Small HDL percentage	0.24793	0.160566	0.213185	0.203425	0.235576
NMR metabolomics	Cholesterol to Total Lipids in Small HDL percentage	0.155673	0.11649	0.107449	0.121642	0.13389
NMR metabolomics	Cholesteryl Esters to Total Lipids in Small HDL percentage	0.137844	0.10266	0.0936388	0.0971096	0.121613
NMR metabolomics	Free Cholesterol to Total Lipids in Small HDL percentage	0.284114	0.201822	0.225749	0.248937	0.256181
NMR metabolomics	Triglycerides to Total Lipids in Small HDL percentage	0.343223	0.280614	0.2977	0.312483	0.304485
Local environment	Nitrogen dioxide air pollution; 2010	0.0958678	0.0794437	0.0883281	0.0944896	0.0831329
Local environment	Nitrogen oxides air pollution; 2010	0.0729915	0.068073	0.063062	0.0751243	0.0564902
Local environment	Particulate matter air pollution (pm10); 2010	0.0797418	0.0878376	0.085898	0.0977324	0.0847099
Local environment	Particulate matter air pollution (pm2.5); 2010	0.0686624	0.0685962	0.0625892	0.0819017	0.0613214
Local environment	Particulate matter air pollution (pm2.5) absorbance; 2010	0.137388	0.147733	0.145413	0.164654	0.14061
Local environment	Particulate matter air pollution 2.5-10um; 2010	0.0424309	0.0620107	0.0524278	0.0624329	0.0485795
Local environment	Inverse distance to the nearest road	0.0026906	-0.000726196	-0.00444456	0.0172364	-0.00120152
Local environment	Traffic intensity on the nearest major road	0.0305651	0.0275177	0.0291188	0.0365626	0.0206616
Local environment	Inverse distance to the nearest major road	0.00415164	-0.00974953	-0.0107944	-0.00299987	-2.71989e-05
Local environment	Nitrogen dioxide air pollution; 2005	0.199303	0.219704	0.214941	0.248182	0.21886
Local environment	Nitrogen dioxide air pollution; 2006	0.178929	0.192655	0.186864	0.215337	0.191426
Local environment	Nitrogen dioxide air pollution; 2007	0.242619	0.270203	0.259735	0.30236	0.267695
Local environment	Particulate matter air pollution (pm10); 2007	0.327076	0.370675	0.354129	0.421167	0.367189
Local environment	Average daytime sound level of noise pollution	-0.0130028	0.00234519	0.0051499	0.00822291	-0.00454651
Local environment	Average evening sound level of noise pollution	-0.0144695	0.00244023	0.00196988	0.00811081	-0.0106215
Local environment	Average night-time sound level of noise pollution	-0.0109063	0.00348373	0.00434943	0.00704111	-0.00594373
Local environment	Average 16-hour sound level of noise pollution	-0.0144712	-0.000685225	0.00372057	0.0106331	-0.00826816
Local environment	Average 24-hour sound level of noise pollution	-0.0144646	0.00229491	0.00544375	0.00852578	-0.00559577
Local environment	Greenspace percentage, buffer 1000m	0.127003	0.114335	0.127578	0.137563	0.117977
Local environment	Domestic garden percentage, buffer 1000m	0.0800294	0.0955831	0.0790705	0.102947	0.0965676
Local environment	Water percentage, buffer 1000m	0.00519803	0.0133257	0.00882391	0.0233544	0.0153861
Local environment	Greenspace percentage, buffer 300m	0.0942123	0.0847878	0.0986376	0.103428	0.092251
Local environment	Domestic garden percentage, buffer 300m	0.0602387	0.0677043	0.0555693	0.0747016	0.0682521
Local environment	Water percentage, buffer 300m	-0.011625	-0.00709725	-0.00636763	0.00424492	-0.00751343
Local environment	Natural environment percentage, buffer 1000m	0.109234	0.0907351	0.107519	0.110867	0.0990281
Local environment	Natural environment percentage, buffer 300m	0.0780362	0.0546751	0.0783765	0.0833107	0.0732249
Local environment	Distance (Euclidean) to coast	0.349396	0.409114	0.370029	0.465436	0.398685
Diet by 24-hour recall	Total weight of all foods and beverages	0.134898	0.109084	0.0603104	0.115864	0.111492
Diet by 24-hour recall	Total weight of beverages only	0.150314	0.117925	0.110313	0.12004	0.129846
Diet by 24-hour recall	Energy	0.23259	0.172658	0.192097	0.208463	0.222627
Diet by 24-hour recall	Energy from beverages	0.227571	0.168029	0.168669	0.199673	0.213872
Diet by 24-hour recall	Energy density	0.205863	0.157977	0.144749	0.175861	0.19494
Diet by 24-hour recall	Protein	0.159732	0.113355	0.0932225	0.131126	0.156411
Diet by 24-hour recall	Vegetable protein	0.164317	0.106156	0.0979297	0.109049	0.137593
Diet by 24-hour recall	Animal protein	0.1005	0.0935403	0.0517381	0.0931695	0.119893
Diet by 24-hour recall	Fat	0.16167	0.11795	0.122209	0.134081	0.155125
Diet by 24-hour recall	Vegetable fat	0.0798329	0.0533449	0.032101	0.077147	0.068499
Diet by 24-hour recall	Animal fat	0.150931	0.112487	0.112969	0.132087	0.143519
Diet by 24-hour recall	Total sugars	0.114534	0.0811418	0.0617361	0.100013	0.0921653
Diet by 24-hour recall	Free sugar	0.167819	0.119416	0.101897	0.133171	0.161548
Diet by 24-hour recall	Carbohydrate	0.206738	0.151595	0.150437	0.17141	0.177803
Diet by 24-hour recall	Saturated fatty acids	0.160348	0.121678	0.110408	0.141044	0.160896
Diet by 24-hour recall	n-3 fatty acids	0.0528593	0.0356681	0.018663	0.0304814	0.0484538
Diet by 24-hour recall	n-6 fatty acids	0.0876362	0.0611489	0.0417301	0.072948	0.0785329
Diet by 24-hour recall	Englyst fibre	0.0944889	0.034705	0.0264816	0.0249474	0.0456998
Diet by 24-hour recall	Calcium	0.140789	0.0887149	0.0126884	0.0826369	0.113354
Diet by 24-hour recall	Iron	0.15737	0.111911	0.0998695	0.115467	0.142909
Diet by 24-hour recall	Vitamin B6	0.209217	0.154467	0.157793	0.184316	0.188671
Diet by 24-hour recall	Vitamin B12	0.0504689	0.0261465	-0.00467668	0.0253177	0.0524412
Diet by 24-hour recall	Folate	0.133532	0.0763333	0.0840407	0.106031	0.101554
Diet by 24-hour recall	Vitamin C	0.0592781	0.0600739	0.00382448	0.0464953	0.0536281
Diet by 24-hour recall	Potassium	0.121415	0.0923167	0.0538663	0.0973316	0.106418
Diet by 24-hour recall	Magnesium	0.177337	0.119842	0.128032	0.129564	0.157682
Diet by 24-hour recall	Retinol	0.00990658	0.0136982	0.0150569	0.0411603	0.0223166
Diet by 24-hour recall	Total carotene	0.0295934	0.0327039	-0.00466166	0.0195514	0.0257361
Diet by 24-hour recall	Vitamin E	0.0403526	0.0313925	0.00932712	0.0287625	0.00665731
Diet by 24-hour recall	Vitamin D	0.042533	0.0327973	0.00778357	0.0129192	0.0416243
Diet by 24-hour recall	Starch	0.2128	0.135723	0.135469	0.171984	0.194145
Diet by 24-hour recall	Monounsaturated fatty acids	0.143935	0.113487	0.116178	0.119402	0.135614
Diet by 24-hour recall	Zinc	0.127483	0.102578	0.0628968	0.103393	0.126123
Diet by 24-hour recall	Thiamin	0.115042	0.0806188	0.0745413	0.110106	0.103754
Diet by 24-hour recall	Riboflavin	0.118098	0.0722618	0.032753	0.0657642	0.114985
Diet by 24-hour recall	Phosphorus	0.166465	0.116037	0.109295	0.133665	0.147946
Diet by 24-hour recall	Cholesterol	0.088736	0.061577	0.0443698	0.0697079	0.0946745
Diet by 24-hour recall	Alpha-carotene	0.0056336	0.0364008	-0.0046827	0.00912626	0.0182024
Diet by 24-hour recall	Beta-carotene	0.0335655	0.0476456	-0.0306536	0.0174641	0.0188593
Diet by 24-hour recall	Beta cryptoxanthin	0.00189539	-0.0337513	0.0114645	0.00192887	-0.00169592
Diet by 24-hour recall	Biotin	0.150131	0.11117	0.0988678	0.119214	0.152504
Diet by 24-hour recall	Chloride	0.190934	0.137271	0.124687	0.155351	0.179099
Diet by 24-hour recall	Copper	0.125168	0.0862128	0.0818092	0.0989073	0.10938
Diet by 24-hour recall	Fructose	0.096662	0.0732815	0.0153927	0.0662703	0.0739543
Diet by 24-hour recall	Glucose	0.093946	0.0695283	0.0360366	0.0604164	0.0729366
Diet by 24-hour recall	Haem iron	0.0606006	0.0498125	0.00246605	0.0534105	0.0702617
Diet by 24-hour recall	Iodine	0.0754895	0.0826273	0.0292969	0.0753392	0.0702747
Diet by 24-hour recall	Lactose	0.0764508	0.0684561	0.0309986	0.0517046	0.0566117
Diet by 24-hour recall	Maltose	0.281774	0.19991	0.22362	0.239039	0.256447
Diet by 24-hour recall	Intrinsic and milk sugars	0.0912969	0.0524941	0.0187083	0.068896	0.0583607
Diet by 24-hour recall	Manganese	0.152993	0.0918365	0.0889233	0.114808	0.0955202
Diet by 24-hour recall	Sodium	0.186996	0.130323	0.102932	0.143322	0.182373
Diet by 24-hour recall	Non-haem iron	0.155985	0.101674	0.0919683	0.104557	0.144028
Diet by 24-hour recall	Niacin equivalent	0.184449	0.136894	0.135174	0.16293	0.164541
Diet by 24-hour recall	Non-milk extrinsic sugars	0.155166	0.106029	0.0872761	0.112273	0.144956
Diet by 24-hour recall	Other Sugars	0.0116549	0.00489279	-0.0129263	0.00646544	0.0199274
Diet by 24-hour recall	Pantothenic acid	0.120576	0.106153	0.0859396	0.107996	0.107794
Diet by 24-hour recall	Selenium	0.0649912	0.0262343	-0.00757461	0.030027	0.0714313
Diet by 24-hour recall	Sucrose	0.110401	0.0875569	0.0256878	0.0679083	0.0959188
Diet by 24-hour recall	Total nitrogen	0.165193	0.120426	0.092232	0.138435	0.164134
Diet by 24-hour recall	Vitamin A retinol equivalents	0.00370305	-0.00449411	-0.00261995	0.0199495	0.0185581
Population characteristics	Index of Multiple Deprivation (England)	0.133987	0.110854	0.101943	0.122176	0.115101
Population characteristics	Income score (England)	0.121201	0.101622	0.0938881	0.112817	0.100707
Population characteristics	Employment score (England)	0.185201	0.174118	0.163864	0.197392	0.183024
Population characteristics	Health score (England)	0.267154	0.264861	0.272581	0.308337	0.290374
Population characteristics	Education score (England)	0.183543	0.153243	0.152268	0.181881	0.164494
Population characteristics	Housing score (England)	0.204949	0.207974	0.201985	0.236087	0.202567
Population characteristics	Crime score (England)	0.116047	0.118679	0.100932	0.137788	0.10674
Population characteristics	Living environment score (England)	0.160822	0.179648	0.149198	0.212016	0.165755
Population characteristics	Income score (Wales)	0	0	0	0	0
Population characteristics	Employment score (Wales)	0	0	0	0	0
Population characteristics	Health score (Wales)	0	0	0	0	0
Population characteristics	Education score (Wales)	0	0	0	0	0
Population characteristics	Access to services score (Wales)	0	0	0	0	0
Population characteristics	Housing score (Wales)	0	0	0	0	0
Population characteristics	Physical environment score (Wales)	0	0	0	0	0
Population characteristics	Community safety score (Wales)	0	0	0	0	0
Population characteristics	Index of Multiple Deprivation (Wales)	0	0	0	0	0
Population characteristics	Index of Multiple Deprivation (Scotland)	0.121791	0.125493	0.0368102	0.125347	0.11023
Population characteristics	Income score (Scotland)	0.122456	0.100062	0.0204652	0.103369	0.0888636
Population characteristics	Employment score (Scotland)	0.102846	0.0992642	0.0459607	0.113598	0.0968848
Population characteristics	Health score (Scotland)	0.138625	0.114422	0.0195208	0.114353	0.109997
Population characteristics	Education score (Scotland)	0.136926	0.10891	0.035912	0.0968429	0.132132
Population characteristics	Housing score (Scotland)	0.0608683	-0.0173904	0.0325987	0.0528236	0.0131766
Population characteristics	Access to services score (Scotland)	0.00673612	-0.0512049	-0.0383216	-0.0359083	-0.0545092
Population characteristics	Crime score (Scotland)	-0.0418191	0.0298884	-0.000672947	0.0113759	-0.0272345
Sex-specific factors	Age at first live birth	0.271838	0.202803	0.222247	0.23398	0.260963
Sex-specific factors	Age at last live birth	0.221947	0.160823	0.179103	0.186547	0.212453
Eye measures	Overall macular thickness (left)	0.100497	0.10052	0.0334525	0.100735	0.0915172
Eye measures	Overall macular thickness (right)	0.0243425	0.0898702	0.0392244	0.09826	0.0485691
Eye measures	Macular thickness at the central subfield (left)	0.117555	0.0784477	0.0557152	0.103878	0.100012
Eye measures	Macular thickness at the central subfield (right)	0.0764419	0.0462959	0.0120249	0.0514861	0.0968574
Eye measures	Macular thickness at the inner inferior subfield (left)	0.108709	0.0899488	0.0218364	0.079045	0.112451
Eye measures	Macular thickness at the inner inferior subfield (right)	0.0288708	0.0416762	0.00388829	0.0571586	0.0532784
Eye measures	Macular thickness at the inner nasal subfield (left)	0.100939	0.0700325	0.0437102	0.0871319	0.0938255
Eye measures	Macular thickness at the inner nasal subfield (right)	0.0569628	0.0662975	0.00592552	0.0952207	0.0692013
Eye measures	Macular thickness at the inner superior subfield (left)	0.076864	0.0792241	0.000631274	0.0990418	0.0842311
Eye measures	Macular thickness at the inner superior subfield (right)	0.0575281	0.0837249	0.0270155	0.0825615	0.0721644
Eye measures	Macular thickness at the inner temporal subfield (left)	0.0885034	0.0771177	0.0155899	0.0811441	0.10411
Eye measures	Macular thickness at the inner temporal subfield (right)	0.0645475	0.0771453	0.0518352	0.083874	0.0874371
Eye measures	Macular thickness at the outer inferior subfield (left)	0.0557648	0.0732097	0.0336319	0.0848256	0.0444471
Eye measures	Macular thickness at the outer inferior subfield (right)	0.0168182	0.0585431	-0.00395758	0.0366626	0.0260423
Eye measures	Macular thickness at the outer nasal subfield (left)	0.069301	0.0795891	0.0275442	0.0942572	0.067799
Eye measures	Macular thickness at the outer nasal subfield (right)	0.0745967	0.102292	0.0620356	0.118221	0.0920088
Eye measures	Macular thickness at the outer superior subfield (left)	0.0514569	0.0540012	0.037235	0.085557	0.0551877
Eye measures	Macular thickness at the outer superior subfield (right)	0.0104291	0.0704172	0.0044194	0.0668596	0.0316442
Eye measures	Macular thickness at the outer temporal subfield (left)	0.0972405	0.0822718	0.0624953	0.0904847	0.0883276
Eye measures	Macular thickness at the outer temporal subfield (right)	0.0219365	0.0438695	0.0100553	0.0512041	0.0300331
Eye measures	Total macular volume (left)	0.105235	0.0741502	0.130699	0.159041	0.131816
Eye measures	Total macular volume (right)	0.135821	0.195763	0.0927029	0.199233	0.0616785
Eye measures	Overall average retinal pigment epithelium thickness (left)	-0.00317484	0.0134932	0.0395546	0.0333294	0.0231497
Eye measures	Overall average retinal pigment epithelium thickness (right)	-0.0169449	-0.0162214	0.00350424	0.00337503	0.0187924
Eye measures	Retinal pigment epithelium thickness at central subfield (left)	0.0631877	0.0693418	0.0284601	0.0972987	0.0710849
Eye measures	Retinal pigment epithelium thickness at central subfield (right)	0.0999264	0.0980328	0.0795343	0.0975914	0.117696
Eye measures	Retinal pigment epithelium thickness at inner inferior subfield (left)	-0.029542	0.0175303	-0.0130835	0.0318614	0.0268064
Eye measures	Retinal pigment epithelium thickness at inner inferior subfield (right)	0.0745158	0.00288177	0.055055	0.0833692	0.0928728
Eye measures	Retinal pigment epithelium thickness at inner nasal subfield (left)	0.00950043	0.0402104	0.0499805	0.0758399	0.0977008
Eye measures	Retinal pigment epithelium thickness at inner nasal subfield (right)	0.0405093	0.0130462	0.00289168	0.0216366	0.0287868
Eye measures	Retinal pigment epithelium thickness at inner superior subfield (left)	0.0352049	0.0482755	-0.0411065	0.019044	0.057028
Eye measures	Retinal pigment epithelium thickness at inner superior subfield (right)	0.0441911	0.0382136	0.0100635	0.0733162	0.0492976
Eye measures	Retinal pigment epithelium thickness at inner temporal subfield (left)	-0.00851665	0.0616113	0.0677728	0.112057	0.0324049
Eye measures	Retinal pigment epithelium thickness at inner temporal subfield (right)	0.0339784	-0.0187535	0.062237	0.0755852	0.00125717
Eye measures	Retinal pigment epithelium thickness at outer inferior subfield (left)	-0.00837189	0.0663638	-0.00967643	0.0651269	0.061608
Eye measures	Retinal pigment epithelium thickness at outer inferior subfield (right)	0.0925282	0.0149033	0.0419466	0.0421305	0.0780993
Eye measures	Retinal pigment epithelium thickness at outer nasal subfield (left)	0.0936852	0.0360547	0.0306313	0.0953671	0.103118
Eye measures	Retinal pigment epithelium thickness at outer nasal subfield (right)	0.161473	-0.0230853	0.0121601	-0.0165408	0.123308
Eye measures	Retinal pigment epithelium thickness at outer superior subfield (left)	-0.0231436	0.000568259	-0.0233956	0.00476665	0.0710731
Eye measures	Retinal pigment epithelium thickness at outer superior subfield (right)	0.0769372	0.00137236	0.0587105	0.0181327	0.0591966
Eye measures	Retinal pigment epithelium thickness at outer temporal subfield (left)	0.0580934	0.0934589	0.0228619	0.10381	0.0793195
Eye measures	Retinal pigment epithelium thickness at outer temporal subfield (right)	0.0822776	-0.00980099	-0.0110929	-0.004728	0.0756731
Eye measures	Disc diameter after inverse rank normal transformation (left)	0.00120582	-0.00523496	-0.00871812	0.00217551	0.0103543
Eye measures	Disc diameter after inverse rank normal transformation (right)	0	0	0	0	0
Eye measures	Mean of vertical disc diameter (left)	0.0189842	0.0125414	-0.0106628	0.0120618	0.0124562
Eye measures	Mean of vertical disc diameter (right)	0	0	0	0	0
Eye measures	Vertical cup to disc ratio (VCDR) regressed and transformed (left)	0.0164815	-0.00939766	0.0476237	0.0385036	0.00307226
Eye measures	Vertical cup to disc ratio (VCDR) regressed and transformed (right)	0	0	0	0	0
Eye measures	Vertical cup to disc ratio (VCDR) (left)	0.050227	-0.0133795	0.0168603	0.0435347	0.0405975
Eye measures	Vertical cup to disc ratio (VCDR) (right)	0	0	0	0	0
Sex-specific factors	Age started oral contraceptive pill	0.32666	0.278853	0.293497	0.291201	0.336088
Sex-specific factors	Age when last used oral contraceptive pill	0.109783	0.0931437	0.0628885	0.100648	0.107582
Sex-specific factors	Age at hysterectomy	0.212457	0.149294	0.137787	0.211065	0.192058
Eye measures	Average retinal nerve fibre layer thickness (left)	0.0320294	0.0813945	0.00430257	0.0861558	0.0393063
Eye measures	Average retinal nerve fibre layer thickness (right)	0.0443824	0.102123	0.0476446	0.108552	0.0642541
Eye measures	Average inner nuclear layer thickness (left)	0.0569385	0.0565204	0.0231874	0.053285	0.0875253
Eye measures	Average inner nuclear layer thickness (right)	-0.00474672	0.0355615	0.00250659	0.0247786	0.0352333
Eye measures	Average ganglion cell-inner plexiform layer thickness (left)	0.0803285	0.130627	0.0820539	0.133022	0.102173
Eye measures	Average ganglion cell-inner plexiform layer thickness (right)	0.0847649	0.127576	0.10465	0.149018	0.101103
Eye measures	INL-ELM thickness of the central subfield (left)	0.0820592	0.0495835	0.0258708	0.0376889	0.0859849
Eye measures	INL-ELM thickness of the central subfield (right)	0.0615833	0.0569925	-2.84229e-05	0.0206479	0.075557
Eye measures	INL-ELM thickness of the inner subfield (left)	0.0716255	0.0544153	0.0225493	0.0443935	0.0687865
Eye measures	INL-ELM thickness of the inner subfield (right)	0.0446935	0.0162957	0.0169638	0.0330756	0.0616692
Eye measures	INL-ELM thickness of the outer subfield (left)	0.0753008	0.0478618	0.0209503	0.0522194	0.0915622
Eye measures	INL-ELM thickness of the outer subfield (right)	0.0290975	0.0119209	0.00625081	0.0146459	0.0231534
Eye measures	Average INL-ELM thickness (left)	0.0820238	0.0664455	0.010961	0.0457131	0.0887542
Eye measures	Average INL-ELM thickness (right)	0.0335389	0.0106922	0.0105135	0.0131704	0.0403123
Eye measures	ELM-ISOS thickness of central subfield (left)	0.0610339	0.0215296	0.0110187	0.0376108	0.0623533
Eye measures	ELM-ISOS thickness of central subfield (right)	0.0196512	0.0212673	0.0255698	0.0264131	0.0177247
Eye measures	ELM-ISOS thickness of inner subfield (left)	0.0557553	0.0258258	0.0339632	0.0641489	0.051014
Eye measures	ELM-ISOS thickness of inner subfield (right)	0.00658706	0.00371272	0.0391168	0.0357753	0.0199506
Eye measures	ELM-ISOS thickness of outer subfield (left)	0.0509493	0.0140485	0.0121085	0.0398613	0.057067
Eye measures	ELM-ISOS thickness of outer subfield (right)	0.0258432	0.00874724	0.01284	0.0458314	0.0468442
Eye measures	Average ELM-ISOS thickness (left)	0.0401213	0.0338291	0.0223136	0.0460138	0.059779
Eye measures	Average ELM-ISOS thickness (right)	0.0190896	0.021556	0.0187116	0.0540792	0.0394502
Eye measures	ISOS-RPE thickness of central subfield (left)	-0.00446249	-0.00996555	-0.0150695	0.0123759	0.0142897
Eye measures	ISOS-RPE thickness of central subfield (right)	0.0462175	0.0369807	0.0542128	0.0665589	0.0634156
Eye measures	ISOS-RPE thickness of inner subfield (left)	-0.00207233	-0.0151981	-0.0178923	-0.0145052	0.00663812
Eye measures	ISOS-RPE thickness of inner subfield (right)	0.012583	-0.00830575	0.00344788	0.0230345	-0.014275
Eye measures	ISOS-RPE thickness of outer subfield (left)	0.0270304	-0.0256164	-0.0125589	0.00723951	0.0195914
Eye measures	ISOS-RPE thickness of outer subfield (right)	0.00944827	0.00556125	-0.0159131	0.012656	0.00818124
Eye measures	Average ISOS-RPE thickness (left)	0.0181701	-0.0109688	-0.00784389	-0.00299467	0.0198648
Eye measures	Average ISOS-RPE thickness (right)	0.00110466	0.0139877	-0.0140687	0.0133258	0.00644601
Eye measures	INL-RPE thickness of central subfield (left)	0.0704395	0.0346662	0.00428574	0.0257835	0.0681753
Eye measures	INL-RPE thickness of central subfield (right)	0.0379643	0.0386626	0.0271841	0.0416323	0.0363556
Eye measures	INL-RPE thickness of inner subfield (left)	0.0727855	0.0536216	-0.000743939	0.0182219	0.0626749
Eye measures	INL-RPE thickness of inner subfield (right)	0.0325032	0.0286579	0.0272126	0.0495535	0.0503337
Eye measures	INL-RPE thickness of outer subfield (left)	0.0897209	0.0644146	0.0139708	0.0266847	0.0850145
Eye measures	INL-RPE thickness of outer subfield (right)	0.0411166	0.0129972	0.0190668	0.0336633	0.0268869
Eye measures	Average INL-RPE thickness (left)	0.0811593	0.0610861	-0.0104181	0.0277334	0.0777094
Eye measures	Average INL-RPE thickness (right)	0.0291209	0.0105169	0.0218785	0.0240652	0.022157
Lifestyle and environment	Age started smoking in former smokers	0.109537	0.0608264	0.0654674	0.086582	0.0914101
Lifestyle and environment	Age stopped smoking	0.260528	0.224469	0.221985	0.24404	0.239753
Family history	Father's age	0.492847	0.416138	0.445425	0.466088	0.506214
Health and medical history	Age high blood pressure diagnosed	0.406998	0.370116	0.370894	0.394739	0.404003
Health and medical history	Age diabetes diagnosed	0.346293	0.290663	0	0	0.301583
Blood assays	White blood cell (leukocyte) count	0.164884	0.110705	0.115063	0.124331	0.129151
Blood assays	Red blood cell (erythrocyte) count	0.483944	0.376102	0.448288	0.439823	0.480894
Blood assays	Haemoglobin concentration	0.566126	0.438489	0.518148	0.510234	0.561041
Blood assays	Haematocrit percentage	0.539256	0.416126	0.493738	0.484823	0.534534
Blood assays	Mean corpuscular volume	0.158569	0.142729	0.150134	0.162282	0.160103
Blood assays	Mean corpuscular haemoglobin	0.164641	0.142429	0.152138	0.166889	0.165272
Blood assays	Mean corpuscular haemoglobin concentration	0.0963497	0.0862302	0.0912616	0.100622	0.0963455
Blood assays	Red blood cell (erythrocyte) distribution width	0.0862767	0.0532375	0.0732722	0.0739629	0.0849948
Blood assays	Platelet count	0.233606	0.169138	0.19897	0.204064	0.224948
Blood assays	Platelet crit	0.286761	0.204253	0.254271	0.252215	0.275518
Blood assays	Mean platelet (thrombocyte) volume	0.054034	0.0472688	0.0502266	0.0574876	0.059091
Blood assays	Platelet distribution width	0.127773	0.0961323	0.102253	0.113362	0.126141
Blood assays	Lymphocyte count	0.095954	0.0624172	0.0555644	0.0671646	0.0707777
Blood assays	Monocyte count	0.173148	0.158513	0.151941	0.166623	0.171857
Blood assays	Neutrophill count	0.156897	0.101044	0.101795	0.120045	0.125975
Blood assays	Eosinophill count	0.16435	0.117952	0.0847179	0.122984	0.150262
Blood assays	Lymphocyte percentage	0.10725	0.0860642	0.0762432	0.0999258	0.111148
Blood assays	Monocyte percentage	0.178175	0.13957	0.164105	0.160272	0.171949
Blood assays	Neutrophill percentage	0.0608471	0.0491614	0.0289431	0.0491587	0.0568743
Blood assays	Eosinophill percentage	0.166397	0.112994	0.0895664	0.118101	0.152835
Blood assays	Basophill percentage	0.0305338	0.0230451	0.0283688	0.0264328	0.0428464
Blood assays	Reticulocyte percentage	0.15281	0.101766	0.0941335	0.119571	0.114746
Blood assays	Reticulocyte count	0.182157	0.136544	0.12929	0.153928	0.141058
Blood assays	Mean reticulocyte volume	0.0816315	0.0723181	0.0659714	0.0796254	0.0857169
Blood assays	Mean sphered cell volume	0.1339	0.105964	0.115355	0.121667	0.138721
Blood assays	Immature reticulocyte fraction	0.197789	0.129253	0.112688	0.140125	0.134637
Blood assays	High light scatter reticulocyte percentage	0.243247	0.167207	0.157498	0.187969	0.186035
Blood assays	High light scatter reticulocyte count	0.271051	0.198013	0.184601	0.219925	0.209274
Urine assays	Microalbumin in urine	0.0495265	0.0221853	-0.0099385	0.02229	0.058959
Urine assays	Creatinine (enzymatic) in urine	0.314839	0.230978	0.266524	0.269199	0.292653
Urine assays	Potassium in urine	0.154257	0.12443	0.127252	0.137768	0.146466
Urine assays	Sodium in urine	0.254554	0.184558	0.202764	0.218807	0.232322
Blood assays	Albumin	0.176511	0.107671	0.130687	0.120508	0.167108
Blood assays	Alkaline phosphatase	0.236713	0.149043	0.174846	0.177245	0.225638
Blood assays	Alanine aminotransferase	0.277067	0.212667	0.24197	0.245221	0.254624
Blood assays	Apolipoprotein A	0.391141	0.297054	0.336822	0.34724	0.376379
Blood assays	Apolipoprotein B	0.153743	0.107502	0.110555	0.119598	0.1313
Blood assays	Aspartate aminotransferase	0.171867	0.135168	0.156095	0.151469	0.168079
Blood assays	Direct bilirubin	0.186007	0.123721	0.148372	0.147448	0.183084
Blood assays	Urea	0.241168	0.197543	0.22804	0.218009	0.236179
Blood assays	Calcium	0.100516	0.0443578	0.0706203	0.0783365	0.097081
Blood assays	Cholesterol	0.169688	0.111222	0.12375	0.13279	0.165704
Blood assays	Creatinine	0.549724	0.392853	0.485323	0.473811	0.528759
Blood assays	C-reactive protein	0.166684	0.104495	0.0990845	0.109484	0.134103
Blood assays	Cystatin C	0.378761	0.315478	0.350533	0.354617	0.365313
Blood assays	Gamma glutamyltransferase	0.221416	0.174034	0.181949	0.190574	0.203483
Blood assays	Glucose	0.150943	0.129503	0.133871	0.14067	0.150833
Blood assays	Glycated haemoglobin (HbA1c)	0.251313	0.227804	0.234191	0.233164	0.257463
Blood assays	HDL cholesterol	0.4331	0.340788	0.375305	0.390003	0.407056
Blood assays	IGF-1	0.292092	0.227659	0.251459	0.244099	0.282611
Blood assays	LDL direct	0.134369	0.0794592	0.0903611	0.100961	0.116724
Blood assays	Lipoprotein A	0.00270616	-0.0139792	0.000695587	-0.00585922	0.00198507
Blood assays	Oestradiol	0.196765	0.154356	0.140937	0.171545	0.181494
Blood assays	Phosphate	0.228466	0.153407	0.190594	0.200463	0.215277
Blood assays	Rheumatoid factor	0.0171252	-0.033266	-0.00203088	0.02129	-0.0252313
Blood assays	SHBG	0.448177	0.342513	0.395925	0.403766	0.406526
Physical measures	Heel quantitative ultrasound index (QUI), manual entry	0.302827	0.152147	0.140776	0.155668	0.321632
Blood assays	Total bilirubin	0.22224	0.145905	0.186326	0.185596	0.213899
Physical measures	Heel bone mineral density (BMD), manual entry	0.303783	0.146206	0.149925	0.161923	0.326712
Blood assays	Testosterone	0.804908	0.578589	0.728942	0.70346	0.782836
Physical measures	Heel Broadband ultrasound attenuation (BUA), manual entry	0.269872	0.143057	0.103629	0.153535	0.271477
Blood assays	Total protein	0.0931947	0.0644909	0.0903422	0.094741	0.0758888
Physical measures	Speed of sound through heel, manual entry	0.17	0.0506086	0.0549054	0.0393695	0.170834
Blood assays	Triglycerides	0.303593	0.238053	0.252813	0.268086	0.268549
Blood assays	Urate	0.544268	0.438178	0.493735	0.493812	0.518139
Blood assays	Vitamin D	0.120916	0.0871815	0.106164	0.111375	0.109985
Blood assays	Estimated sample dilution factor	0.0422751	0.0244783	0.00396034	0.0249101	0.0358577
Physical measures	Ankle spacing width	0.573325	0.472604	0.507139	0.521967	0.526923
Physical measures	Heel Broadband ultrasound attenuation, direct entry	0.32578	0.21578	0.218857	0.239269	0.330757
Physical measures	Speed of sound through heel	0.293076	0.157919	0.147486	0.170491	0.306443
Physical measures	Heel quantitative ultrasound index (QUI), direct entry	0.307021	0.176124	0.172729	0.193852	0.322503
Physical measures	Heel bone mineral density (BMD)	0.3094	0.181112	0.168895	0.197376	0.325232
Physical measures	Weight, manual entry	0	0	0	0	0
Lifestyle and environment	Age started smoking in current smokers	0.0234637	0.00817577	-0.00659571	0.00620736	0.0373334
Family history	Mother's age at death	0.228694	0.192035	0.203534	0.2059	0.21911
Sex-specific factors	Age started hormone-replacement therapy (HRT)	0.245708	0.196114	0.198665	0.205565	0.235109
Sex-specific factors	Age last used hormone-replacement therapy (HRT)	0.406993	0.350514	0.334279	0.354151	0.398337
Sex-specific factors	Age at menopause (last menstrual period)	0.140532	0.0963751	0.0841358	0.1113	0.10793
Health and medical history	Age angina diagnosed	0	0	0	0	0
Sociodemographics	Year immigrated to UK (United Kingdom)	0.377158	0.334548	0.346561	0.34136	0.371309
Lifestyle and environment	Age when last ate meat	0.296391	0.187612	0.183147	0.251952	0.266137
Sex-specific factors	Time since last menstrual period	0.0193806	0.0222561	0.00255599	0.00233598	0.0237696
Health and medical history	Age hay fever, rhinitis or eczema diagnosed	0.216263	0.188676	0.162047	0.189459	0.231079
Health and medical history	Age asthma diagnosed	0.280515	0.159152	0.178221	0.177682	0.252467
Sex-specific factors	Age of primiparous women at birth of child	0.170998	0.15501	0.0846691	0.139415	0.123028
Sex-specific factors	Age at bilateral oophorectomy (both ovaries removed)	0.264437	0.195405	0.190804	0.244913	0.254476
Health and medical history	Age heart attack diagnosed	0	0	0	0	0
Health and medical history	Age emphysema/chronic bronchitis diagnosed	0	0	0	0	0
Health and medical history	Age deep-vein thrombosis (DVT, blood clot in leg) diagnosed	0	0	0	0	0
Health and medical history	Age pulmonary embolism (blood clot in lung) diagnosed	0	0	0	0	0
Health and medical history	Age stroke diagnosed	0	0	0	0	0
Physical measures	Ankle spacing width (left)	0.568411	0.425358	0.486558	0.488364	0.521964
Physical measures	Heel broadband ultrasound attenuation (left)	0.335377	0.234693	0.234287	0.264264	0.334872
Physical measures	Speed of sound through heel (left)	0.293611	0.163667	0.162268	0.184323	0.305773
Physical measures	Heel quantitative ultrasound index (QUI), direct entry (left)	0.3104	0.195716	0.185332	0.218466	0.319327
Physical measures	Heel bone mineral density (BMD) (left)	0.307331	0.195602	0.195404	0.219389	0.320884
Physical measures	Heel bone mineral density (BMD) T-score, automated (left)	0.312217	0.199138	0.186383	0.216994	0.320453
Physical measures	Ankle spacing width (right)	0.550687	0.415888	0.474107	0.490024	0.504601
Physical measures	Heel broadband ultrasound attenuation (right)	0.341417	0.2353	0.253337	0.267177	0.343348
Physical measures	Speed of sound through heel (right)	0.299008	0.173693	0.181052	0.202335	0.308581
Physical measures	Heel quantitative ultrasound index (QUI), direct entry (right)	0.316511	0.196507	0.206634	0.229904	0.323939
Physical measures	Heel bone mineral density (BMD) (right)	0.318234	0.200688	0.211447	0.226281	0.3273
Physical measures	Heel bone mineral density (BMD) T-score, automated (right)	0.314847	0.198065	0.209065	0.228156	0.325178
Physical measures	Heel bone mineral density (BMD) T-score, manual entry (left)	0	0	0	0	0
Physical measures	Heel quantitative ultrasound index (QUI), manual entry (left)	0	0	0	0	0
Physical measures	Heel bone mineral density (BMD), manual entry (left)	0	0	0	0	0
Physical measures	Heel broadband ultrasound attenuation (BUA), manual entry (left)	0	0	0	0	0
Physical measures	Speed of sound through heel, manual entry (left)	0	0	0	0	0
Physical measures	Heel bone mineral density (BMD) T-score, manual entry (right)	0	0	0	0	0
Physical measures	Heel quantitative ultrasound index (QUI), manual entry (right)	0	0	0	0	0
Physical measures	Heel bone mineral density (BMD), manual entry (right)	0	0	0	0	0
Physical measures	Heel broadband ultrasound attenuation (BUA), manual entry (right)	0	0	0	0	0
Physical measures	Speed of sound through heel, manual entry (right)	0	0	0	0	0
Physical measures	Pulse rate	0.17137	0.115415	0.130808	0.13621	0.161351
Physical measures	Pulse wave reflection index	0.169294	0.129326	0.116158	0.142212	0.157781
Physical measures	Pulse wave peak to peak time	0.198535	0.189521	0.170545	0.198362	0.190677
Physical measures	Position of the pulse wave peak	0.242158	0.211253	0.210473	0.215828	0.249103
Physical measures	Position of pulse wave notch	0.184667	0.111065	0.137643	0.135952	0.155959
Physical measures	Position of the shoulder on the pulse waveform	0.248737	0.215853	0.210957	0.238618	0.244495
Physical measures	Duration of hearing test (left)	0.137181	0.125081	0.115587	0.139946	0.13884
Physical measures	Duration of hearing test (right)	0.164691	0.142556	0.130712	0.153658	0.158843
Cognitive function	Time to complete test	0.0677024	0.0392944	0.0477079	0.0594202	0.0683901
Cognitive function	Time to answer	0.247107	0.242187	0.274871	0.351036	0.303155
Cognitive function	Duration screen displayed	0.122898	0.0940839	0.117795	0.11417	0.110724
Psychosocial factors	Longest period of depression	-0.0113878	-0.00784433	-0.042442	0.00035415	0.00444155
Health and medical history	Age glaucoma diagnosed	0	0	0	0	0
Physical measures	Hand grip strength (left)	0.688458	0.494186	0.623372	0.600158	0.665718
Health and medical history	Age cataract diagnosed	0	0	0	0	0
Physical measures	Hand grip strength (right)	0.682904	0.496367	0.622773	0.6011	0.661666
Physical measures	Waist circumference	0.63674	0.519314	0.532999	0.572492	0.550824
Physical measures	Hip circumference	0.436092	0.30653	0.296333	0.35849	0.343091
Physical measures	Standing height	0.733513	0.57957	0.697272	0.690044	0.725231
Eye measures	Duration visual-acuity screen displayed (right)	0.0944605	0.0938881	0.0616531	0.100646	0.114937
Eye measures	Duration visual-acuity screen displayed (left)	0.138165	0.129813	0.130381	0.138965	0.145605
Eye measures	Duration at which refractometer first shown (right)	0.126193	0.112072	0.115917	0.129581	0.130798
Eye measures	Duration at which refractometer first shown (left)	0.102186	0.0903235	0.0991995	0.099413	0.117227
Physical measures	Seated height	0.579826	0.472474	0.560195	0.562975	0.571923
Eye measures	logMAR, final (right)	0.118367	0.102117	0.100857	0.107754	0.12755
Eye measures	logMAR, final (left)	0.104199	0.0834148	0.0673464	0.0945914	0.0930992
Eye measures	Intra-ocular pressure, corneal-compensated (right)	0.096438	0.0700196	0.0520242	0.0825057	0.10657
Eye measures	Intra-ocular pressure, Goldmann-correlated (right)	0.122031	0.0817532	0.0666894	0.0821587	0.112868
Eye measures	Corneal hysteresis (right)	0.114564	0.0411427	0.0384664	0.0591731	0.0828582
Eye measures	Corneal resistance factor (right)	0.11978	0.0254083	0.0393013	0.054068	0.0878221
Eye measures	Intra-ocular pressure, corneal-compensated (left)	0.131871	0.104595	0.0748111	0.113372	0.134247
Eye measures	Intra-ocular pressure, Goldmann-correlated (left)	0.127126	0.0921508	0.0813779	0.102041	0.12294
Eye measures	Corneal hysteresis (left)	0.132441	0.0688067	0.0458402	0.0759893	0.103313
Eye measures	Corneal resistance factor (left)	0.114033	0.0412997	0.0449423	0.0773013	0.0885256
Psychosocial factors	Longest period of unenthusiasm / disinterest	0.024782	0.013745	0.0132905	0.0493014	-0.00862291
Health and medical history	Age when diabetes-related eye disease diagnosed	0	0	0	0	0
Health and medical history	Age macular degeneration diagnosed	0	0	0	0	0
Health and medical history	Age other serious eye condition diagnosed	0	0	0	0	0
Physical measures	Maximum workload during fitness test	0.523733	0.272132	0.454072	0.431759	0.533553
Physical measures	Maximum heart rate during fitness test	0.183903	0.132531	0.127704	0.162873	0.172146
Physical measures	Number of trend entries	0.34518	0.251919	0.275446	0.272278	0.338518
Eye measures	Duration at which OCT screen shown (right)	0.0856861	0.0784271	0.0558036	0.0852117	0.101744
Eye measures	Duration at which OCT screen shown (left)	0.0903746	0.102638	0.0521227	0.0936748	0.113744
Lifestyle and environment	Age stopped smoking cigarettes (current cigar/pipe or previous cigarette smoker)	0	0	0	0	0
Sociodemographics	Length of time at current address	0.313729	0.280528	0.296728	0.29271	0.321852
Sociodemographics	Time employed in main current job	0.144575	0.121476	0.129588	0.13758	0.141275
Sociodemographics	Length of working week for main job	0.30606	0.218757	0.256013	0.259892	0.298968
Physical measures	Heel bone ultrasound T-score, manual entry	0.247433	0.130199	0.102434	0.142335	0.274925
Physical measures	Heel bone mineral density (BMD) T-score, automated	0.305742	0.179361	0.172287	0.194058	0.319967
Sociodemographics	Distance between home and job workplace	0.0355778	0.0155186	0.00465905	0.00905769	0.0419317
Lifestyle and environment	Duration of walks	0.0513074	0.0510233	0.0524033	0.0572928	0.0584498
Physical activity measurement	Overall acceleration average	0.316136	0.202473	0.231299	0.227608	0.282645
Physical activity measurement	Standard deviation of acceleration	0.29269	0.185727	0.219597	0.21309	0.271717
Physical activity measurement	Monday average acceleration	0.224852	0.125599	0.153781	0.151132	0.20351
Physical activity measurement	Tuesday average acceleration	0.21922	0.124095	0.145122	0.155702	0.192781
Physical activity measurement	Wednesday average acceleration	0.190315	0.10927	0.137417	0.140103	0.172244
Physical activity measurement	Thursday average acceleration	0.224666	0.13533	0.153738	0.161242	0.196293
Physical activity measurement	Friday average acceleration	0.235778	0.149326	0.162338	0.169747	0.207618
Physical activity measurement	Saturday average acceleration	0.261986	0.179476	0.192442	0.193898	0.238637
Physical activity measurement	Sunday average acceleration	0.261619	0.172304	0.185701	0.18972	0.228029
Physical activity measurement	Average acceleration 00:00 - 00:59	0.0783371	0.0284425	0.0181869	0.0447967	0.0454682
Physical activity measurement	Average acceleration 01:00 - 01:59	0.0565868	0.0144524	0.0201767	0.0199883	0.0336666
Physical activity measurement	Average acceleration 02:00 - 02:59	0.0205166	0.0110961	0.00319982	0.00167179	0.0203685
Physical activity measurement	Average acceleration 03:00 - 03:59	0.0245843	-0.00300944	-0.00868829	-0.00844307	0.0326565
Physical activity measurement	Average acceleration 04:00 - 04:59	0.0521317	0.0111951	0.00378972	0.0182126	0.0461909
Physical activity measurement	Average acceleration 05:00 - 05:59	0.0725295	0.0412258	0.020238	0.0383989	0.0586099
Physical activity measurement	Average acceleration 06:00 - 06:59	0.16382	0.138463	0.129278	0.137465	0.161147
Physical activity measurement	Average acceleration 07:00 - 07:59	0.195233	0.151492	0.138206	0.155632	0.184857
Physical activity measurement	Average acceleration 08:00 - 08:59	0.171861	0.117907	0.0877123	0.117087	0.133497
Physical activity measurement	Average acceleration 09:00 - 09:59	0.176579	0.11701	0.107661	0.125972	0.128714
Physical activity measurement	Average acceleration 10:00 - 10:59	0.17373	0.121224	0.113118	0.129757	0.140948
Physical activity measurement	Average acceleration 11:00 - 11:59	0.162269	0.0982644	0.0975922	0.118594	0.115276
Physical activity measurement	Average acceleration 12:00 - 12:59	0.142366	0.0899882	0.0682406	0.105125	0.107687
Physical activity measurement	Average acceleration 13:00 - 13:59	0.160463	0.100367	0.108994	0.124155	0.140742
Physical activity measurement	Average acceleration 14:00 - 14:59	0.162395	0.0867098	0.102046	0.116386	0.131916
Physical activity measurement	Average acceleration 15:00 - 15:59	0.185689	0.0903981	0.120109	0.113416	0.135873
Physical activity measurement	Average acceleration 16:00 - 16:59	0.195631	0.124152	0.153754	0.154293	0.162401
Physical activity measurement	Average acceleration 17:00 - 17:59	0.249554	0.183381	0.19493	0.199393	0.226927
Physical activity measurement	Average acceleration 18:00 - 18:59	0.270865	0.199758	0.21432	0.206801	0.249248
Physical activity measurement	Average acceleration 19:00 - 19:59	0.246957	0.189872	0.192286	0.196859	0.234103
Physical activity measurement	Average acceleration 20:00 - 20:59	0.233728	0.182821	0.181326	0.190144	0.22761
Physical activity measurement	Average acceleration 21:00 - 21:59	0.210303	0.166773	0.168258	0.176493	0.211828
Physical activity measurement	Average acceleration 22:00 - 22:59	0.171917	0.142656	0.141327	0.151743	0.173761
Physical activity measurement	Average acceleration 23:00 - 23:59	0.0770098	0.0390216	0.0485072	0.0571054	0.0718242
Physical activity measurement	No-wear time bias adjusted average acceleration	0.316439	0.199768	0.230976	0.226719	0.276673
Physical activity measurement	No-wear time bias adjusted acceleration standard deviation	0.295731	0.1914	0.225763	0.218297	0.278297
Physical activity measurement	No-wear time bias adjusted acceleration median	0.139536	0.0883468	0.0982736	0.0981144	0.120427
Physical activity measurement	No-wear time bias adjusted acceleration maximum	0.261056	0.178007	0.196504	0.185816	0.25607
Physical activity measurement	Fraction acceleration <= 1 milli-gravities	0.0383759	0.00696081	0.0106859	0.0263322	0.00411222
Physical activity measurement	Fraction acceleration <= 2 milli-gravities	0.0763824	0.0447997	0.0383273	0.0541555	0.0495204
Physical activity measurement	Fraction acceleration <= 3 milli-gravities	0.116863	0.0810735	0.0780064	0.0834009	0.0885739
Physical activity measurement	Fraction acceleration <= 4 milli-gravities	0.138026	0.0972483	0.103298	0.101623	0.119022
Physical activity measurement	Fraction acceleration <= 5 milli-gravities	0.153624	0.104882	0.113606	0.113313	0.134419
Physical activity measurement	Fraction acceleration <= 6 milli-gravities	0.166109	0.107714	0.119417	0.123866	0.144881
Physical activity measurement	Fraction acceleration <= 7 milli-gravities	0.174948	0.115361	0.128196	0.130153	0.15355
Physical activity measurement	Fraction acceleration <= 8 milli-gravities	0.181263	0.112936	0.134498	0.135901	0.157265
Physical activity measurement	Fraction acceleration <= 9 milli-gravities	0.183978	0.113912	0.14148	0.140044	0.159317
Physical activity measurement	Fraction acceleration <= 10 milli-gravities	0.19103	0.120178	0.143193	0.142331	0.166171
Physical activity measurement	Fraction acceleration <= 11 milli-gravities	0.193678	0.121181	0.14902	0.147542	0.165006
Physical activity measurement	Fraction acceleration <= 12 milli-gravities	0.196374	0.122173	0.152995	0.150426	0.164243
Physical activity measurement	Fraction acceleration <= 13 milli-gravities	0.202263	0.128166	0.157984	0.151034	0.167103
Physical activity measurement	Fraction acceleration <= 14 milli-gravities	0.204097	0.131855	0.160939	0.153905	0.172435
Physical activity measurement	Fraction acceleration <= 15 milli-gravities	0.208209	0.131922	0.160107	0.155011	0.173662
Physical activity measurement	Fraction acceleration <= 16 milli-gravities	0.214262	0.132916	0.164059	0.1572	0.173022
Physical activity measurement	Fraction acceleration <= 17 milli-gravities	0.216198	0.137337	0.167249	0.160029	0.178568
Physical activity measurement	Fraction acceleration <= 18 milli-gravities	0.217053	0.134692	0.168485	0.161662	0.176484
Physical activity measurement	Fraction acceleration <= 19 milli-gravities	0.218217	0.135003	0.170172	0.163309	0.176558
Physical activity measurement	Fraction acceleration <= 20 milli-gravities	0.219851	0.1359	0.170454	0.163004	0.180183
Physical activity measurement	Fraction acceleration <= 25 milli-gravities	0.229416	0.14834	0.183405	0.171731	0.190222
Physical activity measurement	Fraction acceleration <= 30 milli-gravities	0.240947	0.159014	0.189005	0.178906	0.19898
Physical activity measurement	Fraction acceleration <= 35 milli-gravities	0.249906	0.168281	0.195443	0.190433	0.207402
Physical activity measurement	Fraction acceleration <= 40 milli-gravities	0.254812	0.173291	0.201815	0.195482	0.222289
Physical activity measurement	Fraction acceleration <= 45 milli-gravities	0.26573	0.181495	0.205439	0.199248	0.233785
Physical activity measurement	Fraction acceleration <= 50 milli-gravities	0.269681	0.190071	0.212463	0.206347	0.245861
Physical activity measurement	Fraction acceleration <= 55 milli-gravities	0.280444	0.196436	0.218334	0.213733	0.261272
Physical activity measurement	Fraction acceleration <= 60 milli-gravities	0.286116	0.196499	0.223587	0.216144	0.267501
Physical activity measurement	Fraction acceleration <= 65 milli-gravities	0.290422	0.199881	0.22628	0.220011	0.266192
Physical activity measurement	Fraction acceleration <= 70 milli-gravities	0.293958	0.2007	0.228275	0.224009	0.270567
Physical activity measurement	Fraction acceleration <= 75 milli-gravities	0.300413	0.199112	0.232904	0.227696	0.275127
Physical activity measurement	Fraction acceleration <= 80 milli-gravities	0.301884	0.199131	0.235621	0.229472	0.278748
Physical activity measurement	Fraction acceleration <= 85 milli-gravities	0.306442	0.203473	0.238866	0.230472	0.28243
Physical activity measurement	Fraction acceleration <= 90 milli-gravities	0.308371	0.206741	0.23852	0.229421	0.283867
Physical activity measurement	Fraction acceleration <= 95 milli-gravities	0.311849	0.206964	0.240999	0.23103	0.287923
Physical activity measurement	Fraction acceleration <= 100 milli-gravities	0.316184	0.214388	0.241245	0.231853	0.293431
Physical activity measurement	Fraction acceleration <= 125 milli-gravities	0.326571	0.217824	0.2459	0.241024	0.305384
Physical activity measurement	Fraction acceleration <= 150 milli-gravities	0.328441	0.223326	0.247442	0.244447	0.30717
Physical activity measurement	Fraction acceleration <= 175 milli-gravities	0.327804	0.222139	0.2437	0.245142	0.307424
Physical activity measurement	Fraction acceleration <= 200 milli-gravities	0.317661	0.215905	0.234228	0.234699	0.29785
Physical activity measurement	Fraction acceleration <= 225 milli-gravities	0.306422	0.206589	0.224538	0.226846	0.28661
Physical activity measurement	Fraction acceleration <= 250 milli-gravities	0.296961	0.199463	0.215397	0.21874	0.276976
Physical activity measurement	Fraction acceleration <= 275 milli-gravities	0.293108	0.198373	0.212599	0.216873	0.275607
Physical activity measurement	Fraction acceleration <= 300 milli-gravities	0.285827	0.193609	0.207456	0.213445	0.269197
Physical activity measurement	Fraction acceleration <= 325 milli-gravities	0.281388	0.186792	0.203441	0.207158	0.261965
Physical activity measurement	Sample rate average	-0.0236055	-0.0236055	-0.0264294	-0.025784	-0.0236055
Physical activity measurement	Sample rate minimum	0.0111975	0.00475395	-0.00083248	0.0130976	0.000798427
Physical activity measurement	Sample rate maximum	-0.021592	-0.021592	0.00846829	0.00928107	-0.0035798
Physical activity measurement	Temperature average	0.0563518	0.0279217	0.00844726	0.0263792	0.0464935
Physical activity measurement	Temperature standard deviation	0.147644	0.0945756	0.0912498	0.1126	0.108442
Physical activity measurement	Temperature minimum	0.0198856	-0.00115574	-0.00533137	-0.0031443	0.0276573
Physical activity measurement	Temperature maximum	0.0429861	0.0334795	0.0124607	0.0297272	0.0306617
Lifestyle and environment	Duration of vigorous activity	0.0501669	0.00122565	0.0191639	0.0179491	0.0463268

## Sheet: Table 2-UKB disease
Disease Class	Disease Name	SSDiff	DTI+NODDI	SC	DTI+NODDI+SC	BigFLICA
Infectious and parasitic	Certain infectious and parasitic diseases	0.527153	0.538744	0.513869	0.554227	0.548137
Infectious and parasitic	Implicit bacterial Sepsis	0.602915	0.662747	0.573749	0.651598	0.646924
Infectious and parasitic	Intestinal infectious diseases	0.511254	0.533253	0.50458	0.512696	0.525215
Infectious and parasitic	Implicit Sepsis	0.581653	0.577783	0.55676	0.564577	0.642192
Infectious and parasitic	Other bacterial intestinal infections	0.494499	0.500421	0.512209	0.520196	0.515786
Infectious and parasitic	Explicit Sepsis	0.598886	0.561673	0.5448	0.556248	0.611646
Infectious and parasitic	Implicit viral Sepsis	0.518739	0.510715	0.552459	0.573027	0.622776
Infectious and parasitic	Diarrhoea and gastroenteritis of presumed infectious origin	0.50626	0.503541	0.500801	0.512306	0.510928
Infectious and parasitic	Other bacterial diseases	0.622813	0.57476	0.549994	0.61356	0.575144
Infectious and parasitic	Bacterial infection, other or unspecified	0.513782	0.458617	0.496319	0.478223	0.500908
Infectious and parasitic	Other septicaemia	0.574933	0.56563	0.584546	0.557009	0.622008
Infectious and parasitic	Viral infections characterized by skin and mucous membrane lesions	0.506619	0.511233	0.498921	0.508606	0.505706
Infectious and parasitic	Other viral diseases	0.507546	0.508405	0.495012	0.488957	0.515262
Infectious and parasitic	Other viral diseases, not elsewhere classified	0.503315	0.498313	0.486191	0.500827	0.510039
Infectious and parasitic	Mycoses	0.525559	0.545069	0.51457	0.525905	0.511863
Infectious and parasitic	Implicit fungal Sepsis	0.557847	0.549477	0.533225	0.529505	0.511576
Infectious and parasitic	Candidiasis	0.509958	0.502742	0.493558	0.500997	0.498456
Infectious and parasitic	Bacterial, viral and other infectious agents	0.531874	0.582697	0.520505	0.534436	0.567594
Infectious and parasitic	Streptococcus and staphylococcus as the cause of diseases classified to other chapters	0.50048	0.51279	0.509809	0.509444	0.50372
Infectious and parasitic	Other bacterial agents as the cause of diseases classified to other chapters	0.549472	0.565277	0.517897	0.525439	0.519853
Infectious and parasitic	Viral agents as the cause of diseases classified to other chapters	0.498906	0.511924	0.484141	0.511807	0.487675
Infectious and parasitic	Condition for Implicit Sepsis (Organ dysfunction codes)	0.611778	0.60981	0.565726	0.561707	0.573603
Neoplasms	Malignant neoplasm, wide definition for exclusion, excluding all cancers (controls excluding all cancers)	0.564604	0.557794	0.55125	0.558653	0.561434
Neoplasms	Neoplasms	0.531616	0.517889	0.524594	0.530543	0.526915
Neoplasms	Colon Squamous cell carcinoma, excluding all cancers (controls excluding all cancers)	0.523235	0.514538	0.472968	0.507874	0.548521
Neoplasms	Non-small cell lung cancer, adenocarcinoma, excluding all cancers (controls excluding all cancers)	0.501693	0.509368	0.523841	0.500392	0.485462
Neoplasms	Non-small cell lung cancer, squamous, excluding all cancers (controls excluding all cancers)	0.5039	0.529454	0.501092	0.501738	0.501339
Neoplasms	Non-small cell lung cancer, excluding all cancers (controls excluding all cancers)	0.511942	0.543365	0.5084	0.539013	0.539306
Neoplasms	Malignant melanoma of skin, excluding all cancers (controls excluding all cancers)	0.51894	0.510718	0.506493	0.520538	0.505492
Neoplasms	Other malignant neoplasms of skin (=non-melanoma skin cancer), excluding all cancers (controls excluding all cancers)	0.592252	0.60222	0.565004	0.610915	0.582212
Neoplasms	Squamous cell neoplasms and carcinomas of the skin, excluding all cancers (controls excluding all cancers)	0.591022	0.613197	0.602651	0.612995	0.624176
Neoplasms	Malignant neoplasm of breast, HER2-positive, excluding all cancers (controls excluding all cancers)	0.693546	0.605205	0.648723	0.660694	0.719838
Neoplasms	Malignant neoplasm of prostate, excluding all cancers (controls excluding all cancers)	0.791721	0.690001	0.709212	0.692322	0.738658
Neoplasms	Malignant neoplasm of bladder, excluding all cancers (controls excluding all cancers)	0.61927	0.535465	0.58274	0.582788	0.658106
Neoplasms	Secondary and unspecified malignant neoplasm of lymph nodes, excluding all cancers (controls excluding all cancers)	0.531151	0.516008	0.526122	0.523658	0.505196
Neoplasms	Secondary malignant neoplasm of respiratory and digestive organs, excluding all cancers (controls excluding all cancers)	0.54147	0.559155	0.568952	0.565637	0.556307
Neoplasms	Secondary malignant neoplasm of other and unspecified sites, excluding all cancers (controls excluding all cancers)	0.577008	0.584029	0.550551	0.589319	0.584069
Neoplasms	Non-Hodgkin lymphoma, all, excluding all cancers (controls excluding all cancers)	0.510822	0.507705	0.509315	0.516048	0.512495
Neoplasms	Malignant neoplasm, without specification of site, excluding all cancers (controls excluding all cancers)	0.480243	0.534228	0.53089	0.494058	0.559719
Neoplasms	Benign neoplasms	0.518031	0.522192	0.515588	0.523687	0.519099
Neoplasms	In situ neoplasms	0.531957	0.533123	0.507848	0.522284	0.523279
Neoplasms	Benign neoplasm of colon, rectum, anus and anal canal	0.54977	0.542778	0.540869	0.540793	0.543356
Neoplasms	Benign neoplasm: Caecum	0.547477	0.509696	0.535544	0.564648	0.515467
Neoplasms	Benign neoplasm: Ascending colon	0.600191	0.597816	0.549188	0.588275	0.567039
Neoplasms	Benign neoplasm: Transverse colon	0.557965	0.59205	0.551845	0.5614	0.601854
Neoplasms	Benign neoplasm: Descending colon	0.60364	0.551138	0.54056	0.523447	0.606406
Neoplasms	Benign neoplasm: Sigmoid colon	0.566054	0.520813	0.530266	0.534535	0.562077
Neoplasms	Benign neoplasm: Rectum	0.533088	0.519606	0.52299	0.531378	0.586891
Neoplasms	Benign lipomatous neoplasm	0.503844	0.502387	0.50561	0.504832	0.516382
Neoplasms	Melanocytic naevi	0.515306	0.503701	0.522067	0.510885	0.516335
Neoplasms	Other benign neoplasms of skin	0.501886	0.494804	0.500698	0.494077	0.505052
Neoplasms	Leiomyoma of uterus	0.714368	0.674623	0.707327	0.711358	0.696766
Blood	Diseases of the blood and blood-forming organs and certain disorders involving the immune mechanism	0.533248	0.566921	0.555138	0.541654	0.535302
Blood	Other and unspecified iron deficiency	0.521394	0.550743	0.518673	0.564519	0.553
Blood	Anaemia in chronic diseases classified elsewhere	0.52289	0.474146	0.567416	0.518165	0.477969
Blood	Other anaemias	0.528905	0.549776	0.552849	0.554266	0.551461
Blood	Other and unspecified anaemias	0.528905	0.549776	0.552849	0.554266	0.551461
Blood	Purpura and other haemorrhagic conditions	0.54209	0.520382	0.494405	0.513274	0.449366
Blood	Thrombocytopenia, unspecified	0.561251	0.511367	0.495153	0.475066	0.506519
Blood	Agranulocytosis	0.544481	0.529426	0.508949	0.508024	0.51968
Endocrine and metabolic	Endocrine, nutritional and metabolic diseases	0.654218	0.641915	0.579305	0.636912	0.638183
Endocrine and metabolic	Disorders of other endocrine glands	0.500114	0.505293	0.505125	0.501363	0.508466
Endocrine and metabolic	Other nutritional deficiencies	0.68092	0.567472	0.597029	0.63765	0.640817
Endocrine and metabolic	Metabolic disorders	0.673204	0.66418	0.645093	0.659524	0.666177
Endocrine and metabolic	Disorders of the thyroid gland	0.603735	0.582277	0.541563	0.556783	0.628012
Endocrine and metabolic	Hypothyroidism, other/unspecified	0.605179	0.557878	0.548886	0.545218	0.627309
Endocrine and metabolic	Thyrotoxicosis, other and/or unspecified	0.504787	0.526655	0.492238	0.491401	0.492025
Endocrine and metabolic	Other disorders of glucose regulation and pancreatic internal secretion	0.517499	0.483476	0.484546	0.522263	0.514529
Endocrine and metabolic	Type 1 diabetes	0.58343	0.600724	0.482861	0.584246	0.596272
Endocrine and metabolic	Type 1 diabetes without complications	0.605999	0.535298	0.523052	0.56646	0.565261
Endocrine and metabolic	Type 2 diabetes	0.662719	0.671423	0.628222	0.645874	0.705518
Endocrine and metabolic	Type 2 diabetes, definitions combined, including avohilmo	0.675925	0.721004	0.675659	0.679711	0.701469
Endocrine and metabolic	Type 2 diabetes, wide definition	0.685039	0.684708	0.628225	0.645298	0.701741
Endocrine and metabolic	Type 2 diabetes with ophthalmic complications	0.650247	0.597394	0.594185	0.579024	0.666049
Endocrine and metabolic	Type 2 diabetes without complications	0.674616	0.642891	0.633242	0.711091	0.703077
Endocrine and metabolic	Hypoglycaemia, other or unspecified	0.509231	0.47824	0.510633	0.50208	0.512885
Endocrine and metabolic	Disorders of parathyroid gland	0.522747	0.50023	0.499535	0.513339	0.509764
Endocrine and metabolic	Hyperparathyroidism	0.52073	0.538484	0.527081	0.529463	0.500627
Endocrine and metabolic	Vitamin deficiency	0.528161	0.536436	0.502124	0.521304	0.535588
Endocrine and metabolic	Deficiency of other B group vitamins	0.50956	0.500712	0.493799	0.55928	0.52979
Endocrine and metabolic	Vitamin D deficiency	0.473991	0.502289	0.491028	0.511789	0.514839
Endocrine and metabolic	Obesity	0.720303	0.609355	0.568189	0.595851	0.662708
Endocrine and metabolic	Obesity, other/unspecified	0.720701	0.610825	0.564077	0.597335	0.666828
Endocrine and metabolic	Disorders of lipoprotein metabolism and other lipidaemias	0.68476	0.631503	0.652848	0.668481	0.676676
Endocrine and metabolic	Hyperlipidaemia, other/unspecified	0.595643	0.588867	0.621311	0.564323	0.633249
Endocrine and metabolic	Pure hypercholesterolaemia	0.679331	0.637022	0.651752	0.666545	0.600787
Endocrine and metabolic	Disorders of mineral metabolism	0.562358	0.607415	0.583002	0.555899	0.57915
Endocrine and metabolic	Disorders of phosphorus metabolism and phosphatases	0.510213	0.519946	0.541463	0.534451	0.609818
Endocrine and metabolic	Disorders of magnesium metabolism	0.629916	0.574944	0.600417	0.551658	0.587761
Endocrine and metabolic	Disorders of calcium metabolism	0.561094	0.499987	0.535616	0.582917	0.560458
Endocrine and metabolic	Volume depletion	0.556444	0.625759	0.562494	0.568381	0.63936
Endocrine and metabolic	Other disorders of fluid, electrolyte and acid-base balance	0.670055	0.669464	0.615316	0.595828	0.669753
Endocrine and metabolic	Hyperosmolality and hypernatraemia	0	0	0	0	0
Endocrine and metabolic	Hypo-osmolality and hyponatraemia	0.691742	0.625734	0.609258	0.597846	0.68622
Endocrine and metabolic	Acidosis	0.57457	0.548658	0.523457	0.532087	0.54012
Endocrine and metabolic	Hyperkalaemia	0.526558	0.506728	0.529429	0.47337	0.573048
Endocrine and metabolic	Hypokalaemia	0.610225	0.587673	0.573431	0.590233	0.667304
Endocrine and metabolic	Fluid overload	0.510232	0.461538	0.488777	0.50965	0.589009
Endocrine and metabolic	Postprocedural endocrine and metabolic disorders, not elsewhere classified	0.495998	0.508285	0.542377	0.512337	0.583086
Circulatory system	Peripheral artery disease	0.530942	0.625451	0.563348	0.62829	0.636527
Circulatory system	Vascular dementia	0	0	0	0	0
Circulatory system	Transient ischemic attack	0.557091	0.634165	0.575705	0.64217	0.625039
Circulatory system	Cardiovascular diseases	0.6579	0.660795	0.633919	0.65727	0.660599
Circulatory system	Death due to cardiac causes	0.687969	0.690145	0.655522	0.687194	0.691169
Circulatory system	Rheumatic valve diseases	0.550198	0.594071	0.5747	0.587042	0.658666
Circulatory system	Hypertension, essential	0.698442	0.708194	0.666322	0.705347	0.705132
Circulatory system	Hypertension	0.697892	0.708303	0.666629	0.707239	0.705065
Circulatory system	Hypertensive heart and/or renal disease	0.529363	0.565908	0.50135	0.524239	0.624759
Circulatory system	Hypertensive Renal Disease	0	0	0	0	0
Circulatory system	Ischemic heart diseases	0.634305	0.672573	0.644887	0.593727	0.679163
Circulatory system	Angina pectoris	0.602019	0.66304	0.567475	0.591124	0.597779
Circulatory system	Unstable angina pectoris	0.680066	0.648076	0.546751	0.586153	0.669152
Circulatory system	Major coronary heart disease event excluding revascularizations	0.65891	0.611641	0.58265	0.601526	0.606249
Circulatory system	Myocardial infarction, with ST-elevation	0.623741	0.618539	0.644251	0.634063	0.626991
Circulatory system	Myocardial infarction, strict	0.659972	0.603356	0.588966	0.609953	0.610403
Circulatory system	Myocardial infarction, without ST-elevation	0.63757	0.583221	0.568773	0.616453	0.65025
Circulatory system	Myocardial infarction, unclassifiable	0.672535	0.565961	0.569852	0.642577	0.568638
Circulatory system	Coronary atherosclerosis	0.701082	0.683773	0.599991	0.681967	0.696518
Circulatory system	Pulmonary embolism	0.547461	0.518989	0.540886	0.543441	0.51812
Circulatory system	Venous thromboembolism	0.530726	0.561955	0.510706	0.56019	0.552348
Circulatory system	Secondary right heart disease	0.483587	0.538045	0.4821	0.470285	0.529571
Circulatory system	Other pulmonary heart/vessel disease	0.566774	0.512894	0.559941	0.522705	0.532791
Circulatory system	Hypertension, Pulmonary Arterial	0	0	0	0	0
Circulatory system	Non-rheumatic valve diseases	0.662541	0.602607	0.621064	0.64815	0.676351
Circulatory system	Other diseases of pericardium	0.545138	0.472972	0.536993	0.532063	0.535316
Circulatory system	Operations 2 for CAVS	0.685475	0.661933	0.602995	0.645891	0.69876
Circulatory system	Calcific aortic valvular stenosis, including rheumatic fever	0.638721	0.705594	0.621178	0.642937	0.688812
Circulatory system	Cardiomyopathy	0.500809	0.513119	0.512457	0.540169	0.583313
Circulatory system	AV-block	0.620484	0.58314	0.615896	0.632442	0.676479
Circulatory system	Left bundle-branch block	0.629961	0.594604	0.554709	0.643287	0.616671
Circulatory system	Conduction disorders	0.640814	0.583636	0.627234	0.584575	0.65473
Circulatory system	Right bundle-branch block	0.618351	0.567363	0.575967	0.57491	0.601447
Circulatory system	Cardiac arrest	0.460637	0.566623	0.543237	0.588438	0.652419
Circulatory system	Paroxysmal tachycardia	0.505072	0.495245	0.490314	0.497106	0.524283
Circulatory system	Atrial fibrillation and flutter	0.689977	0.622908	0.607483	0.609602	0.695419
Circulatory system	Other arrhythmias	0.542166	0.532499	0.513271	0.525926	0.581142
Circulatory system	Other or ill-defined heart diseases	0.606919	0.646558	0.582669	0.586281	0.658978
Circulatory system	Heart failure, strict	0.712954	0.699762	0.609891	0.700432	0.718075
Circulatory system	Cerebrovascular diseases	0.609331	0.706456	0.599025	0.637913	0.701625
Circulatory system	Stroke, including SAH	0.599728	0.68125	0.634957	0.680862	0.68141
Circulatory system	Stroke, excluding SAH	0.607954	0.694718	0.616767	0.675416	0.706053
Circulatory system	Ischaemic Stroke, excluding all haemorrhages	0.632995	0.713125	0.570648	0.708492	0.702732
Circulatory system	Other specified cerebrovascular diseases, other cerebrovascular disorders in diseases classified elsewhere	0.716766	0.724488	0.636547	0.715713	0.683196
Circulatory system	Sequelae of cerebrovascular disease	0.507133	0.567142	0.539929	0.595855	0.524386
Circulatory system	Diseases of arteries, arterioles and capillaries	0.563759	0.618717	0.588202	0.618559	0.609446
Circulatory system	Other diseases of arteries and capillaries	0.565427	0.629855	0.542243	0.614802	0.522389
Circulatory system	Atherosclerosis, excluding cerebral and coronary sclerosis	0.540818	0.538031	0.548984	0.561485	0.49566
Circulatory system	Aortic aneurysm	0.692424	0.611192	0.604984	0.651668	0.686629
Circulatory system	Abdominal aortic aneurysm (AAA)	0.711203	0.555576	0.621764	0.59432	0.684483
Circulatory system	Other peripheral vascular diseases	0.571291	0.540866	0.507611	0.537933	0.545995
Circulatory system	Phlebitis and thrombophlebitis (not including DVT)	0.55278	0.521813	0.521999	0.520832	0.534804
Circulatory system	DVT of lower extremities	0.53338	0.524064	0.525078	0.513467	0.504513
Circulatory system	Varicose veins	0.523043	0.515049	0.515303	0.508665	0.531931
Circulatory system	Other noninfective disorders of lymphatic vessels and lymph nodes	0.478483	0.54732	0.510088	0.574775	0.516682
Circulatory system	Hypotension	0.593095	0.547501	0.558365	0.56585	0.550276
Mental and behavioural	Psychiatric diseases	0.592073	0.588116	0.532871	0.543567	0.543028
Mental and behavioural	Dementia	0.820563	0.773472	0.717195	0.68192	0.759195
Mental and behavioural	Dementia in Alzheimer disease	0	0	0	0	0
Mental and behavioural	Dementia in other diseases classified elsewhere	0	0	0	0	0
Mental and behavioural	Unspecified dementia	0	0	0	0	0
Mental and behavioural	Delirium, not induced by alcohol and other psychoactive substances	0.674556	0.56825	0.665385	0.650767	0.699207
Mental and behavioural	Substance abuse, excluding more controls	0.55931	0.562554	0.547579	0.558421	0.555309
Mental and behavioural	Mental and behavioural disorders due to alcohol	0.594556	0.561176	0.573007	0.57302	0.588524
Mental and behavioural	Alcohol dependence	0.605617	0.496917	0.533149	0.605241	0.638116
Mental and behavioural	Mental and behavioural disorders due to tobacco	0.601229	0.553034	0.558216	0.579912	0.552387
Mental and behavioural	Mood disorders, excluding more controls	0.558373	0.540535	0.545635	0.545467	0.538046
Mental and behavioural	Depression	0.557352	0.543892	0.52339	0.580229	0.535888
Mental and behavioural	Depression or dysthymia	0.554042	0.541621	0.540375	0.543221	0.584688
Mental and behavioural	Anxiety disorders, excluding more controls	0.548142	0.563838	0.52409	0.541874	0.543947
Mental and behavioural	Phobic anxiety disorders	0.530895	0.492362	0.530663	0.555092	0.497698
Mental and behavioural	Other anxiety disorders	0.568486	0.53039	0.51646	0.527719	0.532272
Nervous system	Neurological diseases	0.548934	0.52536	0.535572	0.542694	0.54461
Nervous system	Systemic atrophies primarily affecting the central nervous system	0	0	0	0	0
Nervous system	Motor neuron disease	0	0	0	0	0
Nervous system	Extrapyramidal and movement disorders	0.602842	0.567057	0.619978	0.631089	0.561075
Nervous system	Parkinson's disease, excluding more controls	0.635928	0.615813	0.604445	0.611753	0.542294
Nervous system	Other extrapyramidal and movement disorders in other diseases	0.533786	0.498314	0.529598	0.493552	0.509201
Nervous system	Alzheimer disease, excluding more controls	0	0	0	0	0
Nervous system	Unspecific neurodegenerative disorder	0	0	0	0	0
Nervous system	Other and unspecified degenerative diseases of nervous system	0.620582	0.615351	0.64068	0.596302	0.558747
Nervous system	Episodal and paroxysmal disorders	0.550824	0.569998	0.523078	0.540465	0.525877
Nervous system	Epilepsy	0.536772	0.509945	0.521214	0.50902	0.511072
Nervous system	Migraine	0.582759	0.545168	0.547306	0.530346	0.548897
Nervous system	Other sleep disorders	0.68328	0.582977	0.551879	0.586894	0.636621
Nervous system	Sleep apnoea	0.714512	0.644655	0.566673	0.635415	0.638501
Nervous system	Nerve, nerve root and plexus disorders	0.561903	0.524974	0.517825	0.531849	0.536148
Nervous system	Other and unspecified nerve root and plexus disorders, also in other diseases	0.521027	0.50533	0.507766	0.503705	0.516671
Nervous system	Carpal tunnel syndrome	0.574161	0.546098	0.531232	0.52784	0.556743
Nervous system	Diabetic neuropathy	0	0	0	0	0
Nervous system	Polyneuropathies and other disorders of the peripheral nervous system	0.547022	0.559078	0.534867	0.596118	0.545822
Nervous system	Other and unspecified polyneuropathies, also in other diseases	0.577271	0.637226	0.55186	0.541946	0.569274
Nervous system	Cerebral palsy and other paralytic syndromes	0.517674	0.580862	0.532876	0.528236	0.531792
Nervous system	Hemiplegia	0.524311	0.54498	0.540601	0.562699	0.625949
Nervous system	Other neurological diseases	0.524471	0.532804	0.5172	0.522202	0.507476
Nervous system	Cerebral cysts	0.520274	0.516401	0.502513	0.494593	0.520199
Nervous system	Other disorders of nervous system	0.471846	0.463331	0.510534	0.518702	0.503169
Eye, adnexa, ear and mastoid process	Diabetic hypoglycemia	0.505542	0.512622	0.517617	0.4833	0.521438
Eye, adnexa, ear and mastoid process	Diabetic neuropathy	0	0	0	0	0
Eye, adnexa, ear and mastoid process	Other diabetes, wide definition	0.642887	0.642636	0.608228	0.674983	0.594805
Eye, adnexa, ear and mastoid process	Diseases of the eye and adnexa	0.661387	0.65599	0.629722	0.653985	0.658282
Eye, adnexa, ear and mastoid process	Diseases of the ear and mastoid process	0.54281	0.606712	0.551776	0.612463	0.595298
Eye, adnexa, ear and mastoid process	Disorders of eyelid, lacrimal system and orbit	0.585245	0.570733	0.542115	0.567628	0.538872
Eye, adnexa, ear and mastoid process	Other disorders of eyelid	0.574033	0.587056	0.537607	0.541524	0.548663
Eye, adnexa, ear and mastoid process	Other specified and unspecified disorders of eyelid	0.526063	0.52435	0.512732	0.51495	0.504695
Eye, adnexa, ear and mastoid process	Ptosis of eyelid	0.511959	0.53036	0.470975	0.521929	0.585466
Eye, adnexa, ear and mastoid process	Disorders of lacrimal system	0.590976	0.545073	0.529707	0.527478	0.567179
Eye, adnexa, ear and mastoid process	Disorders of sclera, cornea, iris and ciliary body	0.618406	0.649951	0.591406	0.649681	0.651998
Eye, adnexa, ear and mastoid process	Keratitis	0.652163	0.653957	0.58808	0.650385	0.646763
Eye, adnexa, ear and mastoid process	Other disorders of cornea	0.648351	0.667518	0.611963	0.620163	0.67401
Eye, adnexa, ear and mastoid process	Corneal degeneration	0.634844	0.619348	0.655524	0.595169	0.675973
Eye, adnexa, ear and mastoid process	Disorders of lens	0.70237	0.687534	0.612575	0.682731	0.695831
Eye, adnexa, ear and mastoid process	Senile cataract	0.633876	0.605019	0.584155	0.61713	0.620782
Eye, adnexa, ear and mastoid process	Other cataract	0.688275	0.600919	0.593642	0.595667	0.619713
Eye, adnexa, ear and mastoid process	Disorders of choroid and retina	0.609001	0.565526	0.615554	0.586394	0.642966
Eye, adnexa, ear and mastoid process	Retinal detachment with retinal break	0.511777	0.550509	0.523245	0.508473	0.539841
Eye, adnexa, ear and mastoid process	Other specified and unspecified retinal disorders	0.541065	0.588116	0.51517	0.566746	0.529203
Eye, adnexa, ear and mastoid process	Degeneration of macula and posterior pole	0.607261	0.601511	0.592526	0.619819	0.676158
Eye, adnexa, ear and mastoid process	Diabetic retinopathy	0.708398	0.657197	0.600628	0.603057	0.660974
Eye, adnexa, ear and mastoid process	Unspecified diabetic retinopathy	0.626984	0.622177	0.592857	0.642735	0.668227
Eye, adnexa, ear and mastoid process	Glaucoma	0.610141	0.596914	0.588796	0.594574	0.66522
Eye, adnexa, ear and mastoid process	Disorders of vitreous body and globe	0.554546	0.503191	0.572256	0.576029	0.502174
Eye, adnexa, ear and mastoid process	Other and unspecified glaucoma	0.66534	0.625473	0.597509	0.657009	0.621562
Eye, adnexa, ear and mastoid process	Glaucoma suspect	0.50981	0.522195	0.535743	0.5424	0.551856
Eye, adnexa, ear and mastoid process	Primary open-angle glaucoma	0.605234	0.692127	0.617918	0.649646	0.654042
Eye, adnexa, ear and mastoid process	Disorders of vitreous body	0.516803	0.49979	0.564465	0.541119	0.547302
Eye, adnexa, ear and mastoid process	Disorders of ocular muscles, binocular movement, accommodation and refraction	0.618704	0.57897	0.582943	0.584848	0.61926
Eye, adnexa, ear and mastoid process	Visual disturbances and blindness	0.522897	0.570627	0.552839	0.570692	0.5338
Eye, adnexa, ear and mastoid process	Other disorders of eye and adnexa	0.501378	0.533287	0.521961	0.529684	0.533303
Eye, adnexa, ear and mastoid process	Disorders of refraction and accommodation	0.580786	0.566166	0.546721	0.570194	0.586195
Eye, adnexa, ear and mastoid process	Myopia	0.554997	0.538579	0.557138	0.557326	0.537909
Eye, adnexa, ear and mastoid process	Astigmatism	0.608645	0.592286	0.586567	0.599061	0.604329
Eye, adnexa, ear and mastoid process	Visual disturbances	0.539026	0.526358	0.500524	0.51314	0.517478
Eye, adnexa, ear and mastoid process	Other and unspecified visual disturbances	0.5234	0.516278	0.508999	0.512387	0.493416
Eye, adnexa, ear and mastoid process	Visual impairment including blindness (binocular or monocular)	0.451207	0.596458	0.525191	0.568259	0.481099
Eye, adnexa, ear and mastoid process	Diseases of inner ear	0.522802	0.511013	0.502107	0.539319	0.525159
Eye, adnexa, ear and mastoid process	Other disorders of ear	0.606696	0.624836	0.567563	0.610208	0.61464
Eye, adnexa, ear and mastoid process	Other specified/unspecified hearing loss	0.654984	0.615011	0.570226	0.635841	0.638974
Respiratory system	Diseases of the respiratory system	0.550081	0.544736	0.520641	0.580628	0.540977
Respiratory system	Lung diseases due to external agents	0.640906	0.569697	0.608336	0.591376	0.534556
Respiratory system	Acute upper respiratory infections	0.556246	0.502559	0.503076	0.487276	0.476457
Respiratory system	Influenza and pneumonia	0.566263	0.554437	0.578691	0.543703	0.616763
Respiratory system	Viral pneumonia	0.509605	0.561323	0.504526	0.562844	0.540467
Respiratory system	Pneumonia, organism unspecified	0.605303	0.56786	0.573042	0.563863	0.627196
Respiratory system	Other acute lower respiratory infections	0.534869	0.570287	0.560948	0.579829	0.55765
Respiratory system	Unspecified acute lower respiratory infection	0.550058	0.547651	0.530452	0.533639	0.561193
Respiratory system	Other diseases of upper respiratory tract	0.539607	0.543713	0.513893	0.52766	0.533796
Respiratory system	Vasomotor and allergic rhinitis	0.505162	0.504708	0.493804	0.514471	0.499646
Respiratory system	Chronic sinusitis	0.540121	0.539909	0.520735	0.554807	0.558159
Respiratory system	Diseases of vocal cords and larynx+other diseases of upper respiratory tract, no elsewhere classified	0.558647	0.547303	0.495591	0.506177	0.544431
Respiratory system	Chronic lower respiratory diseases	0.537612	0.545136	0.531325	0.549182	0.530724
Respiratory system	Emphysema	0.557529	0.631495	0.527393	0.574972	0.592093
Respiratory system	Later onset COPD, excluding more controls	0.696485	0.742444	0.625377	0.74315	0.742964
Respiratory system	COPD (mode)	0.619155	0.679553	0.595677	0.61358	0.608732
Respiratory system	Asthma (only as main-diagnosis), excluding more controls	0.531979	0.57408	0.524147	0.533261	0.530293
Respiratory system	Asthma (diagnoses ohter than nonallergic)	0.532923	0.576848	0.522247	0.539128	0.531043
Respiratory system	Asthma, unspecified (mode), excluding more controls	0.532663	0.543715	0.519537	0.526118	0.532467
Respiratory system	Bronchiectasis	0.577322	0.583884	0.556099	0.539588	0.56765
Respiratory system	Pneumonitis due to solids and liquids	0.547628	0.570238	0.508605	0.567057	0.557275
Respiratory system	Other respiratory diseases principally affecting the interstitium	0.568278	0.59183	0.594236	0.535927	0.541855
Respiratory system	ILD, hospital admissions	0.586108	0.58322	0.585921	0.553553	0.535879
Respiratory system	Pleural effusion	0.570596	0.638063	0.565249	0.633736	0.626969
Respiratory system	Other diseases of pleura	0.576446	0.619905	0.55907	0.570819	0.630617
Respiratory system	Other diseases of the respiratory system	0.596957	0.609693	0.595084	0.596477	0.607987
Respiratory system	Pleural plaque	0.545478	0.616217	0.581848	0.642305	0.669825
Digestive system	Gastrointestinal diseases	0.569773	0.567534	0.546948	0.566543	0.555718
Digestive system	Diseases of oral cavity, salivary glands and jaws	0.503815	0.50626	0.500962	0.504327	0.506134
Digestive system	Dental caries	0.479904	0.4855	0.4936	0.48735	0.487912
Digestive system	Other disorders of teeth and supporting structures	0.498879	0.501619	0.494203	0.510922	0.487597
Digestive system	Other diseases of lip and oral mucosa	0.493645	0.512491	0.491805	0.47679	0.511236
Digestive system	Oral lichen ruber planus, including avohilmo	0.505072	0.505134	0.49682	0.497375	0.511072
Digestive system	Diseases of tongue	0.475517	0.512444	0.518437	0.556208	0.501727
Digestive system	Gastroduodenal ulcer	0.534382	0.520602	0.512221	0.528525	0.539256
Digestive system	Diseases of oesophagus, stomach and duodenum	0.578937	0.538135	0.532813	0.57555	0.568019
Digestive system	Oesophagitis	0.533812	0.544797	0.533084	0.553673	0.5308
Digestive system	Gastro-oesophageal reflux disease	0.542686	0.5384	0.51785	0.571942	0.540417
Digestive system	Other diseases of oesophagus	0.592445	0.579861	0.54859	0.574378	0.541797
Digestive system	Ulcer of oesophagus	0.621591	0.604845	0.560597	0.579995	0.576055
Digestive system	Oesophageal obstruction	0.515682	0.515787	0.495123	0.524407	0.520686
Digestive system	Barrett oesophagus	0.612628	0.581616	0.540369	0.554308	0.610619
Digestive system	Gastric ulcer	0.533136	0.513889	0.518446	0.517355	0.528938
Digestive system	Duodenal ulcer	0.526798	0.517051	0.521404	0.545451	0.525041
Digestive system	Chronic gastritis	0.528559	0.514735	0.504578	0.50432	0.514408
Digestive system	Other gastritis (incl. Duodenitis)	0.537872	0.524768	0.538254	0.557147	0.520658
Digestive system	Diseases of appendix	0.504908	0.503148	0.500652	0.495742	0.490725
Digestive system	Functional dyspepsia	0.518427	0.528966	0.522246	0.525483	0.506697
Digestive system	Other diseases of stomach and duodenum	0.551961	0.550805	0.564981	0.577529	0.551684
Digestive system	Colonic or urogenital fistula	0.514569	0.509014	0.530867	0.517592	0.506805
Digestive system	Acute appendicitis	0.511097	0.50597	0.509793	0.506564	0.50346
Digestive system	Hernia	0.566012	0.602113	0.599049	0.601766	0.612726
Digestive system	Inguinal hernia	0.762889	0.711864	0.706585	0.711304	0.747807
Digestive system	Umbilical hernia	0.623036	0.570289	0.572926	0.543838	0.62656
Digestive system	Ventral hernia	0.495322	0.497362	0.486672	0.498585	0.48812
Digestive system	Diaphragmatic hernia	0.543657	0.548792	0.573123	0.551641	0.549698
Digestive system	Noninfective enteritis and colitis	0.512923	0.532701	0.513201	0.529357	0.515961
Digestive system	Other diseases of intestines	0.539651	0.564049	0.555725	0.53755	0.560976
Digestive system	Ulcerative colitis (strict definition, all Crohn cases excluded)	0.50323	0.506042	0.490507	0.49587	0.525163
Digestive system	Ulcerative colitis	0.506667	0.502453	0.504282	0.49789	0.509493
Digestive system	Other noninfective gastroenteritis and colitis	0.508406	0.534344	0.5172	0.538514	0.520593
Digestive system	Vascular disorders of the intestines	0.564916	0.551992	0.550951	0.593019	0.541671
Digestive system	Paralytic ileus and intestinal obstruction	0.513744	0.519246	0.518063	0.519866	0.536747
Digestive system	Other or unspecified ileus, impaction or obstruction	0.50703	0.488261	0.538395	0.510441	0.524814
Digestive system	Diverticular disease of intestine	0.53584	0.548408	0.545291	0.552687	0.585001
Digestive system	Irritable bowel syndrome	0.538852	0.520498	0.531854	0.556989	0.533487
Digestive system	Other functional intestinal disorders	0.534594	0.558916	0.526051	0.53539	0.563819
Digestive system	Constipation	0.535224	0.557114	0.531585	0.554846	0.534644
Digestive system	Diseases of peritoneum	0.507309	0.496419	0.498811	0.508702	0.500823
Digestive system	Fissure and fistula of anal and rectal regions	0.55797	0.500583	0.5206	0.516471	0.521961
Digestive system	Other diseases of anus and rectum	0.522656	0.517503	0.513532	0.509465	0.513792
Digestive system	Other diseases of intestine	0.566761	0.53217	0.523399	0.534732	0.534061
Digestive system	Haemorrhoids and perianal venous thrombosis	0.498436	0.502741	0.505123	0.506786	0.502169
Digestive system	Other diseases of peritoneum	0.504441	0.510022	0.510661	0.520042	0.506533
Digestive system	Diseases of liver	0.560485	0.539306	0.498784	0.533561	0.561973
Digestive system	Other diseases of liver	0.546899	0.518881	0.515111	0.526786	0.530174
Digestive system	Disorders of gallbladder, biliary tract and pancreas	0.542125	0.573858	0.524305	0.538422	0.573755
Digestive system	Cholelithiasis	0.564477	0.56332	0.542419	0.537716	0.554948
Digestive system	Cholecystitis	0.531852	0.492968	0.515266	0.518995	0.509837
Digestive system	Other diseases of gallbladder	0.535244	0.490762	0.481972	0.486822	0.504601
Digestive system	Other diseases of biliary tract	0.508438	0.545289	0.558371	0.545574	0.449444
Digestive system	Acute pancreatitis	0.547244	0.528857	0.507907	0.494524	0.49153
Digestive system	Other diseases of pancreas	0.524554	0.515917	0.490459	0.508162	0.552089
Digestive system	Diseases of the digestive system	0.522093	0.527175	0.517728	0.518971	0.519692
Digestive system	Intestinal malabsorption	0.527697	0.513082	0.50069	0.528134	0.53166
Digestive system	Coeliac disease	0.510582	0.493503	0.518694	0.513084	0.506394
Digestive system	Postprocedural disorders of digestive system, not elsewhere classified	0.481516	0.491897	0.470521	0.474848	0.486302
Digestive system	Other diseases of the digestive system	0.513487	0.517284	0.503404	0.519729	0.510068
Digestive system	GI-bleeding	0.514149	0.516872	0.505973	0.523595	0.524817
Skin and subcutaneous tissue	Diseases of the skin and subcutaneous tissue	0.530831	0.531594	0.52595	0.518519	0.523184
Skin and subcutaneous tissue	Dermatitis and eczema	0.516034	0.514245	0.521439	0.516426	0.513368
Skin and subcutaneous tissue	Disorders of skin appendages	0.509819	0.502352	0.493377	0.488763	0.499943
Skin and subcutaneous tissue	Other disorders of skin and subcutaneous tissue	0.544744	0.549524	0.526158	0.549945	0.540698
Skin and subcutaneous tissue	Infections of the skin and subcutaneous tissue	0.542869	0.522701	0.525325	0.549278	0.530999
Skin and subcutaneous tissue	Cutaneous abscess, furuncle and carbuncle	0.501607	0.488472	0.478854	0.505137	0.486773
Skin and subcutaneous tissue	Cellulitis	0.571525	0.578994	0.521256	0.56545	0.531598
Skin and subcutaneous tissue	Other and unspecified local infections of skin and subcutaneous tissue	0.511635	0.484597	0.477185	0.491127	0.502459
Skin and subcutaneous tissue	Dermatitis	0.502941	0.521696	0.502773	0.527321	0.507673
Skin and subcutaneous tissue	Other and unspecified dermatitis	0.500754	0.521055	0.508047	0.503574	0.514868
Skin and subcutaneous tissue	Papulosquamous disorders	0.550835	0.525294	0.506127	0.512321	0.506032
Skin and subcutaneous tissue	Psoriasis	0.529182	0.518501	0.519818	0.506559	0.504984
Skin and subcutaneous tissue	Other and unspecified psoriasis	0.520907	0.502856	0.513895	0.505906	0.506368
Skin and subcutaneous tissue	Urticaria and erythema	0.519579	0.469826	0.493036	0.495298	0.542908
Skin and subcutaneous tissue	Radiation-related disorders of the skin and subcutaneous tissue	0.633412	0.583428	0.59884	0.621852	0.626179
Skin and subcutaneous tissue	Skin changes due to chronic exposure to nonionizing radiation	0.63675	0.61275	0.604495	0.619403	0.625507
Skin and subcutaneous tissue	Actinic keratosis	0.635377	0.600983	0.608413	0.626429	0.567457
Skin and subcutaneous tissue	Follicular cysts of skin and subcutaneous tissue	0.509461	0.5002	0.494353	0.484484	0.501003
Skin and subcutaneous tissue	Seborrhoeic keratosis	0.530004	0.530585	0.543141	0.531377	0.52068
Skin and subcutaneous tissue	Decubitus ulcer and pressure area	0.542702	0.539808	0.559701	0.528588	0.429116
Skin and subcutaneous tissue	Atrophic disorders of skin	0.522987	0.52932	0.537744	0.510259	0.515183
Skin and subcutaneous tissue	Ulcer of lower limb, not elsewhere classified	0	0	0	0	0
Skin and subcutaneous tissue	Other disorders of skin and subcutaneous tissue, not elsewhere classified	0.516015	0.506513	0.510207	0.511188	0.516792
Skin and subcutaneous tissue	Other and unspecified disorders of skin and subcutaneous tissue	0.518784	0.517989	0.508746	0.513572	0.51176
Musculoskeletal system	Diseases of the musculoskeletal system and connective tissue	0.587493	0.584185	0.562528	0.547587	0.58485
Musculoskeletal system	Arthropathies	0.550863	0.552419	0.535891	0.547997	0.582072
Musculoskeletal system	Soft tissue disorders	0.516401	0.527648	0.509552	0.5234	0.514386
Musculoskeletal system	Rheumatoid arthritis	0.544261	0.515218	0.544654	0.535056	0.518199
Musculoskeletal system	Polyarthropathies	0.563431	0.56585	0.558195	0.548485	0.55782
Musculoskeletal system	Arthrosis	0.607982	0.537437	0.578986	0.56036	0.585535
Musculoskeletal system	Gout	0.706238	0.656208	0.664926	0.658587	0.669687
Musculoskeletal system	Other specified/unspecified arthritis	0.562438	0.60638	0.554428	0.581187	0.563261
Musculoskeletal system	Polyarthrosis	0.575201	0.564422	0.53791	0.554608	0.547691
Musculoskeletal system	Coxarthrosis	0.556284	0.535897	0.536184	0.523335	0.52247
Musculoskeletal system	Coxarthrosis, primary	0.489406	0.476214	0.535174	0.472249	0.515446
Musculoskeletal system	Gonarthrosis	0.556513	0.562582	0.542235	0.562058	0.587552
Musculoskeletal system	Gonarthrosis,primary	0.566948	0.543583	0.528671	0.522857	0.554822
Musculoskeletal system	Other arthrosis	0.608712	0.559386	0.556942	0.557767	0.558689
Musculoskeletal system	Other joint disorders	0.512634	0.516088	0.495482	0.508717	0.523252
Musculoskeletal system	Other deformities of toe(s)	0.562318	0.537181	0.486379	0.519617	0.541257
Musculoskeletal system	Hallux valgus (acquired)	0.623785	0.557954	0.59757	0.614238	0.592236
Musculoskeletal system	Other hammer toe(s) (acquired)	0.630583	0.547427	0.541309	0.53995	0.567695
Musculoskeletal system	Internal derangement of knee	0.521004	0.517411	0.502214	0.502426	0.53236
Musculoskeletal system	Meniscus derangement	0.5234	0.511313	0.494963	0.489693	0.519577
Musculoskeletal system	Other specific joint derangements/joint disorders	0.524393	0.536061	0.502379	0.518377	0.517234
Musculoskeletal system	Systemic lupus erythematosus	0	0	0	0	0
Musculoskeletal system	Other systemic involvement of connective tissue	0.559635	0.551003	0.610835	0.592622	0.553662
Musculoskeletal system	Polymyalgia rheumatica	0.662089	0.566867	0.568536	0.657014	0.665421
Musculoskeletal system	Deforming dorsopathies	0.549654	0.553713	0.544345	0.543902	0.555182
Musculoskeletal system	Spondylopathies	0.587247	0.540079	0.531155	0.605244	0.555921
Musculoskeletal system	Dorsopathies	0.538755	0.53618	0.524638	0.522036	0.537973
Musculoskeletal system	Scoliosis	0.550128	0.516284	0.460394	0.463988	0.560889
Musculoskeletal system	Spondylolisthesis/Spondylolysis	0.558246	0.524939	0.536813	0.531753	0.577873
Musculoskeletal system	Other specified/unspecified inflammatory spondylopathies	0.509419	0.530349	0.478482	0.521221	0.577328
Musculoskeletal system	Spondylosis	0.612052	0.596184	0.570291	0.602636	0.606797
Musculoskeletal system	Spinal stenosis	0.562757	0.546835	0.559365	0.530011	0.531627
Musculoskeletal system	Other dorsopathies, not elsewhere classified	0.526901	0.522599	0.514224	0.521691	0.549993
Musculoskeletal system	Cervical disc disorders	0.518797	0.475113	0.512324	0.508997	0.486005
Musculoskeletal system	Other intervertebral disc disorders	0.561488	0.506719	0.512669	0.532568	0.525745
Musculoskeletal system	Lumbar disc prolapse	0.527295	0.514484	0.503694	0.508595	0.523869
Musculoskeletal system	Sciatica+with lumbago	0.515832	0.509425	0.529739	0.529155	0.511383
Musculoskeletal system	Other/unspecified dorsalgia	0.526257	0.516107	0.507261	0.511005	0.515057
Musculoskeletal system	Cervicalgia	0.50601	0.532222	0.537157	0.504855	0.517228
Musculoskeletal system	Low back pain	0.511195	0.505583	0.502559	0.510932	0.515562
Musculoskeletal system	Disorders of muscles	0.501166	0.500783	0.488712	0.494179	0.523136
Musculoskeletal system	Disorders of synovium and tendon	0.507362	0.510778	0.5145	0.505788	0.514049
Musculoskeletal system	Other/unspecified synovitis and tenosynovitis	0.501865	0.508497	0.506484	0.512127	0.504372
Musculoskeletal system	Trigger finger	0.510672	0.530001	0.503081	0.508992	0.527318
Musculoskeletal system	Ganglion	0.531516	0.510718	0.511925	0.507864	0.51389
Musculoskeletal system	Soft tissue disorders related to use, overuse and pressure	0.46818	0.482557	0.500698	0.486989	0.484697
Musculoskeletal system	Fibroblastic disorders	0.667667	0.64096	0.554873	0.634535	0.652875
Musculoskeletal system	Palmar fascial fibromatosis [Dupuytren]	0.625804	0.647121	0.635221	0.639129	0.611353
Musculoskeletal system	Shoulder lesions	0.522203	0.522264	0.508031	0.508249	0.52446
Musculoskeletal system	Rotator cuff syndrome	0.555942	0.519567	0.542342	0.546133	0.539813
Musculoskeletal system	Impingement syndrome of shoulder	0.538486	0.515205	0.493463	0.499629	0.512624
Musculoskeletal system	Other soft tissue disorders, not elsewhere classified	0.571476	0.535186	0.512293	0.535796	0.535343
Musculoskeletal system	Other specified/unspecified soft tissue disorders	0.503941	0.534512	0.517907	0.537014	0.517831
Musculoskeletal system	Pain in limb	0.515016	0.514288	0.503144	0.508748	0.519429
Musculoskeletal system	Fibromyalgia	0.641886	0.605006	0.586112	0.565078	0.59365
Musculoskeletal system	Osteoporosis	0.739648	0.605238	0.577176	0.640418	0.753225
Musculoskeletal system	Osteopathies and chondropathies	0.661779	0.577467	0.553552	0.63236	0.63077
Musculoskeletal system	Other disorders of bone density and structure	0.60315	0.55889	0.526802	0.556196	0.617488
Musculoskeletal system	Other disorders of bone	0.497085	0.515008	0.501017	0.509661	0.507556
Genitourinary system	Genitourinary diseases	0.587408	0.534983	0.551111	0.537554	0.555466
Genitourinary system	Diseases of male genital organs	0.796663	0.744597	0.739943	0.746775	0.794587
Genitourinary system	Renal tubulo-interstitial diseases	0.655057	0.580594	0.571857	0.580172	0.647234
Genitourinary system	Tubulo-interstitial nephritis, not specified as acute or chronic	0.500296	0.510057	0.523767	0.516143	0.517598
Genitourinary system	Other obstructive and reflux uropathy	0.520482	0.560664	0.527877	0.522257	0.522781
Genitourinary system	Hydronephrosis	0.582834	0.541758	0.537541	0.557994	0.545312
Genitourinary system	Acute renal failure	0.666292	0.610914	0.64226	0.601289	0.68031
Genitourinary system	Chronic kidney disease	0.622396	0.600491	0.634249	0.617422	0.652229
Genitourinary system	Unspecified kidney failure	0.542847	0.499341	0.562412	0.440145	0.607504
Genitourinary system	Urolithiasis	0.590477	0.550906	0.55518	0.550472	0.566066
Genitourinary system	Other disorders of kidney and ureter	0.553293	0.556317	0.551243	0.566453	0.599114
Genitourinary system	Calculus of kidney and ureter	0.537951	0.533052	0.583194	0.531902	0.533498
Genitourinary system	Other specified disorders of kidney and ureter	0.504806	0.494815	0.510743	0.490468	0.498197
Genitourinary system	Cyst of kidney	0.554063	0.550332	0.562823	0.567497	0.540291
Genitourinary system	Other diseases of urinary system	0.541768	0.536893	0.530855	0.543191	0.548334
Genitourinary system	Cystitis	0.519713	0.518566	0.508409	0.525528	0.531446
Genitourinary system	Other disorders of bladder	0.584804	0.598039	0.55905	0.600306	0.643064
Genitourinary system	Urethral stricture	0.53603	0.52143	0.513638	0.559189	0.594517
Genitourinary system	Other disorders of urethra and urinary system	0.548223	0.533646	0.543192	0.544789	0.553483
Genitourinary system	Hyperplasia of prostate	0.802764	0.751226	0.743081	0.742432	0.80014
Genitourinary system	Inflammatory diseases of prostate (prostatitis)	0.703121	0.642033	0.667112	0.655953	0.670425
Genitourinary system	Redundant prepuce, phimosis and paraphimosis	0.746928	0.588983	0.606485	0.604576	0.671653
Genitourinary system	Other disorders of penis	0.734297	0.603291	0.616203	0.639856	0.658816
Genitourinary system	Other disorders of male genital organs	0.740302	0.567578	0.623079	0.624706	0.719204
Genitourinary system	Disorders of breast	0.707116	0.593519	0.576294	0.575615	0.70385
Genitourinary system	Inflammatory diseases of female pelvic organs	0.707525	0.610289	0.613051	0.616782	0.688516
Genitourinary system	Noninflammatory disorders of female genital tract	0.763821	0.70659	0.709329	0.721008	0.760423
Genitourinary system	Female genital prolapse	0.711981	0.65467	0.667679	0.627677	0.743273
Genitourinary system	Ovarian cyst	0.702127	0.596284	0.676156	0.684768	0.652755
Genitourinary system	Polyp of the female genital tract	0.69635	0.60885	0.60696	0.627306	0.672732
Genitourinary system	Other noninflammatory disorders of uterus, except cervix	0.680167	0.590326	0.632453	0.623338	0.6588
Genitourinary system	Excessive, frequent and irregular menstruation	0.775981	0.698685	0.735577	0.734158	0.761922
Genitourinary system	Postmenopausal bleeding	0.706326	0.610702	0.63957	0.636682	0.709518
Neoplasms	Benign neoplasm: Colon, unspecified	0.498895	0.491522	0.489855	0.502485	0.516015
Ear and mastoid process	Diseases of middle ear and mastoid	0.51422	0.506702	0.534086	0.526441	0.522107
Respiratory system	Nasal polyp	0.626336	0.622765	0.545141	0.631207	0.704958
Respiratory system	Deviated nasal septum	0.527037	0.516889	0.517368	0.514376	0.530123
Respiratory system	Early onset COPD, excluding more controls	0.562636	0.579469	0.504817	0.5686	0.541947
Respiratory system	Asthma (mode)	0.531979	0.57408	0.524147	0.533261	0.530293
Digestive system	Ulcerative colitis (strict definition, require KELA, min 2 HDR)	0.506667	0.502453	0.504282	0.49789	0.509493
Genitourinary system	Other female pelvic inflammatory diseases	0.624236	0.636134	0.658696	0.613461	0.606831
Genitourinary system	Endometriosis	0.710824	0.599295	0.653542	0.653846	0.702958
Genitourinary system	Uterine polyps	0.675195	0.593642	0.592789	0.608432	0.670389
Genitourinary system	Irregular menses	0.744386	0.640895	0.642647	0.666969	0.722654
Genitourinary system	Menorrhagia	0.773322	0.703669	0.681628	0.675072	0.699122
Genitourinary system	Other abnormal uterine and vaginal bleeding	0.720348	0.610044	0.604179	0.646812	0.660437
Genitourinary system	Pain and other conditions associated with female genital organs and menstrual cycle	0.722796	0.637756	0.657167	0.672097	0.736486
Pregnancy, childbirth and the puerperium	Maternal care related to the fetus and amniotic cavity and possible delivery problems	0.874543	0.812059	0.822173	0.835743	0.825664
Pregnancy, childbirth and the puerperium	Complications of labour and delivery	0.87047	0.828482	0.812842	0.836403	0.868226
Pregnancy, childbirth and the puerperium	Pregnancy with abortive outcome	0.831816	0.80359	0.723312	0.797049	0.793922
Pregnancy, childbirth and the puerperium	Delivery, wide proxy	0.883149	0.833836	0.824481	0.837935	0.880175
Pregnancy, childbirth and the puerperium	Other maternal disorders predominantly related to pregnancy	0.853449	0.786064	0.804877	0.810602	0.828768
Pregnancy, childbirth and the puerperium	Labour and delivery complicated by fetal stress [distress]	0.85943	0.824618	0.79421	0.811088	0.820895
Pregnancy, childbirth and the puerperium	Perineal laceration during delivery	0.869676	0.832127	0.757303	0.831265	0.864264
Pregnancy, childbirth and the puerperium	Delivery	0.861113	0.757395	0.802456	0.810299	0.808899

## Sheet: Table 3-HCP
Name	SSDiff	DTI+NODDI	SC	BigFLICA
PicSeq_Unadj	0.0844271	0.0912395	0.108536	0.0753156
CardSort_Unadj	0.13013	0.155664	0.16009	0.0770063
Flanker_Unadj	0.153214	0.16951	0.0754209	0.151344
PMAT24_A_CR	0.226794	0.153216	0.226899	0.21783
ReadEng_Unadj	0.260679	0.232663	0.165017	0.232924
PicVocab_Unadj	0.343136	0.27589	0.19415	0.270587
ProcSpeed_Unadj	0.0865839	0.0998661	0.0685926	0.0523185
DDisc_AUC_40K	0.188145	0.0955475	0.0694814	0.171593
VSPLOT_TC	0.26324	0.174311	0.184083	0.190973
SCPT_SEN	-0.0919018	-0.147517	-0.147517	-0.087602
SCPT_SPEC	0.12129	0.0559078	-0.0636415	-0.015736
IWRD_TOT	0.116366	0.119844	0.0624817	0.0288306
ListSort_Unadj	0.148487	0.0312275	0.0927072	0.137611
MMSE_Score	0.0746428	0.0595639	0.117735	0.0571891
PSQI_Score	0.0586482	0.054755	0.0366997	0.0745847
Endurance_Unadj	0.320234	0.258904	0.274471	0.242802
GaitSpeed_Comp	0.0634199	0.00703229	0.123666	0.00935426
Dexterity_Unadj	0.176509	0.228319	0.130603	0.217042
Strength_Unadj	0.626174	0.583555	0.446795	0.607758
Odor_Unadj	0.0254474	0.0756341	-0.0203864	0.0548306
PainInterf_Tscore	0.0461911	0.0302761	0.0606529	-0.0135023
Taste_Unadj	0.161327	0.0736253	0.132125	0.120592
Mars_Final	-0.0790431	-0.0880305	-0.0942665	-0.105176
Emotion_Task_Face_Acc	-0.0782849	-0.097636	-0.0391231	-0.0538954
Language_Task_Math_Avg_Difficulty_Level	0.107492	0.108495	0.177634	0.0836251
Language_Task_Story_Avg_Difficulty_Level	0.2232	0.22952	0.149871	0.200995
Relational_Task_Acc	0.303613	0.172158	0.193881	0.243752
Social_Task_Perc_Random	0.00203053	-0.0675022	0.0362653	0.00708679
Social_Task_Perc_TOM	0.0643819	-0.0261506	0.0330456	0.0371514
WM_Task_Acc	0.295696	0.175686	0.20253	0.25433
NEOFAC_A	0.167906	0.217787	0.104239	0.162997
NEOFAC_O	0.102393	-0.0379848	0.054736	0.0487478
NEOFAC_C	0.146507	0.0801471	0.0136055	0.0985351
NEOFAC_N	0.0496714	0.09524	0.0491216	0.0794694
NEOFAC_E	0.00473801	-0.0378873	0.10479	0.0263742
ER40_CR	0.129319	0.00359721	0.047049	0.0025235
ER40ANG	0.0798761	0.0246033	0.0215231	0.0429033
ER40FEAR	0.0636431	-0.036561	0.0446335	0.0223557
ER40HAP	0.0152125	-0.00661913	-0.0269065	-0.0716531
ER40NOE	-0.00360182	-0.0151729	0.00082617	-0.0179467
ER40SAD	0.0453305	0.0972708	0.0558979	-0.0220709
AngAffect_Unadj	0.0871286	-0.052176	-0.0253767	0.0457111
AngHostil_Unadj	0.0396998	0.0649132	0.0190805	0.121367
AngAggr_Unadj	0.199446	0.212978	0.145033	0.216988
FearAffect_Unadj	0.0530042	-0.0414952	0.0250531	0.0125744
FearSomat_Unadj	-0.000755701	-0.0103845	0.0592812	-0.0150329
Sadness_Unadj	0.043333	-0.0315722	-0.037051	0.0610486
LifeSatisf_Unadj	0.126274	0.0930851	0.0860849	0.175599
MeanPurp_Unadj	0.137024	-0.0281451	0.0287998	0.0956489
PosAffect_Unadj	0.060148	0.0774036	-0.0467545	0.072737
Friendship_Unadj	-0.0227117	0.0167482	-0.0499945	-0.0317355
Loneliness_Unadj	0.0280348	-0.009658	0.0123684	-0.0108102
PercHostil_Unadj	0.034334	0.019437	0.0987601	0.0390174
PercReject_Unadj	0.0113912	0.0534639	0.033902	0.00953895
EmotSupp_Unadj	0.0865679	0.16362	0.0698895	0.166324
InstruSupp_Unadj	0.0181821	0.0122727	-0.0306556	0.0336992
PercStress_Unadj	0.0694042	0.0475841	0.0806955	0.081302
SelfEff_Unadj	-0.00469093	0.0015398	0.0254576	0.0792597

## Sheet: Table 4-ABCD
Name	SSDiff	DTI	SC
neurocog_intro_ipad_y	0.403059	0.347988	0.281051
neurocog_intro2_ipad_y	0.391453	0.298081	0.26503
pea_ravlt_sd_trial_i_tc	0.155778	0.0966297	0.158844
pea_ravlt_sd_trial_i_tr	0.00637164	-0.0128803	0.00131295
pea_ravlt_sd_trial_i_ti	0.0578372	0.0289494	0.0266868
pea_ravlt_sd_trial_ii_tc	0.156492	0.0674369	0.134912
pea_ravlt_sd_trial_ii_tr	0.0585905	0.0157882	-0.00283138
pea_ravlt_sd_trial_ii_ti	0.0591406	0.0325912	0.0318994
pea_ravlt_sd_trial_iii_tc	0.171471	0.0593426	0.15211
pea_ravlt_sd_trial_iii_tr	0.00915007	-0.0193454	-0.0148717
pea_ravlt_sd_trial_iii_ti	0.0628475	0.0517349	0.050919
pea_ravlt_sd_trial_iv_tc	0.167423	0.0574148	0.148769
pea_ravlt_sd_trial_iv_tr	0.0298912	-0.00800916	0.0338747
pea_ravlt_sd_trial_iv_ti	0.063965	0.0539971	0.0468372
pea_ravlt_sd_trial_v_tc	0.184192	0.0717537	0.142882
pea_ravlt_sd_trial_v_tr	0.0291473	0.0157768	-0.0109078
pea_ravlt_sd_trial_v_ti	0.0621871	0.024741	0.0582855
pea_ravlt_sd_listb_tc	0.135933	0.07496	0.119403
pea_ravlt_sd_listb_tr	-0.0191536	-0.000809981	0.00526178
pea_ravlt_sd_listb_ti	0.0708377	0.057798	0.0240701
pea_ravlt_sd_trial_vi_tc	0.1784	0.0904783	0.159715
pea_ravlt_sd_trial_vi_tr	0.00282015	-0.0155321	0.00519338
pea_ravlt_sd_trial_vi_ti	0.0703999	0.0618409	0.0658325
pea_ravlt_ld_trial_vii_tc	0.171795	0.12904	0.138709
pea_ravlt_ld_trial_vii_tr	-0.00468836	0.00103672	-0.00113702
pea_ravlt_ld_trial_vii_ti	0.101953	0.0929399	0.07718
snellen_va_y	0.144092	0.122118	0.116005
nihtbx_picvocab_uncorrected	0.33561	0.273882	0.300935
nihtbx_picvocab_agecorrected	0.304917	0.228946	0.272038
nihtbx_flanker_uncorrected	0.184909	0.0810653	0.127895
nihtbx_flanker_agecorrected	0.134644	0.0674599	0.0837388
nihtbx_list_uncorrected	0.234136	0.202843	0.209492
nihtbx_list_agecorrected	0.214178	0.197028	0.198106
nihtbx_cardsort_uncorrected	0.201535	0.0994171	0.168963
nihtbx_cardsort_agecorrected	0.158693	0.117625	0.114218
nihtbx_pattern_uncorrected	0.18078	0.117771	0.0973484
nihtbx_pattern_agecorrected	0.161896	0.0989866	0.0831403
nihtbx_picture_uncorrected	0.189182	0.116904	0.140515
nihtbx_picture_agecorrected	0.165358	0.137313	0.125954
nihtbx_reading_uncorrected	0.248941	0.200266	0.261407
nihtbx_reading_agecorrected	0.206722	0.169299	0.214697
nihtbx_fluidcomp_uncorrected	0.317312	0.19397	0.244263
nihtbx_fluidcomp_agecorrected	0.260285	0.136746	0.19588
nihtbx_cryst_uncorrected	0.34583	0.27254	0.319235
nihtbx_cryst_agecorrected	0.300385	0.238668	0.285371
nihtbx_totalcomp_uncorrected	0.376519	0.190017	0.317473
nihtbx_totalcomp_agecorrected	0.34439	0.273338	0.288775
nihtbx_picvocab_theta	0.333166	0.271705	0.302639
nihtbx_picvocab_itmcnt	0.0202874	0.043387	0.0439438
nihtbx_picvocab_fc	0.115188	0.0818608	0.109854
nihtbx_flanker_rawscore	0.0490699	0.02005	0.0336372
nihtbx_flanker_itmcnt	-0.0146452	-0.027907	-0.011799
nihtbx_flanker_cs	0.185998	0.0827733	0.129047
nihtbx_flanker_fc	0.0643147	0.0359761	0.0215489
nihtbx_list_rawscore	0.231524	0.202381	0.208946
nihtbx_list_itmcnt	0.158378	0.13351	0.155698
nihtbx_list_fc	0.0696609	0.0780657	0.0820914
nihtbx_cardsort_rawscore	0.122286	0.0881603	0.0757011
nihtbx_cardsort_cs	0.207168	0.117638	0.174688
nihtbx_cardsort_fc	0.0930667	0.0492673	0.0670902
nihtbx_pattern_rawscore	0.181061	0.142667	0.0962254
nihtbx_pattern_itmcnt	0.185365	0.115467	0.0948331
nihtbx_pattern_cs	0.184381	0.134569	0.110864
nihtbx_pattern_fc	0.127315	0.099054	0.0595572
nihtbx_picture_rawscore	0.185897	0.132067	0.136945
nihtbx_picture_theta	0.184745	0.110551	0.14121
nihtbx_picture_itmcnt	-0.0054602	-0.0193376	-0.0177423
nihtbx_picture_cs	0.17916	0.134598	0.144843
nihtbx_picture_fc	0.0536331	0.048582	0.0201234
nihtbx_reading_theta	0.248665	0.195708	0.264852
nihtbx_reading_itmcnt	0.0303192	0.044349	0.0386669
nihtbx_reading_fc	0.104812	0.113906	0.133856
nihtbx_fluidcomp_fc	0.130783	0.118397	0.0938096
nihtbx_cryst_fc	0.12737	0.1322	0.141962
nihtbx_totalcomp_fc	0.171035	0.135185	0.142423
pea_wiscv_trs	0.240022	0.171927	0.189365
pea_wiscv_tss	0.22727	0.16489	0.188235
lmt_run	-0.0351036	-0.0351036	-0.00896409
lmt_scr_perc_correct	0.209896	0.132326	0.179775
lmt_scr_perc_wrong	0.181962	0.113986	0.150737
lmt_scr_num_correct	0.211655	0.133193	0.181833
lmt_scr_num_wrong	0.183581	0.121693	0.151978
lmt_scr_num_timed_out	0.0218411	0.0133455	0.0391319
lmt_scr_rt_wrong	0.0987183	0.0962042	0.0629116
lmt_scr_efficiency	0.141347	0.117115	0.123604
lmt_scr_correct_num_stimtype1	0.0076958	0.0318778	0.0350743
lmt_scr_correct_num_stimtype2	0.00529726	0.0359274	0.0250936
lmt_scr_correct_num_stimtype3	0.205577	0.153962	0.152018
lmt_scr_correct_num_stimtype4	0.197829	0.14224	0.163583
lmt_scr_correct_num_stimtype5	0.114528	0.0628486	0.0918088
lmt_scr_correct_num_stimtype6	0.112313	0.053936	0.0912754
lmt_scr_correct_num_stimtype7	0.0962881	0.061904	0.0967547
lmt_scr_correct_num_stimtype8	0.0629975	0.0668963	0.0541306
lmt_scr_wrong_num_stimtype1	0.000472535	0.0327976	0.0376056
lmt_scr_wrong_num_stimtype2	-0.00771629	0.0210028	0.0258957
lmt_scr_wrong_num_stimtype3	0.203339	0.16225	0.155838
lmt_scr_wrong_num_stimtype4	0.189118	0.12813	0.151047
lmt_scr_wrong_num_stimtype5	0.102108	0.0626998	0.0928849
lmt_scr_wrong_num_stimtype6	0.104182	0.0671133	0.103827
lmt_scr_wrong_num_stimtype7	0.0533293	0.0512374	0.0697992
lmt_scr_wrong_num_stimtype8	0.0334026	0.0477708	0.0252801
lmt_scr_tout_num_stimtype1	0.00746044	0.0175169	0.0315538
lmt_scr_tout_num_stimtype2	0.021109	0.017911	0.00227989
lmt_scr_tout_num_stimtype3	0.00718734	-0.00967581	0.011561
lmt_scr_tout_num_stimtype4	-0.0102222	-0.0172366	-0.0202788
lmt_scr_tout_num_stimtype5	-0.0258109	-0.0112662	-0.00061375
lmt_scr_tout_num_stimtype6	-0.034094	0.00158701	-0.0194553
lmt_scr_tout_num_stimtype7	0.00705431	0.0295205	0.0490972
lmt_scr_tout_num_stimtype8	0.0331702	0.0383503	-0.0027406
ehi1b	0.0445893	0.0348238	0.0515349
ehi2b	0.0287038	0.0264373	0.0274687
ehi3b	0.0569233	0.0421942	0.0524054
ehi4b	0.0571366	0.00930289	0.0449889
ehi_y_ss_scoreb	0.0512143	0.0235385	0.0346054
cash_choice_task	0.012949	0.0115178	0.0383235
birth_weight_lbs	0.486444	0.314566	0.339079
birth_weight_oz	-0.0219384	-0.026327	-0.00222589
devhx_3_p	0.277037	0.188943	0.255286
devhx_4_p	0.168609	0.0970404	0.180715
devhx_5_p	0.029049	0.00235827	-0.0193984
devhx_6_p	0.0553332	0.0270814	0.0491106
devhx_7_p	0.0893626	0.0575223	0.0507235
devhx_8_prescript_med	0.00493443	0.0296601	0.0108492
devhx_8_tobacco	0.0651874	0.0333108	0.0500136
devhx_8_alcohol	0.0262233	0.0269367	0.0406197
devhx_8_alchohol_max	0.0402126	-0.00254003	0.00641546
devhx_8_alchohol_avg	0.0124148	-0.0636715	0.0303837
devhx_8_marijuana	0.0687976	0.0158024	0.05011
devhx_8_coc_crack	0.0147285	0.0128509	0.0310106
devhx_8_her_morph	0.0338724	0.0279057	0.0378055
devhx_8_oxycont	0.0510641	0.0354728	0.0582617
devhx_8_other_drugs	0.0613725	0.0370614	0.05315
devhx_9_prescript_med	0.0113446	0.0322871	0.0460058
devhx_9_tobacco	0.0701596	0.0249963	0.0602176
devhx_9_alcohol	0.0691403	0.0379341	0.0522868
devhx_9_marijuana	0.0718013	0.0452809	0.0435762
devhx_9_coc_crack	0.0344199	0.013745	0.0454325
devhx_9_her_morph	0.0469144	0.0424946	0.0624577
devhx_9_oxycont	0.0471116	0.0209288	0.0624047
devhx_9_other_drugs	0.0432766	0.0322157	0.0409469
devhx_10	0.0216079	0.0375842	0.041353
devhx_caffeine_11	0.0455265	0.0355847	0.0495407
devhx_10a3_p	0.0782652	0.0326167	0.0658917
devhx_10b3_p	0.0849403	0.0496201	0.0438254
devhx_10c3_p	0.0691695	0.0442827	0.0484481
devhx_10d3_p	0.0721735	0.0425376	0.0355405
devhx_10e3_p	0.0468982	0.0341244	0.0383038
devhx_10f3_p	0.0716	0.046865	0.0538019
devhx_10g3_p	0.0634612	0.0450017	0.0413343
devhx_10h3_p	0.0331862	0.0317821	0.0440588
devhx_10i3_p	0.0685848	0.0254085	0.0283815
devhx_10j3_p	0.0469757	0.0097535	0.0286746
devhx_10k3_p	0.0642982	0.0300434	0.0381251
devhx_10l3_p	0.0838868	0.0299138	0.0414868
devhx_10m3_p	0.0693773	0.0230256	0.0430431
devhx_11_p	0.121529	0.108263	0.112486
devhx_12a_p	0.0104553	-0.00438197	0.00368276
devhx_13_3_p	0.0563395	0.0160579	0.0171533
devhx_14a3_p	0.0267282	0.00564359	0.0301468
devhx_14b3_p	0.0115965	0.0124583	0.0357637
devhx_14c3_p	0.0311922	0.00944245	0.0553734
devhx_14d3_p	0.0465429	0.0279451	0.0389784
devhx_14e3_p	0.01339	0.00338601	0.00638032
devhx_14f3_p	0.0250701	0.0252404	0.0458802
devhx_14g3_p	0.0114813	0.0118485	0.0342729
devhx_14h3_p	0.0176698	0.00896335	0.0187033
devhx_15	0.0486107	-0.0495824	0.0221312
devhx_16_p	-0.0348356	-0.0327872	-0.0273187
devhx_17_p	-0.0034911	-0.0264849	-0.0264849
devhx_18_p	0.233854	0.173773	0.158947
devhx_19a_p	-0.00334212	0.0357973	-0.00406396
devhx_19b_p	-0.0273382	-0.0273382	-0.0273382
devhx_19c_p	-0.0368658	-0.0368658	-0.0368658
devhx_19d_p	0.0581601	-0.00220472	0.031386
devhx_20_p	0.0208992	-0.00745916	0.00265078
devhx_21_p	0.00350924	0.000857755	0.00147047
devhx_22_3_p	-0.0197352	0.0137101	-0.000702404
devhx_23b_p	-0.0646813	-0.0859026	-0.0613709
devhx_ss_8_cigs_per_day_p	0.11486	0.0691132	0.0782142
devhx_ss_8_alcohol_max_p	0.0748163	0.0700227	0.0760929
devhx_ss_8_alcohol_avg_p	0.0435475	0.0108834	0.0546753
devhx_ss_8_alcohol_effects_p	0.0500282	0.0469176	0.0337631
devhx_ss_8_marijuana_amt_p	0.0302142	0.0167957	0.0353815
devhx_ss_8_coc_crack_amt_p	-0.0212811	-0.00698059	-0.0203477
devhx_ss_8_her_morph_amt_p	0	0	0
devhx_ss_8_oxycont_amt_p	-0.0101261	-0.0275306	-0.0275306
devhx_ss_9_cigs_per_day_p	0.0698945	0.0305286	0.0661594
devhx_ss_9_alcohol_max_p	-0.0234864	-0.0318106	-0.0318106
devhx_ss_9_alcohol_avg_p	-0.0355304	-0.0355304	-0.0355304
devhx_ss_9_alcohol_effects_p	-0.0251933	-0.0240687	-0.0251933
devhx_ss_9_marijuana_amt_p	0.0147391	-0.0181333	-0.010959
devhx_ss_9_coc_crack_amt_p	-0.033463	-0.033463	0
devhx_ss_9_her_morph_amt_p	0	0	0
devhx_ss_9_oxycont_amt_p	0	0	0
devhx_ss_12_p	-0.013815	0.00551967	-0.0303404
pds_ht2_y	0.0592535	0.0344525	0.0547403
pds_skin2_y	0.0114195	-0.0195056	0.020091
pds_bdyhair_y	0.0561461	0.0195206	0.0261237
pds_f4_2_y	0.0912426	0.036914	0.0472239
pds_f5_y	0.0154004	0.0663132	0.039251
pds_m4_y	-0.0168855	0.0266819	-0.0101746
pds_m5_y	0.000867828	-0.0189652	-0.0120162
pds_y_ss_male_category	0.104629	0.112551	0.0286038
pds_y_ss_male_cat_nm	0.0186538	0.0290747	0.00580402
pds_y_ss_female_category	0.271824	0.163111	0.13727
pds_y_ss_female_cat_nm	0.0785876	0.0847814	0.0383555
pds_y_ss_female_cat_2_nm	0.0717044	0.0639764	0.0348794
pds_y_ss_female_category_2	0.268807	0.189679	0.118927
pds_y_ss_male_cat_2	0.0804788	0.111576	0.0350508
pds_y_ss_male_cat_2_nm	0.00615918	0.0333751	0.0330797
sleepdisturb1_p	0.262898	0.215727	0.214432
sleepdisturb2_p	0.0799181	0.0301686	0.0308464
sleepdisturb3_p	0.0621128	0.0621563	0.0480798
sleepdisturb4_p	0.0767941	0.0869867	0.0388598
sleepdisturb5_p	0.0387684	0.0289413	0.0335757
sleepdisturb6_p	0.0163306	-0.00816835	0.0277796
sleepdisturb7_p	0.0104408	0.0281999	-0.00784464
sleepdisturb8_p	-0.0211419	0.0222858	0.0247921
sleepdisturb9_p	0.0206846	0.029377	0.013317
sleepdisturb10_p	0.029725	0.0050475	0.0217952
sleepdisturb11_p	0.0340231	-0.0105511	0.029235
sleepdisturb12_p	0.0451758	0.0359448	0.047703
sleepdisturb13_p	0.050075	0.0039201	0.0236639
sleepdisturb14_p	0.0282071	-0.0127764	-0.043207
sleepdisturb15_p	0.144434	0.107717	0.106907
sleepdisturb16_p	0.0354922	0.0332173	0.0353891
sleepdisturb17_p	-0.00354217	0.00282692	0.00938248
sleepdisturb18_p	0.0357926	0.0418136	0.0292174
sleepdisturb19_p	0.00233012	0.00275429	0.00687669
sleepdisturb20_p	-0.00116217	-0.0159386	-0.0019797
sleepdisturb21_p	0.0117026	0.0208024	0.0361395
sleepdisturb22_p	0.063691	0.0369029	0.045132
sleepdisturb23_p	0.0288598	0.0318947	-0.00456819
sleepdisturb24_p	0.000946374	0.000216489	0.0202252
sleepdisturb25_p	0.0526724	0.0363458	0.0359235
sleepdisturb26_p	0.0991927	0.0741556	0.0682857
sds_p_ss_dims	0.104802	0.0575063	0.0617893
sds_p_ss_sbd	0.156204	0.111467	0.0558467
sds_p_ss_da	0.0154528	0.00167151	0.00698961
sds_p_ss_swtd	0.0489199	0.0242376	0.0215234
sds_p_ss_swtd_nm	-0.0224412	-0.0224412	-0.0224412
sds_p_ss_does	0.0706985	0.0456179	0.0502567
sds_p_ss_does_nm	0	0	-0.0240245
sds_p_ss_shy	0.0419221	0.0421744	0.0455566
sds_p_ss_total	0.100045	0.0568728	0.0683445
sds_p_ss_total_nm	-0.0239923	-0.0239923	-0.0239923
anthro_1_height_in	0.454056	0.24397	0.186555
anthro2heightin	0.449179	0.233877	0.191706
anthroheightcalc	0.448761	0.250352	0.192712
anthroweight1lb	0.650118	0.258007	0.298919
anthroweight2lb	0.651416	0.215223	0.300022
anthroweightcalc	0.650524	0.266822	0.300298
anthro_waist_cm	0.620081	0.327207	0.299783
saip2_dance_nyr	0.0224125	-0.0159057	-0.0178448
saip2_dance_nmonth	0.0181577	-0.014139	0.0128625
saip2_dance_perwk	-0.0384598	-0.00386464	-0.0634794
saip2_dance_tspent	-0.00263367	0.00428253	-0.0766618
saip2_base_nyr	-0.02551	-0.0486528	-0.0268783
saip2_base_nmonth	-0.0218123	-0.0394006	-0.0371735
saip2_base_perwk	-0.0478567	-0.0723063	-0.0740398
saip2_base_tspent	-0.0112333	-0.0323472	-0.00612126
saip2_basket_nyr	0.0362109	-0.00332932	-0.000783625
saip2_basket_nmonth	-0.000611683	0.0442414	0.00217244
saip2_basket_perwk	0.0460755	-0.0627403	-0.0627403
saip2_basket_tspent	0.0506757	0.0441932	-0.0105626
saip2_gym_nyr	0.00811066	0.0166088	-0.061407
saip2_gym_nmonth	-0.0580823	-0.0444704	-0.0444704
saip2_gym_perwk	-0.0410655	-0.0368399	-0.0427273
saip2_gym_tspent	0.018448	-0.0189669	-0.0299519
saip2_soc_nyr	0.0840401	0.0514609	0.071281
saip2_soc_nmonth	0.030794	0.0467275	0.0392348
saip2_soc_perwk	-0.000290121	0.0378649	0.0151369
saip2_soc_tspent	0.0276075	0.0296941	0.00387598
saip2_wpolo_nyr	0.0586654	0.00982099	0.00234312
saip2_wpolo_nmonth	0.073991	0.00943254	0.0099577
saip2_wpolo_perwk	0.0108304	0.0297065	-0.0615642
saip2_wpolo_tspent	-0.00177144	0.00414334	0.0454065
saip2_music_nyr	0.0329752	0.0749996	-0.000281595
saip2_music_nmonth	0.0310681	0.0175235	0.0338706
saip2_music_perwk	-0.00343521	0.00879108	-0.0497583
saip2_music_tspent	0.0194488	0.0518433	0.0369341
saip2_art_nyr	-0.0260074	0.0378369	0.0404968
sai_p_lmusic_2	0.0957948	0.0447899	0.0718973
sai_p_lmusic_hours	0.0571533	0.0297377	0.00839483
sai_p_read_years	0.0789612	0.0802655	0.0405595
sai_p_read_hours	0.0236952	0.00225913	-0.0394438
sai_ss_dance_nyr_p	0.0361705	0.00745432	0.0099502
sai_ss_dance_nmonth_p	0.000341921	-0.0204499	-0.0118346
sai_ss_dance_perwk_p	-0.0171237	-0.00676525	-0.0245876
sai_ss_dance_tspent_p	-0.0112489	0.00886307	-0.0273793
sai_ss_base_nyr_p	-0.0033738	-0.0206509	-0.0333764
sai_ss_base_nmonth_p	-0.024456	-0.024456	-0.024456
sai_ss_base_perwk_p	-0.022573	-0.0274207	-0.0274207
sai_ss_base_tspent_p	-0.0236251	-0.0236251	-0.0236251
sai_ss_basket_nyr_p	0.000734562	-0.00411672	0.017557
sai_ss_basket_nmonth_p	0.003176	-0.0290258	-0.0290258
sai_ss_basket_perwk_p	0.0234231	-0.0383707	-0.0383707
sai_ss_basket_tspent_p	0.0148291	0.00977272	-0.012116
sai_ss_climb_nyr_p	-0.00580199	-0.0245312	-0.0330611
sai_ss_climb_nmonth_p	-0.0300812	-0.00130536	-0.0300812
sai_ss_climb_perwk_p	-0.0185711	-0.00905775	-0.0307699
sai_ss_climb_tspent_p	-0.0314591	-0.00329195	-0.0147743
sai_ss_fhock_nyr_p	-0.0283893	-0.0283893	-0.0283893
sai_ss_fhock_nmonth_p	-0.0281967	-0.0281967	-0.0281967
sai_ss_fhock_perwk_p	-0.030587	-0.0307293	-0.0302103
sai_ss_fhock_tspent_p	-0.0264465	-0.0110527	-0.0264465
sai_ss_fball_nyr_p	0.0177343	0.0113835	0.0142945
sai_ss_fball_nmonth_p	0.0305427	0.0212819	-0.0258221
sai_ss_fball_perwk_p	0.0231685	-0.00145334	-0.013927
sai_ss_fball_tspent_p	0.00566264	0.0225186	-0.0430437
sai_ss_gym_nyr_p	0.0189421	0.00246029	-0.0272849
sai_ss_gym_nmonth_p	-0.00813365	-0.0353495	-0.0244401
sai_ss_gym_perwk_p	-0.0196678	-0.0196678	-0.0196678
sai_ss_gym_tspent_p	-0.0161149	-0.0347253	-0.0347253
sai_ss_ihock_nyr_p	-0.0281607	-0.0281607	-0.0281607
sai_ss_ihock_nmonth_p	-0.0507427	-0.0294384	-0.0687971
sai_ss_ihock_perwk_p	-0.0428106	-0.0115249	-0.050493
sai_ss_ihock_tspent_p	-0.0464398	-0.0114004	-0.0629321
sai_ss_polo_nyr_p	-0.00916854	-0.0177923	-0.0288105
sai_ss_polo_nmonth_p	0.00155388	-0.00856642	-0.00987649
sai_ss_polo_perwk_p	-0.0248261	-0.00101484	-0.0248261
sai_ss_polo_tspent_p	-0.0114348	-0.0118536	-0.0239114
sai_ss_iskate_nyr_p	-0.0197981	-0.0197981	-0.0197981
sai_ss_iskate_nmonth_p	-0.0266219	-0.0162309	-0.0235587
sai_ss_iskate_perwk_p	-0.0299643	-0.00526803	-0.0310166
sai_ss_iskate_tspent_p	-0.0299561	-0.0169643	-0.0299561
sai_ss_m_arts_nyr_p	-0.0333914	-0.0181553	-0.0333914
sai_ss_m_arts_nmonth_p	-0.00704278	-0.0270756	-0.0213211
sai_ss_m_arts_perwk_p	-0.0285196	-0.0222913	-0.0273868
sai_ss_m_arts_tspent_p	-0.00983359	-0.0287448	-0.0364241
sai_ss_lax_nyr_p	-0.00113024	-0.0248131	-0.0136155
sai_ss_lax_nmonth_p	-0.0251295	-0.0251295	-0.0251295
sai_ss_lax_perwk_p	-0.0287965	-0.0287965	-0.0287965
sai_ss_lax_tspent_p	-0.0262891	-0.0262891	-0.0262891
sai_ss_rugby_nyr_p	-0.0286436	-0.0286436	-0.0286436
sai_ss_rugby_nmonth_p	-0.00752176	-0.0134657	-0.0302174
sai_ss_rugby_perwk_p	0.0014147	-0.0205073	-0.0282593
sai_ss_rugby_tspent_p	-0.00562355	-0.0322439	-0.0277383
sai_ss_skate_nyr_p	-0.0026476	-0.0130684	-0.0239868
sai_ss_skate_nmonth_p	-0.0286524	-0.00284175	-0.0331027
sai_ss_skate_perwk_p	-2.65712e-05	0.000516071	-0.0370843
sai_ss_skate_tspent_p	0.000772411	-0.00983631	0.000336205
sai_ss_sboard_nyr_p	-0.0348366	-0.0289101	-0.0348366
sai_ss_sboard_nmonth_p	-0.0313128	-0.0263986	-0.0313128
sai_ss_sboard_perwk_p	-0.0270194	-0.0270194	-0.0270194
sai_ss_sboard_tspent_p	-0.0220488	-0.0220488	-0.0220488
sai_ss_soc_nyr_p	0.0428212	0.0207712	0.0439986
sai_ss_soc_nmonth_p	0.0245367	0.0160019	-0.0063855
sai_ss_soc_perwk_p	0.00748027	-0.0133587	-0.0151965
sai_ss_soc_tspent_p	0.0164541	-0.0187974	-0.0489053
sai_ss_surf_nyr_p	-0.0268707	-0.0268707	-0.0268707
sai_ss_surf_nmonth_p	-0.0266215	-0.0266215	-0.0266215
sai_ss_surf_perwk_p	-0.0429697	-0.0429697	-0.0429697
sai_ss_surf_tspent_p	-0.0268812	-0.0107368	-0.0268812
sai_ss_wpolo_nyr_p	0.00805526	-0.0223282	-0.0110755
sai_ss_wpolo_nmonth_p	0.0222384	0.00595372	0.00501742
sai_ss_wpolo_perwk_p	-0.0121243	0.0177378	-0.0357699
sai_ss_wpolo_tspent_p	-0.0046134	0.00742526	-0.0319344
sai_ss_tennis_nyr_p	-0.0157297	-0.0287585	-0.0287585
sai_ss_tennis_nmonth_p	-0.0442001	-0.0266932	-0.044499
sai_ss_tennis_perwk_p	-0.0266922	-0.0266922	-0.0266922
sai_ss_tennis_tspent_p	-0.0305711	-0.0187107	-0.0305711
sai_ss_run_nyr_p	-0.0231316	-0.0362106	-0.0362106
sai_ss_run_nmonth_p	-0.0297654	-0.0330329	-0.0330329
sai_ss_run_perwk_p	-0.0315491	-0.0315491	-0.0315491
sai_ss_run_tspent_p	0.013569	0.0115553	-0.0143982
sai_ss_mma_nyr_p	-0.00064834	-0.0188512	-0.0255639
sai_ss_mma_nmonth_p	-0.0250927	-0.0264853	-0.0250927
sai_ss_mma_perwk_p	-0.0174052	-0.0268615	-0.0268615
sai_ss_mma_tspent_p	-0.0089786	-0.00277599	-0.0293805
sai_ss_vball_nyr_p	-0.0302957	-0.0355787	-0.0355787
sai_ss_vball_nmonth_p	-0.0133977	-0.0304455	-0.0304455
sai_ss_vball_perwk_p	-0.0244585	-0.0247698	-0.0247698
sai_ss_vball_tspent_p	-0.0225338	-0.0137	-0.0225753
sai_ss_yoga_nyr_p	-0.0159875	-0.0193246	-0.0211272
sai_ss_yoga_nmonth_p	-0.0222733	-0.0222733	-0.0222733
sai_ss_yoga_perwk_p	-0.0245694	-0.0245694	-0.0245694
sai_ss_yoga_tspent_p	-0.00953391	-0.0177389	-0.0246318
sai_ss_music_nyr_p	0.0108509	0.0111687	-0.000196877
sai_ss_music_nmonth_p	0.00725247	-0.00121495	-0.0189468
sai_ss_music_perwk_p	-0.010235	0.000530121	-0.0189719
sai_ss_music_tspent_p	-0.00596085	-0.00430283	0.00146136
sai_ss_art_nyr_p	-0.00374398	-0.017459	-0.00507718
sai_ss_art_nmonth_p	0.0171167	-0.0209031	6.87681e-05
sai_ss_art_perwk_p	-0.0333339	-0.0212743	-0.0333339
sai_ss_art_tspent_p	-0.0119622	-0.0366613	0.00805645
sai_ss_drama_nyr_p	-0.00778107	-0.0332144	-0.0332809
sai_ss_drama_nmonth_p	-0.0192758	-0.0171392	-0.017257
sai_ss_drama_perwk_p	-0.0220873	-0.0284348	-0.0284348
sai_ss_drama_tspent_p	-0.0132194	-0.0292114	-0.0353728
sai_ss_crafts_nyr_p	-0.0201529	-0.035094	-0.0357974
sai_ss_crafts_nmonth_p	0.000149076	-0.00322507	-0.0277956
sai_ss_crafts_perwk_p	-0.0191478	0.000190363	-0.0167849
sai_ss_crafts_tspent_p	0.0131871	-0.024569	-0.0352255
sai_ss_chess_nyr_p	-0.0188205	-0.0208379	-0.0359497
sai_ss_chess_nmonth_p	0.0147475	-0.00347573	-0.0271545
sai_ss_chess_perwk_p	-0.0224736	-0.0309304	-0.0378989
sai_ss_chess_tspent_p	-0.00885893	-0.0158527	-0.026654
sai_ss_collect_nyr_p	-0.00713761	-0.0199634	-0.00928836
sai_ss_collect_nmonth_p	-0.0303056	-0.0188966	-0.00784424
sai_ss_collect_perwk_p	-0.0364246	-0.0179699	-0.0364246
sai_ss_collect_tspent_p	-0.0388375	-0.0191124	-0.0388375
sai_ss_lmusic_years_p	0.0770337	0.0457839	0.0647255
sai_ss_lmusic_hours_p	0.059064	0.00594032	0.00351825
sai_ss_read_years_p	0.121902	0.0991334	0.0810347
sai_ss_read_hours_p	0.0346348	0.0243717	-0.0186526
sports_activity_ss_lmusic_p	0.0810811	0.0517361	0.0723523
sports_activity_ss_read_p	0.104528	0.0436137	0.044142
physical_activity1_y	0.112115	0.0305546	0.0902547
physical_activity2_y	0.040032	0.00953326	0.0330326
physical_activity5_y	0.128051	0.106572	0.101664
medhx_1a	-0.0313239	-0.0210019	-0.000410545
medhx_1b	-0.0293913	0.0175611	-0.00859616
medhx_4a	0.0617004	0.0146165	-0.00481805
medhx_5a	-0.0168945	-0.0223092	-0.010426
medhx_5b	0.0258852	0.0251484	0.00986858
medhx_6h_times	-0.0491977	0.024888	-0.0108378
medhx_8a	0.00386872	-0.0461298	-0.00355785
medhx_9a	0.00710291	0.00696125	0.0149395
medhx_9b	0.0152178	-0.0152529	0.0284486
medhx_9c	0.0550809	0.00819629	0.0106972
medhx_ss_4b_p	0.088439	0.0513218	0.0407079
medhx_ss_5b_p	0.0364577	0.0209828	0.050919
medhx_ss_6a_times_p	0.0675679	0.0244385	0.0342121
medhx_ss_6b_times_p	0.0183681	0.00813302	0.0148648
medhx_ss_6c_times_p	-0.00288313	-0.0319734	-0.0319734
medhx_ss_6d_times_p	0.0840334	0.0513688	0.0397704
medhx_ss_6e_times_p	0.00807289	0.0109369	-0.0250878
medhx_ss_6f_times_p	0.000945509	-0.0143034	-0.0248761
medhx_ss_6g_times_p	-0.0268399	-0.0244616	-0.00029427
medhx_ss_6h_times_p	-0.000710283	0.00465518	0.00356473
medhx_ss_6i_times_p	0.00847546	-0.00190695	0.024603
medhx_ss_6j_times_p	-0.0105515	-0.0141366	-0.0204263
medhx_ss_6k_times_p	-0.0161578	0.00637999	-0.0375198
medhx_ss_6l_times_p	0.0046784	0.0024952	-0.00137017
medhx_ss_6m_times_p	-0.04003	-0.0203003	-0.00606815
medhx_ss_6n_times_p	-0.0358669	-0.00219251	-0.0203064
medhx_ss_6o_times_p	0	-0.029326	-0.029326
medhx_ss_6p_times_p	0.0135812	-0.0337157	-0.0337157
medhx_ss_6q_times_p	-0.00923198	-0.0113933	-0.017938
medhx_ss_9b_p	0.0601223	0.0233548	0.0490524
medhx_ss_6t_times_p	-0.0312567	-0.0319717	-0.0312567
baby_teeth_count	0.124327	0.13023	0.100691
hormone_sal_sex	0.604152	0.43169	0.50026
hormone_scr_dhea_mean	0.256993	0.144254	0.143485
hormone_scr_dhea_rep2	0.248731	0.136496	0.134105
hormone_scr_hse_mean	0.122134	0.114508	0.0445515
hormone_scr_hse_rep1	0.130163	0.107529	0.0601301
hormone_scr_hse_rep2	0.130771	0.106458	0.0565781
hormone_scr_ert_mean	0.180997	0.130291	0.123496
hormone_scr_ert_rep1	0.171397	0.10712	0.11742
hormone_scr_ert_rep2	0.17531	0.121618	0.124669
tbi_ss_ntbiloc	-0.0833499	-0.0789779	-0.0682375
tbi_ss_nmrpi	-0.0216666	-0.0173098	-0.0216666
tbi_ss_worst_overall	0.0141861	-0.0111503	-0.00514674
pds_1_p	0.0443626	0.0418632	0.0663062
pds_2_p	0.0429905	0.0247752	0.0420753
pds_3_p	0.0903004	0.0427412	0.0550973
pds_m5_p	0.00792734	0.00131317	0.00471368
pds_m4_p	0.00441186	-0.0163675	-0.011411
pds_f4_p	0.0105924	-0.0319366	-0.00268634
pds_f5b_p	0.0320042	-0.00332941	-0.0447403
pds_p_ss_male_category	0.201507	0.0752972	0.165806
pds_p_ss_male_cat_nm	0.0431013	0.0323929	0.036066
pds_p_ss_female_category	0.389588	0.218097	0.217666
pds_p_ss_female_cat_nm	0.044073	-0.0138412	0.00839778
pds_p_ss_female_cat_2_nm	0.0261799	-0.0387215	-0.00728691
pds_p_ss_female_category_2	0.388376	0.220657	0.218824
pds_p_ss_male_category_2	0.195276	0.0734738	0.139475
pds_p_ss_male_cat_2_nm	0.0713728	0.0429005	0.0952361
brought_medications	0.0942999	0.107707	0.0947545
strength_otc_medication1	-0.0579859	-0.0513272	-0.00369327
units_otc_medication1	-0.101499	-0.000533787	-0.0242881
otc_med1_xr	0.0260164	0.0533408	-0.0176535
number_rx_otc_med1	0.0593713	0.12378	0.0893766
caff_24	0.0242694	-0.0128234	-0.00996785
su_y_hair_status_y	0.299683	0.268622	0.244968
ksads_aud_raw_578_p	-0.00168673	-0.0246757	-0.0218119
tox1_results_y	-0.0117594	0.0263623	0.00898253
tlfb_age	0.322423	0.325783	0.228696
tlfb_age_month	0.200529	0.216142	0.154
tlfb_age_calc_inmonths	0.393608	0.330269	0.259113
isip_1	-0.0619637	-0.0607351	-0.06319
su_isip_1_calc	-0.0323667	-0.0243454	-0.0323667
su_isip_1b_2_calc	0.0144775	-0.0107976	-0.0328653
caff_intake_1	-0.0168947	-0.0225708	-0.0217866
caff_intake_3	-0.0303793	0.0102161	-0.0314203
caff_intake_4	0.0801054	0.0577767	0.0456336
caff_intake_6	0.0516938	0.0268428	0.000870956
caff_intake_9	-0.0060358	-0.0014698	-0.0399503
caff_max	0.185461	0.140283	0.123296
caff_max_type	0.163994	0.136432	0.123308
su_caff_max_calc	0.170679	0.121204	0.106194
su_caff_ss_sum	0.0970336	0.057656	0.0681058
su_caff_ss_sum_nm	0.113516	0.110062	0.100192
su_caff_ss_sum_calc	0.0903111	0.0523448	0.0197532
su_risk_p_1	0.203521	0.119434	0.190117
su_risk_p_2	-0.00253643	-0.00339358	0.0382207
su_risk_p_3	-0.00526836	0.0219925	0.0236359
su_risk_p_4	0.0172335	0.00990048	0.0240124
su_risk_p_5	0.00802312	0.0265793	0.0362836
su_risk_p_6	0.251136	0.250345	0.150836
su_risk_p_7	0.0254862	0.00600423	0.0265391
su_risk_p_8	-0.0133814	-0.0018384	0.0219621
su_risk_p_9	-0.0444474	-0.0514615	0.0373831
path_alc_youth1	0.0387291	0.0192312	-0.00437375
path_alc_youth2	0.0401857	0.0083839	0.0168974
path_alc_youth3	-0.00333198	-0.0482817	-0.0137126
path_alc_youth4	-0.00924966	-0.0146686	0.00842701
path_alc_youth5	-0.0430592	-0.0420779	0.000456659
path_alc_youth6	-0.00415918	-0.0167435	-3.10905e-05
path_alc_youth7	-0.0214823	-0.0244948	0.0112153
path_alc_youth8	-0.029379	0.0139881	-0.000649921
path_alc_youth9	-0.040491	-0.0182925	-0.0479675
pls1_sess	0.113444	0.0756334	0.0714914
pls2_sess	0.13396	0.0404147	0.0167805
peer_deviance_1_4bbe5d	0.035423	0.0305584	0.0730813
peer_deviance_2_dd1457	0.00244251	-0.0255843	-0.000968677
peer_deviance_3_e1ec2e	0.00320505	0.0114325	-0.0440612
peer_deviance_4_b6c588	0.0151124	0.00225799	-0.028502
peer_deviance_5_bffa44	0.0229993	-0.0377898	0.00700622
peer_deviance_6_69562e	0.0328218	-0.053856	-0.025028
peer_deviance_8_35702e	0.0188393	-0.00778068	-0.0219833
peer_deviance_9_6dd4ef	0.0273907	-0.00986345	-0.0268699
pls2_p_caf	-0.0160174	-0.0496137	-0.0325089
bal_test1_result_y	-0.0278459	-0.0372223	0.012706
parent_rules_q1	0.10005	0.0340306	0.0938658
parent_rules_q1a	0.195383	0.118989	0.148181
parent_rules_q3	0.178202	0.133018	0.182561
parent_rules_q4	0.042592	0.00988053	0.0504271
parent_rules_q5	0.10129	0.0844605	0.0725173
parent_rules_q6	0.113885	0.080649	0.101477
parent_rules_q7	0.103309	0.0362821	0.0854746
parent_rules_q8	0.0227736	0.0286811	0.0239992
parent_rules_q9	0.10194	0.037642	0.0725092
kbi_y_sex_orient	0.0605389	0.0732738	0.0481638
kbi_y_trans_id	0.0886209	0.120333	0.0799451
ksads_bd_raw_959_p	0.04798	0.0487591	0.0139926
ksads_bd_raw_129_p	0.024616	0.00505566	-0.03541
ksads_bd_raw_126_p	0.0889503	0.0607357	0.0430068
ksads_bd_raw_122_p	0.102371	0.106918	0.060709
ksads_bd_raw_119_p	0.0606287	0.0434152	0.0553706
gen_child_behav_1	0.0972384	0.0787899	0.0803874
gen_child_behav_2	0.0929793	0.0612558	0.0428185
gen_child_behav_3	0.0815341	0.0182484	0.0490753
gen_child_behav_4	0.101769	0.0613777	0.0713102
gen_child_behav_5	0.0877939	0.039316	0.0444064
gen_child_behav_6	0.109593	0.0682706	0.0690627
gen_child_behav_7	0.0850125	0.0158416	0.0244759
gen_child_behav_8	0.056389	0.0379983	0.0336069
gen_child_behav_9	0.100246	0.061822	0.0549129
gen_child_behav_10	0.0681214	0.0427993	0.038245
pgbi_p_ss_score	0.136979	0.0914721	0.0791285
pgbi_p_ss_score_nm	0.00262662	0	-0.0210564
ksads_1_156_t	0.210126	0.225617	0.18273
ksads_1_157_t	0.205465	0.233149	0.181179
ksads_1_158_t	0.21021	0.223949	0.182742
ksads_1_159_t	0.205287	0.229772	0.182442
ksads_1_160_t	0.207402	0.22676	0.183675
ksads_1_161_t	0.202346	0.228197	0.183357
ksads_1_162_t	0.206836	0.226219	0.180094
ksads_1_163_t	0.2039	0.21966	0.183729
ksads_1_164_t	0.204876	0.222488	0.184047
ksads_1_165_t	0.208129	0.229658	0.180189
ksads_1_166_t	0.206923	0.229338	0.182086
ksads_1_167_t	0.197414	0.222814	0.183491
ksads_1_168_t	0.205172	0.226127	0.182399
ksads_1_169_t	0.208805	0.225596	0.180985
ksads_1_170_t	0.210391	0.228252	0.180738
ksads_1_171_t	0.205654	0.230521	0.180502
ksads_1_172_t	0.205663	0.223344	0.184723
ksads_1_173_t	0.208329	0.223545	0.184124
ksads_1_174_t	0.197541	0.225332	0.181674
ksads_1_175_t	0.207927	0.229964	0.179595
ksads_1_176_t	0.200955	0.220585	0.181323
ksads_1_177_t	0.202399	0.231789	0.182118
ksads_1_178_t	0.205533	0.227321	0.182725
ksads_1_179_t	0.21634	0.226758	0.182294
ksads_1_181_t	0.20673	0.232399	0.181304
ksads_1_182_t	0.207307	0.23103	0.179238
ksads_1_183_t	0.20789	0.227855	0.181989
ksads_1_184_t	0.206701	0.227993	0.181809
ksads_1_185_t	0.205047	0.230913	0.18488
ksads_1_186_t	0.200348	0.228123	0.183469
ksads_1_187_t	0.206943	0.230646	0.180997
ksads_1_188_t	0.204234	0.225969	0.180203
ksads_2_191_t	0.20023	0.213573	0.174833
ksads_2_192_t	0.193998	0.210632	0.181205
ksads_2_193_t	0.207643	0.211653	0.179157
ksads_2_194_t	0.201263	0.209264	0.178412
ksads_2_195_t	0.194524	0.209497	0.178402
ksads_2_196_t	0.204846	0.210258	0.178883
ksads_2_197_t	0.204044	0.209952	0.178237
ksads_2_198_t	0.196536	0.204355	0.180067
ksads_2_199_t	0.2037	0.215307	0.177121
ksads_2_200_t	0.191743	0.208235	0.179919
ksads_2_201_t	0.194192	0.215441	0.180502
ksads_2_202_t	0.197384	0.211427	0.176811
ksads_2_203_t	0.193328	0.208276	0.178188
ksads_2_204_t	0.20107	0.21107	0.180192
ksads_2_205_t	0.202114	0.210456	0.178166
ksads_2_206_t	0.196634	0.208069	0.179683
ksads_2_207_t	0.196604	0.21311	0.179118
ksads_2_208_t	0.195036	0.209656	0.175668
ksads_2_209_t	0.195059	0.213727	0.179174
ksads_2_211_t	0.204674	0.209853	0.177427
ksads_2_213_t	0.195683	0.211227	0.179586
ksads_2_214_t	0.19992	0.210071	0.177983
ksads_2_215_t	0.199056	0.211541	0.180315
ksads_2_216_t	0.194691	0.210428	0.178359
ksads_2_217_t	0.204045	0.209964	0.178078
ksads_2_218_t	0.194854	0.212925	0.177837
ksads_2_219_t	0.197489	0.213068	0.178819
ksads_2_220_t	0.205511	0.207296	0.177332
ksads_2_221_t	0.192311	0.212087	0.178238
ksads_2_222_t	0.202311	0.208662	0.178588
ksads_8_301_t	0.253936	0.2453	0.195869
ksads_8_302_t	0.250046	0.242975	0.201823
ksads_8_303_t	0.243063	0.246197	0.199121
ksads_8_304_t	0.246019	0.245731	0.195846
ksads_8_307_t	0.253468	0.239667	0.19959
ksads_8_308_t	0.25455	0.248103	0.197557
ksads_8_309_t	0.254235	0.241685	0.199221
ksads_8_310_t	0.254131	0.244	0.197506
ksads_8_311_t	0.2469	0.245453	0.198561
ksads_8_312_t	0.252061	0.247327	0.200416
ksads_8_313a_t	0.24049	0.247632	0.198116
ksads_8_313b_t	0.100904	0.0907833	0.0780605
ksads_10_320_t	0.258318	0.25064	0.20442
ksads_10_321_t	0.25443	0.254423	0.208135
ksads_10_322_t	0.2535	0.255003	0.206898
ksads_10_323_t	0.250461	0.24648	0.206685
ksads_10_324_t	0.254681	0.25069	0.208787
ksads_10_325_t	0.253753	0.254057	0.202598
ksads_10_326_t	0.253301	0.251607	0.205917
ksads_10_327_t	0.255684	0.259878	0.201541
ksads_10_328_t	0.259976	0.259429	0.204014
ksads_10_329_t	0.253423	0.248509	0.205584
ksads_10_330_t	0.252532	0.246223	0.20713
ksads_23_808_t	0.242284	0.229465	0.180129
ksads_23_809_t	0.239116	0.226376	0.181451
ksads_23_810_t	0.235328	0.224425	0.182579
ksads_23_811_t	0.232534	0.229444	0.18157
ksads_23_812_t	0.23372	0.21635	0.181322
ksads_23_813_t	0.239804	0.224623	0.183875
ksads_23_814_t	0.235109	0.223015	0.181361
ksads_23_815_t	0.227078	0.225771	0.184176
ksads_23_817_t	0.239221	0.22725	0.181835
ksads_23_819_t	0.236048	0.223783	0.181375
ksads_23_820_t	0.230438	0.224715	0.18106
ksads_23_821_t	0.232458	0.228335	0.183362
ksads_23_822_t	0.237399	0.225183	0.18098
ksads_23_823_t	0.231554	0.222091	0.181468
ksads_23_954_t	-0.0248509	0.00942457	-0.0248509
ksads_duration_t	-0.0346158	-0.0346158	-0.0346158
ksads_1_845_p	-0.0269145	0.00619563	-0.0269145
ksads_1_840_p	-0.0258931	0.00359866	-0.0269156
ksads_1_841_p	-0.0232154	-0.0137268	-0.0269427
ksads_1_842_p	-0.0270213	-0.0270213	-0.0270213
ksads_1_847_p	-0.0268812	-0.017004	-0.0268812
ksads_1_846_p	-0.0269254	-0.0269254	-0.0269254
ksads_1_172_p	0.214307	0.210791	0.180171
ksads_1_168_p	0.213733	0.207453	0.17292
ksads_1_171_p	0.218393	0.210584	0.177044
ksads_1_167_p	0.213894	0.213034	0.17577
ksads_1_3_p	-0.0269249	-0.0175869	-0.0269249
ksads_1_4_p	-0.0270096	-0.00560348	-0.0270096
ksads_1_156_p	0.213975	0.209873	0.174188
ksads_1_163_p	0.21041	0.207001	0.169895
ksads_1_164_p	0.209905	0.202824	0.175312
ksads_1_170_p	0.216389	0.211612	0.174605
ksads_1_169_p	0.210956	0.20323	0.174293
ksads_1_188_p	0.215766	0.207782	0.174143
ksads_1_187_p	0.206307	0.207883	0.172989
ksads_1_175_p	0.215348	0.210152	0.1742
ksads_1_176_p	0.209467	0.213238	0.171292
ksads_1_173_p	0.211835	0.21369	0.17417
ksads_1_174_p	0.214928	0.207524	0.17537
ksads_1_185_p	0.212995	0.206795	0.169904
ksads_1_186_p	0.217581	0.201433	0.174677
ksads_1_166_p	0.209115	0.209935	0.172929
ksads_1_181_p	0.211978	0.212677	0.17522
ksads_1_165_p	0.216549	0.207723	0.171696
ksads_1_182_p	0.216338	0.214943	0.177617
ksads_1_1_p	-0.0159708	-0.0145683	-0.0268518
ksads_1_2_p	-0.0269966	-0.0269966	-0.0269966
ksads_1_5_p	-0.0269377	0.0048995	-0.0269377
ksads_1_6_p	-0.0270639	0.00772493	-0.0270639
ksads_1_161_p	0.214231	0.210266	0.173453
ksads_1_162_p	0.209114	0.211073	0.174737
ksads_1_159_p	0.218131	0.2103	0.17058
ksads_1_160_p	0.21036	0.209697	0.180361
ksads_1_183_p	0.21135	0.216132	0.178202
ksads_1_184_p	0.214721	0.212038	0.175175
ksads_1_179_p	0.210832	0.203496	0.172957
ksads_1_157_p	0.213741	0.210336	0.178289
ksads_1_158_p	0.209001	0.214162	0.174447
ksads_1_177_p	0.209944	0.208656	0.175154
ksads_1_178_p	0.214539	0.213315	0.172986
ksads_2_837_p	-0.0185145	-0.0269807	-0.0269807
ksads_2_836_p	-0.0269318	-0.00771658	-0.0269318
ksads_2_831_p	-0.0148677	0.000657824	-0.0269383
ksads_2_830_p	-0.0228002	-0.00766799	-0.026908
ksads_2_833_p	-0.00935159	-0.0214237	-0.0269735
ksads_2_834_p	-0.0269319	-0.0018104	-0.0269319
ksads_2_839_p	-0.00231056	-0.00172652	-0.026879
ksads_2_838_p	-0.00111318	0.00244139	-0.0269135
ksads_2_12_p	-0.0268939	0.00421554	-0.0268939
ksads_2_13_p	-0.0113119	-0.0198783	-0.0268835
ksads_2_209_p	0.165316	0.166705	0.12753
ksads_2_211_p	0.161429	0.166532	0.125443
ksads_2_195_p	0.163293	0.166823	0.122963
ksads_2_196_p	0.165191	0.164778	0.127064
ksads_2_14_p	-0.0269264	0.00116707	-0.0269264
ksads_2_15_p	-0.0269115	0.00352618	-0.0269115
ksads_2_217_p	0.164661	0.159774	0.12402
ksads_2_218_p	0.165807	0.158071	0.125182
ksads_2_216_p	0.16249	0.16531	0.124008
ksads_2_215_p	0.166281	0.166969	0.123844
ksads_2_201_p	0.164019	0.141766	0.124705
ksads_2_202_p	0.165315	0.164736	0.12716
ksads_2_213_p	0.163255	0.1669	0.126195
ksads_2_214_p	0.16491	0.160636	0.124234
ksads_2_11_p	-0.0265461	0.00362044	-0.0265461
ksads_2_10_p	-0.0230051	-0.0177958	-0.0267536
ksads_2_9_p	-0.023697	-0.0268934	-0.0268934
ksads_2_7_p	-0.0270052	0.0066656	-0.0270052
ksads_2_8_p	-0.0206575	-0.0051414	-0.0269516
ksads_2_191_p	0.164267	0.166926	0.124505
ksads_2_193_p	0.160109	0.166117	0.125016
ksads_2_190_p	0.164352	0.161062	0.127411
ksads_2_197_p	0.169667	0.161671	0.124202
ksads_2_198_p	0.161799	0.158767	0.125186
ksads_2_207_p	0.165369	0.157441	0.122171
ksads_2_208_p	0.165205	0.160792	0.122841
ksads_2_200_p	0.164334	0.159273	0.12602
ksads_2_199_p	0.165409	0.162742	0.126357
ksads_2_212_p	0.166226	0.160796	0.124769
ksads_2_206_p	0.163881	0.160547	0.123648
ksads_2_210_p	0.163871	0.165073	0.126815
ksads_2_203_p	0.16682	0.165322	0.125921
ksads_2_204_p	0.166152	0.16473	0.124271
ksads_2_205_p	0.165315	0.157453	0.123118
ksads_2_221_p	0.168025	0.166623	0.125863
ksads_2_222_p	0.161116	0.165571	0.126947
ksads_2_219_p	0.165112	0.167642	0.124413
ksads_2_220_p	0.16652	0.156935	0.12623
ksads_2_192_p	0.161127	0.164559	0.123871
ksads_2_194_p	0.163705	0.160547	0.125479
ksads_4_258_p	0.257586	0.2447	0.195636
ksads_4_259_p	0.254666	0.243761	0.196595
ksads_4_231_p	0.2633	0.245727	0.198183
ksads_4_230_p	0.263784	0.248615	0.199576
ksads_4_255_p	0.25364	0.248316	0.197171
ksads_4_252_p	0.25302	0.244221	0.196665
ksads_4_253_p	0.257925	0.248472	0.19266
ksads_4_254_p	0.262598	0.247663	0.194653
ksads_4_241_p	0.259403	0.23786	0.195624
ksads_4_242_p	0.255813	0.234632	0.19674
ksads_4_237_p	0.25599	0.245092	0.196021
ksads_4_238_p	0.261276	0.250655	0.196672
ksads_4_239_p	0.254843	0.238923	0.196937
ksads_4_240_p	0.250693	0.239052	0.197437
ksads_4_257_p	0.260576	0.242024	0.199482
ksads_4_256_p	0.251798	0.23479	0.197675
ksads_4_247_p	0.262879	0.249414	0.19348
ksads_4_245_p	0.260526	0.250977	0.19933
ksads_4_246_p	0.259577	0.245168	0.197493
ksads_4_234_p	0.263827	0.24422	0.201357
ksads_4_260_p	0.258422	0.234019	0.196911
ksads_4_232_p	0.258721	0.242771	0.196621
ksads_4_233_p	0.261834	0.241857	0.197515
ksads_4_249_p	0.251121	0.241962	0.195227
ksads_4_248_p	0.259367	0.24786	0.196111
ksads_4_250_p	0.253302	0.248882	0.199422
ksads_4_251_p	0.258329	0.248624	0.195761
ksads_5_906_p	-0.0046705	-0.0150251	-0.0208855
ksads_5_907_p	-0.0117009	-0.00786507	-0.0154787
ksads_5_857_p	0.00365505	-0.0278867	-0.0208855
ksads_5_858_p	0.0183017	-0.00128881	-0.0208765
ksads_5_261_p	0.268809	0.267354	0.204827
ksads_5_262_p	0.273307	0.266098	0.200296
ksads_5_264_p	0.271743	0.271225	0.200507
ksads_5_263_p	0.26536	0.256831	0.206958
ksads_5_20_p	0.00468062	-0.0162704	-0.0208661
ksads_5_21_p	-0.00386146	-0.0209041	-0.0209041
ksads_5_265_p	0.264302	0.260128	0.199802
ksads_5_266_p	0.271248	0.273825	0.199392
ksads_5_267_p	0.26839	0.264121	0.204958
ksads_5_268_p	0.268625	0.265614	0.204492
ksads_5_269_p	0.273069	0.26265	0.19974
ksads_5_270_p	0.266799	0.256515	0.203828
ksads_7_861_p	-0.0269427	-0.0154866	-0.0269427
ksads_7_909_p	-0.0114969	-0.0269481	-0.0269481
ksads_7_910_p	-0.0269602	-0.0129009	-0.0269602
ksads_7_862_p	-0.0202655	-0.0151314	-0.0268838
ksads_7_300_p	0.19689	0.202936	0.165305
ksads_7_27_p	-0.0138593	-0.00933331	-0.0269883
ksads_7_26_p	-0.0200986	-0.0269474	-0.0269474
ksads_7_288_p	0.193555	0.200993	0.161914
ksads_7_287_p	0.190191	0.200957	0.164709
ksads_7_291_p	0.188361	0.198559	0.163095
ksads_7_292_p	0.195857	0.197316	0.162781
ksads_7_293_p	0.1913	0.197601	0.164716
ksads_7_294_p	0.197489	0.201992	0.162615
ksads_7_289_p	0.194187	0.201561	0.168683
ksads_7_290_p	0.186967	0.202372	0.16544
ksads_7_296_p	0.196142	0.201523	0.162848
ksads_7_295_p	0.19969	0.201746	0.163696
ksads_7_24_p	-0.0269026	-0.0109649	-0.0269026
ksads_7_25_p	-0.0213396	-0.0135345	-0.0235843
ksads_7_281_p	0.199475	0.201163	0.162186
ksads_7_282_p	0.191632	0.204371	0.166816
ksads_7_285_p	0.189525	0.203191	0.165671
ksads_7_286_p	0.185912	0.206141	0.16384
ksads_7_297_p	0.194775	0.203995	0.162244
ksads_7_299_p	0.190783	0.201163	0.164354
ksads_7_298_p	0.191431	0.197481	0.164663
ksads_7_284_p	0.187829	0.202263	0.16491
ksads_7_283_p	0.190945	0.203169	0.163662
ksads_8_864_p	-0.00157876	-0.0270533	-0.0270533
ksads_8_863_p	-0.0179523	-0.00483516	-0.0269147
ksads_8_912_p	-0.00123795	-0.0171409	-0.0269482
ksads_8_309_p	0.228453	0.227983	0.18058
ksads_8_310_p	0.232488	0.237405	0.184413
ksads_8_29_p	-0.00797765	-0.0248345	-0.0269063
ksads_8_31_p	-0.0230841	-0.0141414	-0.0269843
ksads_8_313_p	0.231409	0.239989	0.182033
ksads_8_30_p	-0.0269073	-0.00718756	-0.0269073
ksads_8_312_p	0.233638	0.229097	0.182114
ksads_8_311_p	0.231509	0.23674	0.186185
ksads_8_308_p	0.227527	0.234036	0.177095
ksads_8_304_p	0.231643	0.237666	0.18541
ksads_8_307_p	0.232206	0.235867	0.180761
ksads_8_302_p	0.238918	0.22745	0.186454
ksads_8_303_p	0.233925	0.230702	0.181277
ksads_8_301_p	0.229496	0.231712	0.186955
ksads_10_914_p	-0.0230534	-0.00724711	-0.0269755
ksads_10_913_p	-0.0144031	-0.0163064	-0.0269177
ksads_10_869_p	-0.0173279	-0.00926423	-0.0269905
ksads_10_870_p	-0.0269689	-0.0158304	-0.0269689
ksads_10_45_p	-0.0269866	-0.00537394	-0.0269866
ksads_10_46_p	-0.0269062	-0.00876019	-0.0269062
ksads_10_320_p	0.234413	0.229563	0.186978
ksads_10_321_p	0.236566	0.220311	0.191271
ksads_10_325_p	0.228704	0.221225	0.188629
ksads_10_324_p	0.234836	0.226327	0.191456
ksads_10_329_p	0.23101	0.234752	0.192091
ksads_10_328_p	0.233264	0.201758	0.189153
ksads_10_326_p	0.231974	0.231817	0.188674
ksads_10_327_p	0.233353	0.231069	0.185803
ksads_10_323_p	0.234329	0.222354	0.190184
ksads_10_47_p	-0.0227889	-0.00780343	-0.0269877
ksads_10_330_p	0.230109	0.216435	0.185803
ksads_10_322_p	0.233911	0.211334	0.184368
ksads_11_917_p	0.0236888	-0.0132767	-0.0156516
ksads_11_918_p	-0.00511807	-0.0213038	-0.0209459
ksads_11_919_p	0.00407618	-0.00973367	-0.0209418
ksads_11_920_p	-0.0126834	-2.95178e-05	-0.0209384
ksads_11_343_p	0.21187	0.214293	0.166327
ksads_11_344_p	0.208423	0.218549	0.169138
ksads_11_331_p	0.212272	0.209814	0.167448
ksads_11_332_p	0.210493	0.215867	0.167341
ksads_11_48_p	0.0016745	-0.0213157	-0.0209817
ksads_11_49_p	0.0027256	-0.0210001	-0.0111284
ksads_11_335_p	0.205038	0.212305	0.166779
ksads_11_336_p	0.20981	0.215935	0.167668
ksads_11_342_p	0.197787	0.213345	0.166855
ksads_11_51_p	0.00793173	-0.00934487	-0.0208898
ksads_11_341_p	0.200512	0.210028	0.165392
ksads_11_50_p	0.0070136	-0.0114176	-0.0209458
ksads_11_339_p	0.204885	0.206705	0.164877
ksads_11_340_p	0.216199	0.221453	0.167849
ksads_11_347_p	0.207915	0.216245	0.168712
ksads_11_348_p	0.207646	0.213297	0.166363
ksads_11_333_p	0.208755	0.213113	0.166533
ksads_11_334_p	0.210778	0.210814	0.165711
ksads_11_346_p	0.216705	0.219044	0.168579
ksads_11_345_p	0.204988	0.219799	0.168841
ksads_11_337_p	0.208105	0.212285	0.169262
ksads_11_338_p	0.213429	0.213169	0.168465
ksads_13_469_p	0.192331	0.18463	0.158758
ksads_13_476_p	0.192899	0.186653	0.15451
ksads_13_470_p	0.190841	0.175544	0.153737
ksads_13_477_p	0.188208	0.177839	0.156422
ksads_13_473_p	0.196395	0.180792	0.156149
ksads_13_478_p	0.190909	0.18089	0.157937
ksads_13_471_p	0.194628	0.183271	0.158518
ksads_13_474_p	0.186761	0.182069	0.158207
ksads_13_472_p	0.191283	0.177365	0.156037
ksads_13_479_p	0.187502	0.177721	0.155697
ksads_13_475_p	0.194611	0.18195	0.158456
ksads_13_480_p	0.18725	0.178313	0.155079
ksads_14_398_p	0.166414	0.171541	0.140194
ksads_14_414_p	0.167022	0.169269	0.14352
ksads_14_403_p	0.169906	0.179113	0.144899
ksads_14_419_p	0.167968	0.175822	0.141219
ksads_14_405_p	0.16786	0.174807	0.142784
ksads_14_421_p	0.170904	0.173794	0.141674
ksads_14_406_p	0.166054	0.16674	0.141769
ksads_14_422_p	0.173843	0.168248	0.141883
ksads_14_76_p	-0.0273806	-0.0293353	-0.0293353
ksads_14_413_p	0.165226	0.16659	0.142969
ksads_14_396_p	0.176032	0.177242	0.141405
ksads_14_420_p	0.167989	0.165488	0.14237
ksads_14_397_p	0.167072	0.169085	0.143154
ksads_14_404_p	0.176311	0.166266	0.143431
ksads_14_86_p	-0.00178249	-0.0279674	-0.0295559
ksads_14_78_p	0.00147477	-0.0259057	-0.0294692
ksads_14_84_p	0.26919	0.127404	0.166354
ksads_14_412_p	0.169583	0.174387	0.142596
ksads_14_401_p	0.166177	0.174418	0.141321
ksads_14_417_p	0.170416	0.17065	0.143197
ksads_14_80_p	-0.00295882	-0.0128477	-0.0294188
ksads_14_82_p	-0.0052063	-0.0295679	-0.0295679
ksads_14_400_p	0.170027	0.167562	0.140724
ksads_14_416_p	0.166948	0.167178	0.144876
ksads_14_88_p	-0.0293685	-0.0293685	-0.0293685
ksads_14_89_p	-0.0103479	0.000792325	-0.0293734
ksads_14_399_p	0.16586	0.180764	0.142615
ksads_14_415_p	0.174487	0.171691	0.143985
ksads_14_408_p	0.171756	0.171806	0.14119
ksads_14_424_p	0.167647	0.173741	0.143482
ksads_14_394_p	0.169436	0.168688	0.142228
ksads_14_410_p	0.174033	0.171716	0.14189
ksads_14_395_p	0.173909	0.174143	0.144676
ksads_14_411_p	0.168392	0.174294	0.139647
ksads_14_407_p	0.176302	0.169662	0.137562
ksads_14_423_p	0.169166	0.173901	0.143688
ksads_14_402_p	0.173296	0.174758	0.142412
ksads_14_418_p	0.174071	0.173954	0.140733
ksads_14_409_p	0.16689	0.171437	0.139979
ksads_14_425_p	0.170294	0.172606	0.141928
ksads_14_429_p	0.168521	0.172044	0.144217
ksads_14_430_p	0.172161	0.17533	0.142476
ksads_15_901_p	0.0175357	-0.021451	-0.0293543
ksads_15_902_p	-0.0293933	-0.0293933	-0.0293933
ksads_15_95_p	-0.0152965	-0.0126921	-0.0293328
ksads_15_436_p	0.163262	0.168202	0.143148
ksads_15_442_p	0.152726	0.166138	0.143942
ksads_15_96_p	-0.00495685	-0.0279556	-0.0291965
ksads_15_435_p	0.155021	0.165103	0.143327
ksads_15_440_p	0.157547	0.167894	0.14517
ksads_15_94_p	-0.0022264	-0.0293414	-0.0293414
ksads_15_433_p	0.165841	0.168359	0.143956
ksads_15_443_p	0.161194	0.172155	0.141673
ksads_15_93_p	0.00212243	-0.029402	-0.029402
ksads_15_432_p	0.156965	0.166277	0.144486
ksads_15_439_p	0.16256	0.165041	0.145548
ksads_15_91_p	-0.0269064	-0.0109044	-0.0269064
ksads_15_92_p	-0.026547	-0.000650972	-0.026547
ksads_15_445_p	0.163175	0.164827	0.141795
ksads_15_438_p	0.153189	0.17088	0.141538
ksads_15_97_p	0.0454356	0.0011443	-0.0305887
ksads_15_437_p	0.158367	0.163184	0.144528
ksads_15_444_p	0.154415	0.164337	0.141707
ksads_15_441_p	0.154789	0.163219	0.142479
ksads_15_434_p	0.161427	0.167835	0.141612
ksads_16_900_p	-0.0293437	-0.0134801	-0.0293437
ksads_16_897_p	-0.0267119	-0.0293789	-0.0293789
ksads_16_899_p	-0.00271562	-0.0293546	-0.0293546
ksads_16_898_p	-0.00767283	-0.0233753	-0.0218107
ksads_16_450_p	0.183606	0.19372	0.161552
ksads_16_449_p	0.183019	0.201654	0.161376
ksads_16_463_p	0.18863	0.195315	0.164644
ksads_16_464_p	0.185151	0.194836	0.163543
ksads_16_453_p	0.182569	0.20048	0.156476
ksads_16_454_p	0.184146	0.200238	0.161665
ksads_16_461_p	0.181117	0.201521	0.162369
ksads_16_462_p	0.184132	0.199277	0.16174
ksads_16_465_p	0.182913	0.201976	0.162369
ksads_16_466_p	0.185489	0.200684	0.167111
ksads_16_98_p	0.0120402	-0.0225245	-0.0292719
ksads_16_99_p	-0.0292975	-0.0292975	-0.0292975
ksads_16_104_p	0.00876359	-0.0242506	-0.0293711
ksads_16_105_p	-0.00472025	-0.0292804	-0.0292804
ksads_16_102_p	0.0100777	-0.0298803	-0.0293446
ksads_16_103_p	-0.00221831	-0.0274859	-0.0293486
ksads_16_458_p	0.184086	0.197871	0.158751
ksads_16_457_p	0.18387	0.197884	0.162494
ksads_16_456_p	0.179582	0.19777	0.160977
ksads_16_455_p	0.180831	0.199594	0.161097
ksads_16_452_p	0.186143	0.197285	0.164022
ksads_16_107_p	-0.00594491	-0.0198017	-0.029308
ksads_16_451_p	0.185307	0.199056	0.15925
ksads_16_106_p	-0.029335	-0.029335	-0.029335
ksads_16_100_p	0.0150464	-0.0293438	-0.0293438
ksads_16_101_p	0.013508	-0.0208867	-0.0293525
ksads_16_447_p	0.185597	0.195059	0.164023
ksads_16_448_p	0.182756	0.201107	0.157456
ksads_16_460_p	0.182121	0.19777	0.164288
ksads_16_459_p	0.186725	0.20072	0.161733
ksads_19_124_p	-0.0119527	-0.0173817	-0.0269036
ksads_19_122_p	0	0.0104751	-0.026934
ksads_19_123_p	-0.0269231	-0.00341185	-0.0269231
ksads_19_121_p	-0.00541691	-0.0269373	-0.0269373
ksads_20_893_p	-0.0269199	-0.00901246	-0.0269199
ksads_20_872_p	-0.00112475	-0.0269361	-0.0269361
ksads_20_881_p	-0.0132624	-0.00344956	-0.0269231
ksads_20_889_p	-0.0107728	-0.0145989	-0.0269231
ksads_20_879_p	-0.00607367	0.00281244	-0.0269286
ksads_20_882_p	-0.0119758	0.0109609	-0.0269231
ksads_20_126_p	-0.0203394	-0.00902521	-0.026956
ksads_20_673_p	0.279313	0.25543	0.205618
ksads_20_613_p	0.276683	0.25109	0.205081
ksads_20_658_p	0.279795	0.263908	0.20526
ksads_20_703_p	0.278282	0.2513	0.201623
ksads_20_553_p	0.281231	0.256049	0.204802
ksads_20_688_p	0.279093	0.236567	0.204353
ksads_20_511_p	0.277985	0.257474	0.207003
ksads_20_512_p	0.275029	0.25077	0.204086
ksads_20_129_p	-0.026908	-0.0115392	-0.026908
ksads_20_128_p	-0.0268972	-0.0141862	-0.0268972
ksads_20_127_p	-0.0269004	-0.0137729	-0.0269004
ksads_20_520_p	0.28277	0.254978	0.204768
ksads_20_519_p	0.28364	0.257027	0.205342
ksads_20_694_p	0.275392	0.241062	0.20341
ksads_20_709_p	0.281202	0.26495	0.20412
ksads_20_559_p	0.283283	0.250439	0.20028
ksads_20_518_p	0.280856	0.263244	0.204363
ksads_20_693_p	0.280298	0.240704	0.203174
ksads_20_509_p	0.279044	0.256906	0.205367
ksads_20_510_p	0.277661	0.260182	0.204461
ksads_20_555_p	0.279624	0.244283	0.202938
ksads_20_525_p	0.276218	0.254673	0.20224
ksads_20_530_p	0.277272	0.255363	0.205719
ksads_20_577_p	0.279755	0.257127	0.203397
ksads_20_697_p	0.277059	0.255386	0.207097
ksads_20_562_p	0.276317	0.243389	0.203503
ksads_20_682_p	0.276895	0.254648	0.206249
ksads_20_547_p	0.273951	0.254274	0.203649
ksads_20_712_p	0.2791	0.261455	0.201961
ksads_20_133_p	-0.0269351	-0.0183091	-0.0269351
ksads_20_666_p	0.275039	0.252175	0.202884
ksads_20_523_p	0.276626	0.256549	0.203847
ksads_20_524_p	0.279716	0.257531	0.210651
ksads_20_561_p	0.282231	0.257466	0.203083
ksads_20_696_p	0.272823	0.253843	0.2024
ksads_20_795_p	0.278689	0.249891	0.202523
ksads_20_130_p	-0.0236137	-0.0183156	-0.0269459
ksads_20_687_p	0.272396	0.261652	0.205218
ksads_20_552_p	0.273199	0.255423	0.202466
ksads_20_689_p	0.275412	0.254627	0.206754
ksads_20_764_p	0.275382	0.260018	0.202512
ksads_20_554_p	0.275402	0.257649	0.204202
ksads_20_536_p	0.279506	0.258372	0.206231
ksads_20_528_p	0.274182	0.264874	0.204751
ksads_20_700_p	0.274122	0.257844	0.208648
ksads_20_565_p	0.282714	0.255758	0.203945
ksads_20_533_p	0.280055	0.264754	0.20689
ksads_20_557_p	0.278247	0.25615	0.206522
ksads_20_692_p	0.279978	0.258738	0.206869
ksads_20_513_p	0.27606	0.254792	0.204466
ksads_20_515_p	0.281157	0.248896	0.201081
ksads_20_514_p	0.275921	0.249326	0.205747
ksads_20_556_p	0.281285	0.250394	0.206417
ksads_21_923_p	0.00517585	-0.0208934	-0.0208934
ksads_21_924_p	0.0138629	-0.0148685	-0.0208953
ksads_21_921_p	0.0152571	-0.00756619	-0.0208855
ksads_21_922_p	-0.00867331	-0.0209072	-0.0209072
ksads_21_355_p	0.245228	0.238146	0.190029
ksads_21_356_p	0.237984	0.239156	0.192373
ksads_21_374_p	0.242914	0.236022	0.192206
ksads_21_373_p	0.242617	0.232941	0.191862
ksads_21_360_p	0.242167	0.235005	0.191291
ksads_21_359_p	0.240314	0.234358	0.190263
ksads_21_365_p	0.241618	0.233486	0.190269
ksads_21_366_p	0.234413	0.233466	0.191686
ksads_21_138_p	0.00256694	-0.0149223	-0.0209122
ksads_21_137_p	-0.00227962	-0.0208599	-0.0208599
ksads_21_358_p	0.238255	0.237214	0.190569
ksads_21_369_p	0.241486	0.233674	0.195212
ksads_21_370_p	0.243761	0.233722	0.190158
ksads_21_357_p	0.243982	0.231188	0.194964
ksads_21_350_p	0.247827	0.23304	0.186764
ksads_21_349_p	0.243963	0.236511	0.190065
ksads_21_371_p	0.23854	0.234647	0.18898
ksads_21_372_p	0.23485	0.233898	0.19316
ksads_21_134_p	0.00757111	-0.000870935	-0.0209927
ksads_21_376_p	0.242854	0.240911	0.191669
ksads_21_375_p	0.243265	0.237616	0.189453
ksads_21_385_p	0.242036	0.237154	0.188109
ksads_21_386_p	0.236444	0.231182	0.194894
ksads_21_367_p	0.237885	0.239337	0.193422
ksads_21_368_p	0.237012	0.235385	0.191447
ksads_21_383_p	0.235557	0.235851	0.19522
ksads_21_384_p	0.238342	0.237763	0.189101
ksads_21_135_p	-0.00392757	-0.00875569	-0.0209116
ksads_21_136_p	0.00275937	-0.00907515	-0.0208649
ksads_21_377_p	0.239848	0.236171	0.19111
ksads_21_378_p	0.242787	0.235208	0.191843
ksads_21_353_p	0.237504	0.240494	0.188389
ksads_21_354_p	0.238957	0.243432	0.188892
ksads_21_139_p	0.00439348	-0.0209327	-0.00981935
ksads_21_140_p	-0.000473936	-0.0208697	-0.0208697
ksads_21_391_p	0.240666	0.236713	0.192654
ksads_21_392_p	0.236857	0.234935	0.191503
ksads_21_352_p	0.243734	0.236422	0.192112
ksads_21_351_p	0.245995	0.235866	0.191386
ksads_21_363_p	0.241209	0.237339	0.196142
ksads_21_364_p	0.242722	0.239531	0.195331
ksads_21_361_p	0.240478	0.233306	0.191264
ksads_21_362_p	0.237364	0.238824	0.191944
ksads_21_379_p	0.242171	0.239712	0.190288
ksads_21_380_p	0.241018	0.236411	0.195055
ksads_21_388_p	0.24117	0.239734	0.189855
ksads_21_387_p	0.241005	0.235629	0.187521
ksads_21_389_p	0.274151	0.271637	0.201832
ksads_21_390_p	0.261879	0.275762	0.19783
ksads_21_382_p	0.241678	0.233753	0.191316
ksads_21_381_p	0.244736	0.24013	0.191222
ksads_23_946_p	-0.0269189	-0.0248171	-0.0269189
ksads_23_957_p	-0.0270096	-0.0248262	-0.0270096
ksads_23_954_p	-0.0119555	-0.0241661	-0.0269231
ksads_23_965_p	-0.0269058	-0.0090183	-0.0269058
ksads_23_956_p	-0.026884	-0.000195034	-0.026884
ksads_23_945_p	-0.0269022	0.00180108	-0.0269022
ksads_23_950_p	-0.0118227	-0.0269264	-0.0269264
ksads_23_961_p	-0.00464612	-0.0232425	-0.0269308
ksads_23_947_p	-0.0270168	-0.0270168	-0.0270168
ksads_23_958_p	-0.0269669	-0.0269669	-0.0269669
ksads_23_948_p	-0.0269362	-0.00747801	-0.0269362
ksads_23_959_p	-0.0202732	-0.0268918	-0.0268918
ksads_23_949_p	-0.0235663	-0.0216485	-0.0269264
ksads_23_960_p	-0.0227381	0.00423543	-0.0269254
ksads_23_963_p	-0.0269231	-0.0198289	-0.0269231
ksads_23_951_p	-0.0228335	-0.024827	-0.0269275
ksads_23_962_p	-0.0269286	-0.0108951	-0.0269286
ksads_23_953_p	-0.0228349	-0.0137487	-0.026934
ksads_23_964_p	-0.026935	-0.0114336	-0.026935
ksads_23_813_p	0.254038	0.239152	0.192727
ksads_23_822_p	0.250027	0.241435	0.190361
ksads_23_144_p	-0.026884	-0.026884	-0.026884
ksads_23_823_p	0.250904	0.240814	0.188468
ksads_23_814_p	0.251149	0.246583	0.192164
ksads_23_809_p	0.252151	0.245334	0.190932
ksads_23_149_p	-0.0269231	-0.0159797	-0.0269231
ksads_23_150_p	-0.0203654	-0.00201436	-0.0269091
ksads_23_812_p	0.251152	0.243286	0.189135
ksads_23_821_p	0.247392	0.236055	0.192054
ksads_23_817_p	0.245517	0.242405	0.1883
ksads_23_143_p	-0.0269022	-0.0269022	-0.0269022
ksads_23_146_p	-0.0270096	0.00465361	-0.0270096
ksads_23_145_p	-0.0230911	-0.0190231	-0.0269189
ksads_23_810_p	0.244636	0.239935	0.189775
ksads_23_819_p	0.252848	0.241473	0.190552
ksads_23_147_p	-0.0270168	-0.0270168	-0.0270168
ksads_23_148_p	-0.0269669	-0.0269669	-0.0269669
ksads_23_811_p	0.247734	0.245301	0.191949
ksads_23_820_p	0.251549	0.248191	0.194213
ksads_23_815_p	0.248987	0.253169	0.189169
ksads_duration_p	0.0106538	-0.0290161	-0.0290161
ksads_psychosis_raw_166_p	0.0280018	-0.0259695	0.00712141
ksads_psychosis_raw_163_p	0.0016604	0.0129226	0.00977652
ksads_odd_raw_454_p	0.088783	0.0649701	0.0867083
ksads_odd_raw_457_p	0.0510195	0.0122591	0.0621738
ksads_gad_raw_271_p	-0.00903579	0.0149312	0.0475445
ksads_phobia_raw_268_p	0.0027292	0.0482357	0.0820228
ksads_phobia_raw_230_p	0.0219994	0.000269255	0.0115627
ksads_homicidal_raw_835_p	-0.0265579	-0.0265579	-0.0265579
ksads_agorap_raw_182_p	-0.0334701	-0.0401667	-0.0614405
ksads_agorap_raw_183_p	-0.0556737	-0.0288821	-0.0556737
ksads_agorap_raw_184_p	-0.0466166	-0.0203815	-0.0420371
ksads_agorap_raw_185_p	-0.0620146	-0.064683	-0.0618655
ksads_agorap_raw_186_p	-0.0414883	-0.047346	-0.047346
ksads_agorap_raw_187_p	-0.0444165	-0.0472894	-0.0472894
ksads_agorap_raw_188_p	-0.0805043	-0.0315034	-0.0830942
ksads_agorap_raw_189_p	-0.0435862	-0.01886	-0.0513639
ksads_agorap_raw_190_p	-0.018907	-0.00889788	-0.031495
ksads_agorap_raw_191_p	-0.0209137	0.0254266	-0.0368418
ksads_agorap_raw_192_p	-0.022613	-0.0108212	-0.0172255
famhx_1a_p	0.103972	0.0433997	0.0639252
famhx_1b_p	0.0878047	0.0655407	0.0346681
famhx_2a_p	0.116591	0.0782371	0.0701083
famhx_2b_p	0.0927172	0.0337644	0.0446153
fhx_3a_p	0.14572	0.110007	0.0953818
fhx_3b_p	0.108145	0.0588298	0.0696665
fhx_3c_sibs_same_birth	0.544787	0.447998	0.385405
fhx_3f_younger_p	0.195163	0.143239	0.130615
fhx_3f_older_p	0.169995	0.103205	0.136184
fhx_3ha_p	0.258265	0.151625	0.22146
fhx_3hb_p	0.247131	0.177563	0.235051
fhx_3h_younger_p	0.138267	0.105193	0.0492787
fhx_3h_older_p	0.0227444	-0.014883	0.0550276
famhx_4_p	0.028575	-0.00504464	0.0158188
fam_history_5_yes_no	0.0135993	0.0121011	0.0166553
fam_history_6_yes_no	0.0563865	0.0324199	0.0130729
fam_history_q6a_depression	0.027117	0.0380853	0.0393412
fam_history_q6b_depression	0.120417	0.0970987	0.0614999
fam_history_q6c_depression	0.0602446	0.0452242	0.0495228
fam_history_q6d_depression	-0.0251965	-0.0270822	-0.0254892
fam_history_q6e_depression	0.0676124	0.0482426	0.0459832
fam_history_q6f_depression	0.0201761	0.0234872	0.031183
q6g_pat_uncle1_depression	0.0247107	0.0419216	-0.00812128
q6h_pat_aunt1_depression	0.0268788	0.00370223	0.0530088
q6i_mat_uncle1_depression	0.00964393	-0.0201016	-0.0131859
q6j_mat_aunt1_depression	0.00800628	-0.0129249	-0.00230517
q6k_full_sib_young1_depression	0.0363938	-0.0486223	-0.0486223
q6l_full_sib_old1_depression	-0.0262947	-0.0543094	-0.0735225
fam_history_7_yes_no	0.0533416	0.0510417	0.0430741
fam_history_8_yes_no	0.0393052	0.00306362	0.00308041
fam_history_9_yes_no	0.0165403	0.00559335	0.00494123
fam_history_q9a_trouble	0.0405561	-0.0311534	-0.0315507
fam_history_q9b_trouble	0.0452423	0.0592112	0.0663604
fam_history_q9c_trouble	0.0122524	0.0357239	0.0429617
fam_history_q9d_trouble	-0.0616493	-0.0355377	-0.0583033
fam_history_q9e_trouble	0.00742001	-0.0282891	-0.0124608
fam_history_q9f_trouble	-0.0647314	0.0117292	-0.0175116
fam_history_10_yes_no	0.034458	0.0260416	0.00894421
fam_history_q10a_nerves	0.0212167	0.0240054	-0.00856601
fam_history_q10b_nerves	0.110118	0.102137	0.0529792
fam_history_q10c_nerves	0.0753425	0.0667315	0.0472804
fam_history_q10d_nerves	-0.0149188	-0.0157526	-0.0510111
fam_history_q10e_nerves	0.00775409	0.0568295	-0.00217785
fam_history_q10f_nerves	-0.0134972	0.0238091	-0.0169456
fam_history_11_yes_no	0.0128219	-0.00483996	0.00452621
fam_history_q11a_professional	0.0647323	0.00383756	0.0208445
fam_history_q11b_professional	0.10673	0.0861206	0.0428769
fam_history_q11c_professional	0.0949851	0.0496231	0.0282048
fam_history_q11d_professional	-0.0385186	-0.043363	-0.0512943
fam_history_q11e_professional	0.0241491	0.0402737	0.00176843
fam_history_q11f_professional	0.0305401	0.0149662	-0.014825
q11g_pat_uncle1_professional	0.0839617	-0.00789154	0.0930318
q11h_pat_aunt1_professional	0.0293612	0.0599129	0.0133818
q11i_mat_uncle1_professional	0.0378437	0.0286425	0.00861301
q11j_mat_aunt1_professional	0.00790767	-0.0290898	-0.0208391
q11k_full_sib_young1_prof	-0.010144	0.0228272	-0.0531271
q11l_full_sib_old1_prof	0.0050304	-0.04184	-0.0481365
fam_history_12_yes_no	0.0209663	0.0294145	0.00227612
fam_history_q12a_hospitalized	0.0052396	-0.0173586	-0.0216884
fam_history_q12b_hospitalized	0.0960318	0.0313539	0.0274679
fam_history_q12c_hospitalized	0.0536762	0.0391273	0.0417107
fam_history_q12d_hospitalized	0.0287544	-0.0382943	-0.0629511
fam_history_q12e_hospitalized	0.0127897	-0.0213145	0.00970676
fam_history_q12f_hospitalized	-0.0585472	-0.0548044	-0.0548044
fam_history_13_yes_no	0.0646567	0.0282759	0.0204954
famhx_ss_parent_alc_p	0.0474496	0.0295726	0.0354182
famhx_ss_parent_dg_p	0.063006	0.0233376	0.00983018
famhx_ss_parent_dprs_p	0.0374367	0.0458682	0.0378257
famhx_ss_parent_ma_p	0.029285	-0.012012	-0.012213
famhx_ss_parent_vs_p	0.0396898	-0.0189132	0.018107
famhx_ss_parent_trb_p	0.115956	0.0811099	0.0811663
famhx_ss_parent_nrv_p	0.0474851	0.0466256	0.0144062
famhx_ss_parent_prf_p	0.0895359	0.0865777	0.0815249
famhx_ss_parent_hspd_p	0.0434055	0.00218025	-0.00294032
famhx_ss_parent_scd_p	0.00305042	-0.0102032	0.000765734
ksads_asd_raw_562_p	0.0795206	0.082113	0.0601933
ksads_asd_raw_560_p	0.101661	0.0589174	0.0760572
ksads_asd_raw_558_p	0.0415187	0.0277094	0.0711947
ksads_pd_raw_176_p	-0.0165417	0.00202733	-0.000547244
resiliency5a_y	0.18712	0.137592	0.126611
resiliency6a_y	0.200352	0.14299	0.175522
resiliency5b_y	0.135312	0.114845	0.109102
resiliency6b_y	0.144625	0.0880606	0.135141
bisbas1_y	0.00873226	0.0337957	0.0012688
bisbas2_y	0.0746563	0.0698279	0.0770746
bisbas3_y	0.0166786	0.0379782	0.0140674
bisbas4_y	0.0401763	0.0418317	0.0139173
bisbas5_y	0.0357462	0.0215405	0.0185943
bisbas6_y	0.0509359	0.0186774	0.0370801
bisbas7_y	0.0539882	0.0305254	0.043911
bisbas8_y	0.0627185	0.0407174	0.0542919
bisbas10_y	0.0503876	0.0461709	0.0517334
bisbas9_y	-0.00811002	-0.0083296	0.00401085
bisbas11_y	0.00726572	0.0235621	0.0174156
bisbas12_y	0.0737292	0.0716373	0.0697508
bisbas13_y	0.0280711	0.0132073	0.0465766
bisbas14_y	0.1383	0.107083	0.153225
bisbas15_y	0.0717875	0.0342143	0.0424489
bisbas16_y	0.062638	0.0515899	0.0594181
bisbas17_y	0.074557	0.0419191	0.0465566
bisbas18_y	0.075879	0.040821	0.0487586
bisbas19_y	0.0352687	0.025197	0.0357274
bisbas20_y	0.0348423	0.0105208	0.0340483
bisbas5r_y	0.0231136	0.0362371	0.0259115
bis_y_ss_bis_sum	0.0466724	0.0468703	0.0420815
bis_y_ss_bas_rr	0.0813723	0.0804696	0.0867052
bis_y_ss_bas_drive	0.112172	0.0884652	0.102141
bis_y_ss_bas_fs	0.0826921	0.0641366	0.0672655
bis_y_ss_bism_sum	0.0358745	0.0457906	0.0330467
bis_y_ss_basm_rr	0.0737115	0.0737381	0.0733289
bis_y_ss_basm_drive	0.113411	0.0871879	0.101274
ksads_gad_raw_271_t	-0.0089512	0.00843444	-0.00107626
asr_q01_p	0.0245241	0.0482511	0.0284359
asr_q02_p	0.0283309	-0.0113994	-0.00722124
asr_q03_p	0.0377542	0.042058	0.0212106
asr_q04_p	0.0317218	0.00960243	0.0436822
asr_q05_p	0.0133087	0.0153641	-0.00407436
asr_q06_p	0.0537282	0.0317746	0.017146
asr_q07_p	0.0283614	-0.00670949	0.00631077
asr_q08_p	0.0435283	0.0201854	0.0459884
asr_q09_p	0.0508451	0.0159228	0.0301716
asr_q10_p	-0.000494474	0.022307	0.0174241
asr_q11_p	0.015275	0.0249092	-0.00239853
asr_q12_p	0.0294087	0.0218655	0.0375696
asr_q13_p	0.0341435	-0.000281252	0.0221033
asr_q14_p	0.0815526	0.0435381	0.0469151
asr_q15_p	0.0512856	0.0296099	0.0486715
asr_q16_p	0.0452685	0.0105794	0.0160838
asr_q17_p	9.9818e-05	0.0501287	0.035806
asr_q18_p	-0.0292385	-0.0345973	-0.0345973
asr_q19_p	0.018793	0.0108395	-0.00111598
asr_q20_p	0.026072	0.0056209	0.020409
asr_q21_p	0.00493482	0.0137765	-0.0173297
asr_q22_p	0.0708032	0.00963987	0.0546231
asr_q23_p	-0.0303353	-0.00782438	-0.00302844
asr_q24_p	0.0746057	0.0544085	0.0591819
asr_q25_p	0.0400169	0.0181001	0.0538946
asr_q26_p	0.0414654	0.0166956	0.0313962
asr_q27_p	0.0797186	0.0724201	0.0727398
asr_q28_p	0.0274532	0.0131845	0.00856176
asr_q29_p	0.145405	0.109374	0.118094
asr_q30_p	0.0813315	0.0618191	0.0382777
asr_q31_p	0.00661537	0.00304457	0.0118822
asr_q32_p	0.0525184	0.0750059	0.0426015
asr_q33_p	0.0784939	0.0416727	0.0528614
asr_q34_p	0.0524653	0.0342561	0.0194162
asr_q35_p	0.0397903	0.0235548	0.0219957
asr_q36_p	0.0341051	0.0232715	0.0137032
asr_q37_p	0.020984	0.00387802	-0.0113603
asr_q38_p	0.0446883	0.00937164	-0.00053371
asr_q39_p	0.0414126	0.00236561	0.0140858
asr_q40_p	-0.00802464	0.0106845	-0.0114088
asr_q41_p	0.00643099	0.0135571	-0.00693818
asr_q42_p	0.0198437	0.0074063	0.0197959
asr_q43_p	-0.0171613	0.00873523	0.0312299
asr_q44_p	0.0751643	0.0738985	0.0513439
asr_q45_p	0.0524171	0.0200803	0.0274883
asr_q46_p	0.0462178	0.0129006	0.0217096
asr_q47_p	0.0564977	0.0468165	0.0682017
asr_q48_p	0.0159332	-0.00597406	0.00166742
asr_q49_p	0.0731051	0.0847195	0.0836753
asr_q50_p	0.0226866	0.00919219	0.0273781
asr_q51_p	0.0378626	-0.0210044	0.000920634
asr_q52_p	0.0391309	0.0139276	0.0312585
asr_q53_p	-0.0238527	0.0192493	0.00575028
asr_q54_p	0.0298223	0.0113515	0.0447794
asr_q55_p	0.0889224	0.0457447	0.0687253
asr_q56a_p	0.0453869	0.0300805	0.0444977
asr_q56b_p	0.0493357	0.0469076	0.0558766
asr_q56c_p	0.0623187	0.0330279	0.044078
asr_q56d_p	0.0490165	0.0451516	0.0468108
asr_q56e_p	-0.0296317	-0.02862	-0.00488577
asr_q56f_p	0.0270442	0.00448584	0.0100759
asr_q56g_p	0.0498944	-0.00355627	0.019852
asr_q56h_p	0.0306586	0.00367125	0.0113637
asr_q56i_p	0.0475441	0.035639	0.0102215
asr_q57_p	0.0191385	-0.0260777	-0.0316694
asr_q58_p	0.0487465	0.0713065	0.0535172
asr_q59_p	0.00604173	0.0407701	0.0205724
asr_q60_p	0.0495852	0.0279708	0.0136689
asr_q61_p	0.0019291	-0.00986354	0.00795106
asr_q62_p	0.022025	0.00823195	0.0409537
asr_q63_p	0.165688	0.0912093	0.13554
asr_q64_p	0.00702745	0.0138116	0.0288705
asr_q65_p	0.0375122	0.015704	0.0415543
asr_q66_p	0.0485042	0.00566987	0.0320446
asr_q67_p	-0.00705052	-0.00408112	0.0138626
asr_q68_p	0.0405006	0.0484409	0.0346381
asr_q69_p	0.102133	0.081022	0.0871657
asr_q70_p	-0.00207212	-0.00628955	-0.0132391
asr_q71_p	0.0547674	0.0570639	0.0627371
asr_q72_p	0.08246	0.0462571	0.0407636
asr_q73_p	0.105824	0.0747004	0.111876
asr_q74_p	0.00574748	0.00573895	0.0258492
asr_q75_p	0.0200195	0.0249042	0.0109804
asr_q76_p	-0.0182077	0.010508	-0.00251921
asr_q77_p	-0.00900797	0.0288596	0.00616305
asr_q78_p	0.0468913	0.055107	0.0316898
asr_q79_p	0.0309447	0.0263804	0.0333092
asr_q80_p	-0.00769447	-0.0184474	-0.0114315
asr_q81_p	0.0545941	0.0406436	0.0147605
asr_q82_p	0.0236442	-0.00726908	-0.0315448
asr_q83_p	0.0825706	0.0630561	0.054558
asr_q84_p	0.070494	0.0322584	0.0247548
asr_q85_p	0.0428267	0.0347956	0.0118203
asr_q86_p	0.0659804	0.0185649	-0.00909269
asr_q87_p	0.0826264	0.0336912	0.0355684
asr_q88_p	0.107031	0.0701218	0.0928246
asr_q89_p	-0.0157303	-0.0314397	0.0377757
asr_q90_p	0.0570687	0.00470081	0.0512872
asr_q91_p	-0.0222927	-0.0207519	-0.0198671
asr_q92_p	0.0130444	0.00122754	-0.00103167
asr_q93_p	0.00640199	0.0251387	0.00420415
asr_q94_p	0.0487682	0.0482057	0.0180214
asr_q95_p	0.0368241	0.0335394	0.00409534
asr_q96_p	0.0214503	0.0287611	0.0068712
asr_q97_p	0.011706	0.00317063	0.0111997
asr_q98_p	0.0656019	-0.00807358	0.0470865
asr_q99_p	0.0453639	0.0483807	0.0262568
asr_q100_p	0.00252123	-9.3786e-05	0.000998206
asr_q101_p	0.0287742	0.0254365	0.0431634
asr_q102_p	0.0380139	0.054155	0.0219847
asr_q103_p	0.0454223	0.0244378	0.0376664
asr_q104_p	0.0350699	0.0112989	0.00762333
asr_q105_p	0.0140746	0.0255108	0.0283823
asr_q106_p	0.130405	0.0915289	0.12373
asr_q107_p	0.0659846	0.0308134	0.0527095
asr_q108_p	0.035078	0.0120499	0.0351926
asr_q109_p	0.012245	-0.00848502	0.00215945
asr_q110_p	0.0225026	0.00889819	-0.0080917
asr_q111_p	0.0739207	0.0328345	0.0305518
asr_q112_p	0.0212495	0.0172802	0.00673782
asr_q113_p	0.0239459	0.0495372	0.0116056
asr_q114_p	0.11101	0.0463838	0.0923626
asr_q115_p	0.0380953	0.00910269	0.0193587
asr_q116_p	0.0302958	0.0192931	0.0169993
asr_q117_p	0.0943502	0.0504169	0.0647049
asr_q118_p	0.00699421	0.0364011	-0.00492045
asr_q119_p	-0.00187334	-0.00240685	0.036225
asr_q120_p	0.0421064	0.03616	0.0455785
asr_q121_p	0.0255133	-0.00516256	0.0347741
asr_q122_p	0.0957247	0.0663051	0.0744365
asr_q123_p	0.0736668	0.0482871	0.065014
asr_q124_p	0.110538	0.0520985	0.0215452
asr_q125_p	-0.0160865	-0.015284	-0.0110648
asr_q126_p	0.0324919	-0.0175016	-0.00643259
asr_scr_perstr_r	0.135102	0.103633	0.142544
asr_scr_perstr_t	0.0887371	0.0695417	0.0874442
asr_scr_anxdep_r	0.0753881	0.0248161	0.0464264
asr_scr_anxdep_t	0.0640008	0.0185106	0.0313356
asr_scr_withdrawn_r	0.0943185	0.0787054	0.0604011
asr_scr_withdrawn_t	0.0897442	0.0655821	0.0413874
asr_scr_somatic_r	0.0819799	0.0445286	0.0581608
asr_scr_somatic_t	0.0722594	0.0292726	0.0606161
asr_scr_thought_r	0.121954	0.0735521	0.069137
asr_scr_thought_t	0.0949777	0.0324615	0.0385751
asr_scr_attention_r	0.0245418	0.0731973	0.0226362
asr_scr_attention_t	0.0145077	0.061048	0.0221631
asr_scr_aggressive_r	0.0670687	0.0296397	0.0222409
asr_scr_aggressive_t	0.0469407	0.0223599	-0.0175398
asr_scr_rulebreak_r	0.0995065	0.0357123	0.0589263
asr_scr_rulebreak_t	0.0648553	0.0271009	0.0294649
asr_scr_intrusive_r	0.042153	0.0352564	0.00912723
asr_scr_intrusive_t	0.0519437	0.0323414	0.0279363
asr_scr_internal_r	0.0926648	0.0602076	0.0634254
asr_scr_internal_t	0.0776257	0.0415715	0.0287632
asr_scr_external_r	0.0899527	0.0467946	0.0245602
asr_scr_external_t	0.058238	0.0233606	-0.0123791
asr_scr_totprob_r	0.0953755	0.0667254	0.0496803
asr_scr_totprob_t	0.0733115	0.0533087	0.0165891
asr_scr_depress_r	0.0766247	0.045196	0.051813
asr_scr_depress_t	0.0739569	0.0495839	0.0235884
asr_scr_anxdisord_r	0.064713	0.0367986	0.04183
asr_scr_anxdisord_t	0.0477904	0.00690468	0.00631409
asr_scr_somaticpr_r	0.0852732	0.0490458	0.0379751
asr_scr_somaticpr_t	0.0744514	0.0421985	0.0510118
asr_scr_avoidant_r	0.0714568	0.0395915	0.0380089
asr_scr_avoidant_t	0.0635231	0.0340916	0.0231291
asr_scr_adhd_r	0.037134	0.0452122	0.0330669
asr_scr_adhd_t	0.0337378	0.0428698	0.0122868
asr_scr_antisocial_r	0.0763823	0.0300741	0.0396602
asr_scr_antisocial_t	0.0419412	0.0327292	0.0202102
asr_scr_inattention_r	0.0375516	0.0551801	0.0342779
asr_scr_inattention_t	0.0423882	0.0644826	0.0307128
asr_scr_hyperactive_r	0.0345888	0.0370393	0.0209237
asr_scr_hyperactive_t	0.0228657	0.0203352	0.00370903
ksads_sleepprob_raw_814_p	0.0418176	0.0287336	0.0432916
ksads_sleepprob_raw_814_t	0.0249271	0.026807	0.0177314
ksads_dp_raw_101_p	0.131174	0.0913219	0.101785
ksads_dp_raw_98_p	0.0670997	0.0390709	0.0616739
ksads_dp_raw_95_p	0.0643248	0.00771649	0.0224987
cbcl_q01_p	0.0611411	0.056892	0.022182
cbcl_q02_p	-0.0308216	-0.00693224	-0.0334087
cbcl_q03_p	0.0786161	0.0263057	0.0525185
cbcl_q04_p	0.0635542	0.0657695	0.0174402
cbcl_q05_p	0.011381	0.0104794	0.0545333
cbcl_q06_p	-0.0257719	0.0110167	0.00711926
cbcl_q07_p	0.0591024	0.0596072	0.0477649
cbcl_q08_p	0.130818	0.0959742	0.0809687
cbcl_q09_p	0.0807398	0.0656072	0.0427495
cbcl_q10_p	0.132573	0.0985355	0.0850753
cbcl_q11_p	0.12017	0.0944956	0.0852395
cbcl_q12_p	0.0500288	0.0382566	0.0251518
cbcl_q13_p	0.032801	0.0437622	0.0215415
cbcl_q14_p	0.07711	0.060755	0.0463154
cbcl_q15_p	0.00629945	-0.0129142	-0.0446612
cbcl_q16_p	0.0535609	0.0198462	0.036086
cbcl_q17_p	0.0450793	0.0555032	0.0331617
cbcl_q18_p	-0.00330917	-0.0326527	-0.0122691
cbcl_q19_p	0.0839018	0.0437455	0.0511893
cbcl_q20_p	0.116366	0.0644019	0.0423239
cbcl_q21_p	0.0995486	0.0544472	0.0423093
cbcl_q22_p	0.0576889	0.00101016	0.0582859
cbcl_q23_p	0.149498	0.091028	0.122053
cbcl_q24_p	0.0834899	-0.00416052	0.0480014
cbcl_q25_p	0.0709886	0.0260388	0.0394644
cbcl_q26_p	0.0421703	0.024325	0.0422585
cbcl_q27_p	0.0535067	-0.0134306	0.0559154
cbcl_q28_p	0.0975868	0.0597798	0.0694689
cbcl_q29_p	0.0671404	0.0261128	0.056532
cbcl_q30_p	0.00470153	-0.0231823	0.0138295
cbcl_q31_p	-0.0154741	-0.00332838	0.00733713
cbcl_q32_p	0.0464217	0.0232268	0.0322911
cbcl_q33_p	0.00260348	-0.000518746	0.0220363
cbcl_q34_p	0.0105191	-0.00353229	0.000232343
cbcl_q35_p	0.0147883	0.0108956	0.026333
cbcl_q36_p	0.00113409	0.0118016	-0.00325537
cbcl_q37_p	0.0871524	0.0804867	0.0568283
cbcl_q38_p	0.0831273	0.0409143	0.0577538
cbcl_q39_p	0.0788542	0.0452991	0.0827512
cbcl_q40_p	0.0250405	0.00445268	-0.0290154
cbcl_q41_p	0.0965333	0.0509514	0.0510986
cbcl_q42_p	0.0128227	0.0271234	0.0442323
cbcl_q43_p	0.0828492	0.0553041	0.0696126
cbcl_q44_p	0.0199927	0.0150492	0.0485925
cbcl_q45_p	0.00241705	0.0115299	0.0171613
cbcl_q46_p	0.00306431	0.0225794	0.00703535
cbcl_q47_p	0.0216072	0.0156233	0.012929
cbcl_q48_p	0.0331729	0.0187545	0.0100666
cbcl_q49_p	0.00386724	0.0108707	-0.00085344
cbcl_q50_p	0.035441	0.0257495	0.0367703
cbcl_q51_p	-0.00643524	-0.00213965	-0.00388493
cbcl_q52_p	-0.0337536	-0.00217065	0.0201663
cbcl_q53_p	0.28385	0.0868457	0.107515
cbcl_q54_p	0.0659825	0.0319365	1.79502e-05
cbcl_q55_p	0.40754	0.131365	0.132051
cbcl_q56a_p	0.0254335	0.0277364	0.0154984
cbcl_q56b_p	0.0384908	0.00442786	0.0512692
cbcl_q56c_p	0.00383313	0.000486269	-0.0137605
cbcl_q56d_p	0.00519739	0.0260157	0.019895
cbcl_q56e_p	0.00812233	-0.032513	0.00496239
cbcl_q56f_p	0.0452736	-0.00406611	0.0127425
cbcl_q56g_p	-0.0366319	-0.0134228	-0.0228565
cbcl_q56h_p	-0.0228081	-0.0228284	0.0206696
cbcl_q57_p	0.0581582	0.0307144	0.0262416
cbcl_q58_p	0.079649	0.06907	0.0476248
cbcl_q59_p	-0.0242866	0.00935922	-0.0302026
cbcl_q60_p	0.0115301	-0.0187086	-0.00310101
cbcl_q61_p	0.0775755	0.0520829	0.0597847
cbcl_q62_p	0.0641899	0.0503314	0.055661
cbcl_q63_p	0.078452	0.0288079	0.0495384
cbcl_q64_p	0.0799566	0.0414735	0.0579525
cbcl_q65_p	0.039284	0.0260889	0.0336439
cbcl_q66_p	0.0553089	0.0592906	0.0582287
cbcl_q67_p	-0.022224	0.00737194	-0.02556
cbcl_q68_p	0.0693705	0.0214391	0.0388019
cbcl_q69_p	0.0745513	0.0349881	0.0300943
cbcl_q70_p	-0.00903967	0.00968646	-0.0264126
cbcl_q71_p	0.0532395	0.0215479	0.0387553
cbcl_q72_p	-0.0066148	0.0104852	-0.00897648
cbcl_q73_p	-0.0267142	-0.0268906	-0.0295821
cbcl_q74_p	0.119303	0.0747822	0.0646859
cbcl_q75_p	0.0602273	0.0569791	0.0588861
cbcl_q76_p	-0.000143166	0.010598	0.0121825
cbcl_q77_p	0.0276964	0.0196044	0.0132567
cbcl_q78_p	0.0979107	0.0906273	0.0542658
cbcl_q79_p	0.0538431	0.0437197	0.0412539
cbcl_q80_p	0.0336003	0.0125514	0.0197599
cbcl_q81_p	0.0634431	0.00659465	0.00644302
cbcl_q82_p	0.0578622	0.0158037	0.0276807
cbcl_q83_p	0.051862	0.0357698	0.0486609
cbcl_q84_p	0.0247644	0.0200877	0.00531263
cbcl_q85_p	0.0462866	0.0152995	0.0259452
cbcl_q86_p	0.00478185	-0.00668179	0.022536
cbcl_q87_p	0.0390992	0.0132607	0.0471888
cbcl_q88_p	0.0473697	0.0094994	0.0224307
cbcl_q89_p	0.0153235	0.00810084	0.00532792
cbcl_q90_p	0.0514125	0.0291615	0.0150717
cbcl_q91_p	-0.0141382	-0.0038928	-0.00900621
cbcl_q92_p	0.0330603	0.0127147	0.00570377
cbcl_q93_p	0.0784272	0.0484652	0.0764998
cbcl_q94_p	0.0490063	0.0250499	0.0151618
cbcl_q95_p	0.0480036	0.0239164	0.0331167
cbcl_q96_p	-0.0182063	-0.0350688	-0.0383171
cbcl_q97_p	0.0213831	0.0223385	0.0131018
cbcl_q98_p	0.0460952	-0.00465795	0.00601403
cbcl_q100_p	0.01329	0.0421053	0.0228388
cbcl_q101_p	-0.0245833	-0.0245833	-0.0245833
cbcl_q102_p	0.0902264	0.033086	0.0167588
cbcl_q103_p	0.027827	0.00941443	0.0346691
cbcl_q104_p	0.0500051	-0.00127129	0.0158894
cbcl_q105_p	0	0	0
cbcl_q106_p	0.0202846	0.00433356	-0.0107566
cbcl_q107_p	-0.0119979	0.00024992	-0.0224298
cbcl_q108_p	0.0384663	0.0232501	0.036874
cbcl_q109_p	0.060248	0.0455157	0.0135078
cbcl_q110_p	-0.0346313	-0.0398369	-0.0398369
cbcl_q111_p	0.02954	0.0175837	-0.00344193
cbcl_q112_p	0.0484595	0.0100234	0.0671221
cbcl_scr_syn_anxdep_r	0.0418663	0.0105021	0.0492099
cbcl_scr_syn_anxdep_t	0.0509812	0.0390155	0.047216
cbcl_scr_syn_withdep_r	0.0898375	0.0515878	0.0492613
cbcl_scr_syn_withdep_t	0.0977642	0.0701654	0.0672843
cbcl_scr_syn_somatic_r	0.071764	0.0199122	0.0382487
cbcl_scr_syn_somatic_t	0.073718	0.0268477	0.0471178
cbcl_scr_syn_social_r	0.130087	0.0722878	0.0661324
cbcl_scr_syn_social_t	0.130954	0.0791903	0.0708655
cbcl_scr_syn_thought_r	0.0930453	0.0815859	0.0214027
cbcl_scr_syn_thought_t	0.0814829	0.0828889	0.0304106
cbcl_scr_syn_attention_r	0.133965	0.0931278	0.0822744
cbcl_scr_syn_attention_t	0.101393	0.0610783	0.0913305
cbcl_scr_syn_rulebreak_r	0.14072	0.0692915	0.0907458
cbcl_scr_syn_rulebreak_t	0.131077	0.0720021	0.0987662
cbcl_scr_syn_aggressive_r	0.119192	0.0448237	0.0576023
cbcl_scr_syn_aggressive_t	0.110213	0.0543469	0.039848
cbcl_scr_syn_internal_r	0.0733119	0.0329654	0.0480354
cbcl_scr_syn_internal_t	0.0935484	0.0254068	0.0664899
cbcl_scr_syn_external_r	0.131635	0.0557863	0.067916
cbcl_scr_syn_external_t	0.117556	0.0493847	0.0754912
cbcl_scr_syn_totprob_r	0.131859	0.0732201	0.0576798
cbcl_scr_syn_totprob_t	0.120803	0.0688706	0.0517007
cbcl_scr_dsm5_depress_r	0.0479508	0.0371844	0.0386695
cbcl_scr_dsm5_depress_t	0.0445944	0.0299749	0.0408517
cbcl_scr_dsm5_anxdisord_r	0.06191	0.0266026	0.0558486
cbcl_scr_dsm5_anxdisord_t	0.057943	0.0484644	0.0438954
cbcl_scr_dsm5_somaticpr_r	0.0703841	0.0205932	0.0354389
cbcl_scr_dsm5_somaticpr_t	0.0695234	0.0301648	0.0192603
cbcl_scr_dsm5_adhd_r	0.133956	0.0923612	0.0676756
cbcl_scr_dsm5_adhd_t	0.103341	0.0642522	0.0641124
cbcl_scr_dsm5_opposit_r	0.0826342	0.0306289	0.0535696
cbcl_scr_dsm5_opposit_t	0.0869406	0.0373473	0.0412688
cbcl_scr_dsm5_conduct_r	0.13211	0.0789443	0.0748673
cbcl_scr_dsm5_conduct_t	0.11948	0.0664164	0.0834615
cbcl_scr_07_sct_r	0.049523	0.0361013	0.0753765
cbcl_scr_07_sct_t	0.0516437	0.0468625	0.0564877
cbcl_scr_07_ocd_r	0.0544648	0.0539746	0.0523493
cbcl_scr_07_ocd_t	0.0395692	0.0544484	0.0483832
cbcl_scr_07_stress_r	0.0965183	0.071004	0.0627047
cbcl_scr_07_stress_t	0.0860382	0.0655497	0.0570515
upps6_y	0.0246632	0.00843521	0.0415634
upps7_y	0.0370602	0.0336443	0.0557025
upps11_y	0.055885	0.00987349	0.049443
upps12_y	0.0792756	0.0292221	0.0587229
upps15_y	-0.0169703	-0.0140916	0.0163811
upps16_y	0.0292873	0.0142565	0.0125265
upps17_y	7.63383e-05	-0.000803693	0.0439359
upps18_y	0.0605603	0.0313001	0.0208816
upps19_y	0.00855253	0.00510586	0.0353747
upps20_y	-0.00298526	-0.03355	0.0167134
upps21_y	0.0337256	0.0625666	0.0427819
upps22_y	0.00226164	0.0212724	0.0221554
upps23_y	0.0428408	0.0126067	0.0417442
upps24_y	-0.0100084	-0.0208558	0.0229021
upps27_y	0.0961083	0.0930449	0.0615864
upps28_y	0.0521085	0.0206763	0.0647552
upps35_y	0.0365789	0.00344474	0.0404333
upps36_y	0.0932639	0.0558356	0.0997391
upps37_y	0.0300302	0.00168908	0.0542271
upps39_y	0.0993579	0.0719479	0.0896531
upps_y_ss_negative_urgency	0.0514986	-0.00912581	0.0452945
upps_y_ss_negative_urgency_nm	0.0187031	-0.0363962	-0.0363962
upps_y_ss_lack_of_planning	0.0687116	0.0318808	0.0653114
upps_y_ss_lack_of_planning_nm	-0.0123344	-0.017844	-0.0359837
upps_y_ss_sensation_seeking	0.0910075	0.077955	0.0792415
upps_y_ss_positive_urgency	0.0939058	0.0614654	0.0764776
upps_y_ss_lack_of_perseverance	-0.00256944	0.0169458	0.0420546
ksads_suicidal_raw_819_t	-0.000650571	-0.0167396	0.0166825
ksads_suicidal_raw_823_t	0.0331604	0.00629316	0.0025789
ksads_suicidal_raw_827_t	-0.00654458	-0.0199502	0.00830154
kbi_p_c_live_full_time	0.0298047	0.00562717	0.0202028
kbi_p_conflict	0.0228431	0.00705154	0.023924
kbi_p_c_school_setting	0.0587228	0.0562227	0.0521444
kbi_p_how_well_c_school	0.140939	0.0907517	0.111379
kbi_p_grades_in_school	0.0941687	0.0736716	0.0763222
kbi_p_c_drop_in_grades	0.0771883	0.0438869	0.0484967
kbi_p_c_det_susp	-0.008764	-0.0216081	-0.0331168
kbi_p_c_best_friend	0.0526907	0.0422959	0.0441474
kbi_p_c_best_friend_len	0.0643815	0.0731092	0.0419167
kbi_p_c_reg_friend_group	0.119623	0.0773343	0.0799275
kbi_p_c_reg_friend_group_len	0.0633638	0.0458186	0.0568063
kbi_p_c_reg_friend_group_opin	0.0915695	0.0266568	0.0759805
kbi_p_c_gay	0.079453	0.0555179	0.0798375
kbi_p_c_trans	-0.00294404	-0.0308794	-0.0308794
kbi_p_c_mh_sa	0.0426994	0.0322367	0.0623027
kbi_ss_c_mental_health_p	0.0189523	0.00421238	-0.0211049
ksads_sa_raw_1836_p	-0.0447171	-0.0189855	0.0409458
ksads_sa_raw_197_p	0.077785	0.0396768	0.0662608
ksads_sa_raw_200_p	0.0750908	0.0648315	0.0650387
ksads_cdr_466_p	0.0979354	0.0600313	0.0752129
ksads_cdr_469_p	-0.011928	-0.0319201	-0.0319201
ksads_cdr_473_p	0.0729094	0.0447192	0.0471968
ksads_cdr_478_p	0.0056136	0.00798517	-0.00543829
ksads_cdr_481_p	-0.00432905	-0.0210267	-0.0210267
ksads_cdr_1047_p	-0.0502073	-0.0502073	-0.0502073
ksads_cdr_1050_p	-0.0632328	-0.0013281	0
ksads_cdr_1053_p	-0.0820081	-0.0820081	-0.0820081
ksads_cdr_1056_p	0.0137228	0.0704199	0.0256537
ksads_cdr_1059_p	-0.0107658	-0.0186734	-0.0506539
ksads_cdr_1064_p	-0.0250498	-0.009475	-0.0396843
ksads_cdr_1067_p	-0.0192385	0.0242864	0.010104
ksads_cdr_1070_p	0.00528992	-0.0499071	-0.0499071
ksads_cdr_1073_p	-0.0420428	0.00194208	-0.0420428
ksads_bd_raw_129_t	0	0	-0.0251185
ksads_bd_raw_126_t	0.0432877	0.0338667	0.0129759
ksads_bd_raw_122_t	0.0200005	0.0172757	0.0286353
ksads_bd_raw_119_t	0.0481678	0.0197361	0.0339819
ksads_eatingdis_raw_371_p	0.141199	0.0604375	0.0425793
ksads_eatingdis_raw_368_p	0.0830576	0.0566241	0.0324321
ksads_eatingdis_raw_365_p	0.0151838	0.00126003	-0.0325949
ksads_eatingdis_raw_358_p	0.207356	0.062829	0.0467949
pps_y_ss_number	0.140303	0.095017	0.121602
pps_y_ss_number_nm	-0.0245736	-0.0245736	-0.0245736
pps_y_ss_bother_sum	0.0657698	0.0299824	0.0761032
pps_y_ss_bother_sum_nm	0.135606	0.0972861	0.121694
pps_y_ss_bother_n_1	0.0361219	0.0568846	0.0566811
pps_y_ss_bother_n_1_nm	0.134125	0.10242	0.120943
pps_y_ss_severity_score	0.125116	0.0738069	0.112496
pps_y_ss_severity_score_nm	0.129334	0.0800675	0.120648
pps_ss_mean_severity	0.0494972	0.0608428	0.0734024
ksads_dp_raw_101_t	0.0750517	0.0472582	0.0670084
ksads_dp_raw_98_t	0.0125821	0.0317182	0.0324058
ksads_dp_raw_95_t	0.0461909	0.0325138	0.0486004
ksads_sad_raw_209_t	0.0285472	0.00436765	-0.0164285
bpmt_q1	0.13977	0.0785849	0.0691719
bpmt_q2	0.127894	0.0370285	0.0657087
bpmt_q3	0.1589	0.0783521	0.131335
bpmt_q4	0.168948	0.0960743	0.108736
bpmt_q5	0.180279	0.0925511	0.101088
bpmt_q6	0.0851085	0.0501121	0.0195999
bpmt_q7	0.168415	0.0856726	0.121776
bpmt_q8	0.0691897	0.0258426	0.0249516
bpmt_q9	0.210635	0.103299	0.122272
bpmt_q10	0.0289052	0.0334339	-0.00122796
bpmt_q11	0.0376842	0.0140861	0.0308728
bpmt_q12	0.051415	0.0459811	0.0302149
bpmt_q13	0.197458	0.0940455	0.151497
bpmt_q14	0.135343	0.0753515	0.0738764
bpmt_q15	0.118329	0.0347303	0.0451242
bpmt_q16	0.133669	0.0379806	0.0962569
bpmt_q17	0.0477861	0.0239933	0.0416295
bpmt_q18	0.0135734	0.0280726	-0.0256806
bpmt_sent_count	0.117817	0.0841181	0.0919812
bpm_t_scr_attention_r	0.222102	0.104061	0.149558
bpm_t_scr_attention_t	0.152001	0.0803557	0.169788
bpm_t_scr_attention_nm	0.181598	0.177677	0.157388
bpm_t_ss_attention_mean	0.232061	0.131829	0.176386
bpm_t_ss_attention_nm	0.18179	0.170139	0.158508
bpm_t_scr_internal_r	0.0886886	0.0842314	0.0236486
bpm_t_scr_internal_t	0.0952944	0.0700946	-0.0137866
bpm_t_scr_internal_nm	0.178748	0.170339	0.150818
bpm_t_ss_internal_mean	0.0778192	0.0558249	0.00514702
bpm_t_ss_internal_nm	0.180863	0.172881	0.154347
bpm_t_scr_external_r	0.179224	0.0841954	0.105112
bpm_t_scr_external_t	0.17445	0.0973262	0.12226
bpm_t_scr_external_nm	0.180633	0.176111	0.152414
bpm_t_ss_external_mean	0.186306	0.101181	0.0867049
bpm_t_ss_external_nm	0.18047	0.173007	0.152744
bpm_t_scr_totalprob_r	0.21324	0.104052	0.146784
bpm_t_scr_totalprob_t	0.191183	0.131213	0.157074
bpm_t_scr_totalprob_nm	0.179492	0.174734	0.150557
bpm_t_ss_totalprob_mean	0.217528	0.125757	0.127818
bpm_t_ss_totalprob_nm	0.181193	0.17615	0.155087
ksads_sad_raw_209_p	0.0158814	-0.00636449	-0.00026438
ksads_suicidal_raw_819_p	-0.0309626	-0.0365916	-0.0357151
ksads_suicidal_raw_823_p	-0.037718	-0.0220362	-0.0237971
ksads_suicidal_raw_827_p	-0.0514033	-0.065694	-0.0209518
ksads_adhd_raw_414_p	0.139673	0.103568	0.0840087
ksads_adhd_raw_419_p	0.102252	0.0599154	0.0870076
ksads_adhd_raw_409_p	0.0843852	0.0687181	0.040225
ksads_adhd_raw_404_p	0.112385	0.0780011	0.0664489

## Sheet: Table 5-GWAS
#CHROM	POS	ID	P	TOTAL	NONSIG	S0.05	S0.01	S0.001	S0.0001	SP2	IC number	Cluster number
1	180905694	rs3795503	8.35717e-11	96	59	14	11	2	10	rs1609829	1	6
1	215141570	rs10494988	3.41804e-09	176	40	89	14	19	14	rs6540873,rs1452628	1	6
10	21821918	rs12251016	9.12567e-18	381	0	12	46	14	309	rs4399235,rs35156049,rs35097657,rs12768155,rs12775103,rs12769344,rs12775448,10:21705043_AAAAG_A,10:21706984_AT_A,rs12770588,rs12098603,rs12761415,rs12781438,rs201675637,rs12767955,rs61849986,rs766286413,rs12767504,rs12763166,rs12769257,rs10508638,rs7077149,rs142125567,rs12776518,rs71491182,rs61850011,rs34119904,rs12770245,rs11596452,rs35708372,rs12775112,rs11012712,rs12783805,rs11012714,rs6185001…	1	6
10	13063979	rs12146173	4.56199e-08	104	46	7	26	2	23	rs11258136	1	6
11	27509136	rs11030025	2.22426e-08	396	161	12	20	72	131	.	1	6
12	106476805	rs12146713	1.5712e-09	128	7	11	10	89	11	rs12370774	1	6
15	58250246	rs3784264	1.21882e-08	326	5	3	9	31	278	rs10851630,rs10851631,rs7495968,rs9325,rs3204689,rs4646640,rs12910113,rs4646638,rs4646614,15:58267416_GACAT_G,rs11857461,rs2899611,15:58343557_TTTTA_T	1	6
16	87225101	rs9937293	9.19713e-20	169	0	2	24	15	128	16:87221841_ATG_A,rs9888792,rs111864226,rs12711472,rs12711473,rs9308341,rs9308342,rs9308343,rs9308344,rs4843227,rs4843560,rs4843226,rs4843559,rs4843558,rs4843557,rs7205039,rs9933149,rs12921714,rs12921347,rs12920553,rs12922411,rs12921170,rs4843556,rs7196520,rs7203251,rs56023709,rs6540016,rs7185688,rs11644651,rs7191546,rs6540017,rs11860417,rs4843555,rs12149643,rs4843554,rs4843553,rs4843552,rs804756…	1	6
16	2162887	rs2369068	6.54716e-09	100	16	17	14	24	29	rs116092985,rs74331768,rs75510884,rs2549677,rs11861948,rs28605000	1	6
22	21145979	rs165825	9.55502e-11	632	13	12	207	20	380	rs4822429,rs4820558,rs488506,rs490365,rs520698,rs9608279,rs552668,rs499113,rs598141,rs565979,rs479275,rs511527,rs542771,22:21031583_GT_G,rs672235,rs491228,rs853148,rs591446,rs637335,rs639715,rs9612645,rs515841,rs517789,rs853152,rs8136537,rs165817,rs140466,rs4052260,rs5760087,rs853295,rs4820573,rs5751786,rs6004026,rs1807692,rs5760196,rs5760197,rs13054456,rs4361213,rs9608348,rs5751802,rs11462205,rs…	1	6
3	45814094	rs17279437	4.15079e-15	144	4	27	38	46	29	rs140846169,rs80163550,rs73058498,rs571706177,rs73060324,3:45795731_CTCTT_C,rs532687890,rs4327428,rs9818982,rs3051635,rs73062374	1	6
4	41323954	rs71608073	9.3289e-10	103	20	2	15	30	36	.	1	6
5	122705737	rs6893539	3.46821e-14	597	130	64	112	19	272	rs426500,rs412742,rs406157,rs430148,rs382718,rs372212,rs383705,rs35890200,rs393761,rs432604,rs602648,rs412232,rs412584,rs391555,rs35043083,rs441446,rs412618,rs335158,rs10629804,rs335160,rs419771,rs335175,rs374621,rs182849,rs335173,rs335172,rs335171,rs233174,rs335169,rs233173,rs372478,rs408054,rs443382,rs335155,rs335154,rs335153,rs335152,rs335151,rs335150,rs335149,rs335148,rs394782,rs173028,rs6857…	1	6
5	122496931	rs459743	5.80575e-13	197	0	10	9	29	149	rs201039699,rs335170,rs1685201,rs10670773,rs459530,rs466970,rs462210,rs58972771,rs162953,rs335214,rs335213,rs335211,rs463106,rs456467,rs335208,rs335206,rs335205,rs335204,rs335201,rs179805,rs35404140,rs7702622,rs61394003,rs562297143,rs11954944,5:122624476_CT_C,rs2897737,rs4836523,rs4836524,rs7711615,rs12658966,rs72789810	1	6
5	122446619	rs151283	1.6058e-09	215	26	43	60	17	69	rs7721182,rs335145,rs335189	1	6
5	2387281	rs2019736	1.56562e-08	76	3	0	47	8	18	rs931283	1	6
5	122351493	rs10080107	2.46991e-08	609	145	99	70	94	201	.	1	6
5	122613595	rs11950767	2.76633e-08	51	30	0	6	5	10	rs41446444	1	6
7	2791033	rs529794364	5.14063e-15	360	12	17	23	34	274	rs798565,rs798563,rs798562,rs798560,rs798559,rs798558,rs798557,rs798556,rs34802551,rs798555,rs798554,rs798552,rs798551,rs798550,rs798548,rs798547,7:2761349_CA_C,rs798546,rs798545,7:2762764_AAAG_A,rs798544,rs798540,rs78018097,rs798536,rs709282,rs798531,rs798528,rs798526,rs798518,rs798514,rs798513,rs798512,rs798511,rs798510,rs798508,rs798506,rs798503,rs798502,rs798500,rs798499,rs798498,rs798497,rs7…	1	6
7	120994169	rs3801383	7.16618e-11	157	69	18	10	2	58	rs10668066,rs3779381,rs2908004,rs142005327,rs2536189,rs3801387,rs55963900,rs2707466,rs10242100,rs2536185,rs3801382,rs7807953,rs7808155,rs12539772,rs56364616,rs917727,rs917726,rs718766,rs12531355,rs7776725	1	6
7	120908082	rs2536150	8.15737e-09	246	3	70	28	29	116	rs545076290,rs10268117,rs9770763,rs55694614,rs34088248,rs7799790	1	6
9	113664011	rs140589730	9.1252e-12	226	9	16	21	28	152	rs7039165,rs10817103,rs4556147,rs7874593,rs7037351,rs61044471,rs148957934,rs10759473,rs10817104,rs10817105,rs10817106,rs10980620,rs10817107,rs1326892,rs12236346,rs72764214,9:113658116_CAACAAAAGAG_C,rs72764216,rs10817108,rs1977415,rs10980623,rs10980624,rs4978966,rs1007000,rs7873106,rs72764225,rs2182578,rs10980625,rs1409684,rs1409682,9:113668459_TTA_T,rs10980628,rs10817109,rs10759474,rs4246883,rs13…	1	6
9	113629235	rs10817099	1.3344e-10	179	28	5	21	17	108	rs2509190,rs554561,rs556659,rs524953,rs560278,rs1784572,rs2846442,rs2478548,rs2501823,rs2478549,rs2501822,rs692760,rs507934,rs692839,rs72760470,rs72760471,rs550012,rs512483,rs55931626,rs10980586,rs487558,rs10980589,rs481043,rs566746,rs521881,9:113611552_GA_G,rs693089,rs526584,rs549444,rs767545600,rs10980591,rs553219,9:113612501_TA_T,rs531003,rs506113,rs484611,rs533488,rs534496,rs544242,rs2767009,…	1	6
9	114314065	rs117675298	4.07809e-09	136	29	26	37	18	26	rs10491879,rs72607186,rs4978988,rs76511628,rs78873402,rs77368608,rs112448575,rs112459516	1	6
1	47980916	rs6658111	7.79571e-28	305	0	7	22	71	205	rs61782708,rs149648316,rs12070024,rs2820971,rs2622921,rs2820974,rs2622920,rs541025167,rs7552140,rs571281,rs557851,rs1680020,rs7526434,rs10890481,rs767682581,rs527551,rs1680018,rs524158,rs67095259,rs538286,rs505399,rs11211538,rs6588397,rs12025418,rs4926556,rs6675690,rs6668106,rs6676159,rs6658691,rs7520501,rs7537074,rs7539808,rs12057975,rs12073605,rs11211540,rs11800497,rs1337524,1:47952569_TA_T,rs1…	2	5
1	215137222	rs6540873	7.13116e-10	175	16	21	89	28	21	rs1452628,rs10494988	2	5
18	42444473	rs881433	4.46832e-08	112	27	3	25	29	28	.	2	5
20	38507306	rs6028703	1.33234e-08	215	6	49	65	48	47	rs12625145	2	5
21	34126212	rs77808814	3.39376e-08	227	14	5	98	79	31	.	2	5
3	190661299	3:190661299_GA_G	1.57944e-12	172	4	13	21	16	118	rs35679428,rs13323015,rs9862175,rs6444469,rs56068001,rs9838279,rs9849583,rs1393060,rs771140446,rs749413636,rs6804748,rs2202100,rs13075101,rs6799249,rs13083648,rs28873531,rs34113929,rs6802105,rs1501600,rs866986,rs13070564,rs61500084,rs146550622,rs113180518,rs112522420,rs4624605,rs4308324,rs4308325,rs73193907,rs56234707,rs56268441,rs58531798,rs12727448,rs34886272,rs61494018,rs187620717,rs60386222,r…	2	5
3	190640663	rs12488471	2.04187e-09	90	4	18	0	1	67	rs13079050,rs13090681,rs9880346,rs62286349,rs76316471,rs9818981,rs9827488,rs9827516,rs9290959,rs9840870,rs9829689,rs28870076,rs9856237,rs9871399,rs9871595,rs35608805,rs34576065,rs9877058,3:190640157_AG_A,rs193250936,rs78362860,rs147611663,rs35618256,rs58308120,rs62288087,rs62288091,rs113627555,rs58525723,rs34734157,rs34481566,rs13061231,rs7616662,rs62288106,rs13325955,rs28671590	2	5
6	44913863	rs12525773	1.76918e-10	1143	137	271	463	9	263	rs2396326,rs2894599,rs66642874,rs34817919,rs16872574,rs72664273,rs67597621,rs72664274,rs5875895,rs2139863,rs3799965,rs113477276,6:44799892_CT_C,rs9472376,rs3799969,rs3799970,rs3823252,rs16869119,rs13202672,rs13206526,rs4714827,rs3799972,rs3799974,rs34243039,rs35856781,6:44844371_CCTAAAA_C,rs9463048,rs112778827,rs9472391,rs9472393,rs9463051,rs59606274,rs75274590,rs12530016,rs185656703,rs28843161,r…	2	5
6	151010991	6:151010991_CA_C	6.67735e-09	335	20	58	61	125	71	.	2	5
7	121033121	rs7776725	6.77233e-15	158	67	9	9	4	69	rs10276111,rs10233441,rs112901683,rs7809135,rs10250475,rs6961083,rs7794940,rs7795061,rs7778200,rs10241888,rs2707521,rs71170242,rs10282303,rs34155977,rs1547960,rs1547959,rs6980043,rs6947246,rs35883000,rs6952851,rs10277699,rs10231005,rs2707518,rs10254825,rs2536201,rs2908008,rs10234624,rs2536196,rs2536195,rs62476338,rs2908007,rs10668066,rs3779381,rs2908004,rs142005327,rs2536189,rs3801387,rs55963900,…	2	5
7	19550247	rs12534570	4.79541e-09	364	72	1	2	8	281	rs10245919,rs6949428,rs10242068,rs4472416,rs4472417,rs2892936,rs777923063,rs10224067,rs4719572,rs4719573,rs28460797,rs574793622,rs60820892,rs4721802,rs7795929,rs4518562,rs4329170	2	5
8	10612925	rs4840514	2.17602e-08	1095	115	66	189	229	496	rs11250076	2	5
8	9083433	rs2929455	3.98782e-08	1747	313	353	452	353	276	.	2	5
1	215139887	rs1452628	1.24044e-19	177	5	13	16	8	135	rs755576,rs6540873,rs562410,rs476557,rs507072,rs10494988,rs487208,rs7531398,rs76553563,rs12123237,rs145492984,rs1890007,rs78300504,rs864736,rs17023977,rs543029,rs76641944,rs495296,rs1452632,rs59084003,rs6681013,rs12403837,rs12123258,rs141164281,1:215194880_CTTTTTTTTT_C	3	6
1	215185552	rs2601645	5.81189e-13	193	27	39	38	8	81	rs12120334,rs7514200,rs76660218,rs12402694,rs6691805,rs12406318,rs12127113,rs12134208,rs2601647,rs2841614,rs6691229,rs1349671,rs748565506,rs112698436,rs199989108,rs965283,rs115948006,rs35551944,rs1597844,rs12402962,rs75718025,rs75277616,rs74533295,rs76164928,rs112145672,rs12125124,rs181023052,rs115769130,rs75259283	3	6
11	111036702	rs5794727	4.26568e-08	257	34	14	55	1	153	.	3	6
12	102336310	rs4301837	8.84149e-12	295	15	27	76	28	149	rs11111088,rs4280054,12:102325930_ATGT_A,rs11111090,rs11111091,rs7962540,rs11111094,rs11829221,rs11829258,rs4283040,rs10860822,rs11111096,rs11111097,rs10860823,12:102338295_CTGTTT_C,rs7302587	3	6
16	87229344	rs56023709	6.01097e-21	172	4	9	3	21	135	rs12934042,rs4843223,rs11641115,rs12447701,rs11864791,16:87221841_ATG_A,rs9888792,rs111864226,rs12711472,rs12711473,rs9308341,rs9308342,rs9308343,rs9308344,rs9937293,rs4843227,rs4843560,rs4843226,rs4843559,rs4843558,rs4843557,rs7205039,rs9933149,rs12921714,rs12921347,rs12920553,rs12922411,rs12921170,rs4843556,rs7196520,rs7203251,rs6540016,rs7185688,rs11644651,rs7191546,rs6540017,rs11860417,rs4843…	3	6
16	51449760	rs7196814	4.23635e-12	162	77	5	22	12	46	16:51440331_CA_C,rs35287272,rs1948948,16:51444894_AGTGGTAT_A,rs8062435,rs11641011,rs59692073,rs41318749,rs16949760,rs7197215,rs6499196,rs7200325,rs17616633,rs11859314,rs1362756,rs2063099,rs1895029,rs5816771,rs4613061,rs66983417,rs7196852,rs12445948,rs1420993,rs8055396,rs8050675,rs8053277,rs8059021,rs4784295,rs1125988,rs2160301,rs1073990	3	6
22	38181115	rs4821711	3.71913e-09	385	114	87	39	37	108	rs4396807,rs762982,rs11089854,rs12485175,rs4821706,rs3788529,rs58765732,rs35076956,rs4821708,rs775684617,rs34848977,rs13058615,rs3171656,rs15691,rs4820307,rs4820308,rs5750495,rs13057133,22:38180407_CAA_C,rs11705616,rs8135578,rs11703775,rs34465293,rs8136037,rs13055462,rs13056052,rs8136757,rs8137848,rs1894525,rs1894526,rs8142595,rs13057823,22:38191342_CT_C	3	6
4	185148189	rs1877034	4.77085e-08	169	57	13	38	44	17	.	3	6
7	151498679	rs4128399	5.54246e-22	12	0	1	0	0	11	rs4726096,rs34802637,rs4726099,rs56158745,rs4726100,rs62478243,rs13224758,rs12703159,rs56729506,rs62478244,rs62478245	3	6
7	2796763	rs798496	1.03428e-12	356	14	14	72	20	236	rs798565,rs10807805,rs4719646,rs7797295,rs3830624,rs4719647,rs4719648,rs798563,rs798562,rs798560,rs798559,rs798558,rs798557,rs798556,rs34802551,rs798555,rs798554,rs4719654,rs798552,rs798551,rs798550,rs798548,rs10480003,rs798547,7:2761349_CA_C,rs798546,rs798545,7:2762764_AAAG_A,rs798544,rs798540,rs78018097,rs798536,rs709282,rs798531,rs798528,rs798526,rs798518,rs798514,rs798513,rs798512,rs798511,rs…	3	6
7	151489711	rs11770585	1.12137e-10	1	0	1	0	0	0	.	3	6
7	15614112	rs6948002	9.29919e-09	208	32	36	67	50	23	rs9987013,rs6969348,rs6951635,rs10251642,rs10265426	3	6
8	108948041	rs796496155	1.41658e-21	424	1	1	50	129	243	rs1463760,rs10109988,rs150883195,rs2881824,rs4734161,rs13251500,rs58466548,rs7008705,rs35081304,rs937293,rs17309767,8:108883010_AC_A,rs4735016,rs4735017,rs13268280,rs4735019,rs10092788,rs12155830,rs2220860,rs13274073,rs1353299,8:108889952_CTT_C,8:108890516_AT_A,rs35318155,rs11783329,rs1874203,rs2088111,rs35417318,rs35605356,8:108902062_GTT_G,rs200938718,rs150070636,rs555008,rs664170,rs661555,rs47…	3	6
9	113653219	rs61044471	1.11253e-08	226	4	21	33	41	127	rs4556147,rs7037351,rs148957934,rs10759473,rs10817104,rs10817105,rs10817106,rs10980620,rs10817107,rs1326892,rs12236346,rs72764214,9:113658116_CAACAAAAGAG_C,rs72764216,rs10817108,rs1977415,rs10980623,rs10980624,rs4978966,rs1007000,rs7873106,rs140589730,rs72764225,rs2182578,rs1409684,rs1409682,rs10980628,rs10817109,rs10759474,rs72748146,rs72748148,rs72748150,rs55705257,rs56302512	3	6
1	47974123	rs61784835	3.02075e-12	365	3	49	137	58	118	rs6658111	4	0
15	96865270	rs3743466	8.94517e-10	52	6	8	26	3	9	.	4	0
16	87223723	rs111864226	6.19511e-09	165	15	25	29	17	79	rs9888792,rs12711472,rs12711473,rs9308341,rs9308342,rs9308344,rs9937293,rs4843227,rs4843560,rs4843226,rs4843559,rs4843558,rs4843557,rs7205039,rs9933149,rs12921714,rs12921347,rs12922411,rs4843556,rs7196520,rs7203251,rs56023709,rs6540016,rs7185688,rs11644651,rs7191546,rs6540017,rs8047567,rs12711474,rs4240788,rs8055080	4	0
3	190668204	rs13066848	9.72397e-12	172	1	1	26	7	137	rs13070564,rs61500084,rs146550622,rs113180518,rs112522420,rs4624605,rs4308324,rs4308325,rs73193907,rs56234707,rs56268441,rs58531798,rs12727448,rs34886272,rs61494018,rs187620717,rs60386222,rs62288104,3:190646282_TA_T,rs13066753,rs13078126,3:190650826_TG_T,rs61067594,rs10937450,rs34859790,rs13060370,rs13089287,3:190655448_AT_A,rs1909960,rs2363038,rs2088882,rs883842,rs883841,rs1316356,rs905124,rs343…	4	0
7	151498679	rs4128399	3.10442e-10	12	0	1	1	7	3	rs13224758	4	0
8	11263622	rs4546618	4.36291e-10	1590	221	231	322	287	529	rs36089015,rs10090939,rs6999270,rs10100187,rs4841526,rs4841527,rs34699199,rs11782823,rs11782893,rs7832963,rs7003840,rs6985489,rs6601588,rs7350091,rs10094320,rs10104336,8:11268623_CA_C,rs13275905,rs10098597,rs201874260,rs6982763,rs11250135	4	0
8	108878522	rs58466548	1.5981e-09	334	34	65	113	9	113	rs4735016,rs622634,rs557606,rs2047197,rs1098815,rs534702,rs593872,rs491126,rs668941,rs624798,rs613502,rs565835,rs796496155,rs594725,8:108949730_TA_T,rs521242,rs609820,rs504380,rs554316,rs688754,rs673812,rs673355,rs505451,rs2453419,rs2453420,rs2047198,rs2047199,rs619863,rs634897,rs514848,rs661291,rs548953,rs549780,rs664001,rs498232,rs676613,rs502610,rs503575,rs3039298,rs629702,rs656624,rs689411	4	0
11	110946372	rs11418777	5.00775e-12	275	12	13	46	62	142	rs321348,rs321350,rs73015136,rs321403,rs321404,rs7941114,rs321406,rs11213729,rs68122012,rs1878536,rs1878537,rs7924641,rs12275746,rs12276034,rs321414,rs321416,rs321418,rs321422,rs7123402,rs574760,rs167684,rs536579,rs576877,rs1900556,rs7926634,rs7940380,rs1517578,11:111022214_GGTGTGTGT_G,rs111506341,rs7939631,rs7927998,rs73021576,rs73021578,rs577049763,rs527397,rs73003515,rs73003518,rs73003519,rs15…	5	4
11	44988051	rs11038230	8.07886e-09	54	14	0	0	0	40	rs74691537,rs68064952,rs923026,rs10838395,rs12285862	5	4
11	111025039	rs34077344	2.27597e-08	35	9	10	6	4	6	.	5	4
12	106476805	rs12146713	9.21373e-18	128	23	2	1	46	56	rs12369969,rs73193824,rs1427793,rs3741884,rs17038091,rs1978730,rs73193841,rs12370774	5	4
12	21431994	rs2199687	2.03793e-10	551	96	71	126	17	241	rs71446763,rs11045916,rs11045917,rs4149009,rs11045918,rs4149006,12:21423652_ATAAT_A,rs2417971,rs4337089,rs4442593,rs12820529,rs11045930,rs2417972,rs796251027,rs11045932,rs11045933,rs60183685,rs10841784,rs66777941,rs142813630,rs12307908,rs10841786,rs10841787,rs3794320,rs11045942,rs4149002,rs6487215,rs7978322,rs10770795,rs748376997,rs2900480,rs7965059,rs11045946,rs4148998,rs2199686,rs2199684,rs7967…	5	4
13	50807123	rs2765767	8.63277e-12	213	51	41	34	12	75	rs2066630,13:50786249_TC_T,rs769656666,13:50806063_AAACAAC_A,rs2580190,rs2812196,rs1326127,rs2066660,rs2762050	5	4
13	99488998	13:99488998_CT_C	6.30388e-10	698	73	35	54	122	414	13:99507188_AAATCCCTAAATGGCTC_A,rs6491459,rs12875139,rs16955981,13:99529056_AG_A,rs6491460,rs9517474,rs2296996,rs2296997,rs2274641,rs2274642,rs1928104,rs2390141,rs16956013,rs1324982,13:99552420_TA_T,rs754883925,rs9554536,13:99558032_TAA_T,rs9284181,rs4771320,rs9557090,rs7331504,rs1887855,rs567509805,rs537750795,rs199635893,rs117566375,rs116957092,rs9513509,rs1408721,rs1408719,rs9300522,rs9513510,…	5	4
15	85686764	rs8037886	7.57559e-09	733	40	82	358	133	120	15:85672905_GT_G,rs6496733,rs8041189,rs12909477,rs2342118	5	4
16	87225139	rs4843227	6.22255e-16	169	0	1	11	17	140	16:87221841_ATG_A,rs9888792,rs111864226,rs12711472,rs12711473,rs9308341,rs9308342,rs9308343,rs9308344,rs9937293,rs4843560,rs4843226,rs4843559,rs4843558,rs4843557,rs7205039,rs9933149,rs12921714,rs12921347,rs12920553,rs12922411,rs12921170,rs4843556,rs7196520,rs7203251,rs56023709,rs6540016,rs7185688,rs11644651,rs7191546,rs6540017,rs11860417,rs4843555,rs12149643,rs4843554,rs4843553,rs4843552,rs804756…	5	4
18	60895919	rs12970504	3.02041e-11	31	0	0	0	0	31	rs7243091,rs12957119,rs71162605,rs12967026,rs113421548,rs71162607,rs12964435,rs71353381,rs6567331,rs11877925,rs7242542,18:60903629_CA_C,rs4987768,rs17070848,rs8083946,rs11152374,rs11663275,rs12970840,rs12961976	5	4
2	85874845	rs17508843	2.25487e-08	243	100	58	40	12	33	rs11891495,rs62166770,rs34623563,rs62166779,rs13009914,rs11887442,rs11887443	5	4
22	38115209	22:38115209_CAAATAAAT_C	1.85525e-10	387	22	19	105	120	121	rs11704737,rs4820296,rs1894533,rs4821688,rs4820297,rs62236745,rs4821691,rs35554660,22:38108964_AAAATAAAT_A,rs13055217,rs4820299,rs4821696,rs8135498,rs10854704,rs2413479,rs4821698,rs4821699,rs5750482,rs1006139,rs12628603,rs13054210,rs56114444,rs4820301,rs34891095,rs12484134,rs12484064,rs13058068,rs2413483,rs13054052,rs8140207,rs4820303,rs4821703,rs34134374,rs4396807,rs4239889,rs762982,rs11089854,r…	5	4
3	177331273	3:177331273_CTTT_C	3.62985e-09	291	101	19	21	3	147	rs11716881,rs6802551,rs6766914,rs1532604,rs10936949,rs12696446,rs9871317,rs4857717,rs6804861,rs937506,rs2014126,rs200461409,rs11714247,rs2201991,rs1123129,rs1566409,rs1566408,rs35592194,rs12497597,rs9829760,rs71304074,rs13083260,rs13060978,rs16828300,rs12630655,rs766219987,rs10936950,rs2242401,rs4857718,rs4857615,rs4857719,rs12496456,rs13091612,rs9875373,rs1875101,rs1875100,rs4989456,rs34398785	5	4
7	2783815	rs798508	3.51224e-17	362	6	16	21	20	299	rs10257934,rs798565,rs798563,rs798562,rs1184662,rs798561,rs798560,rs798559,rs798558,rs798557,rs798556,rs34802551,rs798555,rs798554,rs798552,rs798551,rs798550,rs798548,rs798547,7:2761349_CA_C,rs798546,rs798545,7:2762764_AAAG_A,rs798544,rs798540,rs78018097,rs798536,rs709282,rs798531,rs798528,rs798526,rs798518,rs798514,rs798513,rs798512,rs798511,rs798510,rs798506,rs798503,rs798502,rs798500,rs5297943…	5	4
7	134425030	rs12535534	2.94845e-09	219	35	2	2	0	180	rs12540110,rs35154415,rs6962339,rs12668482,rs62462501,rs10258722,rs59224359,rs62462507,rs12538573,rs6957974,rs62462517,rs6467556,rs80055444,rs2347896,rs1377296	5	4
8	108396678	8:108396678_CA_C	1.87032e-11	324	133	12	20	68	91	rs1654723,rs1654724,rs1654725,rs1632354,rs1631690,rs1631592,rs1654726,rs1672157,rs1654727,rs1654728,rs5893855,rs1433179,rs1433180,rs1433181,rs1654730,rs1672148,rs1433183,rs1283707,rs1315400,8:108400015_GT_G,rs145837699,8:108400660_AAAAT_A,rs1283706,rs1283705,rs1283669,rs1283665,rs1283691,rs1283690,rs1283689,rs1283688,rs919823,rs1283686,rs919822,rs5893860	5	4
9	113747630	rs10980679	2.11808e-09	174	0	7	13	43	111	rs4556147,rs7037351,rs61044471,rs10759473,rs10817106,rs10817107,rs140589730,rs10980628,rs10817109,rs72748150,rs56302512,rs548894189,rs142994562,rs12552125,rs734250,rs10980694	5	4
9	114057475	rs72607186	1.58303e-08	100	7	23	15	32	23	rs10491879,rs4978988	5	4
1	215139887	rs1452628	1.06228e-34	177	25	15	3	2	132	rs1077323,rs755576,rs1452626,rs1452627,rs6667184,rs12757359,rs1901620,rs1901621,rs10494987,rs17023910,rs12728280,rs6540873,rs2167688,rs562410,rs476557,rs1349673,rs507072,rs1452630,rs10494988,rs4517324,rs487208,rs1582113,rs7531398,rs76553563,rs12123237,rs145492984,rs1890007,rs78300504,rs11120457,rs864736,rs2077982,rs17023977,rs543029,rs76641944,rs1452631,rs495296,rs1452632,rs59084003,rs6681013,rs1…	6	9
1	215185552	rs2601645	6.39805e-20	193	8	15	70	6	94	rs12120334,rs7514200,rs76660218,rs12402694,rs6691805,rs12406318,rs544535,rs12127113,rs12119060,rs12134208,rs2601647,rs1901622,rs2841614,rs6691229,rs1597846,rs1349671,rs748565506,rs112698436,rs199989108,rs1452611,rs965283,rs753718556,rs115948006,rs35551944,rs1597844,rs34437031,rs2841593,rs2841590,rs2841589,rs1156732,1:215206547_CTT_C,rs200361141,rs2841586,rs2841585,rs2841584,rs1452613,rs2841582,rs…	6	9
1	47980916	rs6658111	1.04205e-14	305	0	4	47	57	197	rs61784835	6	9
1	150835053	1:150835053_TA_T	8.74901e-10	661	74	75	39	182	291	rs12568757,rs769400009,rs1136774,rs7534124,rs11204725,rs34002273,rs12125650,rs12725667,rs12725806,rs4970976,rs3894771,rs2089081,rs2039590,rs11204735,rs12758227,rs11204737,rs12410050,rs12404199,rs7412746,rs12402006,rs745693664,rs486836,rs1081512,rs12126004,rs35486314,rs4970932,rs267735,rs3754211,rs6587551,rs11204752,rs2305814	6	9
1	215159119	rs12079236	2.63569e-09	78	23	23	7	5	20	rs12073570,rs12078174,rs72760669,rs115206394	6	9
12	106476805	rs12146713	2.73852e-14	128	76	7	3	15	27	rs12369969,rs73193824,rs1427793,rs1064959,rs3741884,rs17038091,rs1978730,rs73193841,rs1896364,rs7485023,rs10778458,rs11112866,rs73193855,rs112312971,rs55657928,rs3782692,rs12370774	6	9
12	20783761	rs10841577	3.18752e-08	135	78	21	12	5	19	.	6	9
15	85529772	rs67613323	1.42357e-20	479	3	8	16	48	404	rs778400737,rs12439802,rs62022525,rs12900078,rs116893322,rs771417755,rs34585903,rs796672389,rs11629962,rs11629963,rs71397835,rs62022527,rs62022528,rs7359256,rs200324841,rs4980341,rs11439217,rs66550763,rs62021182,rs4980340,rs62021184,rs11629967,rs2122858,rs12903975,rs3862411,rs35000527,rs35816571,rs36184157,rs12900736,rs12904958,rs34493704,rs289418,rs71397837,rs62021203,rs34731527,15:85567457_TATC…	6	9
18	42437314	rs614797	4.1583e-10	137	1	7	28	25	76	rs11392808,rs34038580,rs28600969,rs12965289,rs35857171,rs687971,rs665997,rs644286,rs622759,rs626498,rs661638,rs661251,rs659583,rs678726,rs1276249,rs1291324,rs654269,rs881433,rs881434,rs1036929,rs11082412,rs34535142,rs8088989,rs2361050,rs9807721	6	9
22	21251814	rs361831	2.47408e-10	639	27	139	89	9	375	rs552668,rs499113,rs598141,rs479275,rs542771,rs853148,rs591446,rs637335,rs9612645,rs515841,rs8136537,rs165817,rs140466,rs4052260,rs5760087,rs853295,rs4820573,rs5751786,rs6004026,rs1807692,rs5760196,rs5760197,rs13054456,rs4361213,rs9608348,rs5751802,rs11462205,rs5760217,rs3852979,rs2002524,rs2002525,rs6004106,rs2010990,rs1558656,22:21094745_TA_T,rs5760287,rs6004122,rs201073843,rs2241138,rs738058,r…	6	9
3	194470632	rs10933668	5.15507e-10	180	20	22	50	28	60	rs6437412,rs6777925,rs7627816,rs4677637,rs4393849,rs4234201,rs4361226,rs10933671,rs4677742,rs4677743,rs4677744,rs6437417	6	9
5	122743729	rs6595444	9.90567e-10	617	233	76	44	24	240	rs12520233,rs1047440,rs7725869,rs6595438,rs6891155,rs2115172,rs2115173,rs748649855,rs7735212,rs11241689,rs762042055,rs34984032,rs397743989,rs34732995,rs2407778,rs1428389,rs17408002,rs17150385,rs6887350,5:122713839_TA_T,rs9942363,rs142849434,rs11950066,rs6595440,rs13153729,rs761221355,rs13176035,rs13159477,rs13181772,rs61604748,rs13154717,rs4348209,rs148253525,rs17150407,rs13174550,rs6876883,rs749…	6	9
5	122548721	rs7702622	3.5601e-08	157	42	24	31	10	50	.	6	9
5	148646282	rs1370975	4.6592e-08	175	5	47	37	5	81	.	6	9
6	34962060	rs3823438	6.58382e-14	290	14	3	73	42	158	rs847852,6:34922921_CT_C,rs2820234,rs2820233,rs2820232,rs12525532,rs3800426,rs2820223,rs2820224,rs1568705,rs2820230,rs13191889,rs820096,rs820076,rs820075,rs820074,rs865353	6	9
6	149406050	6:149406050_TGAG_T	4.55638e-10	414	47	70	34	29	234	rs12204964,rs9404011,rs12194615,rs1564602,rs4358650,rs6930963,rs17669546,rs34599887,rs9498197,rs4441968,rs6570923,rs6570924,rs12200909,rs2153252,rs11429928,rs3949414,rs6914281,rs12153925,rs34118116,rs6932773,rs6914925,rs6570926,rs6570927,rs12202158,rs4332004,rs10457839,rs1934221,rs1934222,rs1934223,rs13217006,rs35084439,rs11387657,rs6930713,rs9498199,rs9322165,rs9485351,rs4313020,rs775941057,rs94…	6	9
6	7881754	rs41302895	1.53003e-09	96	8	3	3	4	78	rs267180,rs1358892,rs2241669,rs72829207,rs72829210,rs267207,rs387786,rs1225923,rs1228633,rs1225942,rs89715,rs1225945,rs1225946,rs1225947,rs1225948	6	9
6	169500186	rs62435803	4.56178e-09	153	31	14	14	24	70	rs62435771,rs62435772,rs62435789,rs10485332,rs62435790,rs62435791,rs62435792,rs73034034,rs62435793,rs17788472,6:169485188_CAGAA_C,rs73034063,rs62435795,rs62435796,rs17184572,rs62435798,rs62435799,rs62435800,rs62435801,rs62435802,rs62435804,rs62435806,rs62434680,rs17184923,rs980777,rs62434682,rs62434683,rs62434684,rs62434685,rs62434686,rs73036152,rs62433594,rs62433595,rs62433597,rs142007912,rs7303…	6	9
6	169562308	rs4708599	2.41842e-08	250	117	35	24	15	59	.	6	9
7	151498679	rs4128399	3.32608e-25	12	0	0	0	0	12	rs34802637,rs4726099,rs56158745,rs4726100,rs62478243,rs13224758,rs12703159	6	9
7	115836320	7:115836320_CT_C	1.50982e-09	622	182	50	158	162	70	rs2896175,rs10953811,rs12536669,rs6977233,rs6959449,rs6977380,rs6977757,rs6949241,rs28710948,rs4082046,rs10245914,rs747202719,rs4436065,rs4535671,7:115823119_GT_G,rs6968419,rs10953813,rs36030507,rs10261818,rs10261823,rs6947586,rs11764793,rs6979486,rs6967663,rs2402053,rs10235059,rs940471	6	9
8	120584160	rs745383	2.28617e-08	258	23	27	53	81	74	rs2305126,rs976423,rs7832704	6	9
8	121215991	rs2305600	3.58384e-08	260	130	9	12	32	77	.	6	9
9	15567200	rs7044122	2.51485e-09	999	22	28	61	132	756	rs2039980,rs77169126,rs762357168,rs34323129,rs7020760,rs9650677,rs10756670,rs10962064,rs10962065,9:15545865_CTTTTTTT_C,rs10756671,rs10756672,rs10962066,rs10810398,rs10738401,rs7860623,rs3955162,rs35428378,rs10810399,rs10962070,rs10810400,9:15568435_AT_A,rs7874533,rs4740615,rs375875355,rs1039813,rs1039814,rs10756674,rs10810401,rs4448380,rs756055601,rs4741512,rs4740617,rs146762198,rs10810405,rs9696…	6	9
1	215139887	rs1452628	4.21387e-27	177	34	4	7	84	48	rs755576,rs6540873,rs562410,rs476557,rs507072,rs10494988,rs487208,rs7531398,rs76553563,rs12123237,rs145492984,rs1890007,rs78300504,rs11120457,rs864736,rs17023977,rs543029,rs76641944,rs495296,rs1452632,rs59084003,rs6681013,rs12403837,rs12062933,rs12123258,rs58723789	7	7
1	215185552	rs2601645	1.31873e-21	193	9	14	17	48	105	rs12120334,rs7514200,rs76660218,rs12402694,rs6691805,rs12406318,rs544535,rs12127113,rs12119060,rs12134208,rs2601647,rs1901622,rs2841614,rs6691229,rs1597846,rs1349671,rs748565506,rs112698436,rs199989108,rs1452611,rs965283,rs753718556,rs115948006,rs35551944,rs1597844,rs34437031,rs2841593,rs2841590,rs2841589,rs1156732,1:215206547_CTT_C,rs200361141,rs2841586,rs2841585,rs2841584,rs1452613,rs2841582,rs…	7	7
1	155433942	rs12724079	3.76786e-11	508	41	13	23	15	416	rs12743084,rs12411216,rs2974935,rs2075570,rs28445596,rs2990220,rs497829,1:155194140_CAT_C,rs2049805,rs2974931,rs2974930,rs2974929,rs2990245,rs4971072,rs6692183,rs6677385,rs11264362,rs11264363,rs12131079,rs11264365,rs66923802,rs11264366,rs11264367,rs5005770,1:155345589_CA_C,rs71517782,rs6665823,rs2025669,rs12081067,rs7416976,rs11264369,1:155360003_TATAA_T,rs6670014,rs56675301,rs7556102,rs12025532,…	7	7
1	155386445	rs111360475	7.11416e-11	87	0	0	3	28	56	rs150352963,rs140676308,rs35154152,rs67579710,rs72704117,rs11580040,1:155198264_CG_C,rs72704130,rs56894225,rs180921974,rs41314549,rs148015261,rs143612128,rs72704164,rs72704165,rs111652370,rs113671475,rs72704175,rs553470220,rs149253716,rs72704191,rs72704192,rs139932136,rs138522636,rs34172230,rs567387639,rs143582530,rs72706118,rs72706130,rs116237120,rs140893634,rs72706176,rs72706180	7	7
1	215160902	rs72760669	4.23619e-09	79	16	1	2	31	29	rs17603259,rs11579679,rs17544023,rs17544265,rs17544426,rs12073570,rs12078174,rs12079236,rs56662669	7	7
1	12524652	rs12731666	6.1338e-09	38	13	10	7	0	8	rs3765339,rs4845898,rs35223089,rs12125606	7	7
1	215154967	1:215154967_GA_G	2.89779e-08	77	1	0	25	25	26	rs61818244,rs61818245,rs55804545,rs61818248,rs61818249	7	7
11	111072779	rs949279	4.20389e-11	129	15	5	45	9	55	rs321348,rs7924641,rs59614433,rs12794347,rs58066679,11:111056921_AATGTGGTAGCTTCC_A,rs61900578,rs35051367,rs7936534,rs11827673	7	7
11	111006783	rs149179606	3.35057e-09	10	1	0	3	3	3	.	7	7
12	106476805	rs12146713	1.31691e-22	128	0	1	0	0	127	rs12369969,rs73193824,rs1427793,rs1064959,rs3741884,rs17038091,rs1978730,rs73193841,rs1896364,rs7485023,rs10778458,rs11112866,rs73193855,rs112312971,rs55657928,rs3782692,rs12370774	7	7
12	20783761	rs10841577	2.5933e-11	135	62	13	24	17	19	.	7	7
12	28605426	rs10771427	3.75203e-11	1013	612	4	12	21	364	rs1351266,rs7971974,rs35247497,rs7305790,rs12229872,rs11049364,rs11049365,rs11049368,rs16932640,rs7977538,rs1965280,rs1463571,rs2881787,rs4931727,rs4931729,rs4931730,rs11049373,rs2127315,rs35787832,rs11049380,rs2035271,rs60025108,rs7487773,rs34043014,rs10492370,rs981494,rs1118097,rs7316299,rs7139154,rs11049411,rs10459090,rs10459091,rs1841964,rs35098487,12:28352241_TACTA_T,rs201349622,rs12049916,r…	7	7
14	54413610	rs2358432	1.48211e-09	57	1	0	0	5	51	rs66913363,rs12893484,rs17563,rs2761882,rs2855530	7	7
15	85693016	rs2342118	4.91592e-23	738	6	5	25	184	518	rs778400737,rs896364,rs12439802,rs7173332,rs62022525,rs12900078,rs116893322,rs771417755,rs34585903,rs796672389,rs67613323,rs11629962,rs11629963,rs71397835,rs62022527,rs62022528,rs7359256,rs4980341,rs11439217,rs66550763,rs62021182,rs4980340,rs62021184,rs11629967,rs12903975,rs3862411,rs35000527,rs35816571,rs36184157,rs12900736,rs12904958,rs34493704,rs71397837,rs62021203,rs34731527,15:85567457_TATC_…	7	7
15	58347949	rs1994927	4.78947e-12	349	1	29	22	16	281	rs1816777,rs8042779,rs8042677,rs4775006,rs12909979,rs10851631,rs10851632,rs1441819,rs4646645,rs9325,rs1061278,rs1063666,rs3204690,rs4646642,rs4646640,rs2197092,rs3742961,rs3742960,rs12910113,rs4646638,rs3742959,rs11855259,rs3784264,rs7165247,rs4646635,rs7170896,rs3784262,rs2119859,rs4646629,rs4646627,rs1812889,rs4646626,rs4646625,rs2414527,rs4646623,rs4646622,rs3784259,rs4646619,rs7164408,15:5825…	7	7
15	85870151	rs117833520	2.792e-09	18	1	2	1	9	5	rs117999094	7	7
16	87226843	rs12921347	9.59678e-10	164	5	16	26	22	95	16:87221841_ATG_A,rs9888792,rs111864226,rs12711472,rs12711473,rs9308341,rs9308342,rs9308343,rs9308344,rs9937293,rs4843227,rs4843560,rs4843226,rs4843559,rs4843558,rs4843557,rs7205039,rs9933149,rs12921714,rs12920553,rs12922411,rs12921170,rs4843556,rs7196520,rs7203251,rs56023709,rs6540016,rs7185688,rs11644651,rs7191546,rs6540017,rs4843555,rs12149643,rs4843554,rs4843553,rs4843552,rs8047567,rs12711474…	7	7
16	51442679	rs1948948	3.06638e-08	162	35	25	36	39	27	.	7	7
18	42424312	rs35857171	9.25223e-19	134	0	0	16	12	106	rs6507587,rs11392808,rs34038580,rs28600969,rs12965289,rs687971,rs665997,rs644286,rs622759,rs626498,rs661638,rs661251,rs614797,rs659583,rs678726,rs1276249,rs1291324,rs654269,rs881433,rs881434,rs1036929,rs11082412,rs676930,rs34535142,rs8088989,rs633215,rs630999,rs617459,rs683461,rs639964,rs663651,rs3085861,rs11422925,rs618472,rs652539,rs684656,rs2361050,rs596159,rs595106,rs638807,rs685553,rs9807721…	7	7
18	53276523	rs9951280	1.3309e-09	266	75	54	38	10	89	rs682245,rs12458118,rs616580,rs1642313,rs8090341,rs644279,rs12457157,rs12103984,rs6566169,rs35691742,18:53308061_AT_A,rs17089911,rs12457071,18:53362049_CCTCT_C,rs2901982,rs12456600,rs34704381,rs149804814,rs11662998,rs12963600,rs899104	7	7
2	56116193	2:56116193_TTGATTCTTGGCCTCCCTCCC_T	2.14675e-18	314	57	7	25	14	211	rs115322503,rs115444064,rs76387685,rs6761663,2:56127099_AT_A,rs7596872,rs78857879,rs4233964,rs3762515,rs113481311,rs146896516,rs144603191,rs11400437,rs80028351,rs11686318,rs11693755,2:56249580_AT_A	7	7
2	218745477	rs2288164	4.49379e-09	55	7	22	9	11	6	.	7	7
2	56110552	rs3791676	8.1398e-09	316	125	35	62	25	69	rs7560508,rs6742316,rs1430191	7	7
2	111616304	rs1533298	1.71651e-08	284	40	12	11	43	178	rs7588925,rs10179923,rs10180020,rs12711785,rs4849134,rs4849135,rs1533300	7	7
20	10739837	rs765811681	1.80147e-09	49	28	1	0	1	19	rs2038611,rs6134023,rs41280286,rs77272398,rs6108695,rs6134025,rs751396908,rs75612301,rs6134028	7	7
20	38654372	rs4812424	1.75756e-08	122	4	27	42	9	40	rs10211813,rs6124205	7	7
22	21247048	rs178083	7.47088e-11	638	153	12	24	72	377	rs4822429,rs9608279,rs552668,rs499113,rs598141,rs479275,rs542771,rs853148,rs591446,rs637335,rs9612645,rs515841,rs165817,rs140466,rs4052260,rs1042668,rs4315628,rs28538662,rs9608307,rs180814,rs3930342,rs4557089,rs5760087,rs9610150,rs853295,rs2845475,rs4820573,rs4820575,rs5751786,rs6004026,rs1135929,rs738053,rs2329478,rs1807692,rs2080335,rs5751800,rs4820579,rs4822471,rs5760196,rs5760197,rs13054456,r…	7	7
22	38138284	rs34134374	1.96251e-08	387	3	2	20	30	332	rs4820303,rs4821703,rs4239889,rs3788529,rs35076956,rs4821708,rs775684617,rs34848977,rs13058615,rs3171656,rs15691,rs5756812,rs4820307,rs4820308	7	7
22	18285299	rs378459	2.62866e-08	67	0	0	8	7	52	rs389496,22:18289529_GT_G,rs454799,rs423710,rs387641,rs365746,rs425011,rs1296703	7	7
3	194474928	rs4677637	2.14655e-09	180	38	19	14	13	96	rs6437412,rs10933668,rs6777925,rs7627816,rs4393849,rs4234201,rs4361226,rs10933671,rs4677742,rs4677743,rs4677744,rs6437417,rs10460776	7	7
3	183395135	rs16857992	1.08637e-08	342	8	14	12	17	291	.	7	7
3	73714843	rs1039956	2.641e-08	428	176	81	28	48	95	rs11128357,3:73709791_AAT_A,rs1355467,rs13078725	7	7
5	2387281	rs2019736	1.33855e-08	76	22	0	8	3	43	rs931284,rs931283	7	7
6	35009578	rs2820224	3.43638e-08	390	56	140	48	89	57	rs3800426,rs1568705,rs2820230,rs13191889	7	7
7	115832438	rs6979486	2.69784e-11	623	161	77	178	54	153	rs1524469,rs1554631,rs10953803,rs6965778,rs3029628,rs10267746,rs4730710,rs9691405,rs10263933,rs7808705,rs6964941,rs6950848,rs10275388,rs11770268,rs10224339,rs950637,rs10232544,rs10236140,rs7777437,rs10235136,rs139443746,rs6978849,rs2896175,rs10953811,rs12536669,rs6977233,rs6959449,rs6977380,rs6977757,rs6949241,rs28710948,rs4082046,rs10245914,rs747202719,rs4436065,rs4535671,7:115823119_GT_G,rs6968…	7	7
7	2884433	rs1636250	1.21049e-08	340	37	12	79	70	142	rs574392601,rs1636247,rs2533877,rs2527677,rs1639040,rs1636249,rs1639036,rs1636253,rs2533870,rs1636254,rs12700373,rs2533868,rs2533867,rs2644281,rs11973498,rs71522302,rs71524003	7	7
1	47980916	rs6658111	1.41795e-13	305	1	24	62	54	164	rs61784835	8	8
11	111037249	rs516110	4.2493e-09	257	7	42	11	66	131	rs484021,rs7112075,rs559757,rs560503,rs514347,rs565152,rs539009,rs516177,rs17459717,rs494921,rs580656,rs536679,rs502584,rs511835,rs534858,rs536579,rs576877,rs1900556,rs7926634,rs7940380,rs1517578,11:111022214_GGTGTGTGT_G,rs111506341,rs7939631,rs7927998,rs73021576,rs73021578,rs577049763,rs527397,rs73003515,rs73003518,rs73003519,rs1517581,rs547367,rs5794727,rs17460676,rs555063,rs12421339,rs522188,r…	8	8
13	51340315	rs592333	9.3005e-13	98	0	1	12	58	27	.	8	8
15	85693016	rs2342118	3.19957e-09	738	230	63	154	136	155	rs17611171,rs12908400,rs12912860,rs12902942,rs12900012,rs12909130,rs141678143,rs28887294,rs11632899,rs72757059,rs12909111,rs11632658,rs11630697,rs11634975,rs4980357,rs4980356,rs11634877,rs34743976,rs62019482,rs11631548,rs1532776,rs35845738,rs17540307,rs12905036,rs12913859,rs12914463,rs12904238,rs3816105,rs2304418,rs4843019,rs4842864,rs11637512,rs17541051,rs35668291,15:85672905_GT_G,rs6496733,rs80…	8	8
16	87233185	rs4843553	4.31312e-28	173	0	10	9	13	141	rs12934042,rs4843223,rs11641115,rs66506946,rs11865818,16:87216713_ATGCAGTATATGGC_A,rs9922143,rs56399712,rs9783773,rs11863620,rs9783786,rs62042578,rs11864957,rs12447701,rs11864791,rs11861940,rs11861033,16:87221841_ATG_A,rs9888792,rs111864226,rs12711472,rs12711473,rs9308341,rs9308342,rs9308343,rs9308344,rs9937293,rs4843227,rs4843560,rs4843226,rs4843559,rs4843558,rs4843557,rs7205039,rs9933149,rs1292…	8	8
16	87177837	rs4843536	4.04453e-09	5	0	1	1	1	2	.	8	8
16	87357985	rs72804073	9.44512e-09	153	5	3	75	39	31	rs9940109	8	8
16	87283439	rs62056198	1.21887e-08	58	18	2	3	6	29	rs1966575,rs4843583	8	8
17	7485583	rs62059826	7.20437e-09	331	49	10	67	131	74	rs6608,rs11654859,rs4542712,rs9901673,rs10852891	8	8
20	38542569	rs17803745	4.72096e-08	199	90	2	7	21	79	.	8	8
3	194470632	rs10933668	4.36558e-12	180	23	26	46	16	69	rs6437412,rs6777925,rs4677637,rs4393849,rs4234201,rs4361226,rs10933671,rs4677743,rs6798915,rs4677744,rs6437417,rs10460776	8	8
7	120897565	rs538720133	8.2748e-14	375	18	7	15	22	313	rs798943,rs566523025,rs2968338,rs1296405,rs13245677,rs798946,rs12673770,rs12706313,rs34320754,rs549829667,rs34249834,rs7801723,rs12706318,rs10953928,rs13232048,rs35758028,rs6947453,rs6952113,rs6951990,rs34770628,rs872007,rs872008,rs868053,rs884373,rs10234955,rs10235232,rs10275439,rs10261671,rs10280039,rs13245690,rs35348547,rs10258619,rs1917110,rs1404264,rs776700095,rs6950680,rs66871562,rs35789132…	8	8
7	102610797	rs12671803	2.92524e-08	594	79	153	114	55	193	.	8	8
9	13939884	rs17277467	2.92902e-12	217	5	4	3	11	194	rs12347936,rs10810052,rs7038661,rs10961289,rs34170111,rs6474794,rs34328168,rs139808453,rs13291433,rs9969743,rs71507395,rs35586069,rs35960404,rs35468074,rs10119201,rs35246532,rs35249758,rs34764349,rs17192194,rs35684545,9:13937353_TA_T,rs13286204,9:13938966_GA_G,rs13292270,rs13292571,rs13299074,rs13298062,rs13299961,rs13283645,rs17277593,rs71511071,rs71321952,rs71511072,rs17192702,rs36092776,rs6684…	8	8
1	47980916	rs6658111	3.52722e-10	305	50	58	117	11	69	rs61784835	9	8
10	115281857	rs2419831	1.52667e-08	156	37	10	28	51	30	rs7090310	9	8
12	28550776	rs7967281	1.19374e-08	978	69	68	147	62	632	12:28351859_CT_C,rs7305378,12:28432808_CTG_C,12:28432844_GT_G,rs11049503,rs61922974,12:28436470_AT_A,rs61922975,rs61922976,rs61922977,rs11049507,rs11049509,rs11049510,rs12372448,rs200125551,rs11049515,rs11049516,rs74567249,rs61922979,rs11049517,rs11049518,rs12368409,rs10843150,rs3825246,rs3782517,rs3782515,rs11049520,rs11049521,rs11049524,rs11049525,rs12371974,rs11049526,rs146532939,rs9645730,rs1…	9	8
12	85576492	rs11609649	1.75181e-08	290	65	34	10	30	151	.	9	8
2	54393122	rs1215156	3.35591e-08	562	87	234	227	4	10	rs779709268	9	8
4	7858189	rs62289317	1.37558e-08	375	76	41	18	89	151	.	9	8
5	171128464	rs6555969	1.19806e-10	98	22	0	5	1	70	rs33830,rs33831,rs451149,rs3101875,rs755246892,rs33862,rs33863	9	8
7	102610797	rs12671803	2.02223e-12	594	33	90	140	135	196	rs9641299,rs77490360,rs10464611,rs11974748,rs4489255,rs4361704,rs149805825,rs12672488,rs9691949,rs199970642,rs9718444,rs56356294,rs7800387,7:102433003_AG_A,rs74708264,rs142264290,rs2908412,rs3933460,rs6975388,rs140795860,rs80313245,rs12671557,rs75387186,rs57253646,rs7780981,rs6946773,rs12538955,rs11981980,rs75197737,rs58919995,rs73406250,rs10487283,rs12669668,rs17136090,rs12668434,rs59544295,rs58…	9	8
1	215139887	rs1452628	9.88002e-23	177	28	67	31	8	43	rs755576,rs6667184,rs12757359,rs10494987,rs6540873,rs2167688,rs562410,rs507072,rs1452630,rs10494988,rs4517324,rs1582113,rs7531398,rs76553563,rs12123237,rs145492984,rs78300504,rs11120457,rs17023977,rs76641944,rs1452631,rs59084003,rs12403837,rs12062933,rs12123258	10	7
1	47980916	rs6658111	3.28163e-19	305	0	9	22	16	258	rs3125628,rs12743877,rs9436838,rs12141060,rs6689687,rs6703956,rs6692734,rs11211510,rs11211511,rs4147192,rs56335169,rs35711761,rs6588348,rs7525650,rs71645861,rs12138072,rs12732050,rs17452995,rs34400183,rs12126139,rs12118514,rs11211517,rs7543016,rs4926824,rs6681868,rs34952704,1:47805707_TCCCTCCCCTC_T,rs3125639,rs6659946,rs3125640,rs12121831,rs12562561,rs55737131,1:47813750_TA_T,rs2820994,rs11313993…	10	7
1	155175089	rs72704117	4.62239e-17	92	0	0	1	1	90	rs72702209,rs72702251,rs150352963,rs140178960,rs72702268,rs112559323,rs6427137,rs72702269,rs112918389,rs112519377,rs1462854,rs67333363,rs112260947,rs11449003,rs72702273,rs57157364,rs58925616,rs12126992,rs72702285,rs72702288,rs113932675,rs7517158,rs7517162,rs7548383,rs72702293,rs112591935,rs111993576,rs11264324,rs111992949,rs28670060,rs11264325,rs10908457,1:155091121_AAG_A,rs111289681,rs11264326,r…	10	7
1	155800679	rs72706174	3.42975e-14	32	0	0	7	7	18	rs72706130,rs116237120,rs72706148,rs140893634,rs72706176,rs72706180,rs72706192,rs190301488,rs140953793,rs72708217,rs72708236,rs72708247,rs149824041,rs116480793,rs76381440	10	7
1	12546694	rs12125606	1.08702e-13	38	10	15	0	3	10	rs3765339,rs4845898,rs35223089,rs12755560,rs71647039,rs12731666	10	7
1	215190256	rs112698436	6.93938e-11	170	42	30	61	6	31	rs12120334,rs7514200,rs76660218,rs12402694,rs6691805,rs12406318,rs12127113,rs12134208,rs2601647,rs2601645,rs2841614,rs6691229,rs1349671,rs748565506,rs965283,rs115948006,rs35551944,rs1597844,rs12402962,rs75718025	10	7
1	215159119	rs12079236	2.49743e-09	78	11	9	32	6	20	rs12073570,rs12078174,rs72760669	10	7
1	165868169	rs3790659	2.89423e-09	126	11	21	33	23	38	rs372981833,rs3762365,rs7543127,rs3806333,rs10800165,rs7519919,rs536109	10	7
1	184702008	rs41264582	2.90974e-08	88	29	48	5	0	6	.	10	7
10	25061887	rs4748981	1.53785e-09	244	79	24	19	7	115	rs6482440,rs4570483,rs952917,rs951857,rs951859,rs10764494,rs7911992,rs6482443,rs4747498,rs4747499,rs4747500,rs7072181,rs4748982,rs4747501,rs10741064,rs10741065,rs10764496,rs11014230,rs10828700	10	7
11	27339988	rs12796157	2.06303e-08	383	35	111	68	14	155	rs10734391	10	7
14	54422399	rs2738265	4.2599e-12	56	0	0	1	7	48	rs66913363,rs2358432,rs2855532,rs2761882,rs71446481,rs2761884,rs2855530,rs762643,rs762642,rs2761887,rs2032423,rs4898820,rs1957860,rs8014071,rs8014363	10	7
15	85693016	rs2342118	1.41515e-09	738	295	92	230	39	82	rs8037886,rs12909477,rs5814186	10	7
15	81497088	rs150752466	2.46799e-08	250	63	69	46	7	65	rs17337055,rs17337098,rs66933405,rs67601221,rs11631430,rs66709425,rs57173059,15:81497273_TA_T,rs113890265,rs11639206,rs11634864,rs113643882,rs114721012,rs115781366,rs115480823,rs35289965,rs111377212,rs59415196,rs66540250,rs72744137	10	7
16	87248134	rs4843569	5.32053e-14	183	12	31	34	7	99	16:87221841_ATG_A,rs9888792,rs111864226,rs12711472,rs12711473,rs9308341,rs9308342,rs9308343,rs9308344,rs9937293,rs4843227,rs4843560,rs4843226,rs4843559,rs4843558,rs4843557,rs7205039,rs9933149,rs12921714,rs12921347,rs12920553,rs12922411,rs12921170,rs4843556,rs7196520,rs7203251,rs56023709,rs6540016,rs7185688,rs11644651,rs7191546,rs6540017,rs11860417,rs4843555,rs12149643,rs4843554,rs4843553,rs484355…	10	7
17	34866546	rs2306593	1.35102e-08	162	12	32	16	1	101	rs2306589,rs7222903	10	7
18	42444241	rs654269	6.6817e-19	134	0	1	4	16	113	rs7243770,rs10853524,rs11082404,rs11082405,rs4146305,rs4146306,rs7227026,rs2360638,18:42350786_TG_T,rs11082407,rs11872638,rs7235139,rs11665106,rs146935067,rs6507587,rs11392808,rs34038580,rs28600969,rs12965289,rs35857171,rs1126225,rs687971,rs665997,rs644286,rs622759,18:42430344_CT_C,rs626498,rs4890489,rs12454763,rs661638,rs661251,rs10853525,rs4890490,rs614797,rs991014,rs659583,rs678726,rs1276249,r…	10	7
18	43092380	rs1421203	2.27812e-09	269	24	33	37	72	103	rs1421204,rs55719030,rs2362843,rs2193637,rs7245140,rs2193635,rs7236548	10	7
18	60904517	rs4987768	2.29108e-08	54	23	0	0	0	31	rs113421548	10	7
2	111616304	rs1533298	2.7705e-09	284	26	17	14	3	224	rs7588925,rs10179923,rs10180020,rs12711785,rs4849134,rs4849135,rs1533300,rs952249	10	7
2	56135497	rs4233964	4.76359e-09	246	28	105	55	43	15	rs6761663,2:56127099_AT_A,rs7596872,rs78857879	10	7
2	11529510	rs11683268	5.40378e-09	20	4	0	1	3	12	.	10	7
2	43682068	2:43682068_GT_G	5.5582e-09	642	18	75	60	66	423	rs6709988,rs10495899,rs11693190,rs17039131,rs75934770,rs74365854,rs116451849,rs78108161,rs75126888,rs7609283,rs7575024,rs28700209,rs7567685,rs7581586,rs7567535,rs7586101,rs17030800,2:43671098_CCA_C,rs13414140,rs7609256,rs7556744,rs10200815,rs7559842,rs77620935,rs7587268,rs78191305,rs111812200,rs12105786,rs12104615,rs12105399,rs6746610,rs6731998,rs77527404,rs7599781,rs12105626,rs12105710,rs1703081…	10	7
22	21233270	rs178074	2.61208e-11	639	11	145	31	13	439	rs4822429,rs598141,rs565979,rs479275,rs511527,rs542771,rs672235,rs491228,rs853148,rs591446,rs637335,rs639715,rs9612645,rs515841,rs517789,rs853152,rs8136537,rs165817,rs140466,rs4052260,rs4315628,rs28538662,rs9608307,rs180814,rs5760087,rs853295,rs4820573,rs5751786,rs6004026,rs1807692,rs4820579,rs5760196,rs5760197,rs13054456,rs4361213,rs9608348,rs5751802,rs11462205,rs5760217,rs3852979,rs2002524,rs20…	10	7
3	190665048	rs147618098	8.70538e-14	172	1	0	0	16	155	rs35679428,rs13323015,rs9862175,rs6444469,rs56068001,rs9838279,rs9849583,rs1393060,rs771140446,rs749413636,rs6804748,rs2202100,rs13075101,rs6799249,rs13083648,rs28873531,rs34113929,rs6802105,rs1501600,rs866986,rs13070564,rs61500084,rs146550622,rs113180518,rs112522420,rs4624605,rs4308324,rs4308325,rs73193907,rs56234707,rs56268441,rs58531798,rs12727448,rs34886272,rs61494018,rs187620717,rs60386222,r…	10	7
3	147050225	rs17567518	2.08505e-13	190	5	25	39	72	49	rs10935665,rs6794941,rs75563552,rs60465570,rs58177617,rs1500865,rs1500866,rs62275309,rs780200765,rs1500867,rs60852193,rs113270900,rs62275311,rs7639019,rs61115449,rs62275342,rs62275343,rs66507831,rs4411854,rs1909876,rs2133939,rs62275345,rs7629647,rs62275346,rs10513309,rs1394046,rs2651316,rs2651315,rs2654817,rs4578990,rs2654818,rs2651313,rs2654819,rs2654820,rs905575,rs884370	10	7
3	73716064	rs1039955	7.60235e-11	425	86	45	107	53	134	rs9829541,rs9834016,rs34103180,rs1022170,rs2036894,rs2036893,rs6802512,rs11128357,rs11710663,rs11711513,rs11706701,3:73709791_AAT_A,rs9850935,rs1858325,rs1858324,rs4677325,rs4677326,rs9310279,rs9819637,rs9843155,3:73711292_AT_A,rs9847694,rs9824294,rs1511522,rs1511521,rs875637,rs1355467,rs1039956,rs13078725,rs4677328,rs7644807,rs34809884,rs748292700,rs1877252,rs9790264,rs9790092,rs994960,rs1567573…	10	7
3	194481900	rs4361226	3.84353e-08	179	72	28	20	42	17	rs4234201	10	7
3	183395135	rs16857992	4.82695e-08	342	27	19	17	67	212	.	10	7
4	88973006	rs2728104	1.27329e-12	172	13	24	33	8	94	rs79653755,rs142387850,rs4693920,rs2616261,rs2728123,rs2728119,rs11730059,rs4693923,rs6822046,rs4345141,rs13137113,rs2725237,rs35061532,rs2728131,rs2728118,rs2725234,rs2728113,rs28634790,rs2728109,rs2725219,rs2725217,rs2725215,4:88965493_ACAT_A,rs2728107,rs2725212,rs2725211,rs6845636,rs59994479,rs2728106,rs2725210,rs2728103,rs2728102,rs2728101,rs2728100,rs2728099,rs2728098,rs2725208,rs2728134,rs2…	10	7
5	122750972	rs6595449	7.52932e-16	592	5	24	15	59	489	rs4308481,rs4836528,rs13156484,rs1582931,rs12520233,rs1047440,rs7725869,rs6595438,rs6891155,rs2115172,rs2115173,rs748649855,rs7735212,rs11241689,rs762042055,rs34984032,rs397743989,rs34732995,rs2407778,rs1428389,rs17408002,rs17150385,rs6887350,5:122713839_TA_T,rs9942363,rs142849434,rs34720256,5:122717461_AT_A,rs11950066,rs6595440,rs13153729,rs761221355,rs13176035,rs13159477,rs13181772,rs61604748,r…	10	7
6	35009578	rs2820224	2.44741e-11	390	15	4	150	25	196	rs3823438,rs3800426,rs1568705,rs2820230,rs13191889,rs820097,rs820096,rs820094,rs820092,rs820091,rs820089,rs820087,rs820086,rs820084,rs820081,rs820080,rs820079,rs820078,rs820073	10	7
6	7830141	rs267180	3.52868e-09	162	18	50	19	22	53	rs267205,rs267207,rs387786,rs1225923,rs1235192,rs1653106,rs1225924,rs1237087,rs1228633,rs376308,rs1225926,rs382029,rs1225930,rs1225931	10	7
6	169593801	rs58955525	1.66362e-08	121	19	2	9	17	74	rs73038069,rs73038073,rs73038086,rs139436149,rs117385877,rs115752978,rs61323225,rs73040144,rs58316078,rs59048182,rs188416507,rs193225319	10	7
6	150998847	rs143799059	3.49844e-08	128	16	8	39	30	35	.	10	7
7	120806196	rs12706319	4.85264e-13	379	54	14	23	10	278	rs2110281,rs2110282,rs2110283,rs2968345,rs6956201,rs6466767,rs6961525,rs1917113,rs798933,rs798934,rs12673968,rs1554635,rs6466769,rs6954757,rs13223036,rs798943,rs566523025,rs2968338,rs1296405,rs13245677,rs798946,rs12673770,rs12706313,rs34320754,rs549829667,rs34249834,rs7801723,rs12706318,rs10953928,rs13232048,rs35758028,rs6947453,rs6952113,rs6951990,rs34770628,rs872007,rs872008,rs868053,rs884373,r…	10	7
7	151498679	rs4128399	2.04547e-12	12	0	2	0	1	9	rs34802637,rs4726099,rs56158745,rs4726100,rs62478243	10	7
7	42132748	rs66558910	4.39191e-09	130	35	10	50	6	29	rs73088676,rs67044966,rs73088681	10	7
7	115836320	7:115836320_CT_C	4.50723e-09	622	143	180	78	79	142	rs2896175,rs10953811,rs12536669,rs6977233,rs6959449,rs6977380,rs6977757,rs6949241,rs28710948,rs4082046,rs10245914,rs747202719,rs4436065,rs4535671,7:115823119_GT_G,rs6968419,rs10953813,rs36030507,rs10261818,rs10261823,rs6947586,rs11764793,rs6979486,rs6967663,rs2402053,rs10235059,rs940471	10	7
7	2871087	7:2871087_GAGTGC_G	1.12171e-08	349	40	75	50	46	138	rs798548,rs798547,rs798544,rs798528,rs798526,rs798518,rs798495,rs35957220,rs771962135,rs7784066,rs2533882,rs1713919,rs3837080,rs1182189,rs1182188,rs1182187,rs1182186,rs1182185,rs1182184,rs1182183,rs1182182,rs1182181,7:2873373_CTG_C,rs1182179,rs1182178,rs1182177,rs1182176,rs1182174,rs1183085,rs559672357,rs1182172,rs1182171,rs2533878,rs574392601,rs71524003	10	7
8	97179786	rs2514536	6.39688e-10	104	5	7	13	26	53	rs2440199,rs2514524,rs2514527,rs2514532,rs2245307,rs2514533,rs2440203,rs2245832,rs2514537,rs714552,rs2319593	10	7
8	6368810	8:6368810_AT_A	2.17151e-08	157	30	14	6	22	85	rs2167071,rs2916702,rs2959793,rs3020212,rs2922906,rs2916755	10	7
9	114074257	rs57002023	4.00785e-09	452	131	69	129	73	50	rs55873644,rs536683688,rs76180976,rs78998026,rs4978437,rs10980865,rs72607187	10	7
1	215139887	rs1452628	8.34579e-47	177	1	12	6	8	150	rs1077323,rs755576,rs1452626,rs1452627,rs6667184,rs12757359,rs1901620,rs1901621,rs10494987,rs17023910,rs12728280,rs6540873,rs2167688,rs562410,rs476557,rs1349673,rs507072,rs1452630,rs10494988,rs4517324,rs487208,rs1582113,rs7531398,rs76553563,rs12123237,rs145492984,rs1890007,rs78300504,rs11120457,rs864736,rs2077982,rs17023977,rs543029,rs76641944,rs1452631,rs495296,rs1452632,rs59084003,rs6681013,rs1…	11	4
1	215185552	rs2601645	5.3376e-28	193	3	5	16	7	162	rs12120334,rs7514200,rs76660218,rs12402694,rs6691805,rs12406318,rs544535,rs12127113,rs12134208,rs2601647,rs2841614,rs6691229,rs1349671,rs748565506,rs112698436,rs199989108,rs965283,rs115948006,rs35551944,rs1597844,rs12402962,rs2802656,rs75718025,rs75277616,rs74533295,rs76164928,rs112145672,rs12125124,rs12137068,rs181023052,rs115769130,rs75259283,rs111593735,rs112612308,rs116044621,rs114248374,rs12…	11	4
1	47980916	rs6658111	7.16414e-24	305	0	1	43	16	245	rs56270164,rs2405922,rs4603175,rs10399673,rs6673882,rs541025167,rs12090153,rs1316443,rs7552140,rs571281,rs565692,rs564914,rs557851,rs1680020,rs7526434,rs6678282,rs11211535,rs10890481,rs767682581,rs527551,rs1680018,rs543640,rs524158,rs67095259,rs538286,rs505399,rs11211538,rs6588397,rs4926556,rs6675690,rs6668106,rs6676159,rs6658691,rs7520501,rs7537074,rs7539808,rs12057975,rs12073605,rs11211540,rs11…	11	4
1	215159119	rs12079236	1.62221e-11	78	34	8	0	13	23	rs12073570,rs12078174,rs72760669	11	4
1	215153990	rs55804545	5.15822e-11	77	1	0	0	3	73	rs61818240,rs61818241,rs542497335,1:215149239_AATTT_A,rs61818243,1:215150986_TA_T,rs61818244,rs61818245,1:215154967_GA_G,rs61818248,rs61818249,rs59259176,rs59365356,rs56001365,rs56042055,rs61819975,rs76038395,rs55662674,rs60526056,rs77862354	11	4
1	215691268	rs114164928	1.07571e-09	72	62	0	0	0	10	rs12129661	11	4
10	25055291	rs952917	6.11628e-09	240	25	14	54	25	122	rs7083008,10:25028364_CAA_C,rs1414457,rs1414458,rs6482425,rs6482426,rs796440162,rs142961996,rs10828692,rs10828693,rs10828694,rs10828695,rs9943377,rs9943389,rs7068753,rs4436453,rs6482431,rs6482432,rs4072915,rs7903650,rs11014220,rs7916054,rs11014222,rs4747495,rs12246501,rs4748972,rs4748973,rs10828696,rs4748974,rs10828697,rs6482435,rs4748975,rs4748976,10:25037887_CT_C,rs10466089,rs10466090,rs1082869…	11	4
12	106476805	rs12146713	2.34571e-23	128	2	17	6	13	90	rs12369969,rs73193824,rs1427793,rs1064959,rs3741884,rs17038091,rs1978730,rs73193841,rs1896364,rs12370774	11	4
12	20665357	rs7969959	3.08215e-10	193	10	52	46	18	67	rs7316700,rs7131827,rs12822341,rs12813387,rs7959560,rs35466062,rs67369958,rs7308219,rs10841558,rs12425566,rs7965577,rs35837848,rs777532896,rs35529204,rs35340841,rs7487165,rs7304026,rs6487100,rs6487101,rs10770666,12:20681788_CAG_C,rs11045298,rs4502032,rs4353322,rs7303620,rs4598713,rs4762970,rs7308418,rs10770668,rs4304839,rs4627131	11	4
12	20368269	rs60691990	6.13249e-10	41	14	7	3	5	12	rs73073676,rs73073694,rs73075659	11	4
13	50807266	rs2580190	1.8753e-09	213	17	51	20	71	54	rs769656666,13:50806063_AAACAAC_A,rs2765767,rs2812196,rs1326127,rs2066660	11	4
14	61957390	rs3783768	2.79234e-08	144	31	13	5	9	86	rs3783770,rs8013527,rs17098533	11	4
15	85693016	rs2342118	1.47684e-22	738	19	131	143	71	374	rs778400737,rs896364,rs12439802,rs7173332,rs62022525,rs12900078,rs116893322,rs771417755,rs34585903,rs796672389,rs67613323,rs11629962,rs11629963,rs7163965,rs71397835,rs62022527,rs8028550,rs62022528,rs7359256,rs4980341,rs11439217,rs66550763,rs62021182,rs4980340,rs62021184,rs3077007,rs11629967,rs8026543,rs1023844,rs2122858,rs12903975,rs12904615,rs3862411,rs35000527,rs35816571,rs36184157,rs12900736,r…	11	4
15	85364221	rs58932296	3.12271e-09	559	77	46	273	94	69	rs34337729,rs8039472,rs2115630,rs8024538	11	4
16	87221841	16:87221841_ATG_A	3.03685e-17	168	17	2	15	11	123	rs9783786,rs9888792,rs111864226,rs12711472,rs12711473,rs9308341,rs9308342,rs9308343,rs9308344,rs9937293,rs4843227,rs4843560,rs4843226,rs4843559,rs4843558,rs4843557,rs7205039,rs9933149,rs12921714,rs12921347,rs12920553,rs12922411,rs12921170,rs4843556,rs7196520,rs7203251,rs56023709,rs6540016,rs7185688,rs11644651,rs7191546,rs6540017,rs11860417,rs4843555,rs12149643,rs4843554,rs4843553,rs4843552,rs8047…	11	4
17	55427586	rs368655017	5.73071e-10	148	4	6	27	38	73	rs13353194,rs6503805,rs11079287,rs2332902,rs7501571,rs1534307,rs4794720,rs4794721,rs792401,rs894623,rs792400,rs792399,rs792394,rs792388,rs792386,rs792385	11	4
18	60903629	18:60903629_CA_C	1.11883e-18	31	0	0	0	0	31	rs7243091,rs12957119,rs71162605,rs12967026,rs113421548,rs71162607,rs12964435,rs71353381,rs12970504,rs6567331,rs11877925,rs7242542,rs3810027,rs4987768,rs17070848,rs8083946,rs11152374,rs11663275,rs12970840,rs12961976	11	4
19	3457058	rs12980469	2.2098e-08	124	26	35	43	7	13	.	11	4
2	56127099	2:56127099_AT_A	1.56535e-13	298	67	54	37	18	122	2:56116193_TTGATTCTTGGCCTCCCTCCC_T,rs7596872,rs78857879,rs4233964,rs11894650,rs2868435,rs3762515,rs113481311,rs146896516,rs144603191,rs11400437,rs80028351	11	4
2	189899079	rs56339059	9.43935e-10	730	4	2	2	196	526	rs56674124,rs55881040,rs7419916,rs73981481,rs538494588,rs73981485,rs12886,rs73981487,rs7586,rs78905646,rs73981488,rs73981489,2:189901251_TA_T,rs74787438,rs59291399,rs77183421,rs55749146,rs199978925,rs59631824,rs59397955,rs57047644,rs73978809,rs73978810,rs73978811,rs73978812,rs56063417,rs73978820,rs35852101,rs60863981,rs13421370,rs73978835,rs73978837,rs74787666,rs77146202,rs73978855,rs73980135,rs5…	11	4
22	21051987	rs28538662	4.2255e-08	505	24	78	50	17	336	rs5760225	11	4
3	194478411	rs4393849	1.38187e-24	179	1	1	14	37	126	rs6437412,rs4677737,rs10933668,rs10933669,rs12495984,rs58005101,rs6777925,rs62290988,rs60799707,rs58357770,rs57295137,rs7627816,rs59925255,3:194474334_CG_C,rs57989961,rs35211338,rs59862670,rs4677635,rs34115034,rs4677636,rs4677637,rs4677638,rs4677639,rs4234200,rs4324426,rs4311168,rs3890435,rs3890436,rs11920491,rs3890437,rs7613256,rs7617609,rs7613463,rs11919157,rs62291017,rs4416332,rs4234201,rs4677…	11	4
3	73705918	rs2036894	4.51015e-09	424	83	133	90	30	88	rs9829541,rs9834016,rs34103180,rs1022170,rs2036893,rs11128357,3:73709791_AAT_A,rs1355467,rs1039956,rs1039955,rs13078725	11	4
5	122755562	rs7706662	8.79747e-09	644	305	66	34	22	217	rs35348432,rs6595444,rs6862676,rs6889862,rs6868198,rs6595448,rs6884601,5:122754293_GTT_G,rs7729285,rs60940635,rs7706501,rs7707090,rs11953651	11	4
6	35009578	rs2820224	6.74021e-21	390	1	4	16	5	364	rs2064254,rs10947525,rs58737173,rs72894025,rs11758962,rs62402666,rs9469918,rs9394252,rs13219624,rs7739991,rs6918872,rs9296139,rs3800451,rs2092428,rs7757211,rs9357188,rs2473613,rs2504162,rs12205331,rs847852,rs847843,6:34922921_CT_C,rs6932857,rs3823438,rs9784818,rs4432973,rs7759369,rs12212217,rs10807144,rs10807145,rs2140418,rs10947536,rs2177381,rs12661991,rs2504168,rs2820234,rs2820233,rs2820232,rs2…	11	4
6	30947509	rs3094084	3.54656e-13	1771	187	170	361	278	775	rs3131112,rs3094694,rs3094024,rs3094023,rs3130117,rs3130247,rs3130241,rs3132610,rs9262120,rs3095276,rs9262126,rs9262130,rs9262131,rs9262132,rs9262135,rs9262141,rs9262142,rs9262143,rs138394556,rs9262146,6:30666445_CGA_C,rs3132585,rs3132583,rs3132582,rs3094128,6:30694863_CTA_C,rs34999479,rs1064627,rs3095327,rs3130658,rs3130660,rs3130661,rs1059612,rs3094125,rs3130662,rs3129972,rs3129973,rs3095332,rs…	11	4
6	30122657	rs2523735	8.31386e-12	1971	124	69	129	337	1312	rs3131894,rs3116813,rs9258375,rs3094176,6:29924136_AG_A,rs3132685,rs3094146,rs3115631,rs8321,rs9261290,6:30055930_GA_G,rs1264706,rs1264705,rs2517664,rs2517601,rs2523992,rs2023473,rs2523989,rs2239529,rs2427749,rs2523988,rs2249099,rs2523987,rs2517598,rs2844793,6:30080763_TAAAG_T,rs2844792,rs2517597,rs2523986,rs2523985,rs2523984,rs2523983,rs2245420,rs2523982,rs2523981,rs2523980,rs2523979,rs2523978,r…	11	4
6	29607101	rs3131856	4.90112e-10	417	208	27	39	47	96	rs1535039,rs2523443,rs2143668,rs2746150,rs1234844,rs1233491,rs1233489,rs1233488,rs2523431,rs408623,rs389419,rs404240,rs413670,rs1235162,rs1233396,rs926552,rs1233393,rs1233385	11	4
6	31465047	rs3094005	3.18602e-09	701	181	202	63	36	219	rs3099843,rs3099844,rs3130908,rs3130909,rs3131642,rs3132470,rs3094011,rs3094010,6:31456679_TG_T,rs3130923,rs3095233,rs3130616,rs3134900,rs3130614,rs3130612,rs9267445,rs35405369,rs9267488,rs1800628,rs3130063,rs3130631,rs3132450,rs3117582,rs3117581,rs3132449,rs9267531,rs9267539,rs3131383,rs3101018,rs3131381,rs3131380,rs3132445,rs3132443,rs3130484,rs3117573,rs3131379,rs3117574,rs3131378,rs3117575,rs…	11	4
6	32066447	rs1265888	1.17102e-08	1073	73	343	216	192	249	rs367364,rs369580,rs394439,rs369637,rs1150758,rs1265889,rs1150755,rs1150754,rs3134962,6:32302103_TTG_T,rs1265754,rs2849018,rs910051,rs2395149,rs2894251,rs2395151,6:32346463_ATTTTGTG_A,rs3117103	11	4
6	32601885	rs9272202	1.22749e-08	2507	935	260	594	224	494	rs9272139,rs2040410,rs2040409,rs2395227,rs2395228,rs1794520,rs1794519,rs1794280,rs1794277,rs1613056,rs1794511,rs1794530,rs1794274,rs1794272,rs1794528,rs1617322,rs9275576	11	4
6	34913762	rs202106326	1.63834e-08	654	329	154	12	65	94	.	11	4
6	28677045	rs780222578	2.3657e-08	1011	520	81	103	10	297	.	11	4
6	793765	rs4959434	3.93161e-08	28	3	2	4	0	19	.	11	4
7	102579193	rs6968713	2.42061e-18	590	6	10	67	106	401	rs73406218,rs9641299,rs77490360,rs10464611,rs11974748,rs4489255,rs4361704,rs149805825,rs12672488,rs9691949,rs199970642,rs9718444,rs56356294,rs7800387,7:102433003_AG_A,rs74708264,rs201793827,rs142264290,rs2908412,rs3933460,rs6975388,rs140795860,rs80313245,rs12671557,rs75387186,rs57253646,rs7780981,rs7779121,rs6946773,rs12538955,rs11981980,rs75197737,rs58919995,rs73406250,rs10487283,rs12669668,rs43…	11	4
7	151498679	rs4128399	2.11286e-14	12	1	0	2	0	9	rs34802637,rs4726099,rs56158745,rs4726100,rs62478243,rs13224758	11	4
7	134388240	rs2347697	1.40701e-08	182	45	8	2	6	121	rs34845444,rs4728335,rs4524734,rs10954464,rs11762352,rs2347696,rs2347698,rs6973339,rs6467551,rs6944563	11	4
1	215139887	rs1452628	7.22442e-34	177	3	9	8	8	149	rs1077323,rs755576,rs1452626,rs1452627,rs6667184,rs12757359,rs1901620,rs1901621,rs10494987,rs17023910,rs12728280,rs6540873,rs2167688,rs562410,rs476557,rs1349673,rs507072,rs1452630,rs10494988,rs4517324,rs487208,rs1582113,rs7531398,rs76553563,rs12123237,rs145492984,rs1890007,rs78300504,rs864736,rs2077982,rs17023977,rs543029,rs76641944,rs1452631,rs495296,rs1452632,rs59084003,rs6681013,rs12403837,rs1…	12	4
1	215185552	rs2601645	3.55462e-18	193	8	17	15	84	69	rs12120334,rs7514200,rs76660218,rs12402694,rs6691805,rs12406318,rs12127113,rs12134208,rs2601647,rs2841614,rs6691229,rs1349671,rs748565506,rs112698436,rs965283,rs115948006,rs35551944,rs1597844,rs12402962,rs75718025,rs75277616,rs74533295,rs76164928,rs112145672,rs12125124,rs181023052,rs115769130,rs75259283,rs111593735,rs112612308	12	4
1	208005668	rs113535756	6.90255e-10	500	41	171	54	57	177	rs2724377,rs2745972,rs761276,rs866511,rs761277,rs2724373,rs2488249,rs747691099,rs2796236,1:208021041_TA_T,rs1204707,rs2745981,rs2745982,rs2796241,rs2796242,rs2796244	12	4
1	155198222	rs11580040	7.29448e-10	138	3	3	8	16	108	rs140676308,rs141942982,rs111508230,rs41264915,rs35154152,rs67579710,1:155198264_CG_C	12	4
10	120784977	rs494469	1.42463e-10	248	11	41	12	20	164	rs2420492,rs904977,rs10886369,rs494526,10:120785227_GGCCCCACT_G,rs609163,rs608660,rs7905458,rs592580,rs1500986,rs11198741,rs745873901,rs10787899,rs565922,rs3740553,rs658352,rs72509488,rs67487722,rs608790,rs530409,rs669964,rs34715807,rs671736,rs10886373,rs10886374,rs10886377,10:120830074_AT_A,rs11198754,rs1397617,rs10400136,rs4259754,rs12264824,10:120837900_TA_T,rs3824830,rs11198762,rs56952275,rs1…	12	4
10	50313621	rs4509682	6.10408e-09	411	114	44	41	2	210	rs2250349,rs2943253,rs61850683,rs6537493,rs7897289,rs4128908,rs7906722,rs12269023,rs4129035,rs4317903,rs4403731,rs7093398,rs7097933,rs6537497,rs12246766,rs13088,rs5784790,rs5784791,rs4073712,rs4073711,rs4838446,rs4344406,rs12240534,rs12255055,rs7072243,rs4559606,rs4558091,rs4838365,rs4838366,rs4838367,rs12776553,rs35666409,rs12267388,rs11100988,rs11100989,rs11100990,rs4532948,rs4412679,rs4497320,…	12	4
10	94539856	rs7100186	3.38523e-08	280	26	110	82	52	10	.	12	4
11	27465591	rs4074516	3.48924e-08	348	16	108	77	29	118	.	12	4
12	28289724	rs7305790	7.82958e-11	821	393	9	17	78	324	rs75547058,rs144396101,rs17575785,rs17603585,rs59084530,rs78804134,rs10459088,rs10459089,rs7316732,rs1904387,rs1993936,rs2127316,rs1351266,rs7971974,rs35247497,rs12229872,rs11049364,rs11049365,rs11049368,rs16932640,rs7977538,rs1965280,rs1463571,rs2881787,rs4931727,rs4931729,rs4931730,rs11049373,rs10843115,rs2127315,rs35787832,rs11049380,rs2035271,rs60025108,rs7487773,rs34043014,rs10492370,rs98149…	12	4
12	28128832	rs76301015	2.56449e-10	201	55	79	32	16	19	rs61915978,rs11049248,rs11049250,rs73094066,rs11049252,rs10843047,rs10843048,rs10843049,rs11049254,rs11049255,rs11049256,rs33083,rs61915983	12	4
12	20772365	rs12312310	6.63678e-09	177	95	30	10	8	34	rs11045332,rs4595594,rs6487123,rs7953367	12	4
15	85672905	15:85672905_GT_G	9.67165e-10	734	152	45	184	116	237	rs67613323,rs11629962,rs11629963,rs17611171,rs12912860,rs17611396,rs12902942,rs12909971,rs12900012,rs12909130,rs72757059,rs77255035,rs11632658,rs11630697,rs62019482,rs35845738,rs17540307,rs12914463,rs4843019,rs11637512,rs17541051,rs35668291,rs994989,rs6496733,rs8041189,rs8037886,rs12909477,rs5814186,rs2342118,rs4843021,rs8042888	12	4
15	71587373	rs3743111	4.3909e-09	270	117	45	34	38	36	rs7175468,rs35939630,rs12901296,rs28398466,rs1606887,rs11631778,rs28529655,rs4337253,rs1441358,rs11853359	12	4
16	10756247	rs2719655	2.53862e-08	284	56	15	94	53	66	.	12	4
17	68054190	rs12451495	1.16381e-09	152	13	1	84	30	24	rs180171,rs180186,rs2190604,rs12600653,rs11652259,rs2215006,rs8072749,rs2108436,rs4411538,rs78074080,rs72856781,rs2017078,rs2016866,17:68060837_CT_C,rs12452754,rs12602679,17:68068576_TA_T,rs1990197,rs12940346,rs11867479	12	4
17	54228221	rs75766859	1.15746e-08	201	4	70	1	0	126	rs1431325,rs1431324,rs1864648,rs1431323,rs2217507,rs994421,rs9913362,rs10852980,rs11869942,rs11869943,rs7226326,rs8066021,rs1367692,rs8067691,rs1431321,rs1431320,rs1431319,rs768794,rs11079211,rs11079212,rs1431312,rs1431313,rs58161109,rs4427864,rs796714706,rs8082496,rs9909221,rs7207503,rs1968155,rs1476917,rs11871044,rs11871068,rs3922293,rs1548811,rs2110213,rs1990498,rs6505042,rs7207059,rs6505045,r…	12	4
17	54574631	rs8070286	1.69258e-08	245	33	37	56	31	88	rs1372854,rs1372855	12	4
18	42425883	rs687971	9.80418e-17	119	1	11	7	15	85	rs11392808,rs34038580,rs28600969,rs12965289,rs35857171,rs665997,rs644286,rs622759,rs626498,rs661638,rs661251,rs614797,rs659583,rs678726,rs1276249,rs1291324,rs654269,rs881433,rs881434,rs1036929,rs11082412,rs34535142,rs8088989,rs2361050,rs9807721,rs9945057,rs4890273,18:42485544_TA_T,rs4890274,rs9944845,rs1025912,rs12606696,rs9675825,rs9675835,rs12150717,rs4616370,rs4372775,rs12326746,rs8090822,rs80…	12	4
19	18020447	rs78990594	4.79787e-08	60	0	9	37	3	11	.	12	4
2	55941266	rs115322503	1.63722e-08	365	32	34	20	31	248	.	12	4
2	71838597	rs2303606	1.66227e-08	48	2	5	11	2	28	rs934063,rs7607821	12	4
20	10739837	rs765811681	1.04002e-12	49	3	22	10	6	8	rs6134023,rs41280286,rs77272398,rs34464330,rs6134038	12	4
20	11261762	rs2024621	1.13694e-08	407	26	103	136	54	88	rs755572121,rs6033091,rs6040514,rs6108906	12	4
20	38653335	rs6124205	4.73415e-08	120	25	33	37	4	21	.	12	4
3	194474928	rs4677637	3.33197e-10	180	21	25	49	21	64	rs10933668,rs6777925,rs4393849,rs4234201,rs4361226,rs10933671,rs4677743,rs6798915,rs4677744,rs6437417	12	4
3	100663231	rs2595903	1.31978e-08	215	75	99	16	13	12	.	12	4
5	76023494	rs2227831	1.87468e-08	156	93	22	22	8	11	rs34592828,rs17568628	12	4
6	35013209	rs13191889	3.15302e-11	377	172	34	24	45	102	rs3823438,rs2091074,rs3800426,rs2820224,rs1568705,rs2820230	12	4
6	45357980	6:45357980_TG_T	1.44877e-08	690	109	42	17	30	492	rs11970496,rs11965706,rs17209636,rs62436782,rs17209678,rs10948217,rs12209175,rs375114507,6:45235568_GC_G,rs62400313,rs62400326,rs12199871,rs12214749,rs11966878	12	4
6	151021978	rs12192990	4.55925e-08	131	10	19	20	46	36	.	12	4
7	19606832	rs13238033	8.26997e-19	407	8	18	10	16	355	rs4721778,rs4721779,rs4721780,rs4719563,rs4719564,rs4719565,rs10245919,rs12534570,rs12536555,rs2024347,rs2192486,rs4602789,rs1476944,rs759249,rs759248,rs10269875,rs917919,rs917918,rs917917,rs2192485,rs2192484,rs10230658,rs10244808,rs6963439,rs7794428,rs146273948,rs2192482,rs7789868,rs10276556,rs71017060,rs2390118,rs12700056,rs12700057,rs9648259,rs9648260,rs9648261,rs12700058,rs12535260,rs12532587…	12	4
7	120873078	rs1534016	4.30756e-12	375	3	42	34	16	280	rs798943,rs2968338,rs1296405,rs13245677,rs798946,rs12673770,rs12706313,rs34320754,rs549829667,rs34249834,rs7801723,rs12706318,rs10953928,rs13232048,rs35758028,rs6947453,rs6952113,rs6951990,rs34770628,rs872008,rs868053,rs884373,rs10234955,rs10235232,rs10275439,rs10261671,rs10280039,rs13245690,rs35348547,rs10258619,rs1917110,rs1404264,rs776700095,rs6950680,rs66871562,rs35789132,rs12706319,rs1112810…	12	4
7	102564830	rs847656	2.54595e-09	590	94	86	147	68	195	rs7779145,rs7804322,rs6967389,rs12666764,rs2411056,rs60524601,7:102493317_GAA_G,rs56894117,rs6945369,rs140064303,rs143740918,rs181753416,rs57350619,rs58680618,rs57776797,rs9690210,rs60599650,rs3779029,rs6976005,rs12667218,rs147068351,rs11983456,rs11983521,rs11973870,rs11973896,rs11980643,rs73406284,rs11982616,rs11972644,rs59278165,rs58191643,rs57545514,rs56921864,7:102501445_CAT_C,rs12540384,rs11…	12	4
7	50880184	rs6593200	4.73371e-08	374	113	26	32	75	128	.	12	4
8	120016374	rs4355805	1.20745e-09	437	76	42	42	29	248	rs7010267,rs4319131,8:119947800_ACTTTC_A,rs1982763,rs6469788,8:119954477_GCC_G,rs10611942,rs6415470,rs7463176,rs11573829,rs11573824,rs3102732,rs6469789,rs10675263,rs10955915,rs2073617,rs4242592,rs7006553,rs34037488,rs10505348,rs7014574,rs13264791,rs4335155,rs5894469,rs1905784,rs1905783,rs4354338,rs6469794,rs4273881,rs6469795,rs4336637,rs7838083,rs67819415,rs9650075,rs34264040,rs7013203,rs6469796,…	12	4
8	145036615	rs7010330	3.7431e-09	177	0	1	8	30	138	rs6558406,rs7819099,rs6984820,rs6992333,rs6558407,rs11777402,rs7833924,rs11778026,rs11786903,rs11786934,rs7016416,rs7002002,rs1140522,rs2857829,rs55836855,rs55646585,rs56117011,rs35916068,rs7002152,rs7016860,rs6993953,rs7006770,rs7017644,rs7017789,rs56401829,rs55895668,rs55984967,rs55812715,rs11782890,rs11136333,rs11136334,rs3135109,rs11993233,rs62522555,rs72693398,rs62522556,rs35671527,rs1086691…	12	4
1	47980916	rs6658111	1.09118e-47	305	6	17	26	12	244	rs61784776,1:47835699_GTC_G,rs55918644,rs56328227,rs12119783,rs56270164,rs6662814,rs6673934,rs55718554,rs2405922,rs4603175,rs10399673,rs6673882,rs2622909,rs12070024,rs9436899,rs2820970,rs2820971,1:47891688_AT_A,rs2622921,rs2820974,rs2622920,rs761499486,rs541025167,rs12090153,rs2622917,rs3738315,1:47905555_AG_A,1:47905782_CTTT_C,rs1316443,rs7552140,rs571281,rs565692,rs564914,rs557851,rs1680020,rs7…	13	9
1	215139887	rs1452628	6.8157e-19	177	26	5	97	3	46	rs755576,rs6540873,rs562410,rs476557,rs507072,rs10494988,rs487208,rs7531398,rs76553563,rs12123237,rs145492984,rs1890007,rs78300504,rs864736,rs17023977,rs543029,rs76641944,rs495296,rs1452632,rs59084003,rs6681013,rs12403837,rs12123258	13	9
1	47954232	rs530520	6.20518e-13	196	7	3	9	5	172	rs10437097,rs6699343,rs3814005,rs12035995,rs6697911,rs6674100,rs870357,rs4926870,rs17103251,rs17103253,rs4926871,rs12046016,rs6689636,rs72902514,rs10789508,rs533894,rs545670,rs502997,rs570605,rs517384,rs498352,rs578633,rs518025,rs10158498,rs10158499,rs1337527,rs10749868,rs7537527,rs7544826,rs7528714,rs7547288,rs10890483,rs10890484,rs10890485,rs7543774,rs2065946,rs2065947,rs2065948,rs7540974,rs141…	13	9
1	215185552	rs2601645	2.71037e-09	193	30	76	23	5	59	rs12120334,rs7514200,rs76660218,rs12402694,rs6691805,rs12406318,rs2841614,rs6691229,rs748565506,rs965283	13	9
1	47953368	rs78049119	2.84111e-08	23	9	3	3	0	8	.	13	9
10	25059463	rs7911992	1.11984e-08	240	15	17	13	60	135	rs1414459,rs951857,rs10764494,rs4747499,rs4747501,rs10741065,rs10764496,rs10828700	13	9
12	106476805	rs12146713	8.57758e-15	128	97	11	1	9	10	rs1978730,rs12370774	13	9
12	85576492	rs11609649	1.70876e-10	290	10	3	66	27	184	rs140287439,rs12821628,rs12827555,rs56166460	13	9
12	46755112	rs7961994	8.84703e-10	539	48	67	94	19	311	rs763443853,rs1471223,rs1492894,rs2408507,rs2408508,rs532477439,rs7132228,rs4768115,rs4768116,rs4547171,rs2169030,rs1079780,rs12816358,rs12317787,rs9668077,rs4768698,rs7974529,rs7960147,rs75630105,rs3782904,rs2307061,rs7968173,rs7968283,rs956910,rs3832874,rs10880959,rs10880960,rs7315480	13	9
13	51340315	rs592333	1.14796e-09	98	4	10	84	0	0	.	13	9
15	85693016	rs2342118	2.52346e-15	738	144	157	78	62	297	rs67613323,rs11629962,rs11629963,rs62022527,rs8028550,rs62022528,rs4980341,rs11439217,rs66550763,rs62021182,rs4980340,rs62021184,rs11629967,rs2122858,rs12903975,rs289418,rs190840,rs35249102,rs550227184,rs289393,rs17611171,rs289392,rs12908400,rs12912860,15:85573935_CTT_C,rs17611290,rs289390,rs289389,rs289388,rs12906544,rs439313,rs289382,15:85578937_TG_T,rs17611396,rs34978449,rs4296226,rs289386,rs3…	13	9
17	7498812	17:7498812_GTCTC_G	5.46218e-09	360	107	120	32	51	50	rs9901673,rs62059826,rs12944649,rs12936934,rs17643401,rs12938899,rs9898876	13	9
17	43675431	rs374316043	1.29976e-08	2669	41	89	16	27	2496	rs2469938,rs62064415,rs537920412,rs391338,17:43931855_GAGAGAGAC_G	13	9
17	44316449	rs62073098	1.7193e-08	729	14	16	6	2	691	rs141004635,rs1881194,rs2696662,rs2532270,rs2532269,rs2532267,rs956329,rs62060916,rs2696665,rs2696666,rs2732644,rs2532265,rs2532264,rs2532259,rs2732646,rs2732647,rs2532257,rs2532255,rs2696696,rs740707,rs740706,rs758523,rs2141301,rs2141302,rs2696700,rs2696702,rs2732587,rs2696704,rs62060921,rs62060922,rs2696707,rs2696708,rs2532243,rs2532241,rs2732589,17:44266531_G_A,rs2732595,rs1918788,rs2696526,rs…	13	9
17	55533169	rs12950125	4.20415e-08	49	0	4	36	6	3	.	13	9
18	60894307	rs12964435	8.96699e-26	31	0	0	0	0	31	rs7243091,rs11659758,rs12957119,rs71162605,rs12961672,rs12967026,rs8095050,rs113421548,rs71162607,rs71353381,rs9630855,18:60895761_CA_C,rs12970504,rs6567331,rs11877925,rs7231914,rs768148501,rs7242542,18:60902377_GA_G,18:60903629_CA_C,rs3810027,rs4987768,rs17070848,rs8083946,rs11152374,rs11663275,18:60907571_CCTTT_C,rs34385891,rs12970840,rs12961976,rs7240326	13	9
18	19028164	rs12604773	5.46869e-10	441	9	33	127	11	261	rs8096762,rs7237677,rs8085654,rs201206134,rs115795466,rs9955366,rs2127958,rs7231120,rs12956671,rs11660183,rs11270770,rs9946988,rs9947069,rs8099122,rs291795,18:18981917_AT_A,rs2117317,rs291792,rs10084015,rs10084018,rs2586202,rs2570959,rs2586201,rs9960109,rs4800660,rs291782,rs291781,rs59457916,rs291785,rs1006260,rs35483127,rs9962995,rs1469768,rs11083182,rs9947441,rs9951188,rs8098135,rs71178183,rs80…	13	9
2	205591727	rs961805	1.6453e-08	347	9	10	111	173	44	.	13	9
3	194470632	rs10933668	3.21991e-18	180	6	4	55	30	85	rs6437412,rs10933669,rs12495984,rs58005101,rs6777925,rs62290988,rs60799707,rs58357770,rs7627816,3:194474334_CG_C,rs4677637,rs3890435,rs3890436,rs11920491,rs7613256,rs7617609,rs7613463,rs11919157,rs4416332,rs4393849,rs4234201,rs9843739,rs4361226,rs10933671,rs4677742,rs10451856,rs112831558,rs73079362,rs4677743,rs73081332,rs6798915,rs4677744,rs6437415,rs6437417,rs10460776	13	9
6	35009578	rs2820224	6.26021e-13	390	17	25	57	185	106	rs58737173,rs11758962,6:34922921_CT_C,rs3823438,rs3800426,rs2820223,rs1568705,rs2820230,rs13191889,rs820097,rs820096,rs820094,rs820092,rs820091,rs820089,rs820087,rs820086,rs820084,rs820082,rs820081,rs820080,rs820079,rs820078,6:35035661_CA_C,rs820073,rs2689097,rs2762342,6:35064812_ATT_A,rs2762344,rs6457800	13	9
6	31239449	rs28626310	1.29849e-08	1910	570	138	296	296	610	rs2524086,rs2853949,rs2844614,rs2844613,rs2853947,rs2524067,rs2524065,rs2844609,rs2853945,rs2853942,rs1634772,rs1634767,rs1631951	13	9
6	31456840	rs113551020	2.3613e-08	1403	107	327	547	257	165	.	13	9
6	32347070	6:32347070_AAT_A	3.0421e-08	2989	298	334	425	942	990	rs2050189,rs3129950,rs3129956,rs7773668,rs3129966,rs2395160,rs3129843,rs7763411	13	9
7	102577433	rs6465885	8.74272e-15	591	18	29	93	67	384	rs73406218,rs9641299,rs77490360,rs10464611,rs11974748,rs4489255,rs4361704,rs149805825,rs12672488,rs9691949,rs199970642,rs9718444,rs56356294,rs7800387,7:102433003_AG_A,rs74708264,rs142264290,rs2908412,rs3933460,rs6975388,rs140795860,rs80313245,rs12671557,rs75387186,rs57253646,rs7780981,rs6946773,rs12538955,rs11981980,rs75197737,rs58919995,rs73406250,rs10487283,rs12669668,rs17136090,rs12668434,rs59…	13	9
7	151498679	rs4128399	6.32792e-14	12	0	0	2	2	8	rs34802637,rs4726099,rs56158745,rs4726100,rs13224758	13	9
8	10490218	rs13259086	3.20838e-08	1386	369	189	366	191	271	.	13	9
16	87235867	rs4240792	1.78022e-09	156	13	14	30	21	78	rs4843554,rs4240790,rs751969536,rs4240787,rs4240786,rs4843549	14	3
2	188390112	rs13035938	3.76784e-11	601	5	38	87	136	335	rs13427277,rs62172508,rs62172509,rs11694265,rs1918902,rs62172510,rs113111008,rs1918898,rs16828714,rs2049693,rs13390389,rs13404250,rs754882293,rs62172532,rs62172533,rs72896770,rs10174942,rs62172550,rs13382346,rs11688157,rs11688116,rs13392947,rs13418561,rs60343740,2:188152053_CTT_C,rs1706246,rs7606059,rs7592141,rs7592255,rs10190916,rs1728666,rs1728667,rs1728668,rs1706249,rs1728669,rs1728670,rs15282…	14	3
4	99251006	rs6532731	2.1137e-08	144	9	82	46	4	3	.	14	3
6	39539617	rs4714262	2.83008e-08	374	139	53	95	42	45	rs1520	14	3
1	215144758	rs7531398	1.18763e-15	198	13	18	54	47	66	rs755576,rs6540873,rs12120334,rs7514200,rs1452628,rs10494988,rs76553563,rs12123237,rs145492984,rs78300504,rs17023977,rs76660218,rs76641944,rs12402694,rs59084003,rs6691805,rs12406318,rs12403837,rs12123258,rs2601647,rs2601645,rs2841614,rs6691229,rs1349671,rs748565506,rs112698436,rs199989108,rs965283,rs115948006,rs35551944,rs1597844,rs12402962,rs75718025	15	9
1	43764084	rs3120047	2.60458e-12	230	1	2	74	16	137	rs3120124,rs1209384,rs3768046,rs6690243,rs4660729,rs1556580,1:43771016_TA_T,rs3120044,rs3120122,rs1556581,rs2275180,rs1467808,rs1467809,rs2282226,rs3120276,rs2991990,rs151303622,rs1198982,rs1199039,rs866332,rs12076751,rs1209702,rs1199038,rs12058355,rs839993,rs710252,rs1749959,rs35732878,rs111888775,1:43808605_CT_C,rs1199036,rs1760670,rs839995,rs839996,rs72669002,rs1760669,1:43824489_GC_G,rs839763…	15	9
1	22649994	rs10917209	9.68101e-09	109	6	28	32	30	13	rs4598465,rs6143162,rs6690148	15	9
10	21908803	rs1243188	3.05512e-09	348	101	24	6	12	205	rs12770228,rs11012725,rs946711,rs12253527,rs1416901,rs11275375,rs12784277,rs61850044,rs7894565,rs7905967,rs6482188,rs35587371,rs12783517,rs12769128,rs10828256,rs11592565,rs12356674,rs11012750,rs11012753,rs1243185,rs1243187,rs1270799,rs2026092,rs1243179,rs61129347,rs1243180,rs1243182,rs7090708,rs10828258,rs1243184,rs1243189,rs1269454,10:21954230_TGG_T,rs138942406,rs2183271,10:21978530_TTA_T,rs1243…	15	9
11	27314069	rs10767630	4.91045e-09	342	6	54	120	38	124	rs34493522,rs10835148,rs7483297,rs7948420,rs1038099,rs1871255,rs1038100,rs1351175,rs6416055,rs7480454,rs7950903,11:27285591_TTAG_T,rs11029901,rs7120368,rs7478918,rs1478690,rs7481109,rs7484147,rs7481148,rs7937389,rs6484283,rs6484284,rs6484285,rs7110359,rs10835150,rs7115024,rs7115157,rs6484286,rs6484287,rs7119628,rs7123838,rs7123749,rs7126943,rs10767625,rs7102043,rs7105320,rs7105447,rs7121791,rs710…	15	9
12	28128889	rs61915978	4.90313e-13	217	2	6	39	51	119	rs10771398,rs997199,rs76301015,rs11049248,rs11049250,rs73094066,rs11049252,rs10843047,rs10843048,rs10843049,rs11049254,rs11049255,rs11049256,rs42294,rs11049257,rs33083,rs11049272	15	9
12	28221974	rs6487659	2.68309e-12	148	1	19	27	17	84	rs10843072,rs10771401,rs146796447,rs10843073,rs10771402,rs10843075,rs7980250,rs11049303,rs61915994,rs11611940,rs11615869,rs11614036,rs11615908,rs11049304,rs61915995,rs61915996,rs11049305,rs7978356,rs11049306,rs7972874,12:28203638_CA_C,rs11049315,rs10843080,rs229988,rs7312390,rs6487657,rs6487658,rs11049320,rs1842194,rs1600345,rs11049322,rs7975563,rs11049323,rs10843083,rs10843084,rs10843085,rs10843…	15	9
12	28309180	rs2127315	4.53366e-11	964	49	138	240	363	174	rs78804134,rs7316732,rs1904387,rs1993936,rs2127316,rs1351266,rs35247497,rs7305790,rs12229872,rs11049365,rs11049368,rs16932640,rs7977538,rs1965280,rs1463571,rs2881787,rs4931727,rs4931729,rs4931730,rs11049373,rs10843115,rs35787832,rs11049380,12:28317157_AAT_A,rs2035271,rs60025108,rs7487773,rs34043014,rs10492370,rs981494,rs1118097,rs7316299,rs7139154,rs11049411,rs10459090,rs10459091,rs1841964,rs3509…	15	9
16	82132288	rs8191248	2.16836e-09	99	3	0	8	24	64	rs1364287,rs1017243,rs1017242,rs2911420,rs2966249,rs9934209,rs2966248,rs8182164,rs7499494,rs1364286,rs1364285,rs4888202,rs9940004,rs9925455,rs8191243,rs996752,rs996751	15	9
16	73087494	rs4788697	3.93799e-08	41	19	12	3	0	7	.	15	9
17	54295573	rs28572117	2.36823e-09	233	24	49	14	4	142	rs1431322,17:54187942_AGATT_A,rs1367692,rs8066871,rs8067691,rs1431321,rs1431320,rs1431319,rs17212907,rs1431318,rs1431317,rs768794,rs11079211,rs11079212,rs1431312,rs1431313,rs17212942,rs58161109,rs4427864,rs796714706,rs1367694,rs7213834,rs7219663,rs16956679,rs1035071,rs12600483,rs7224057,rs12150037,17:54208295_GT_G,rs16956698,rs16956700,rs16956701,rs11870568,rs8079380,rs8080968,rs8082496,rs9909221…	15	9
17	54264960	rs8073240	6.75752e-09	85	47	16	0	0	22	17:54191216_GAGAT_G,rs6505040,rs1548811,rs1990498,rs6505041,rs6505042,rs7207059,rs6505045,rs2332597,rs6505046,rs8068705,rs6505047,rs8075791,rs8070779,rs9303383,rs2110214,rs2159975,rs9911321,rs887787,rs4793805,rs9905454,rs9902365	15	9
18	42444241	rs654269	3.43297e-10	134	21	4	37	33	39	rs11392808,rs34038580,rs28600969,rs12965289,rs35857171,rs687971,rs665997,rs644286,rs622759,rs626498,rs661638,rs661251,rs614797,rs659583,rs678726,rs1276249,rs1291324,rs881433,rs881434	15	9
20	11285245	rs722568	2.27764e-12	407	28	56	42	71	210	rs2024621,rs988788,rs6078118,rs755572121,rs6033091,rs1997877,rs1997876,rs6040514,rs6033092,rs6040515,rs6033095,rs6108906,rs6108909,rs6074279,rs6078132,rs112329508,rs17800232,rs6078136,rs1028440,rs6074281,rs13038948,rs13039061,rs34263258,rs6074283,rs6078138,rs6104738,rs11698064,rs6104739,rs6078140,rs1535071,rs1535072,rs144760488,rs13043539,rs6078141,rs2327402,rs28479511,rs28612819,20:11350094_TCA_…	15	9
20	10693337	rs2423514	3.50747e-09	83	3	20	7	9	44	.	15	9
6	35009578	rs2820224	3.70753e-12	390	10	157	73	36	114	rs3823438,rs3800426,rs1568705,rs2820230,rs13191889,rs820097,rs820096,rs820094,rs820092,rs820091,rs820089,rs820087,rs820086,rs820084,rs820081,rs820080,rs820079,rs820078,rs820076,rs820075,rs820074,rs865353,rs820073,rs707967,rs2140420,rs3001012,rs2820229,rs2762349,rs2762350	15	9
6	150984431	rs62434119	1.0467e-08	128	7	10	36	29	46	rs62434109,rs62434110,rs62434111,rs17080057,rs17080062,rs113397083,rs17080069,rs17080093,rs57139556,rs143799059,rs62434122,rs62434129,rs59155780	15	9
7	120920169	rs2952559	2.72811e-11	292	4	3	72	49	164	rs2110281,rs2110282,rs2110283,rs2968345,rs6956201,rs6466767,rs6961525,rs1917113,rs798933,rs798934,rs12673968,rs1554635,rs6466769,rs6954757,rs13223036,rs798943,rs566523025,rs2968338,rs1296405,rs13245677,rs798946,rs12673770,rs12706313,rs34320754,rs549829667,rs34249834,rs7801723,rs12706318,rs10953928,rs13232048,rs35758028,rs6947453,rs6952113,rs6951990,rs34770628,rs872007,rs872008,rs868053,rs884373,r…	15	9
7	120984041	rs2536185	1.15317e-08	201	130	22	4	11	34	rs2908004,rs2536189,rs2707466	15	9
7	99991548	rs7803454	1.57231e-08	318	27	23	70	10	188	rs7783550,rs11771419,rs11771241,rs10241492,rs11769886,rs35111986,rs6953749,rs76913697,7:100003055_GA_G,rs1000215,rs3900792,rs68116612,rs147130878,7:100009222_TG_T,rs73161762,rs111757992,rs7783159,rs67196635,rs10693652,rs11761725,rs2406255,rs7794485,rs11760536,rs113459328,rs67040465,rs6948699,rs60644673	15	9
8	120048305	rs1872422	2.86056e-10	438	42	65	24	58	249	rs1485307,8:120010406_GA_G,rs11995824,rs4424296,rs4335155,rs5894469,rs1905784,rs1905783,rs4354338,rs6469794,rs4273881,rs4355805,rs6469795,rs4336637,rs7838083,rs67819415,rs9650075,rs34264040,rs7013203,rs6469796,rs6469797,rs6469798,rs4397431,rs4424291,rs4495460,rs4495461,rs4327884,rs7822098,rs10955919,rs1905777,rs1905778,8:120022087_TA_T,rs76392809,rs4360322,rs4422806,rs1586273,rs6999463,rs7017691,…	15	9
1	167350323	rs10800308	1.26762e-09	178	19	15	78	31	35	rs2173298,rs10918666,rs10800293,rs10494474,rs1359059,rs4656538,rs11801381,rs4657654,rs10733051,rs7538951,rs10918683,rs11371298,rs7519945,rs4142888,rs7524664,rs11810672,rs2140761,rs7539298,rs2091248,rs12068341,rs2862131,rs6427086,rs7524019,rs12031685,rs36054165,rs4233416	16	9
11	10674044	rs4910165	1.70853e-10	147	40	20	6	2	79	rs6484437,rs2052692,rs4442541,rs7940646,rs4909945,rs10840457,rs2098839,rs1863243,rs1544861,rs7947953,rs903822,rs881869,rs1390571,rs903823,rs903824,rs1874443,rs1874445,rs12363520,rs1390575,rs1863245	16	9
16	87254373	rs62056161	9.19892e-09	165	0	5	45	29	86	rs12711472,rs12711473,rs9308341,rs9937293,rs4843227,rs4843560,rs4843226,rs4843559,rs4843558,rs9933149,rs56023709	16	9
2	65974661	rs770408932	6.14709e-09	105	21	9	5	13	57	rs11126057,rs3752663,rs79968190,rs3752664,rs7570841,rs2287282,rs2287283,rs142706617,rs7562708,rs2287286,rs6743531,rs56213130,rs12713548,rs6546175,rs6546176,rs2009778,rs2860911,rs7600385,rs10168499	16	9
20	10658882	rs6040076	3.82125e-11	78	1	2	5	14	56	rs2206815,rs2423510,20:10676849_CT_C,rs6032919,rs2057055,rs2057054,rs143403088,rs6040098,rs2423512,rs2179688,rs2143621,rs2143616,rs2143617,rs2179686,rs2327295,rs1883800,rs780355363,rs2327296,rs6032923,rs6032924,rs6032925,rs6032926,rs6032927,rs973542,rs6077888,rs2423514,rs6040102,rs1033517,rs68178883,rs6104651	16	9
3	190601149	rs56068001	5.30019e-11	172	0	1	45	7	119	rs61634624,rs35679428,rs13323015,rs9862175,rs6444469,rs9838279,rs9849583,rs1393060,rs771140446,rs749413636,rs6804748,rs2202100,rs13075101,rs6799249,rs13083648,rs28873531,rs34113929,rs6802105,rs1501600,rs866986,rs13070564,rs61500084,rs146550622,rs113180518,rs112522420,rs4624605,rs4308324,rs4308325,rs73193907,rs56234707,rs56268441,rs58531798,rs12727448,rs34886272,rs61494018,rs187620717,rs60386222,r…	16	9
3	190602087	rs9818981	3.55603e-09	72	4	1	0	1	66	rs9814367,rs34030983,rs13090681,rs9880346,rs9857963,rs13434373,rs72056004,rs9873268,rs62286348,rs62286349,rs76316471,rs9290958,rs9844152,rs9844338,rs62286352,rs9854712,rs13315587,rs34303823,rs28816787,rs9828756,rs9816578,rs9816886,rs9821167,rs9821075,rs9827488,rs9827516,rs9290959,rs9840870,rs9829689,rs28870076,rs9856237,rs9871399,rs9871595,rs35608805,rs34576065,rs9877058,3:190640157_AG_A,rs783628…	16	9
3	53017307	rs2564930	2.02013e-08	994	220	52	136	324	262	rs2710339,rs2581827,rs2710314,rs2710346,rs2439434,rs2465101,rs2581803,rs2710326,rs4515041,rs2336670,rs11399843,rs9823697,rs2245424,rs2336672,rs6801235,rs2581816,rs2581819,3:53016871_TA_T,rs1080500	16	9
7	19624489	rs574793622	3.38838e-15	383	4	28	4	18	329	rs4721778,rs4721779,rs4721780,rs4719564,rs4719565,rs10245919,rs12534570,rs12536555,rs2024347,rs2192486,rs4602789,rs1476944,rs759249,rs759248,rs10269875,rs917919,rs917918,rs917917,rs2192485,rs2192484,rs10230658,rs10244808,rs6963439,rs7794428,rs146273948,rs2192482,rs7789868,rs10276556,rs71017060,rs2390118,rs12700056,rs12700057,rs9648259,rs9648260,rs9648261,rs12700058,rs12535260,rs12532587,rs1270005…	16	9
7	120726926	rs2968349	2.64397e-08	381	52	25	21	85	198	rs13223036,rs798943,rs566523025,rs2968338,rs1296405,rs798946,rs12673770,rs12706313,rs12706318,rs10953928,rs13232048,rs35758028,rs6947453,rs6952113,rs6951990,rs884373,rs10234955,rs10261671,rs10258619,rs776700095,rs66871562	16	9
8	11260385	rs11782823	1.07794e-08	1700	411	269	404	341	275	rs6999270,rs10100187,rs1806283,rs4841526,rs4841527,rs34699199,rs11782893,rs201874260	16	9
1	12524652	rs12731666	5.01494e-12	38	4	10	10	8	6	rs3765339,rs4845898,rs35223089,rs12755560,rs71647039,rs12125606	17	7
11	44314372	rs12785603	1.00099e-10	87	1	7	10	14	55	rs10769035,rs10838255,rs11037946,rs4755809,rs66716358,rs12421995,rs3824915,rs7121535	17	7
16	87223723	rs111864226	1.97059e-12	165	3	5	8	29	120	16:87221841_ATG_A,rs9888792,rs12711472,rs12711473,rs9308341,rs9308342,rs9308343,rs9308344,rs9937293,rs4843227,rs4843560,rs4843226,rs4843559,rs4843558,rs4843557,rs7205039,rs9933149,rs12921714,rs12921347,rs12920553,rs12922411,rs12921170,rs4843556,rs7196520,rs7203251,rs56023709,rs6540016,rs7185688,rs11644651,rs7191546,rs6540017,rs11860417,rs4843555,rs12149643,rs4843554,rs4843553,rs4843552,rs8047567,…	17	7
17	43543083	rs7219532	4.02051e-14	2010	15	19	27	53	1896	rs62064594,rs62064595,rs61572747,rs79724577,rs4763,rs62064597,rs62064598,rs2028078,rs56220387,rs55793500,rs62064600,rs56236914,rs62064603,rs73984391,rs1808189,17:43485486_CA_C,rs62064637,rs36078910,rs35389313,rs35327136,rs8071011,rs62064641,rs62064643,rs34063617,rs12940792,rs12947718,rs369762169,rs71373560,rs34915103,rs12942951,rs35884427,rs12952504,rs34286926,rs56378631,rs12946723,rs12952764,rs3…	17	7
17	44204299	17:44204299_AC_A	1.30768e-12	1355	8	37	25	2	1283	rs62063291,rs62063292,rs62063293,rs62063294,rs17650973,rs62063295,rs17650991,rs75145092,rs113857334,rs17572147,rs77513497,17:44045574_AC_A,rs75691066,rs17572169,rs62063296,rs113925422,rs111164082,rs62641967,rs74373419,rs62063297,rs62063298,rs62063299,rs62063300,rs77566074,rs75856822,17:44048939_AG_A,rs62063301,rs62063302,rs62063303,rs75242405,rs17651093,rs17572248,rs62063304,rs62063305,rs17651134…	17	7
17	44826056	rs9896243	4.17882e-11	87	4	1	0	0	82	17:44734604_CAAGTGTA_C,17:44736722_CCCTT_C,rs199470,rs374952396,rs369332489,rs141783865,rs155755,rs199461,rs199441,rs199440,rs200403,rs199437,rs1378358,rs538628,rs183211,rs199436,rs169201,rs199438,rs199439,rs142167,rs199457,rs199456,rs199455,rs199454,rs199453,rs199452,rs199451,rs34162554,rs199449,rs199448,rs199447,rs199446,rs199445,rs199444,rs113562005,rs199443,rs199442,rs199536,rs111404933,rs199…	17	7
18	43094110	rs2852308	2.43827e-08	398	92	63	146	57	40	rs2852314,rs2193636,rs2852309	17	7
3	159607514	rs33056	3.88916e-08	243	107	74	24	3	35	.	17	7
6	126733094	rs59698523	3.00965e-09	401	59	20	13	17	292	rs6919397,rs79950493,rs17754780,rs6907898,rs139082274,rs9401876,rs2045258,rs9491624,rs2326387,6:126682068_AT_A,rs2027299,rs4895807,rs35536837,rs9388489,rs200587207,rs373980643,rs1361262,6:126707845_CT_C,rs1578060,rs575108619,rs9398805,rs35640641,rs4897178,rs4897179,rs4897180,rs576049,rs112166936,6:126740823_TTA_T,rs9321065,6:126744993_AATT_A,rs2039735,rs1538172,rs9401881,rs4565329,rs1538170,rs153…	17	7
7	120940436	rs2707521	2.48167e-16	368	1	2	3	13	349	rs3068006,rs1861001,rs2037632,rs66729951,rs12671188,rs798943,rs566523025,rs2968338,rs1296405,rs13245677,rs798946,rs12673770,rs12706313,rs34320754,rs549829667,rs34249834,rs7801723,rs12706318,rs10953928,rs13232048,rs35758028,rs6947453,rs6952113,rs6951990,rs34770628,rs872007,rs872008,rs868053,rs884373,rs10234955,rs10235232,rs10275439,rs10261671,rs10280039,rs13245690,rs35348547,rs10258619,rs1917110,r…	17	7
1	155126903	rs140676308	7.09055e-13	89	0	0	3	1	85	rs72702209,rs150352963,rs72702268,rs111455542,rs67579710,rs72704117,rs72704130,rs56894225,rs180921974,rs41314549,rs140959946,rs114760481,rs148015261,rs143612128,rs72704164,rs111360475,rs553470220,rs72704191,rs72704192,rs139932136,rs138522636,rs34172230	18	3
1	155661719	rs146554560	1.23619e-11	28	0	3	6	0	19	rs143582530,rs72706130,rs116237120,rs72706174,rs140893634,rs72706176,rs72706180,rs72706192,rs190301488,rs72708217,rs72708236,rs72708247,rs116480793	18	3
1	155197462	rs2990245	8.15265e-10	410	60	40	105	129	76	rs6676150,rs12743084,rs4072037,rs12411216,rs2974937,rs2066981,rs370545,rs914615,rs760077,rs2974935,rs2075570,rs2990223,rs28445596,rs2990220,rs497829,1:155194140_CAT_C,rs2049805,rs139558368,rs2974931,rs2974930,rs2974929	18	3
1	150948496	rs267735	5.79434e-09	614	110	16	16	62	410	rs3768018,rs1532770,rs10788794,rs10888391,rs11204722,1:150735580_TA_T,rs16827671,rs11204726,rs10888392,rs59337856,rs10888394,rs10888395,rs4319334,rs149447143,rs4509581,rs12085336,rs111905669,rs2864873,rs72704656,rs486836,rs1081512,rs12126004,rs72704679,rs35486314,rs2867297,rs6587542,rs4970932,rs11204749,rs2004903,rs3754211,rs6587551	18	3
1	47980916	rs6658111	3.47573e-08	305	237	9	21	36	2	.	18	3
12	106476805	rs12146713	6.08459e-17	128	12	85	12	0	19	rs3741884,rs17038091,rs1978730,rs12370774	18	3
12	93979419	rs11107117	3.65719e-09	90	9	1	33	18	29	rs7310389,rs7310512,rs3825199,rs3825198,rs11611927,rs747058684,rs11107116,rs10859535,rs10492321,rs35572626,rs7977788,rs11107119,rs11107120,rs35000205,rs9634212	18	3
15	58359787	rs3809535	1.32989e-11	326	3	1	5	12	305	rs28379349,rs7173078,rs8024164,rs4775005,rs1530293,rs143896067,rs920636,rs1550574,rs2218260,rs4775006,rs8033270,rs8025493,rs11852835,rs1579744,rs17820823,rs7178497,rs11071356,rs12909979,rs10851630,rs10851631,rs10851632,rs1441819,rs7495968,rs4646645,rs9325,rs1061278,rs1063666,rs3204690,rs3204689,rs4646642,rs4646640,rs2197092,rs3742961,rs3742960,rs12910113,rs4646638,rs3742959,rs11855259,rs3784264,r…	18	3
16	87231499	rs12149643	2.62238e-12	173	39	9	19	9	97	16:87221841_ATG_A,rs9888792,rs111864226,rs12711472,rs12711473,rs9308341,rs9308342,rs9308343,rs9308344,rs9937293,rs4843227,rs4843560,rs4843226,rs4843559,rs4843558,rs4843557,rs7205039,rs9933149,rs12921714,rs12921347,rs12920553,rs12922411,rs12921170,rs4843556,rs7196520,rs7203251,rs56023709,rs6540016,rs7185688,rs11644651,rs7191546,rs6540017,rs11860417,rs4843555,rs4843554,rs4843553,rs4843552,rs8047567…	18	3
16	86605453	rs67782872	2.88284e-08	114	44	22	20	14	14	rs67089055,rs67785750,rs55845372	18	3
19	39231981	rs62120083	6.43952e-12	314	7	25	102	42	138	rs2303040,rs13344413,rs12460849,rs979972,rs979971,rs55876653,rs56365761,rs10415219,rs1808382,rs16972767,rs3786835,rs62121814,19:39164393_ATT_A,rs62121816,rs62121818,19:39168010_AACAG_A,rs10406778,rs60687267,rs7252589,rs3786837,rs7254100,rs13343794,rs10415646,rs3786839,rs56113315,rs7251903,rs10421560,rs11083475,rs3786845,rs757940594,rs2287729,rs3745859,rs12462270,rs2279144,rs28488032,rs28624276,rs…	18	3
2	65987291	rs10168499	3.00241e-08	106	23	2	8	9	64	rs11126057,rs3752663,rs79968190,rs3752664,rs6546176,rs7600385	18	3
3	71580180	rs746573926	4.46318e-12	308	18	13	59	34	184	rs62246015,rs62246017,3:71492037_AT_A,rs55716899,rs17718444,rs11707890,rs17656627,rs17718640,3:71509380_CTTTG_C,rs76204832,rs62246055,rs13060421,rs11708920,rs11706279,rs13068294,rs35967223,rs57205040,rs35540156,3:71525563_CTCTT_C,rs17108,rs34264449,rs9836630,rs6549391,rs9828629,rs9853081,rs35483362,rs11715828,rs6805189,rs62247165,rs62247166,rs13327339,rs62247167,rs1876245,rs9878602,rs62247168,rs6…	18	3
4	88771611	rs9998343	2.22327e-09	558	16	110	115	123	194	rs1824699,rs4693901,rs12509080,rs12501353,rs12513086,rs28532955,rs28620206,rs4693902,rs4693903,rs12511140,rs12503426,rs12511124,rs10009251,rs4693904,rs12498148,rs12505719,rs4693905,rs4693906,rs4693907,rs4693908,rs6845452,rs6845644,4:88823114_CT_C,rs713538,rs713539,rs60486377,rs17783002,rs36088155,rs2869721,rs2869720,rs2869719,rs36060267,rs17783044,rs28684711,rs28630038,rs149456606,rs12502739,rs12…	18	3
5	122755352	rs34332857	2.18608e-17	605	46	3	119	47	390	rs426500,rs412742,rs406157,rs430148,rs382718,rs372212,rs383705,rs35890200,rs393761,rs432604,rs602648,rs412232,rs412584,rs391555,rs35043083,rs441446,rs412618,rs335158,rs10629804,rs335160,rs419771,rs335175,rs374621,rs182849,rs335173,rs335172,rs335171,rs233174,rs335169,rs233173,rs372478,rs408054,rs443382,rs335155,rs335154,rs335153,rs335152,rs335151,rs335150,rs335149,rs335148,rs394782,rs173028,rs6857…	18	3
5	122427635	5:122427635_GA_G	8.93187e-14	470	9	13	11	7	430	rs7709626,rs9327269,rs10041013,rs17382063,rs10035899,rs34243137,rs13164910,rs13165062,rs12516444,rs6866004,rs34199803,rs7725187,rs1031709,rs10463757,rs10050385,rs1460039,rs7731542,rs7713937,rs34978921,rs11744982,rs11741625,rs11748111,rs11743907,rs10478564,rs7720001,rs6885998,rs7735164,rs6873357,rs733723,rs2290856,rs7712027,rs7732716,rs7713082,rs7732878,rs7712966,rs7712970,rs1870557,rs4836199,rs99…	18	3
5	122502567	rs463106	1.2357e-11	212	121	7	33	3	48	rs335145,rs151283,5:122481429_AAT_A,rs10670773,rs459530,rs466970,rs459743,rs462210,rs58972771,rs162953,rs335214,rs335211,rs335210,rs335208,rs335207,rs335206,rs335205,rs335204,rs335201,rs335196	18	3
5	122007711	rs79626732	1.67782e-08	266	64	24	24	1	153	rs62377370,rs559875310	18	3
5	122850321	rs9327298	1.96023e-08	303	18	6	81	18	180	rs7703751,rs11745493,rs10054622,rs78154385,rs9327301,rs7705070,rs6875515,rs6595457,rs1004434,rs1002112,rs7737667,rs17475188,rs6887967	18	3
7	121018579	rs917727	7.66813e-26	154	66	6	9	2	71	rs12534075,rs10276111,rs10233441,rs112901683,rs17509082,rs2952556,rs7809135,rs10250475,rs6961083,rs7794940,rs7795061,rs7778200,rs10241888,rs2707521,rs71170242,rs10282303,rs34155977,rs1547960,rs1547959,rs6980043,rs6947246,rs35883000,rs6952851,rs10277699,rs2707520,rs10231005,rs76042375,rs2707518,rs10254825,rs2536201,rs2908008,rs10234624,rs2536196,rs2536195,rs62476338,rs2908007,rs10668066,rs3779381,…	18	3
7	120890803	rs373704952	1.1993e-10	125	14	4	5	14	88	rs75361007,rs75956426,rs79723118,rs116083706,rs35793694,rs77699599,rs10279122,rs80269068,rs13438127,rs10230310,rs77659599,rs543364349,rs80183787,rs79498775,rs10274324,rs10229198,rs10259598,rs79199805,rs78417395,rs57977421,rs798918,rs798917,rs798915,rs2691032,rs76272871,rs78204988,7:120908066_GC_G,rs798913,rs118025539,rs139552274,rs798909,rs798908,rs35133254,rs117555994	18	3
7	120908082	rs2536150	1.67965e-10	245	72	33	20	2	118	rs71569059,rs13247600	18	3
7	2823476	rs2644294	1.58624e-09	353	35	28	72	17	201	rs798526,rs798511,rs798510,rs798508,rs798502,rs798500,rs798498,rs798497,rs798496,rs798495,rs798494,rs798493,rs798491,rs798490,rs798489,rs33991430,rs798488,rs798487,rs798486,rs798485,rs71026552,rs11420712,rs1182208,rs1182207,rs35957220,rs771962135,rs13243214,rs7784066,rs2260230,rs2533884,rs2644312,rs2533882,rs960273,rs2533879,rs1182199,rs1182198,rs2158694,rs2107964,rs1636264,rs1713919,rs3837080,rs…	18	3
7	18913622	rs766604184	1.23037e-08	87	4	12	8	3	60	rs6461389,rs12536081,rs6461393,rs7794241	18	3
8	120060026	rs3082635	5.69679e-13	487	68	21	44	57	297	rs3103971,rs3134087,rs2101752,rs3103969,rs3103968,rs2326045,rs2035977,rs2055101,rs10955908,rs13250753,rs4407910,rs13439134,rs13277230,rs10101385,rs4355801,rs10112995,rs72680380,rs4876869,rs7010267,rs4319131,8:119947800_ACTTTC_A,rs1982763,8:119948046_AGAGG_A,rs3134054,rs11573885,rs1872426,rs6993910,rs1905786,rs3134056,rs6469788,rs3134057,rs3134058,rs1485289,8:119954477_GCC_G,rs10611942,rs7464496,r…	18	3
8	10788875	rs11783247	9.84569e-09	1770	287	225	257	308	693	rs6984496,rs10096511,rs11250101,rs11250102,rs10089518,rs2001433,rs17724467,rs6996846,rs4333549,rs6601564,rs10106207,8:11060217_TA_T,rs2409742,rs2409743,rs6601568,rs35499486,rs2409745,rs4512344,rs2409749,rs6601570,rs6999270,rs10100187,rs4841526,rs4841527,rs11782823,8:11268623_CA_C	18	3
8	8380471	rs7827182	2.96768e-08	1864	422	405	428	368	241	rs7826660,rs7009054,rs7823056,rs6995407	18	3
8	11440019	rs4841567	3.4913e-08	1467	144	238	513	211	361	rs35373084	18	3
1	155175089	rs72704117	1.09611e-12	92	0	0	1	3	88	rs72702209,rs72702268,rs140676308,rs35154152,rs67579710,rs72704130,rs180921974,rs41314549,rs140959946,rs114760481,rs148015261,rs143612128,rs72704164,rs111652370,rs111360475,rs113671475,rs72704175,rs553470220,rs72704191,rs72704192,rs139932136,rs138522636,rs34172230,rs567387639,rs143582530,rs72706118,rs146554560	19	6
1	155677255	rs72706130	5.74794e-11	39	1	8	3	9	18	rs116237120,rs72706174,rs140893634,rs72706176,rs72706180,rs72706192,rs190301488,rs72708217	19	6
10	25052042	rs4748977	2.27893e-10	242	7	35	56	9	135	rs10764492,rs6482420,rs6482421,rs6482422,rs7083008,rs7067766,10:25028364_CAA_C,rs7071605,rs7071609,rs6482424,rs1414456,rs7907931,rs1414457,rs1414458,rs1414459,rs7912395,rs7900706,rs6482425,rs6482426,rs6482427,rs6482429,rs6482430,rs796440162,rs4747494,rs4748970,rs7905360,rs7902525,10:25030783_GT_G,rs142961996,rs11445038,rs10828692,rs10828693,rs4511189,rs4332422,rs10828694,rs10828695,rs9943377,rs99…	19	6
12	20857467	rs10770705	4.82466e-09	105	5	1	1	3	95	12:20853022_CT_C,rs78458381,rs10743389,rs748849209,rs10743390,rs11392906,rs201855778,rs10770706,rs10505868,12:20859984_AT_A	19	6
14	54421917	rs2855530	4.83227e-10	56	0	4	18	9	25	rs2761882,rs762642,rs4898820,rs1957860,rs8014071	19	6
16	4489030	rs66717543	5.15887e-12	313	7	20	20	30	236	rs3747577,rs886858,rs4786485,rs8052826,rs7205650,rs11076826,rs9923395,rs4786486,rs12443618,rs758044,rs4786487,rs917304,rs917305,rs13338333,rs3747579,rs11076828,rs9923354,rs869481,rs4785960,rs4785961,rs9932461,rs3747580,rs3761679,rs7204624,rs11076830,rs7205189,rs11076831,rs9925719,rs3747581,rs934888,rs11647946,rs11648292,rs62039173,rs57674835,rs12447826,rs7204827,rs13335685,rs13339488,rs6500596,rs…	19	6
16	51446384	rs11641011	3.35957e-08	171	103	23	12	6	27	.	19	6
2	111609758	rs10180020	4.04921e-11	282	23	8	19	131	101	rs1969232,rs1969233,rs1533295,rs999643,rs999642,rs10180446,rs12476878,rs1554006,rs13019266,rs9917154,rs7576541,rs7588925,rs10179923,rs12711785,rs4849134,rs4849135,rs1533300,rs1533298,rs2612698,rs997523,rs2341873,rs10169852,rs2612700,rs4849155,rs4848317,rs35629884,rs2037040,rs10864930,rs1947964,rs12151764	19	6
21	34182226	rs12482132	4.50488e-11	347	47	10	102	63	125	rs2833951,rs2833952,rs9978685,rs9981011,rs761870800,rs7281662,rs7281035,rs7282022,rs13050853,rs2833955,rs2833956,rs796773534,rs4817501,rs2231391,rs2231390,rs1557264,21:34168293_TC_T,rs551508808,rs762228,rs72564613,rs5843567,rs13050778,rs6517108,rs2833958,rs2833959,rs2833960,rs1892578,rs13047936,rs1892579,rs9305511,rs9305512,rs9305513,rs2833961,rs10460707,rs4817502,rs963636,rs10664599,rs9974153,rs…	19	6
3	47095518	rs7625070	2.2961e-08	485	12	39	54	35	345	rs1869869,rs13066214,rs34344887,rs2305634,rs1079276,rs7625067,rs13091054,rs4683324	19	6
5	122744005	rs6862676	1.88279e-10	619	272	44	35	28	240	rs4308481,rs4836528,rs13156484,rs1582931,rs1428394,rs112446794,rs11241682,rs2407654,rs6887557,rs2407655,rs2407656,rs1962847,rs1962846,rs1019764,rs1019763,5:122677607_TGAG_T,rs12520233,rs1047440,rs1366334,rs7725869,rs6595438,rs6891155,rs4836532,rs2115172,rs2115173,rs748649855,rs7735212,rs5871040,rs569694187,rs28891214,rs75434608,rs11241689,rs762042055,rs34984032,rs397743989,rs3064335,rs34732995,rs…	19	6
7	2909225	rs1182151	4.562e-14	329	16	53	30	1	229	rs798565,rs798563,rs798562,rs798560,rs798559,rs798558,rs798557,rs798556,rs34802551,rs798555,rs798554,rs798552,rs798551,rs798550,rs798548,rs798547,7:2761349_CA_C,rs798546,rs798545,7:2762764_AAAG_A,rs798544,rs798540,rs78018097,rs798536,rs798528,rs798526,rs798518,rs798514,rs798511,rs798510,rs798508,rs798506,rs798502,rs798500,rs529794364,rs798498,rs798497,rs798496,rs798495,rs798494,rs798493,rs798491,…	19	6
7	18907930	rs12536081	1.37369e-08	87	0	0	1	6	80	rs6461389,rs12530943,rs12530969,rs6973029	19	6
9	114047460	rs10491879	3.11017e-15	100	0	1	2	7	90	rs78904498,rs75681206,rs2418144,rs79397945,rs10980833,rs77456864,rs700139,rs10980835,rs74636551,rs74706017,9:114009796_TAAC_T,rs10980836,rs10980837,rs12236912,rs79661213,rs17228272,9:114026291_TCTAA_T,rs10980839,rs10980840,rs10980841,rs11999864,rs12236081,rs10980847,rs72607186,rs55873644,rs4978988,rs536683688,rs76180976,rs78998026,rs4978437,rs10980865,rs72607187,rs57002023,rs10817168,rs78371528,r…	19	6
9	113649502	rs10817103	1.43963e-08	220	8	31	69	35	77	rs532803,rs1831036	19	6
1	47980916	rs6658111	6.29039e-39	305	0	0	0	17	288	rs61782708,rs6588196,rs149648316,1:47805707_TCCCTCCCCTC_T,rs12121831,rs12562561,rs55737131,1:47813750_TA_T,rs2820994,rs2622925,rs12127982,rs2820989,rs2622908,rs2820988,rs2622907,rs6588365,rs2622905,rs2246707,rs2820987,rs3122610,rs3125647,rs61784776,rs2622901,1:47835581_CT_C,1:47835699_GTC_G,rs34374399,rs55918644,rs56328227,rs12119783,rs56270164,rs6662814,rs6673934,rs55718554,rs2405922,rs4603175,r…	20	0
1	215139887	rs1452628	8.78356e-24	177	21	14	90	8	44	rs755576,rs6667184,rs12757359,rs10494987,rs6540873,rs2167688,rs476557,rs507072,rs1452630,rs10494988,rs4517324,rs1582113,rs7531398,rs76553563,rs12123237,rs145492984,rs78300504,rs11120457,rs17023977,rs76641944,rs1452631,rs59084003,rs12403837,rs12062933,rs12123258	20	0
1	215185552	rs2601645	9.26191e-13	193	59	51	6	42	35	rs12120334,rs7514200,rs76660218,rs12402694,rs6691805,rs12406318,rs12127113,rs2601647,rs2841614,rs6691229,rs1349671,rs748565506,rs112698436,rs199989108,rs965283,rs115948006,rs35551944,rs1597844,rs12402962,rs75718025	20	0
1	215159119	rs12079236	1.18967e-09	78	11	8	33	10	16	rs12073570,rs12078174,rs72760669	20	0
1	155173527	rs67579710	2.66185e-08	181	15	3	26	81	56	rs111508230,rs35154152	20	0
14	59665286	rs1252992	2.72633e-09	314	19	88	45	37	125	rs17833810,rs2349145,rs1957411,rs2099636,rs12887737,rs71111624,rs4898984	20	0
15	58358607	rs4646549	1.71456e-09	328	6	5	2	24	291	rs4646607,rs1899355,rs4646606,rs4646605,rs12595410,rs9635346,rs9635350,rs4646589,rs4646588,rs2642632,rs2642630,rs11629553,rs11629583,rs2899613,rs12914603,rs2704225,rs11071367,rs3809535,rs2464469,rs2464467,rs2464466,rs2642636,rs2704194,rs2453280,rs8031578,rs8030766,rs2704188,rs6493982,rs12916872	20	0
16	87231499	rs12149643	9.0001e-09	173	39	17	21	1	95	rs9308343,rs12920553,rs12921170,rs4843555,rs4843554,rs4843553,rs4843552,rs751969536,rs4240786,rs4843550,rs4843549,16:87255526_TCAC_T,rs12919133	20	0
17	7465339	rs11654859	1.72511e-08	330	48	2	20	75	185	rs11552708,rs62059826,rs10852891	20	0
18	19239632	rs3889669	3.42438e-08	441	33	89	53	49	217	18:19169807_CTTTT_C	20	0
21	34169318	rs5843567	3.11537e-08	346	63	78	56	36	113	rs2833958,rs2833959	20	0
22	21084669	rs5760217	1.201e-08	640	120	41	115	69	295	rs853295,rs6004026,rs4361213,rs2002524,rs2002525,rs2010990,rs5760287,rs201073843,rs738058,rs6004133,rs2072516,rs2192802,rs6004161,rs4822496,rs4820591,rs5760442,rs165848,rs178029,rs165780,rs178042,rs361556,rs361979,rs147012496,rs165718,rs165844,rs165799,rs165729,rs165753,rs165595,22:21194119_CA_C,rs165594,rs165750,22:21200551_CAA_C,rs165759,rs165850,rs178065,rs178067,rs178068,rs165605,rs1061063,rs…	20	0
3	194478688	rs4234201	2.47334e-12	180	29	39	26	26	60	rs6437412,rs10933668,rs6777925,rs7627816,rs4677637,rs4393849,rs4361226,rs10933671,rs4677742,rs4677743,rs6798915,rs4677744,rs6437417	20	0
3	170336641	rs34528983	2.22715e-08	86	15	3	13	27	28	rs111687900,rs57842203,rs757326073,rs17826561,rs6764983	20	0
3	73714140	rs1355467	4.51279e-08	428	122	51	65	102	88	.	20	0
4	41328561	rs11936070	2.75483e-08	222	61	43	49	44	25	.	20	0
5	122714972	rs3990341	3.3131e-08	591	153	27	152	60	199	rs17150388,rs17150389	20	0
6	35009196	rs3800426	1.18034e-13	391	19	48	102	50	172	rs2064254,rs3734263,rs3734262,rs2985,rs4646944,rs4646940,rs11377156,rs2273006,rs4646923,6:34853091_CT_C,rs1555107,rs13218101,rs202082381,rs3756857,rs9368834,rs9394252,rs13219624,rs9394253,rs9357186,rs73421513,rs7739991,rs12176092,rs6907619,rs6918183,rs6918872,rs12175621,rs9366873,rs6905468,rs9296139,rs16895362,rs3800451,rs16895467,rs3800449,rs2092428,rs9394257,rs12173920,rs7757211,rs9357188,rs936…	20	0
6	34840440	rs3734260	6.68559e-09	656	13	36	9	200	398	rs9366871,rs3756858,rs2273007,rs9348952,rs59493795,6:34871046_TTTGA_T,rs9380472,6:34943530_CA_C	20	0
7	151498679	rs4128399	6.3563e-27	12	0	0	0	1	11	rs34802637,rs4726099,rs56158745,rs4726100,rs62478243,rs13224758,rs12703159,rs56729506	20	0
1	215152832	rs76641944	1.20106e-09	211	126	22	23	5	35	rs7531398,rs12123237,rs78300504,rs17023977,rs59084003,rs12403837	21	4
1	155004880	rs72702251	1.16658e-08	87	3	0	1	43	40	rs150352963	21	4
10	25060887	rs6482443	6.30029e-10	240	30	33	47	17	113	rs10764492,rs6482420,rs6482421,rs6482422,rs7083008,rs7067766,10:25028364_CAA_C,rs7071605,rs7071609,rs6482424,rs1414456,rs7907931,rs1414457,rs1414458,rs1414459,rs7912395,rs7900706,rs6482429,rs6482430,rs796440162,rs4747494,rs4748970,rs7905360,rs7902525,rs142961996,rs11445038,rs10828692,rs10828693,rs4511189,rs4332422,rs10828694,rs10828695,rs9943377,rs9943389,rs9943380,rs7068753,rs9943341,rs4436453,r…	21	4
11	110945939	rs321348	4.31562e-12	275	11	25	53	25	161	rs11418777,rs321350,rs73015136,rs321403,rs321404,rs7941114,rs321406,rs11213729,rs68122012,rs1878536,rs1878537,rs7924641,rs12275746,rs12276034,rs321414,rs321416,rs321418,rs321422,rs7123402,rs574760,rs167684,rs484021,rs7112075,rs559757,rs560503,rs514347,rs565152,rs539009,rs516177,rs17459717,rs494921,rs580656,rs536679,rs502584,rs511835,rs534858,rs536579,rs576877,rs1900556,rs7926634,rs7940380,rs15175…	21	4
11	111025039	rs34077344	4.95014e-11	35	6	7	7	5	10	rs61900578	21	4
11	27330187	rs137960711	3.84776e-09	337	24	56	61	34	162	rs7929461,rs10835149,rs7484147,rs7481148,rs7115024,rs7115157,rs28416407,11:27308403_GT_G,rs10450586,rs10450587,rs10450588,rs10450589,rs10767627,rs899302,rs899303,rs10450561,rs10450562,rs10450590,rs10767628,rs10835152,rs11029915,rs11029916,rs10835153,rs10767630,rs10742172,rs35855581,rs10835154,rs10767631,rs7483162,rs7480595,rs7951015,rs6484288,rs6484289,rs10835155,rs10767632,rs10082611,rs10082678,…	21	4
11	130282078	rs2875238	3.08034e-08	67	22	7	10	3	25	.	21	4
12	106476805	rs12146713	4.14736e-38	128	0	0	0	1	127	rs73192197,rs11112850,rs12369969,rs73193824,rs1427793,rs1064959,rs3741884,rs3782690,rs17038091,rs1978730,rs73193841,rs1896364,rs7485023,rs10778458,rs11112866,rs73193855,rs112312971,rs55657928,rs3782692,rs12370774	21	4
13	50811916	rs1326127	9.65511e-09	217	42	25	33	45	72	rs769656666,13:50806063_AAACAAC_A,rs2765767,rs2580190,rs2812196,rs2066660	21	4
15	85693016	rs2342118	2.57676e-11	738	41	95	92	205	305	rs896364,rs12439802,rs7173332,rs62022525,rs12900078,rs116893322,rs34585903,rs796672389,rs67613323,rs11629962,rs11629963,rs71397835,rs62022527,rs62022528,rs11629967,rs17611171,rs12908400,rs12912860,rs12902942,rs12909971,rs12900012,rs12909130,rs141678143,rs28887294,rs11632899,rs72757059,rs12909111,rs11632658,rs11630697,rs11634975,rs4980357,rs4980356,rs11634877,rs11632175,rs34743976,rs62019482,rs116…	21	4
16	87225473	rs4843558	7.84898e-41	170	0	0	1	0	169	rs13331098,rs13331147,rs13335937,rs11647669,rs4843221,rs12934042,rs4843223,rs11641115,rs66506946,rs11865818,16:87216713_ATGCAGTATATGGC_A,rs9922143,rs56399712,rs9783773,rs11863620,rs9783786,rs62042578,rs11864957,rs12447701,rs11864791,rs11861940,rs11861033,16:87221841_ATG_A,rs9888792,rs111864226,rs12711472,rs12711473,rs9308341,rs9308342,rs9308343,rs9308344,rs9937293,rs4843227,rs4843560,rs4843226,rs…	21	4
16	87177837	rs4843536	2.8838e-10	5	1	0	0	1	3	.	21	4
16	87204587	rs11647130	4.63214e-09	32	18	4	1	0	9	rs11640818	21	4
16	87167321	rs79642548	3.53097e-08	64	0	1	3	6	54	.	21	4
16	87482330	rs7200800	4.48096e-08	123	43	40	19	3	18	.	21	4
2	56135497	rs4233964	5.25649e-12	246	76	11	60	60	39	2:56116193_TTGATTCTTGGCCTCCCTCCC_T,2:56127099_AT_A,rs7596872,rs78857879,rs3762515,rs113481311,rs146896516	21	4
3	194478411	rs4393849	3.72064e-08	179	58	10	85	7	19	rs6777925,rs4234201	21	4
5	122755562	rs7706662	3.87738e-11	644	116	82	163	69	214	rs4308481,rs4836528,rs13156484,rs1582931,rs12520233,rs1047440,rs7725869,rs6595438,rs6891155,rs2115172,rs2115173,rs748649855,rs7735212,rs11241689,rs34984032,rs397743989,rs34732995,rs2407778,rs1428389,rs17408002,rs17150385,rs6887350,5:122713839_TA_T,rs9942363,rs142849434,rs34720256,5:122717461_AT_A,rs11950066,rs6595440,rs13153729,rs761221355,rs13176035,rs13159477,rs13181772,rs61604748,rs13154717,rs…	21	4
7	2760935	rs798548	2.15413e-18	351	8	11	19	48	265	rs798565,rs798563,rs798562,rs1184662,rs798561,rs798560,rs798559,rs798558,rs798557,rs798556,rs34802551,rs798555,rs798554,rs798552,rs798551,rs798550,rs798547,7:2761349_CA_C,rs798546,rs798545,7:2762764_AAAG_A,rs798544,rs798540,rs78018097,rs798536,rs709282,rs798531,rs798528,rs798526,rs798518,rs798514,rs798513,rs798512,rs798511,rs798510,rs798508,rs798506,rs798503,rs798502,rs798500,rs529794364,rs798499…	21	4
7	120965464	rs10668066	1.07208e-16	168	14	5	49	30	70	rs12534075,rs10276111,rs10233441,rs112901683,rs2952556,rs7809135,rs10250475,rs6961083,rs7794940,rs7795061,rs7778200,rs10241888,rs2707521,rs71170242,rs10282303,rs34155977,rs1547960,rs1547959,rs6980043,rs6947246,rs35883000,rs6952851,rs10277699,rs10231005,rs76042375,rs2707518,rs10254825,rs2536201,rs10234624,rs2536196,rs2536195,rs62476338,rs2908007,rs3779381,rs2908004,rs142005327,rs2536189,rs3801387,…	21	4
7	134382330	rs4728335	1.03129e-10	182	44	3	5	4	126	rs34845444,rs4524734,rs10954464,rs11762352,rs2347696,rs2347697,rs2347698,rs6973339,rs6467551,rs6944563	21	4
1	215145495	rs145492984	6.95293e-09	198	17	12	44	25	100	rs7531398,rs12123237,rs17023977,rs12123258,rs544535,rs12119060,rs2601647,rs2601645,rs2841614,rs6691229,rs748565506,rs112698436,rs199989108,rs965283,rs1597844,rs76164928	22	3
11	44351822	rs35381390	8.45733e-09	28	3	5	12	5	3	.	22	3
16	87230224	rs7191546	4.30926e-09	164	41	12	13	7	91	rs9888792,rs111864226,rs12711472,rs12711473,rs9308341,rs9308342,rs9308343,rs9308344,rs9937293,rs4843227,rs4843560,rs4843226,rs4843559,rs4843558,rs4843557,rs7205039,rs9933149,rs12921714,rs12921347,rs12922411,rs4843556,rs7196520,rs7203251,rs56023709,rs6540016,rs7185688,rs11644651,rs6540017,rs12149643,rs4843554,rs4843553,rs8047567,rs12711474,rs4240788,rs8055080,rs55807115,rs4843548,rs4843547	22	3
7	121033121	rs7776725	5.49113e-09	158	84	6	3	27	38	rs3801387,rs55963900,rs10242100,rs3801383,rs3801382,rs7807953,rs7808155,rs12539772,rs56364616,rs917727,rs917726,rs718766	22	3
8	9083416	rs2929456	1.45837e-09	1841	238	232	332	314	725	rs4841029,rs2929455,rs2929309,rs2929454,rs2929308,rs2929453,rs2929452,rs2929306,rs200829259,rs386722044,rs2929305,rs767581568,rs2929451,8:9085712_TCA_T,rs330047,8:9087248_GAC_G,rs330048,rs330049,rs330050,rs330054,8:9088459_TA_T,8:9088524_GA_G,8:9088790_TC_T,rs330056,rs330057,rs330058,rs330060,rs330037,rs9329200,rs10092882,rs10100706,rs1380104,8:9323026_GA_G,rs6997920,rs7833937,rs6601317,8:9330433…	22	3
8	10255181	rs13254263	3.02117e-08	1581	318	225	372	279	387	rs7831557	22	3
8	108940264	rs534702	3.18058e-08	420	181	13	43	14	169	rs622634,rs557606,rs2047197,rs1098815,rs593872,rs498232,rs676613,rs503575	22	3
8	11263622	rs4546618	3.83377e-08	1590	131	144	294	467	554	rs7350091	22	3
1	215141570	rs10494988	3.17628e-26	176	1	1	2	9	163	rs1077323,rs755576,rs1452626,rs1452627,rs6667184,rs12757359,rs1901620,rs1901621,rs10494987,rs17023910,rs12728280,rs6540873,rs2167688,rs562410,rs1452628,rs476557,rs1349673,rs507072,rs1452630,rs4517324,rs487208,rs1582113,rs7531398,rs76553563,rs12123237,rs145492984,rs1890007,rs78300504,rs864736,rs2077982,rs17023977,rs543029,rs76641944,rs1452631,rs495296,rs1452632,rs59084003,rs6681013,rs12403837,rs12…	23	4
1	215185552	rs2601645	1.99078e-10	193	10	25	65	55	38	rs12120334,rs7514200,rs76660218,rs12402694,rs6691805,rs12406318,rs12134208,rs2601647,rs2841614,rs6691229,rs1349671,rs748565506,rs112698436,rs965283,rs115948006,rs12402962,rs75718025,rs111593735	23	4
1	93270673	rs1610320	2.43033e-08	632	157	6	83	376	10	.	23	4
11	130279168	rs7936928	4.67804e-08	77	42	9	10	7	9	.	23	4
12	28277338	rs1351266	1.62973e-11	720	189	17	17	30	467	rs79826613,rs2054474,rs75547058,rs144396101,rs17575785,rs17603585,rs59084530,rs78804134,rs10459088,rs10459089,rs7316732,rs1904387,rs1993936,rs2127316,rs7971974,rs35247497,rs7305790,rs12229872,rs11049364,rs11049365,rs11049368,rs16932640,rs7977538,rs1965280,rs1463571,rs2881787,rs4931727,rs4931729,rs4931730,rs11049373,rs35230625,rs10843115,rs2127315,rs35787832,rs11049380,12:28317157_AAT_A,rs2035271,…	23	4
14	53928574	rs17126544	3.35048e-08	164	90	9	7	2	56	rs56321994,rs1954309	23	4
18	60903629	18:60903629_CA_C	6.63484e-14	31	0	0	3	8	20	rs7243091,rs12957119,rs71162605,rs12967026,rs113421548,rs71162607,rs12964435,rs71353381,rs12970504,rs6567331,rs11877925,rs7242542,rs4987768,rs17070848,rs11152374,rs11663275,rs12970840,rs12961976	23	4
18	42435226	rs661251	5.02856e-10	119	25	40	12	7	35	rs28600969,rs12965289,rs35857171,rs687971,rs665997,rs644286,rs622759,rs626498,rs661638,rs678726,rs654269	23	4
3	190665495	3:190665495_GTT_G	2.16312e-29	172	1	0	0	0	171	rs61634624,rs10937448,rs9868955,rs35679428,rs13069739,rs13089859,rs17518905,rs6779631,rs6766815,rs13096714,rs9880320,rs9842242,rs9842514,rs527926374,rs9819764,rs13323015,rs9862175,rs9825567,rs6444469,rs4377528,rs56068001,rs9838279,rs9290957,rs6780160,rs9849583,rs1393059,rs1393060,rs1393061,rs771140446,rs749413636,rs6804748,rs1846953,rs2202100,rs1393048,rs13075101,rs6799249,rs13083648,rs28873531,r…	23	4
3	190602087	rs9818981	1.20271e-11	73	0	0	0	5	68	rs13079050,rs9814367,rs34030983,rs13090681,rs9880346,rs13322873,rs9857963,rs538135044,rs13434373,rs72056004,rs9873268,rs62286348,rs62286349,rs76316471,rs9290958,rs9844152,rs9844338,rs62286352,rs9854712,rs13315587,rs34303823,rs28816787,rs9828756,rs9816578,rs9816886,rs9821167,rs9821075,rs9827488,rs9827516,rs62288073,rs9290959,rs9840870,rs9829689,rs9867760,rs28870076,rs9856237,rs9871399,rs9871595,rs…	23	4
3	132410214	rs2271490	7.32649e-10	303	7	19	9	17	251	rs75537912,rs62291485,rs62291486,rs62291488,rs3804636,rs11926081,rs150273563,rs62291499,rs62291501,rs41272321,rs62291503,rs62291504,rs2305626,rs17413620,rs149406042,rs62291553,rs62291556,rs11926381,rs62291558,rs17348055,rs9637394,rs62292460,rs62292461,rs10935027,rs3046203,rs62292465,rs11925495,rs62292467,rs62292469,rs2271491,rs62292471,rs62292473,rs17414558,rs572076167,rs62292475,rs11923081,rs801…	23	4
6	35009578	rs2820224	7.61621e-15	390	25	27	12	7	319	rs2064254,rs58737173,rs11758962,rs9469918,6:34922921_CT_C,rs3823438,rs13207848,rs3800426,rs1568705,rs2820230,rs13191889,rs820097,rs820096,rs820095,rs820094,rs820092,rs820091,rs820089,rs820087,rs820086,rs820084,rs820081,rs820080,rs820079,rs820078,rs820076,rs820075,rs820074,rs865353,rs820073,rs820072,rs820101,rs707967,rs66753029,rs2689097,rs2762342,rs113779801,rs2140420,6:35064812_ATT_A,rs72897804,…	23	4
7	19611753	rs10807794	2.17519e-13	380	12	22	59	2	285	rs4721778,rs4721779,rs4721780,rs4719564,rs4719565,rs10245919,rs12534570,rs12536555,rs2024347,rs2192486,rs4602789,rs1476944,rs759249,rs759248,rs10269875,rs917919,rs917918,rs917917,rs2192485,rs2192484,rs10230658,rs10244808,rs6963439,rs7794428,rs146273948,rs2192482,rs7789868,rs10276556,rs71017060,rs2390118,rs12700056,rs12700057,rs9648259,rs9648260,rs9648261,rs12700058,rs12535260,rs12532587,rs1270005…	23	4
7	102610797	rs12671803	1.83728e-09	594	58	62	149	111	214	rs9641299,rs77490360,rs10464611,rs11974748,rs4489255,rs4361704,rs149805825,rs12672488,rs9691949,rs199970642,rs9718444,rs56356294,7:102433003_AG_A,rs74708264,rs142264290,rs2908412,rs3933460,rs7779145,rs7804322,rs6967389,rs12666764,rs2411056,rs60524601,7:102493317_GAA_G,rs56894117,rs6945369,rs140064303,rs143740918,rs181753416,rs57350619,rs58680618,rs57776797,rs9690210,rs60599650,rs3779029,rs6976005…	23	4
1	215139887	rs1452628	7.82777e-09	177	126	12	16	10	13	rs6540873,rs10494988,rs76641944,rs59084003	24	4
11	27528987	rs3763965	1.00833e-09	381	46	80	64	74	117	11:27459318_GCAGGAGGACCTC_G,rs5020127,rs11030009,rs10835180,rs5790651,rs7946359,rs11030011,rs7945211,rs772938146,rs10835187,rs11030027,rs11030032,rs7104230,rs3209593,rs1140711,rs11378974,rs10767644,rs11030036,rs12362567,rs751185443,rs10835189,rs11030042,rs11030045,rs4528277,rs11603350,rs901926,rs1304101,11:27603644_TA_T,rs10767652	24	4
14	75662679	rs754892634	3.43687e-09	533	6	2	86	95	344	rs175012,rs175015,rs175034,rs175039,rs175042,rs175043,rs175044,rs768948375,rs175045,rs175048,rs108621,rs175049,rs108622,rs199630987,rs398896,rs424120,rs5809691,rs35881732,rs175055,rs175059,rs2098251,rs2098252,rs175064,rs175065,rs28687415,rs175068,rs175071,rs175072,rs175074,rs175077,rs175078,rs175080,rs175084,rs175502,rs4903278,rs175499,rs175496,rs175494,rs175492,rs175490,14:75552890_AAAAAAT_A,rs1…	24	4
16	87221841	16:87221841_ATG_A	3.43325e-13	168	21	1	12	23	111	rs9888792,rs111864226,rs12711472,rs12711473,rs9308341,rs9308342,rs9308343,rs9308344,rs9937293,rs4843227,rs4843560,rs4843226,rs4843559,rs4843558,rs4843557,rs7205039,rs9933149,rs12921714,rs12921347,rs12920553,rs12922411,rs12921170,rs4843556,rs7196520,rs7203251,rs56023709,rs6540016,rs7185688,rs11644651,rs7191546,rs6540017,rs4843555,rs12149643,rs4843554,rs4843553,rs4843552,rs8047567,rs12711474,rs7748…	24	4
17	44126765	rs113434679	3.06483e-11	3108	32	11	19	19	3027	rs62064364,rs2668673,rs769375,rs2668677,rs2942189,rs2668679,rs1971374,rs2668680,rs1813014,rs1624697,rs2693359,rs1724430,rs62064388,rs530808688,rs1724390,rs62064391,rs111390638,rs62064393,rs62064394,rs2458198,rs1724397,rs1724398,rs1724399,rs62064395,rs796568985,rs2950009,rs2950010,rs2950011,rs62064409,rs112010353,rs2693349,rs2469938,rs2696425,rs2950012,rs796069077,rs62064415,rs62064416,rs62064417,…
rs2532330	rs2532329	rs2696546	rs2668617	rs2732708	rs2696542	rs2732706	rs2732705	rs2668622	17:44352149_CTTTT_C	rs2668623	rs2696537	17:44352633_GT_G
17	43574611	rs62065457	3.42887e-10	255	13	24	6	18	194	rs4763,rs62064597,rs55793500,rs62064600,rs56236914,rs62064603,rs73984391,17:43485486_CA_C,rs62064637,rs36078910,rs35389313,rs35327136,rs8071011,rs62064641,rs62064643,rs34063617,rs12940792,rs12947718,rs71373560,rs34915103,rs12942951,rs35884427,rs12952504,rs34286926,rs56378631,rs12946723,rs12952764,rs35420583,rs34792542,rs35519908,rs12942666,rs62064645,rs62064646,rs62064647,rs7222389,rs55648326,rs5…	24	4
17	44734604	17:44734604_CAAGTGTA_C	3.45179e-09	87	5	0	1	1	80	17:44736722_CCCTT_C,rs141783865,rs155755,rs199441,rs199440,rs169201,rs199439,rs199457,rs199451,rs199443,rs199535,rs9896243,rs199525,rs199501,rs916888	24	4
18	60894307	rs12964435	1.3036e-08	31	0	8	3	2	18	rs71162607,rs71353381,rs12970504,rs7242542,18:60903629_CA_C,rs17070848	24	4
3	190670977	rs56396731	1.99887e-15	172	0	0	1	26	145	rs35679428,rs13323015,rs9862175,rs6444469,rs56068001,rs9838279,rs9849583,rs1393060,rs771140446,rs749413636,rs6804748,rs2202100,rs13075101,rs6799249,rs13083648,rs28873531,rs34113929,rs6802105,rs1501600,rs866986,rs13070564,rs61500084,rs146550622,rs113180518,rs112522420,rs4624605,rs4308324,rs4308325,rs73193907,rs56234707,rs12497975,rs56268441,rs58531798,rs12727448,rs34886272,rs61494018,rs187620717,r…	24	4
3	66434643	rs2306272	1.11798e-08	200	81	5	33	49	32	.	24	4
6	35009578	rs2820224	1.99998e-09	390	193	21	35	51	90	rs3800426,rs1568705,rs2820230,rs13191889	24	4
7	151498679	rs4128399	4.01683e-09	12	1	1	2	1	7	rs13224758	24	4
1	215139887	rs1452628	8.20323e-29	177	1	1	14	11	150	rs1077323,rs755576,rs1452626,rs1452627,rs6667184,rs12757359,rs1901620,rs1901621,rs10494987,rs17023910,rs12728280,rs6540873,rs2167688,rs562410,rs476557,rs1349673,rs507072,rs1452630,rs10494988,rs4517324,rs487208,rs1582113,rs7531398,rs76553563,rs12123237,rs145492984,rs1890007,rs78300504,rs864736,rs2077982,rs17023977,rs543029,rs76641944,rs1452631,rs495296,rs1452632,rs59084003,rs6681013,rs12403837,rs1…	25	0
1	215185552	rs2601645	9.02683e-15	193	17	13	34	63	66	rs12120334,rs7514200,rs76660218,rs12402694,rs6691805,rs12406318,rs12127113,rs12134208,rs2601647,rs2841614,rs6691229,rs1349671,rs748565506,rs112698436,rs965283,rs115948006,rs35551944,rs1597844,rs12402962,rs75718025,rs75277616	25	0
1	155172725	rs35154152	1.06583e-10	180	24	3	4	5	144	rs1462854,rs67333363,rs57157364,rs58925616,rs12126992,rs72702285,rs72702288,rs113932675,rs7517158,rs7517162,rs7548383,rs72702293,rs112591935,rs7365736,rs111993576,rs11264324,rs28670060,rs11264325,rs10908457,1:155091121_AAG_A,rs11264326,rs12081692,rs113314132,rs113461732,rs13375955,rs111455542,rs73001391,rs11264331,rs66474937,1:155102013_ACACACACACACGCACACCCT_A,rs4390169,rs4745,rs548050053,rs56634…	25	0
1	47980916	rs6658111	2.09479e-10	305	72	92	73	44	24	rs61784835	25	0
1	207928635	rs2724382	1.07311e-09	394	8	42	129	80	135	rs7550273,rs2761430,rs2796258,rs2796259,rs2796262,rs2796263,rs1830764,rs2761433,rs2761435,rs2761436,rs2796264,rs2796266,rs1970530,rs2796268,rs2724383,rs2724385,rs2724386,rs2724387,rs11370836,rs2724388,rs2724389,rs2724359,rs2796270,rs2488252,rs2488253,rs2466571,rs2488254,rs2488255,rs2796271,rs10746399,rs2796273,rs2724361,rs2796274,rs2488256,rs2488257,rs2724370,rs3109808,rs2724381,rs2724380,rs27962…	25	0
1	155071588	rs57742792	1.42992e-08	241	33	18	42	7	141	rs7365544,rs56112907,rs10796938,rs6427158,rs11264312,rs4625273,rs7366355,rs11264314,rs7368345,1:155081237_TCCTCCCTC_T,rs6693477,rs11581730,rs7548955,rs7546746,rs11264318,rs11264319,rs11583762	25	0
1	150714360	1:150714360_AG_A	2.84936e-08	544	45	18	8	13	460	.	25	0
10	50315893	rs13088	2.04913e-11	399	70	37	6	20	266	rs11814277,rs61848153,rs2377692,rs11816318,rs11817325,rs2943252,rs61850678,rs12780892,rs2250349,rs61850681,rs2250257,rs2943253,rs61850682,10:50252571_GA_G,rs147859673,rs61850683,rs61850684,rs17011692,rs2246463,rs28505677,rs17011715,rs56157539,rs61850689,rs4272720,rs61850690,rs6537493,rs17011726,rs4264085,rs4453139,rs36116147,rs7897289,rs61850693,rs4128908,rs7906722,rs7916825,rs56027486,rs61848370…	25	0
11	44314372	rs12785603	1.32347e-09	87	6	18	12	0	51	rs11037927,rs10769035,rs10838255,rs11037946,rs4755809	25	0
12	28139312	rs33083	2.38182e-08	188	57	18	96	0	17	.	25	0
14	54420647	rs71446481	1.71177e-10	56	0	0	0	8	48	rs4444235,rs7159662,rs11157993,rs2358432,rs11623717,rs12893484,rs12898159,rs17563,rs2071047,rs2855532,rs2761882,rs2761884,rs2855530,rs2738265,rs762643,rs2761887,rs2032423,rs8014363	25	0
15	85706294	rs7179511	7.58068e-10	772	61	178	260	127	146	rs72757059,rs4980356,rs4842863,rs8037886,rs12909477,rs2342118,rs4843021,rs8042888,rs8023774,15:85703346_ATTTTTT_A,rs6496771,rs4843024,rs6496775,rs7172266,rs2342124,rs3964197,rs8039368	25	0
15	58286989	rs1899355	2.56499e-09	332	13	3	8	41	267	rs4646614,rs8041644,rs57975858,rs12324197,rs1441815,rs4646607,rs4646606,rs4646605,rs12595410,rs9635346,rs9635350,rs34133263,rs2642632,rs2642630,rs34676542,rs12914414,rs2704197,rs2704196,rs11629553,rs11629583,rs2067062,rs4646570,rs2899613,rs12914603,rs2704225,rs11071367,rs4646557,rs4646549,rs3809535	25	0
16	87231499	rs12149643	4.2419e-12	173	21	8	38	16	90	16:87221841_ATG_A,rs12711472,rs12711473,rs9308341,rs9308343,rs9937293,rs4843227,rs4843560,rs4843226,rs4843559,rs4843558,rs9933149,rs12920553,rs12921170,rs56023709,rs11644651,rs7191546,rs6540017,rs11860417,rs4843555,rs4843554,rs4843553,rs4843552,rs774875854,rs4240792,rs4240791,rs4240790,rs4240789,rs751969536,rs4240787,rs4240786,rs4843550,rs4843549,rs28655023,rs62056161,16:87255526_TCAC_T,rs12919133	25	0
17	75406045	rs312853	2.70168e-10	126	10	22	16	4	74	rs2898646,rs747147,rs892961,rs2411110,rs312857,rs1110638,rs11077907,rs1075457,rs4386185,rs2164449,rs2117924,rs312856,rs11653743,rs2411111,rs2411112,rs2898647,rs61010755,rs11077909,rs7216116,rs7216155,rs7216909,rs34148977,rs11657961,rs11657725,rs34691085,rs12452788,rs2574840,rs55661113,17:75408957_CT_C,rs9916143,rs10644702,rs7223768,rs11658267,rs747483,rs747482,rs747481,rs749461689,rs35489990,rs11…	25	0
19	39242559	rs55873140	6.62505e-14	328	3	36	61	18	210	rs2303040,rs10424568,rs13344413,rs12460849,rs979972,rs979971,rs55876653,rs56365761,rs10415219,rs1808382,rs16972767,rs3786835,rs62121814,rs28377909,rs11670636,19:39164393_ATT_A,rs62121816,rs755690,rs62121818,19:39168010_AACAG_A,rs10406778,rs60687267,rs7252589,rs3786837,rs7254100,rs13343794,rs11083473,rs10415646,rs3786839,rs56113315,rs7251903,rs10421560,rs10426809,rs11083475,rs749701,rs3786845,rs75…	25	0
21	34170535	rs13050778	1.14341e-11	348	34	46	108	55	105	rs9978685,rs9981011,rs761870800,rs7281662,rs7281035,rs7282022,rs13050853,rs2833955,rs2833956,rs796773534,rs4817501,rs2231391,rs2231390,rs1557264,21:34168293_TC_T,rs551508808,rs762228,rs72564613,rs5843567,rs6517108,rs2833958,rs2833959,rs2833960,rs1892578,rs13047936,rs1892579,rs9305511,rs9305512,rs9305513,rs2833961,rs10460707,rs4817502,rs963636,rs10664599,rs9974153,rs1034316,rs2000431,rs2000432,rs1…	25	0
21	47412524	rs760439	2.79088e-08	257	7	13	66	60	111	rs11702175,rs75434097	25	0
22	21022869	rs4822429	3.12987e-10	652	168	6	13	79	386	rs2110412,rs4820558,rs488506,rs490365,rs520698,rs9608279,rs552668,rs499113,rs583208,rs598141,rs565979,rs479275,rs511527,rs542771,22:21031583_GT_G,rs672235,rs491228,rs853148,rs591446,rs637335,rs639715,rs670529,rs9612645,rs515841,rs517789,rs853152,rs8136537,rs165817,rs165816,rs140466,rs4315628,rs28538662,rs9608307,rs180814,rs5760087,rs853295,rs4820573,rs5751786,rs6004026,rs1135929,rs1807692,rs48205…	25	0
3	190642391	rs61494018	3.47632e-14	171	0	0	14	16	141	rs35679428,rs13323015,rs9862175,rs6444469,rs56068001,rs9838279,rs9849583,rs1393060,rs771140446,rs749413636,rs6804748,rs2202100,rs13075101,rs6799249,rs13083648,rs28873531,rs34113929,rs6802105,rs1501600,rs866986,rs13070564,rs61500084,rs146550622,rs113180518,rs112522420,rs4624605,rs4308324,rs4308325,rs73193907,rs56234707,rs56268441,rs58531798,rs12727448,rs34886272,rs187620717,rs60386222,rs62288104,3…	25	0
3	45809329	rs4327428	1.59539e-09	128	10	19	11	58	30	rs73058498,rs73060324,3:45795731_CTCTT_C,rs9818982,rs17279437	25	0
3	48484016	rs4858820	9.25623e-09	320	19	25	20	191	65	rs4858819,rs730566	25	0
5	122755334	rs12719311	1.9118e-11	605	82	52	56	43	372	rs1428394,rs112446794,rs11241682,rs2407654,rs6887557,rs2407655,rs2407656,rs4516848,rs1962848,rs1962847,rs1962846,rs1019764,rs1019763,rs2195353,rs13189286,5:122677607_TGAG_T,rs6890376,rs11436160,rs2303719,rs1047438,rs1366333,rs1366334,rs4836532,rs4836533,5:122685906_CT_C,rs7717639,rs147130959,rs7736021,rs5871040,rs1428385,rs1428386,rs569694187,rs28891214,rs75434608,rs2407776,rs2407777,rs1428384,rs…	25	0
5	44441703	rs1351637	4.00712e-08	217	102	19	57	6	33	.	25	0
7	120945217	rs1547960	1.67011e-21	355	49	38	101	14	153	rs17284876,rs10953934,rs2222543,rs4731005,rs4731009,rs35061352,rs798910,rs1860753,rs17508690,rs798907,rs12164093,rs17508777,rs798906,rs12534075,rs10276111,rs10233441,rs112901683,rs17509082,rs2952556,rs7809135,rs10250475,rs6961083,rs7794940,rs7795061,rs7778200,rs10241888,rs2707521,rs71170242,rs10282303,rs34155977,rs1547959,rs6980043,rs6947246,rs35883000,rs6952851,rs10277699,rs2707520,rs10231005,rs…	25	0
7	151498679	rs4128399	1.46616e-17	12	0	0	0	2	10	rs34802637,rs4726099,rs56158745,rs4726100,rs62478243,rs13224758,rs12703159	25	0
7	102518909	rs72580510	2.6942e-15	564	17	58	95	65	329	rs73406218,rs9641299,rs77490360,rs10464611,rs11974748,rs4489255,rs4361704,rs149805825,rs12672488,rs9691949,rs199970642,rs9718444,rs56356294,rs7800387,7:102433003_AG_A,rs74708264,rs142264290,rs2908412,rs3933460,rs6975388,rs140795860,rs80313245,rs12671557,rs75387186,rs57253646,rs7780981,rs7779121,rs6946773,rs12538955,rs11981980,rs75197737,rs58919995,rs73406250,rs10487283,rs12669668,rs4357217,rs1713…	25	0
7	96218632	rs1554658	4.70538e-08	491	75	25	72	116	203	.	25	0
1	215139887	rs1452628	2.18015e-13	177	12	21	94	6	44	rs755576,rs6540873,rs10494988,rs7531398,rs76553563,rs12123237,rs78300504,rs17023977	26	4
12	106476805	rs12146713	3.42647e-09	128	17	10	81	4	16	rs12369969	26	4
15	85673176	rs6496733	1.719e-12	733	16	40	80	217	380	rs67613323,rs62022527,rs62022528,rs17611171,rs12908400,rs12912860,rs17611290,rs12906544,rs34978449,rs35668265,rs62021230,rs12902942,rs12909971,rs12900012,rs12909130,rs35885781,rs34105012,rs35843593,rs62021233,rs141678143,rs770857411,rs28887294,rs12917019,rs11632899,rs34054841,rs12908535,rs72757059,rs12909111,rs11632658,rs11630697,rs11634975,rs4980357,rs4980356,rs34262848,rs12904410,rs11634877,rs1…	26	4
16	87233516	rs4843552	4.27164e-09	170	13	45	16	13	83	16:87221841_ATG_A,rs12711472,rs12711473,rs9308341,rs9308343,rs9937293,rs4843227,rs4843560,rs12920553,rs12921170,rs4843555,rs12149643,rs4843553,rs4843550	26	4
3	190652830	rs34859790	4.67756e-12	171	28	3	23	0	117	rs6444469,rs56068001,rs9838279,rs9849583,rs1393060,rs771140446,rs749413636,rs6804748,rs2202100,rs13075101,rs6799249,rs13083648,rs28873531,rs34113929,rs1501600,rs13070564,rs61500084,rs146550622,rs113180518,rs112522420,rs4624605,rs4308324,rs4308325,rs73193907,rs56234707,rs56268441,rs58531798,rs12727448,rs34886272,rs61494018,rs187620717,rs60386222,rs62288104,3:190646282_TA_T,rs13066753,rs13078126,3:…	26	4
3	190602087	rs9818981	1.02875e-11	74	1	0	0	0	73	rs13098006,rs13079050,rs9814367,rs34030983,rs13090681,rs9880346,rs13322873,rs9857963,rs538135044,rs13434373,rs72056004,rs9873268,rs62286348,rs62286349,rs76316471,rs9290958,rs9844152,rs9844338,rs62286352,rs9854712,rs13315587,rs34303823,rs28816787,rs9828756,rs9816578,rs9816886,rs9821167,rs9821075,rs9827488,rs9827516,rs62288073,rs9290959,rs9840870,rs9829689,rs9867760,rs28870076,rs9856237,rs9871399,r…	26	4
3	73713248	rs907338	3.21915e-08	305	59	33	19	61	133	.	26	4
5	122609853	rs77097530	4.66279e-09	88	9	54	23	2	0	.	26	4
5	122757718	rs11953651	3.48875e-08	592	110	158	192	23	109	.	26	4
6	169448796	rs12193635	6.65925e-09	76	11	17	9	9	30	.	26	4
6	35013209	rs13191889	9.5217e-09	377	140	21	38	70	108	rs3823438,rs3800426,rs2820224,rs1568705,rs2820230	26	4
6	169486867	rs73034063	1.13228e-08	147	31	18	19	23	56	rs62435771,rs62435789,rs10485332,rs62435790,rs62435791,rs62435792,rs73034034,rs62435793,rs17788472,rs62435795,rs62435796,rs17184572,rs62435798,rs62435799,rs62435800,rs62435801,rs62435802,rs62435803,rs62435804,rs62434682	26	4
1	215147374	rs78300504	5.6281e-15	200	27	32	85	7	49	rs755576,rs6540873,rs12120334,rs7514200,rs1452628,rs10494988,rs7531398,rs76553563,rs12123237,rs145492984,rs17023977,rs76660218,rs76641944,rs12402694,rs59084003,rs6691805,rs12406318,rs12403837,rs12123258,rs12127113,rs12134208,rs2601647,rs2601645,rs2841614,rs6691229,rs1349671,rs748565506,rs112698436,rs965283,rs115948006,rs35551944,rs1597844,rs12402962,rs75718025	27	2
1	155175089	rs72704117	1.61223e-11	92	1	2	0	1	88	rs72702209,rs72702251,rs150352963,rs72702268,rs140676308,rs141942982,rs111508230,rs41264915,rs35154152,rs67579710,rs11580040,1:155198264_CG_C,rs72704130,rs56894225,rs180921974,rs41314549,rs140959946,rs114760481,rs148015261,rs143612128,rs72704164,rs72704165,rs111652370,rs111360475,rs113671475,rs72704175,rs553470220,rs72704191,rs72704192,rs139932136,rs138522636,rs34172230,rs567387639,rs143582530,rs…	27	2
1	155677255	rs72706130	1.22893e-09	39	0	0	14	8	17	rs116237120,rs72706174,rs140893634,rs72706176,rs72706180,rs190301488	27	2
10	25058144	rs10764494	2.48309e-10	244	54	44	22	10	114	10:25026680_CA_C,rs10764492,rs6482420,rs6482421,rs6482422,rs7083008,10:25028364_CAA_C,rs1414457,rs1414458,rs1414459,rs7912395,rs7900706,rs6482430,rs4747494,rs4748970,rs7905360,rs7902525,rs142961996,rs10828692,rs10828693,rs10828694,rs10828695,rs9943380,rs7068753,rs9943341,rs4436453,rs4459182,rs7922575,rs7919485,rs6482431,rs6482432,rs4072915,rs7903650,rs11014220,rs11014222,rs4747495,rs12246501,rs47…	27	2
11	27332214	rs10734390	1.52727e-15	336	0	5	32	61	238	rs34493522,rs10835148,rs7483297,rs7948420,rs1038099,rs1871255,rs1038100,rs1351174,rs7482271,rs1351175,rs6416055,rs7480454,rs7950903,11:27285397_GA_G,11:27285591_TTAG_T,rs11029901,rs7929461,rs7120368,rs7478918,rs10835149,rs1478690,rs7481109,rs7484147,rs7481148,rs7937389,rs6484283,rs6484284,rs6484285,rs7110359,rs10835150,rs7115024,rs7115157,rs6484286,rs6484287,rs7119628,rs7123838,rs7123749,rs712694…	27	2
11	110947519	rs321350	4.7789e-13	276	30	29	8	25	184	rs321348,rs11418777,rs73015136,rs321403,rs321404,rs7941114,rs321406,rs11213729,rs68122012,rs1878536,rs1878537,rs7924641,rs12275746,rs12276034,rs321414,rs321416,rs321418,rs321422,rs7123402,rs574760,rs167684,rs536579,rs576877,rs1900556,rs7926634,rs7940380,rs1517578,rs111506341,rs7939631,rs7927998,rs73021576,rs73021578,rs527397,rs73003515,rs73003519,rs1517581,rs547367,rs516110,rs17460676,rs555063,rs…	27	2
12	21469942	rs34249976	2.40355e-08	451	51	97	63	92	148	rs12307908,rs7962263,rs7962919,rs10841789	27	2
13	50811916	rs1326127	8.969e-09	217	2	28	118	35	34	rs769656666,13:50806063_AAACAAC_A,rs2765767,rs2580190,rs2812196,rs2066660	27	2
15	85693016	rs2342118	7.29876e-10	738	78	234	166	32	228	rs896364,rs7173332,rs62022525,rs12900078,rs116893322,rs34585903,rs796672389,rs71397835,rs17611171,rs12908400,rs12912860,rs17611290,rs12906544,rs35668265,rs62021230,rs12902942,rs12909971,rs12900012,rs12909130,rs35885781,rs35843593,rs62021233,rs141678143,rs28887294,rs12917019,rs11632899,rs34054841,rs12908535,rs35127646,rs72757059,rs12909111,rs56046484,rs11632658,rs11630697,rs11634975,rs4980357,rs49…	27	2
15	71612514	rs1441358	1.89516e-08	281	46	32	85	74	44	rs28398466,rs11631778,rs28529655	27	2
15	81501615	rs11634864	3.58728e-08	232	14	8	22	18	170	rs17337055,rs17337098,rs66933405,rs67601221,rs150752466,rs11639206,rs115781366	27	2
16	87224293	rs12711473	4.38053e-26	170	0	1	2	9	158	rs12934042,rs4843223,rs11641115,16:87216713_ATGCAGTATATGGC_A,rs9922143,rs56399712,rs9783773,rs9783786,rs11864957,rs12447701,rs11864791,rs11861940,rs11861033,16:87221841_ATG_A,rs9888792,rs111864226,rs12711472,rs9308341,rs9308342,rs9308343,rs9308344,rs9937293,rs4843227,rs4843560,rs4843226,rs4843559,rs4843558,rs4843557,rs7205039,rs9933149,rs12921714,rs12921347,rs12920553,rs12922411,rs12921170,rs4843…	27	2
2	111599282	rs10210955	2.78686e-08	266	43	3	6	21	193	.	27	2
20	10739837	rs765811681	2.23798e-09	49	25	3	2	5	14	.	27	2
22	38138284	rs34134374	2.27796e-08	387	6	10	40	175	156	rs4820303,rs4821703,rs4239889,rs11089854,rs12485175,rs3788529,rs35076956,rs4821708,rs775684617,rs34848977,rs13058615,rs3171656,rs15691	27	2
22	38649783	rs9610923	3.27463e-08	286	9	9	9	80	179	.	27	2
3	73701678	rs1511520	3.99684e-09	306	31	43	69	73	90	rs6781766,rs6805318,rs9310276,rs9310278	27	2
3	194470632	rs10933668	6.14808e-09	180	35	44	38	48	15	rs6777925,rs4677637,rs4393849,rs4234201,rs4361226,rs10933671,rs4677743,rs4677744,rs6437417	27	2
5	122755606	rs7707090	4.09603e-19	623	38	23	21	59	482	rs562297143,rs4308481,rs4836528,rs13156484,rs1582931,rs1428394,rs112446794,rs11241682,rs2407654,rs6887557,rs2407655,rs2407656,rs4516848,rs1962848,rs1962847,rs1962846,rs1019764,rs1019763,rs2195353,rs13189286,5:122677607_TGAG_T,rs12520233,rs1047440,rs2303719,rs1047438,rs1366333,rs1366334,rs7725869,rs6595438,rs6891155,rs4836532,rs4836533,rs2115172,rs2115173,rs748649855,rs7735212,rs7717639,rs14713095…	27	2
5	122609853	rs77097530	1.59572e-10	46	1	1	8	6	30	rs78235140	27	2
5	102958282	rs11948851	2.73663e-08	43	25	3	0	0	15	rs17155558	27	2
6	35009578	rs2820224	7.92963e-14	390	16	117	52	32	173	rs58737173,rs3823438,rs3800426,rs1568705,rs2820230,rs13191889,rs820098,rs820097,rs820096,rs820094,rs820092,rs820091,rs820089,rs820088,rs820087,rs820086,rs820084,rs12197124,rs820082,rs820081,rs820080,rs820079,rs820078,rs6937805,rs56365371,rs752871093,rs74645761,rs820076,rs820075,rs820074,rs17609940,rs865353,rs820073,rs1093985,rs820071,rs820068,rs12154140,rs707967,rs12154189,rs4276486,rs2689097,rs2…	27	2
6	16750011	rs562760	4.83354e-08	104	4	15	32	8	45	.	27	2
7	120965464	rs10668066	1.09466e-13	168	80	12	9	3	64	rs3779381,rs2908004,rs142005327,rs2536189,rs3801387,rs55963900,rs2707466,rs10242100,rs2536185,rs3801383,rs3801382,rs7807953,rs7808155,rs12539772,rs56364616,rs917727,rs917726,rs718766,rs12531355,rs7776725	27	2
7	2897799	rs71524003	5.16261e-13	336	13	16	55	23	229	rs798565,rs798563,rs798562,rs1184662,rs798561,rs798560,rs798559,rs798558,rs798557,rs798556,rs34802551,rs798555,rs798554,rs798552,rs798551,rs798550,rs798548,rs798547,7:2761349_CA_C,rs798546,rs798545,7:2762764_AAAG_A,rs798544,rs798540,rs78018097,rs798536,rs709282,rs798531,rs798528,rs798526,rs798518,rs798514,rs798513,rs798512,rs798511,rs798510,rs798508,rs798506,rs798502,rs798500,rs529794364,rs798498…	27	2
7	19614777	rs777923063	1.63296e-12	371	0	1	62	18	290	rs4721778,rs4721779,rs4721780,rs4719564,rs4719565,rs10245919,rs12534570,rs12536555,rs2024347,rs2192486,rs4602789,rs1476944,rs759249,rs2192485,rs10244808,rs6963439,rs7794428,rs146273948,rs2192482,rs7789868,rs10276556,rs71017060,rs2390118,rs12700056,rs12700057,rs9648259,rs9648260,rs9648261,rs12700058,rs12535260,rs12532587,rs12700059,rs6965709,rs2080222,rs10242663,rs985307,rs985306,7:19574283_CAT_C,…	27	2
8	120596023	rs10283100	3.96289e-09	20	12	2	4	2	0	.	27	2
9	13934316	rs4130987	1.6433e-08	424	25	63	153	77	106	.	27	2
11	110946372	rs11418777	1.96351e-15	275	10	3	1	35	226	rs321348,rs321350,rs73015136,rs321403,rs321404,rs7941114,rs321406,rs11213729,rs68122012,rs1878536,rs1878537,rs7924641,rs12275746,rs12276034,rs321414,rs321416,rs321418,rs321422,rs7123402,rs574760,rs167684,rs559757,rs560503,rs514347,rs565152,rs539009,rs516177,rs17459717,rs494921,rs580656,rs536679,rs502584,rs511835,rs534858,rs536579,rs576877,rs1900556,rs7926634,rs7940380,rs1517578,11:111022214_GGTGT…	28	3
11	111025039	rs34077344	3.62487e-12	35	18	1	2	5	9	rs59614433,rs12794347,rs58066679,11:111056921_AATGTGGTAGCTTCC_A,rs1607232	28	3
12	79759508	rs1268918	4.12832e-08	134	1	1	3	10	119	rs1245774,rs1245775	28	3
16	87224857	rs9308343	6.10496e-10	155	16	36	7	13	83	16:87221841_ATG_A,rs12711472,rs12711473,rs9308341,rs9937293,rs4843227,rs4843560,rs4843226,rs4843559,rs4843558,rs9933149,rs12920553,rs12921170,rs56023709,rs4843555,rs12149643,rs4843553,rs4843552,rs4240791,rs4843550,rs35408318,rs28655023	28	3
18	52906830	rs60565673	2.54656e-08	284	71	28	46	29	110	rs8090085,18:52903042_AT_A,rs1261073,rs1893431,rs62092442,rs1261134	28	3
18	42469848	rs9807721	3.90418e-08	114	17	9	18	33	37	.	28	3
3	190656984	rs883842	2.92978e-15	172	1	2	30	16	123	rs35679428,rs13323015,rs9862175,rs6444469,rs56068001,rs9838279,rs9849583,rs1393060,rs771140446,rs749413636,rs6804748,rs2202100,rs13075101,rs6799249,rs13083648,rs28873531,rs34113929,rs6802105,rs1501600,rs866986,rs13070564,rs61500084,rs146550622,rs113180518,rs112522420,rs4624605,rs4308324,rs4308325,rs73193907,rs56234707,rs56268441,rs58531798,rs12727448,rs34886272,rs61494018,rs187620717,rs60386222,r…	28	3
3	190647581	rs7616662	1.13525e-10	73	1	0	0	4	68	rs13079050,rs9814367,rs34030983,rs13090681,rs9880346,rs13322873,rs9857963,rs538135044,rs13434373,rs72056004,rs9873268,rs62286348,rs62286349,rs76316471,rs9818981,rs9290958,rs9844152,rs9844338,rs62286352,rs9854712,rs13315587,rs34303823,rs28816787,rs9828756,rs9816578,rs9816886,rs9821167,rs9821075,rs9827488,rs9827516,rs62288073,rs9290959,rs9840870,rs9829689,rs9867760,rs28870076,rs9856237,rs9871399,rs…	28	3
5	122609853	rs77097530	1.60422e-10	88	54	24	10	0	0	.	28	3
7	151498679	rs4128399	7.0345e-13	12	0	1	1	2	8	rs34802637,rs4726100,rs62478243,rs13224758	28	3
8	108941705	rs593872	1.15549e-08	420	153	71	17	68	111	rs4735016,rs622634,rs557606,rs2047197,rs1098815,rs534702,rs491126,rs668941,rs624798,rs613502,rs565835,rs796496155,rs594725,8:108949730_TA_T,rs521242,rs609820,rs504380,rs554316,rs688754,rs673812,rs673355,rs505451,rs2453419,rs2453420,rs2047198,rs2047199,rs619863,rs634897,rs514848,rs661291,rs548953,rs549780,rs664001,rs498232,rs676613,rs502610,rs503575,rs598944,rs3039298,rs601558,rs629702,rs656624,rs…	28	3
9	98272284	rs569747736	1.14825e-08	115	2	2	35	14	62	rs28620532,rs28701981,rs2236406,rs2274692	28	3
1	215139887	rs1452628	3.60831e-30	177	24	11	6	4	132	rs755576,rs6667184,rs12757359,rs10494987,rs6540873,rs2167688,rs562410,rs476557,rs507072,rs1452630,rs10494988,rs4517324,rs487208,rs1582113,rs7531398,rs76553563,rs12123237,rs145492984,rs1890007,rs78300504,rs864736,rs17023977,rs543029,rs76641944,rs1452631,rs495296,rs1452632,rs59084003,rs6681013,rs12403837,rs12123258,rs2841622,rs2841621,rs2601634,rs2841616,rs58723789	29	1
1	215152226	rs76660218	9.70901e-22	169	3	1	3	30	132	rs12120334,rs7514200,rs12402694,rs6691805,rs12406318,rs544535,rs12127113,rs12119060,rs12134208,rs2601647,rs2601645,rs1901622,rs2841614,rs6691229,rs1597846,rs1349671,rs748565506,rs112698436,rs199989108,rs1452611,rs965283,rs753718556,rs115948006,rs35551944,rs1597844,rs34437031,rs2841593,rs2841590,rs2841589,rs1156732,1:215206547_CTT_C,rs2841586,rs2841585,rs2841584,rs1452613,rs2841582,rs2601626,rs260…	29	1
1	180905694	rs3795503	2.04689e-12	96	43	9	13	12	19	rs1609829,rs12023606	29	1
1	56946799	rs6588636	9.01967e-09	188	50	33	62	17	26	1:56935380_GC_G,rs10789022,rs36018890	29	1
1	155198264	1:155198264_CG_C	3.89302e-08	138	8	15	21	24	70	.	29	1
1	215691268	rs114164928	4.59017e-08	78	64	1	7	4	2	.	29	1
12	106476805	rs12146713	5.07652e-23	128	0	1	21	4	102	rs2436623,rs12369969,rs73193824,rs1427793,rs1064959,rs3741884,rs17038091,rs1978730,rs73193841,rs1896364,rs7485023,rs10778458,rs11112866,rs73193855,rs112312971,rs55657928,rs3782692,rs12370774	29	1
12	46743346	rs12368989	4.25656e-09	344	0	9	52	68	215	rs2408496,rs12298619,rs7316127,rs34691412,rs36013499,rs7134310,rs60420550,rs7315493,rs763443853,rs532477439,rs1079780,rs12816358,rs9668077,rs4768698,rs7974529,rs7960147,rs7961994,rs75630105,rs3782904,rs2307061,rs7968173,rs7968283,rs956910,rs3832874,rs10880959,rs10880960	29	1
13	27854518	rs12874945	2.23885e-11	199	19	28	64	48	40	rs1114448,rs9512532,rs9512533,rs9512534,rs7984570,rs9512535,rs4771070,rs9553960,rs9551356,rs565707,rs12865483,rs3858763,rs2148760	29	1
15	85693016	rs2342118	6.13041e-19	738	76	149	150	43	320	rs67613323,rs11629962,rs11629963,rs62022527,rs62022528,rs7359256,rs4980341,rs11439217,rs66550763,rs62021182,rs4980340,rs62021184,rs11629967,rs12903975,rs3862411,rs17611171,rs289392,rs12908400,rs12912860,15:85573935_CTT_C,rs289390,rs289388,rs439313,rs289382,15:85578937_TG_T,rs17611396,rs289386,rs289387,rs12902942,15:85586911_TTTTGTTTG_T,rs12909971,rs12900012,rs12909130,rs141678143,rs28887294,rs116…	29	1
15	81497088	rs150752466	3.17707e-08	250	33	16	13	33	155	rs17337098,rs66933405,rs67601221,rs115781366,rs575010033,rs66540250,rs72744137,rs11635456	29	1
16	87227046	rs12920553	1.10721e-33	171	9	7	13	3	139	rs12934042,rs4843223,rs11641115,16:87216713_ATGCAGTATATGGC_A,rs9922143,rs56399712,rs9783773,rs11863620,rs9783786,16:87221841_ATG_A,rs9888792,rs111864226,rs12711472,rs12711473,rs9308341,rs9308342,rs9308343,rs9308344,rs9937293,rs4843227,rs4843560,rs4843226,rs4843559,rs4843558,rs4843557,rs7205039,rs9933149,rs12921714,rs12921347,rs12922411,rs12921170,rs4843556,rs7196520,rs7203251,rs56023709,rs6540016…	29	1
16	49879618	rs143348420	1.61434e-11	65	5	1	11	5	43	rs768775000,rs73577318,rs73577328,rs34212526,rs73577330,rs12443775,rs16948031,rs73569791,16:49870993_TG_T,rs59965309,rs12446455,rs73569800,rs60972513,rs56953920,rs35332951,rs73571612,rs149600709,rs60482068	29	1
16	87283439	rs62056198	6.80139e-11	201	14	17	59	47	64	rs1966575,rs4843581,rs4843583,rs17770675,rs28625347,rs28680300,rs4843586,rs74038423,rs74379015	29	1
16	87331903	rs112604269	1.10529e-08	3	0	1	0	0	2	rs72804073	29	1
17	25783535	rs114378193	7.36629e-10	289	0	8	14	115	152	rs11080176,rs12602712,rs883127,rs60304204	29	1
17	75400690	rs1110638	1.10883e-08	117	6	21	12	4	74	rs2898646,rs747147,rs892961,rs2411110,rs312857,rs11077907,rs1075457,rs2164449,rs2117924,rs312856,rs11653743,rs2411111,rs2411112,rs2898647,rs61010755,rs11077909,rs7216116,rs7216155,rs7216909,rs34148977,rs11657961,rs11657725,rs312853,rs12452788,rs2574840,rs55661113,17:75408957_CT_C,rs9916143,rs10644702,rs7223768,rs11658267,rs747483,rs747482,rs747481,rs749461689,rs35489990,rs11650011,rs35217221,rs35…	29	1
17	55368116	rs11079287	2.66387e-08	143	3	20	29	44	47	rs4239207,rs4239208,rs4341799,rs4794716,rs13353194,rs6503805	29	1
18	60883301	rs12967026	1.84498e-08	31	0	0	0	0	31	rs113421548	29	1
19	39243956	rs4452073	3.52471e-08	225	5	3	31	28	158	rs2887269	29	1
2	56135099	rs78857879	2.2424e-11	294	31	100	108	36	19	2:56116193_TTGATTCTTGGCCTCCCTCCC_T,2:56127099_AT_A,rs7596872,rs4233964,rs3762515,rs113481311,rs146896516	29	1
20	10458616	rs680597	1.87323e-08	311	39	68	11	65	128	rs7274256,rs680515,rs6039971	29	1
22	21200551	22:21200551_CAA_C	2.62656e-15	641	10	138	31	52	410	rs2110412,rs4822429,rs4820558,rs488506,rs490365,rs520698,rs9608279,rs552668,rs499113,rs583208,rs598141,rs565979,rs479275,rs511527,rs542771,22:21031583_GT_G,rs672235,rs491228,rs853148,rs591446,rs637335,rs639715,rs670529,rs9612645,rs515841,rs588329,rs517789,rs853152,rs5751736,rs8136537,rs165817,rs165816,rs140466,rs4052260,rs1042668,rs4315628,rs28538662,rs9608307,rs180814,rs3930342,rs4557089,rs57600…	29	1
3	194472606	rs6777925	6.63869e-19	180	4	10	41	18	107	rs6437412,rs4677737,rs10933668,rs10933669,rs12495984,rs58005101,rs62290988,rs60799707,rs58357770,rs57295137,rs7627816,rs59925255,3:194474334_CG_C,rs57989961,rs35211338,rs59862670,rs4677635,rs34115034,rs4677636,rs4677637,rs4677638,rs4677639,rs4234200,rs4324426,rs4311168,rs3890437,rs62291017,rs4416332,rs4393849,rs4234201,rs4677738,rs61321104,rs58995417,rs58214396,rs62291021,rs7616725,rs4361226,rs44…	29	1
5	2387453	rs931284	1.27661e-08	77	4	23	6	0	44	rs931283	29	1
5	122750714	rs6868198	2.89017e-08	626	282	19	33	40	252	rs6595448,5:122754293_GTT_G,rs7729285,rs7706662	29	1
6	35009578	rs2820224	1.08171e-10	390	115	30	92	46	107	6:34922921_CT_C,rs3823438,rs3800426,rs1568705,rs2820230,rs13191889,rs820076,rs820075,rs865353	29	1
6	149402362	rs6940664	1.94263e-10	405	4	22	63	163	153	rs9404010,rs9322162,rs9377183,rs9386241,rs12204964,rs6936508,rs9404011,6:149306523_AAACAACAAC_A,rs12207855,rs12207913,rs12194615,rs9377186,6:149308232_AT_A,rs1564601,6:149308963_ATCT_A,rs1564602,rs4358650,rs9390647,rs9390648,rs9390652,rs1934227,rs34368036,rs4335010,rs6570921,rs17669546,rs34599887,rs9498197,rs4441968,rs6570923,rs6570924,rs12200909,rs2153252,rs11429928,rs3949414,rs6914281,rs1215392…	29	1
7	102484447	rs7779145	1.98113e-16	551	9	36	117	81	308	rs9641299,rs77490360,rs10464611,rs11974748,rs4489255,rs4361704,rs149805825,rs12672488,rs9691949,rs199970642,rs9718444,rs56356294,rs7800387,7:102433003_AG_A,rs74708264,rs142264290,rs2908412,rs3933460,rs6975388,rs140795860,rs80313245,rs12671557,rs75387186,rs57253646,rs7780981,rs7779121,rs6946773,rs12538955,rs11981980,rs75197737,rs58919995,rs73406250,rs10487283,rs12669668,rs4357217,rs17136090,rs1266…	29	1
7	2795957	rs798497	3.91058e-12	349	14	20	76	29	210	rs798565,rs798563,rs798562,rs798560,rs798559,rs798558,rs798557,rs798556,rs34802551,rs798555,rs798554,rs798552,rs798551,rs798550,rs798548,rs798547,7:2761349_CA_C,rs798546,rs798545,7:2762764_AAAG_A,rs798544,rs798540,rs78018097,rs798536,rs798528,rs798526,rs798518,rs798514,rs798511,rs798510,rs798508,rs798506,rs798502,rs798500,rs529794364,rs798498,rs798496,rs798495,rs798494,rs798493,rs798491,rs798490,…	29	1
7	134388544	rs6973339	5.33324e-11	182	5	20	19	6	132	rs34845444,rs4728335,rs4524734,rs10954464,rs11762352,rs2347696,rs2347697,rs2347698,rs6467551,rs6944563	29	1
7	103009009	rs12535070	4.15525e-10	43	2	3	4	18	16	rs12536983	29	1
7	115836797	rs2402053	1.36294e-09	622	177	49	174	156	66	rs2896175,rs10953811,rs12536669,rs6977233,rs6959449,rs6977380,rs6977757,rs6949241,rs28710948,rs4082046,rs10245914,rs747202719,rs4436065,rs4535671,7:115823119_GT_G,rs6968419,rs10953813,rs36030507,rs10261818,rs10261823,rs6947586,rs11764793,rs6979486,rs6967663,7:115836320_CT_C,rs10235059,rs940471	29	1
1	47980916	rs6658111	4.06482e-34	305	0	0	7	21	277	1:47805707_TCCCTCCCCTC_T,rs12121831,rs12562561,rs55737131,1:47813750_TA_T,rs2820994,rs2622925,rs12127982,rs2820989,rs2622908,rs2820988,rs2622907,rs6588365,rs2622905,rs2246707,rs2820987,rs3122610,rs3125647,rs2622901,1:47835581_CT_C,1:47835699_GTC_G,rs3214951,rs34374399,rs55918644,rs56328227,rs12119783,rs56270164,rs6662814,rs6673934,rs55718554,rs2405922,rs4603175,rs11577621,rs6691595,rs10399673,rs6…	30	3
1	12546694	rs12125606	3.59348e-08	38	18	9	3	2	6	.	30	3
12	28218232	rs229988	4.24612e-11	192	3	22	5	41	121	rs6487657,rs6487658,rs6487659,rs11049320,rs1842194,rs1600345,rs7975563,rs10843085,rs10843086,rs10843087,rs7969830,rs10843099,rs10843100,rs10843101,rs1351266,rs35247497,rs12229872,rs11049365,rs11049368,rs16932640,rs7977538,rs1965280,rs1463571,rs2881787,rs11049373,rs35787832,rs10459090,rs10459091,rs1841964,rs35098487,rs756890699,rs9300176	30	3
12	95522289	rs10859837	2.43212e-09	479	16	72	81	136	174	rs9804833,rs10777670,rs4128507,rs7309426,rs10777674,rs10777676,12:95615631_CA_C,rs1488643,rs1873051,rs35921723,rs6538620,rs35155695,rs9706167,rs4762340,rs11107968,rs4762342,rs12298029,rs1387047,rs10777683,rs7300457,rs7308919,rs11107974,rs11107975,rs11107976,rs10859871,rs4762173	30	3
12	28128832	rs76301015	3.88731e-09	200	14	16	63	85	22	rs61915978,rs11049248,rs11049250,rs73094066,rs11049252,rs10843049,rs11049254,rs11049255,rs11049256,rs11049257	30	3
12	28737797	rs11049727	4.76721e-09	871	207	2	2	1	659	rs4931727,rs4931729,rs2127315,rs71452082,rs36097532,rs76673551,rs2045887,rs7305378,12:28432808_CTG_C,12:28432844_GT_G,rs2172299,rs11049503,rs61922974,12:28436470_AT_A,rs61922975,rs61922976,rs61922977,rs11049505,rs11049507,rs11049509,rs11049510,rs61922978,rs12372448,rs11049511,rs200125551,rs7964793,rs11049515,rs11049516,rs74567249,rs61922979,rs11049517,rs11049518,rs12368409,rs10843150,rs3825246,rs…	30	3
12	28266382	rs78804134	5.31819e-09	92	22	11	6	6	47	rs75547058,rs144396101,rs17575785,rs17603585,rs59084530,rs10459088,rs10459089,rs7316732,rs1904387,rs1993936,rs2127316,rs7971974,rs7305790,rs11049364	30	3
16	82125995	rs2966249	1.15006e-09	97	0	5	14	23	55	rs10514523,rs9788807,rs139197622,rs9319572,rs1981878,rs1559429,rs723012,rs1364287,16:82119557_TA_T,rs1559427,rs6564962,rs9939740,rs4889456,rs1017243,rs1017242,rs2911420,rs6564964,rs9934209,rs2966248,rs8182164,rs7499494,rs1364286,rs1364285,rs4888202,rs9940004,rs9925455,rs8191243,rs8191248,rs996751,rs1119933	30	3
17	2055880	rs11650850	2.46402e-09	488	142	54	106	86	100	rs35285876,rs72815304,rs11654636,rs11654642,rs11653927,rs12325821,rs72815348,rs11650922,rs12449843,rs12449873,rs7221132,rs72817574,17:2080698_GAA_G	30	3
19	39143289	rs13344413	3.34526e-09	367	27	39	127	44	130	rs2303040,rs12460849,rs979972,rs979971,rs55876653,rs56365761,19:39164393_ATT_A,rs62121818,19:39168010_AACAG_A,rs10406778,rs60687267,rs7252589,rs3786837,rs3786839,rs10421560,rs11083475,rs55873140,rs150394753,rs138217270	30	3
22	45816269	rs9614467	8.481e-11	322	9	7	8	37	261	rs6006984,rs6519922,rs6519923,rs8138866,rs6007587,rs720682,rs1473953,rs6006985,rs6006987,rs6007591,rs11556482,rs17851057,rs1056322,rs1044744,rs6007600,rs2294203,rs3747237,rs3747239,rs12160956,rs9614460,rs6006995,rs6006996,22:45813886_GT_G,rs199513388,rs112587279,rs9306476,rs2142661,rs2142662,rs9614663,rs9614664,rs11705686,22:45828653_CTGG_C,rs9614666,rs9614667	30	3
3	132397792	rs62292465	1.17329e-08	303	23	9	15	7	249	rs6777072,rs75537912,rs62291485,rs62291486,rs62291488,rs3804636,rs11926081,rs61292904,rs62291499,rs62291501,rs41272321,rs527252460,rs62291503,rs62291504,rs2305626,rs57632080,rs2305627,rs17413620,rs149406042,rs10804611,rs62291553,rs62291556,rs11918640,rs11915025,rs11926381,rs61364254,rs62291558,rs1079367,rs17348055,rs6776500,rs9637394,rs62292460,rs62292461,rs1001122,rs57439039,rs59426843,rs1093502…	30	3
7	120874220	rs774259378	1.31596e-11	375	1	20	14	18	322	rs798943,rs2968338,rs1296405,rs13245677,rs798946,rs12673770,rs12706313,rs34320754,rs549829667,rs34249834,rs7801723,rs12706318,rs10953928,rs13232048,rs35758028,rs6947453,rs6952113,rs6951990,rs34770628,rs872007,rs872008,rs868053,rs884373,rs10234955,rs10235232,rs10275439,rs10261671,rs10280039,rs13245690,rs35348547,rs10258619,rs1917110,rs1404264,rs776700095,rs6950680,rs66871562,rs35789132,rs6968039,r…	30	3
7	120959062	rs2908008	1.06889e-08	63	27	2	2	5	27	rs3801387,rs55963900,rs10242100,rs3801383,rs3801382,rs7807953,rs7808155,rs12539772	30	3
8	6381992	rs17077317	1.81333e-08	156	15	4	26	3	108	rs71525733	30	3
1	66150510	rs55953331	4.03149e-08	376	214	36	37	71	18	.	31	9
12	106476805	rs12146713	4.2243e-08	128	0	1	102	17	8	.	31	9
15	48716853	rs2015637	1.77877e-08	263	32	5	4	32	190	rs11636344,15:48737340_CACATATATATAT_C,rs79307111,rs77105137,rs550272847,rs7174973,15:48780504_TTAAAGA_T,rs116842662	31	9
16	87229344	rs56023709	4.91665e-19	172	0	1	14	11	146	rs11641115,rs12447701,rs11864791,16:87221841_ATG_A,rs9888792,rs111864226,rs12711472,rs12711473,rs9308341,rs9308342,rs9308343,rs9308344,rs9937293,rs4843227,rs4843560,rs4843226,rs4843559,rs4843558,rs4843557,rs7205039,rs9933149,rs12921714,rs12921347,rs12920553,rs12922411,rs12921170,rs4843556,rs7196520,rs7203251,rs6540016,rs7185688,rs11644651,rs7191546,rs6540017,rs11860417,rs4843555,rs12149643,rs4843…	31	9
16	86609037	rs4843397	3.36997e-10	145	31	13	7	17	77	rs61676736,rs4843165,rs67089055,rs67782872,rs67785750,rs8059253,rs55845372,rs67049921,rs4843398,rs7199751,rs7199787,rs12445561,rs12445412	31	9
11	110947521	rs73015136	1.27414e-10	276	40	8	12	72	144	rs321348,rs11418777,rs321350,rs321403,rs321404,rs7941114,rs321406,rs11213729,rs68122012,rs1878536,rs1878537,rs7924641,rs12275746,rs12276034,rs321414,rs321416,rs321418,rs321422,rs7123402,rs574760,rs167684	32	7
12	106476805	rs12146713	1.4504e-09	128	25	0	5	94	4	rs12370774	32	7
20	11304211	rs6078132	2.93615e-11	517	25	32	240	55	165	rs2024621,rs988788,rs6078118,rs1997877,rs1997876,rs6033092,rs6040515,rs6033095,rs722568,rs6108906,rs6108909,rs6074279,rs112329508,rs17800232,rs6078136,rs1028440,rs6074281,rs13038948,rs13039061,rs34263258,rs6074283,rs6078138,rs6104738,rs11698064,rs6104739,rs6078140,rs1535071,rs1535072,rs144760488,rs13043539,rs6078141,rs2327402,rs28479511,rs28612819,20:11350094_TCA_T,rs6074287,rs6078143,rs6078144,r…	32	7
5	91000367	rs331387	2.50196e-08	367	30	165	30	35	107	rs2973825,rs2914024,rs2453823,rs331393,rs331392,rs331390,rs34721690,rs2657816,rs2561063,rs12332628,rs13166131,rs4100683,rs10055754	32	7
7	96210219	rs201650162	3.19215e-16	514	61	30	148	13	262	rs62470051,rs10225703,rs10953179,rs754036861,rs4296976,rs6465515,rs4566970,rs7776689,rs7776846,rs12530658,rs12530663,rs7798484,rs13239179,rs13228199,rs6943323,rs6943472,rs6963647,rs12234766,rs7786962,rs12704851,rs7792972,rs12704852,rs10458281,rs4146263,rs11972202,rs12539259,rs10953180,rs10953181,rs10953182,rs10953183,rs5000437,rs5000436,rs35371656,rs12536037,rs12530918,rs4324868,rs774448136,rs102…	32	7
7	120979089	rs2707466	5.37189e-12	258	175	3	9	5	66	rs2908008,rs10668066,rs3779381,rs2908004,rs142005327,rs2536189,rs3801387,rs55963900,rs10242100,rs2536185,rs2536182,rs3801383,rs2536180,rs2244812,rs2270215,rs2536172,rs3801382,rs552474581,rs7807953,rs7808155,rs12539772,rs2254595,rs56364616,rs917727,rs3068114,rs917726,rs718766,rs12531355,rs7807894,rs4727924,rs7776725,rs7793554	32	7
7	19616316	rs4509205	7.88023e-09	353	5	21	35	49	243	rs714392,rs10230207,rs10807794,rs2192476,rs12538102,rs6461445,rs6461446,rs7798205,rs7802880,rs4236295,rs4236296,rs4337996,rs4719574,rs9655167,rs55636616,rs4719575,rs4721791,rs4719576,rs4721792,rs9655174,rs9655175,rs13437937,rs12668384,rs12668367,rs7782309,rs7801835,rs7805758,rs7786609,rs7786622,rs4626493,rs2390142,rs2390143,rs2390144,rs2390145,rs2390146,rs13438043,rs13438100,rs17451868,rs4141046,…	32	7
8	120134866	rs6469814	6.50915e-12	306	1	10	64	7	224	rs13264791,rs5894469,rs4354338,rs6469794,rs4355805,rs4336637,rs7838083,rs67819415,rs34264040,rs7013203,rs6469796,rs6469798,rs4397431,rs4327884,rs7822098,rs10955919,rs1905777,rs1905778,8:120022087_TA_T,rs34010628,rs4546691,rs6469801,rs2326192,rs6469802,rs2326193,rs7016585,rs6999476,rs12682278,rs13262276,rs6996754,rs1485285,rs4307369,rs10090576,rs35746859,rs1485295,rs10086835,rs7004459,rs7004539,rs…	32	7
8	120048149	rs6469805	6.62745e-09	269	53	53	4	28	131	rs4424296,rs4335155,rs1905784,rs1905783,rs4273881,rs6469795,rs9650075,rs6469797,rs4424291,rs4495460,rs4495461,rs76392809,rs4360322,rs4422806,rs1586273,rs6999463,rs7017691,rs4617188,rs1586274,rs7464464,rs4577982,rs28437165,rs28621599,rs7004052,rs4403441,rs7813486,rs10505351,rs4615609,rs7013731,rs10098408,rs1905779,rs17176952,rs1485312,rs4401893,8:120045484_CT_C,rs28847314,rs7013722,rs7018198,rs187…	32	7
1	215139887	rs1452628	1.15319e-18	177	26	15	5	8	123	rs755576,rs6540873,rs562410,rs476557,rs507072,rs10494988,rs487208,rs7531398,rs76553563,rs12123237,rs145492984,rs1890007,rs78300504,rs864736,rs17023977,rs543029,rs76641944,rs495296,rs1452632,rs59084003,rs6681013,rs12403837,rs12123258	33	6
1	215185552	rs2601645	5.51203e-15	193	14	43	36	16	84	rs12120334,rs7514200,rs76660218,rs12402694,rs6691805,rs12406318,rs12127113,rs12134208,rs2601647,rs2841614,rs6691229,rs1349671,rs748565506,rs112698436,rs199989108,rs965283,rs115948006,rs35551944,rs1597844,rs12402962,rs75718025,rs75277616,rs12125124	33	6
1	155175089	rs72704117	2.19343e-10	92	1	1	3	3	84	rs72702268,rs140676308,rs35154152,rs67579710,rs72704130,rs56894225,rs180921974,rs41314549,rs140959946,rs114760481,rs148015261,rs143612128,rs72704164,rs111360475,rs553470220,rs72704191,rs72704192,rs139932136,rs138522636,rs34172230,rs143582530,rs72706118,rs146554560	33	6
1	155677255	rs72706130	6.37521e-09	39	0	0	16	7	16	rs72706174,rs72706180	33	6
1	47980916	rs6658111	4.17375e-08	305	44	169	66	22	4	rs61784835	33	6
11	130483340	rs7934451	1.15361e-08	169	12	15	16	21	105	rs4937543,rs7102981,rs2875273,rs7125089,rs2324137,rs1921582,rs4937545,rs7111124,rs7929093,rs4937550,rs7111373,rs35459281	33	6
12	106510413	rs12370774	1.21808e-08	132	24	2	11	91	4	rs12146713	33	6
14	54413001	rs66913363	4.75796e-11	57	1	0	0	6	50	rs7159662,rs11157993,rs2358432,rs11623717,rs12893484,rs12898159,rs17563,rs2071047,rs2855532,rs2761882,rs71446481,rs2761884,rs2855530,rs2738265,rs762643,rs2761887,rs2032423,rs8014363	33	6
14	68880701	rs17105586	9.63507e-09	338	34	19	88	15	182	14:68880653_GT_G	33	6
16	2162361	rs2549677	6.2714e-09	99	9	5	13	8	64	rs116092985,rs74331768,rs75510884,rs2369068,rs11861948,rs28605000,rs147047165	33	6
18	53384696	rs12963600	3.73485e-09	255	60	47	43	26	79	rs8090341,rs644279,rs12457157,rs12103984,rs6566169,rs35691742,18:53308061_AT_A,rs17089911,rs12457071,18:53362049_CCTCT_C,rs2901982,rs12456600,rs34704381,rs149804814,rs11662998,rs899104	33	6
2	71961307	rs12466122	6.46224e-09	116	17	7	24	20	48	rs2217222,rs13018971,rs4417739,rs2419759,rs4401226,rs2900976,rs2419760,rs11126343,rs374659388,rs1947641	33	6
20	6621717	rs1000972	1.72408e-08	276	50	32	143	14	37	rs6140041,rs6054390,rs6038557,rs6054392,rs4813800,rs1321455,rs1321456,rs1321457,rs4142037,rs1407038,rs1407039,rs6054405,rs1884902,rs979012,rs979011,rs2145271,rs2145272,rs2326844,rs6140050,rs2206925,rs4815915	33	6
20	34025983	rs143383	1.83295e-08	731	292	172	105	4	158	.	33	6
3	66338847	rs11128196	1.11839e-08	171	44	24	23	22	58	.	33	6
3	194474219	rs7627816	1.53045e-08	200	39	28	46	17	70	rs4677742,rs4677743	33	6
7	151498679	rs4128399	3.21284e-12	12	1	0	0	2	9	rs34802637,rs4726099,rs56158745,rs4726100,rs62478243	33	6
8	108937146	rs2047197	6.15302e-14	420	8	10	114	75	213	rs1463760,rs10109988,rs150883195,rs2881824,rs4734161,rs13251500,rs58466548,rs4735016,rs622634,rs557606,rs1098815,rs534702,rs593872,rs491126,rs668941,rs624798,rs613502,rs565835,rs796496155,rs594725,8:108949730_TA_T,rs521242,rs609820,rs504380,rs554316,rs688754,rs673812,rs673355,rs505451,rs2453419,rs2453420,rs2047198,rs2047199,rs7819166,rs619863,rs634897,rs514848,rs661291,rs548953,rs549780,rs664001,…	33	6
1	68604094	rs2566785	2.74409e-08	106	19	26	40	9	12	rs983034	34	3
1	47980916	rs6658111	2.98687e-08	305	115	116	58	8	8	rs61784835	34	3
10	104235809	rs7923675	1.87995e-09	549	42	28	24	139	316	rs12570201,rs7342070,rs7341995,rs11591780,rs762458121,rs1984795,rs2015583,10:104227417_CT_C,rs12781718,rs12781742,rs12762305,rs12763794,10:104227791_GA_G,rs11593526,rs11593583,rs11593589,rs35597970,rs41306870,rs2025712,rs2025713,rs766975281,rs11191295,rs7081110,rs7081467,rs3740415,rs3740414,rs11593971,rs11595149,rs1056744,rs12569526,rs5870,rs11598128,rs11598184,rs12771867,10:104246709_AT_A,rs1257…	34	3
11	27473981	rs4542364	3.93458e-10	347	63	38	64	49	133	rs5020127,rs11030009,rs10835180,rs4074516,rs7946359,rs7945211	34	3
11	27744859	rs12273363	1.37889e-08	42	7	2	17	14	2	rs12288512,rs17309930	34	3
12	28221891	rs6487657	3.36937e-11	149	18	3	25	9	94	rs11049310,rs11049312,rs11049315,rs10843080,rs229988,rs7312390,rs6487658,rs6487659,rs11049320,rs1842194,rs1600345,rs11049322,rs7975563,rs11049323,rs10843083,rs10843084,rs10843085,rs10843086,rs10843087,rs75605562,rs7969830,rs11049352,rs10843097,rs11049359,rs11049360,rs7305286,rs11049363,rs7305790,rs11049364	34	3
12	28432808	12:28432808_CTG_C	9.8805e-10	911	218	2	1	7	683	rs11049365,rs11049368,rs10843111,rs16932640,rs7977538,rs1965280,rs1463571,rs10843112,rs147450915,rs61920210,rs2881787,rs4931727,rs4931729,rs4931730,rs11049369,rs11049370,rs11049372,rs12372372,rs11049373,rs7980151,rs10843114,rs11049376,rs10843115,rs2127315,rs35787832,rs7955094,rs7955118,rs7955237,rs11049380,rs7958401,rs764217102,rs17801436,rs17801442,rs2035271,rs11049384,rs11049385,rs11049387,rs60…	34	3
15	58358607	rs4646549	7.03901e-21	328	0	2	2	4	320	rs12441733,rs1372366,rs143833076,rs11071354,rs56191613,rs1550573,rs4143222,rs4143223,rs4143224,rs12148531,rs11071355,rs12148662,rs8035612,rs2028504,rs2028505,rs61443479,rs58829759,rs28647249,rs1441822,rs4080,rs4090,rs7498008,rs12440501,rs1816777,rs1816778,rs1348197,rs8042779,rs8042677,rs28379349,rs7173078,rs8024164,rs4775005,rs1530293,rs143896067,rs920636,rs1550574,rs2218260,rs4775006,15:58216380…	34	3
16	87224855	rs9308342	1.25651e-08	164	5	1	30	32	96	rs9888792,rs111864226,rs9308344,rs4843557,rs7205039,rs12921714,rs12921347,rs12922411,rs4843556,rs7196520,rs7203251,rs6540016,rs7185688,rs11644651,rs7191546,rs6540017,rs8047567	34	3
18	19462040	rs9958048	2.75969e-09	491	62	22	182	92	133	rs35682108,rs3017027,rs2155975,rs779003340,rs3810042,rs12458857,rs1539860,rs4800929,rs14062,rs8093099,rs8089932,rs745889304,rs4401129,rs12964162,rs16960907	34	3
20	11285932	rs6108906	3.0154e-15	520	28	78	23	69	322	rs58875492,rs2024621,rs988788,rs6078118,rs755572121,rs1997877,rs1997876,rs6033092,rs6040515,rs6033095,rs722568,rs6108909,rs6074279,rs6078132,rs112329508,rs17800232,rs6078136,rs1028440,rs6074281,rs13038948,rs13039061,rs34263258,rs6074283,rs6078138,rs6104738,rs11698064,rs6104739,rs6078140,rs1535071,rs1535072,rs144760488,rs13043539,rs6078141,rs2327402,rs28479511,rs28612819,rs60776557,20:11350094_TCA…	34	3
3	98368844	3:98368844_CAA_C	2.38639e-08	275	114	5	107	17	32	rs10804683,rs11927405,rs10935473	34	3
4	7857713	rs28546749	1.34936e-09	528	37	95	172	59	165	rs4619890,rs62289300,rs28605661,rs61742221,rs62289317,rs28377405,rs58273475,rs62289320,rs6838073,rs6816389,rs73210866,rs7378072,rs112937408,rs62289333,rs6814219,rs7680747,rs7660850,rs7683747,rs28437157,rs28600706,rs62289335,rs62289336,rs62289337,rs62289338,rs62289339,rs62289340,rs28622214,rs34033399,rs13130704,rs28694545,rs17770213,rs137979142,rs17770321,rs34310670,rs62290561,rs17832709,rs5622038…	34	3
7	120873078	rs1534016	5.54718e-15	375	47	22	48	30	228	rs11766324,rs2110281,rs2110282,rs2110283,rs2968345,rs6956201,rs12534510,rs6466767,rs6961525,rs1917114,rs1917113,rs798933,rs798934,rs12673968,rs10249736,rs1005400,rs1554635,rs6466769,rs6954757,rs13223036,rs798943,rs566523025,rs2968338,rs1296405,rs12668590,rs13245677,rs798946,rs12673770,rs12706313,rs34320754,rs549829667,rs34249834,rs7801723,rs12706318,rs10953928,rs13232048,rs35758028,rs6947453,rs69…	34	3
7	120907634	rs2691032	1.16588e-11	126	4	2	3	15	102	rs75361007,rs75956426,rs79723118,rs116083706,rs35793694,rs77699599,rs10279122,rs80269068,rs13438127,rs10230310,rs77659599,rs373704952,rs543364349,rs80183787,rs79498775,rs10274324,rs10229198,rs10259598,rs79199805,rs78417395,rs57977421,rs798918,rs798917,rs798915,rs76272871,rs78204988,rs798913,rs118025539,rs139552274,rs798909,rs798908,rs35133254,rs117555994	34	3
7	121033121	rs7776725	2.82927e-10	35	3	1	0	0	31	rs142005327,rs3801387,rs55963900,rs10242100,rs3801383,rs3801382,rs7807953,rs7808155,rs12539772,rs56364616,rs917727,rs917726,rs718766,rs12531355	34	3
1	215139887	rs1452628	2.48293e-54	177	16	7	4	8	142	rs1077323,rs755576,rs1452626,rs1452627,rs6667184,rs12757359,rs1901620,rs1901621,rs10494987,rs17023910,rs12728280,rs6540873,rs2167688,rs562410,rs476557,rs1349673,rs507072,rs1452630,rs10494988,rs4517324,rs487208,rs1582113,rs7531398,rs76553563,rs12123237,rs145492984,rs1890007,rs78300504,rs11120457,rs864736,rs2077982,rs17023977,rs543029,rs76641944,rs1452631,rs495296,rs1452632,rs59084003,rs6681013,rs1…	35	4
1	215185552	rs2601645	6.77466e-34	193	2	0	16	37	138	rs12120334,rs7514200,rs76660218,rs12402694,rs6691805,rs12406318,rs544535,rs12127113,rs12119060,rs12134208,rs2601647,rs1901622,rs2841614,rs6691229,rs1597846,rs1349671,rs748565506,rs112698436,rs199989108,rs1452611,rs965283,rs753718556,rs115948006,rs35551944,rs1597844,rs34437031,rs2841593,rs2841590,rs2841589,rs1156732,1:215206547_CTT_C,rs200361141,rs2841586,rs2841585,rs2841584,rs1452613,rs2841582,rs…	35	4
1	155661719	rs146554560	2.84553e-24	57	0	0	2	4	51	rs41264915,rs35154152,rs67579710,rs72704117,rs11580040,1:155198264_CG_C,rs72704130,rs56894225,rs180921974,rs41314549,rs140959946,rs114760481,rs148015261,rs143612128,rs72704164,rs72704165,rs111652370,rs111360475,rs113671475,rs72704175,rs553470220,rs149253716,rs72704191,rs72704192,rs139932136,rs10908473,rs138522636,rs34172230,rs567387639,rs143582530,rs72706118,rs72706130,rs116237120,rs72706148,rs72…	35	4
1	155126903	rs140676308	5.11435e-21	60	0	0	0	2	58	rs72702209,rs72702251,rs150352963,rs6675468,rs140178960,rs61811916,rs72702268,rs112559323,rs6427137,rs72702269,rs112918389,rs112519377,rs1462854,rs67333363,rs112260947,rs11449003,rs72702273,rs57157364,rs58925616,rs12126992,rs72702285,rs72702288,rs113932675,rs7517158,rs7517162,rs7548383,rs72702293,rs112591935,rs111993576,rs11264324,rs111992949,rs28670060,rs11264325,rs10908457,1:155091121_AAG_A,rs1…	35	4
1	215155191	rs12073570	5.53129e-14	78	11	19	17	3	28	rs17603259,rs11579679,rs17544023,rs17544265,rs17544426,rs12078174,rs12079236,rs72760669,rs115206394,rs56662669,rs17604089,rs74140846,rs11120584,rs12121417,rs2135811,rs55731950,rs56089057	35	4
1	150789961	rs3894771	1.37027e-11	643	23	74	63	15	468	rs3738484,rs3738485,rs9803935,rs4970918,rs12125672,1:150555735_TA_T,rs61820165,rs6698495,rs6697620,rs11204675,rs71086523,rs2048558,rs10888384,rs10888385,rs11204677,rs11204678,rs12139563,rs12746899,rs11204679,rs200369604,rs11204680,rs6669122,rs1971378,rs1053732,rs3754209,rs4970923,rs11204684,rs7524620,rs56868972,rs200656350,rs6587516,rs6678013,rs2175615,rs7538884,rs72700895,rs72700897,rs6661872,rs…	35	4
1	215691268	rs114164928	1.76843e-10	72	62	0	0	0	10	rs12129661	35	4
1	215153990	rs55804545	7.17166e-10	77	1	0	0	1	75	rs61818240,rs61818241,rs542497335,1:215149239_AATTT_A,rs61818243,1:215150986_TA_T,rs61818244,rs61818245,1:215154967_GA_G,rs61818248,rs61818249,rs59259176,rs59365356,rs56042055	35	4
1	156190363	rs72708294	9.58684e-10	8	0	0	3	3	2	.	35	4
1	155214473	rs12034326	5.03916e-09	393	81	5	12	16	279	rs4971085,rs11264337,rs11264338,rs7556304,rs11264339,rs4421576,rs4276914,rs4971088,rs4971089,rs12407919,rs11264343,1:155199690_TA_T,rs12723761,rs3768566,rs4043,rs1045253,rs28595322,rs10796940,rs11264344,rs2009578,rs2075569,rs10908459	35	4
1	93311708	rs11164826	2.99609e-08	672	152	119	328	38	35	rs11164827	35	4
10	17039999	rs7071003	1.4975e-10	214	12	31	23	87	61	rs6602171,rs7900377,rs7900486,rs11597179,rs7084165,rs4082518	35	4
11	130282078	rs2875238	1.53793e-10	67	0	7	14	2	44	rs4937514,rs10894192,rs4937515,rs747250,rs11222084,rs3740888,rs2291344,rs7936928,rs4936099,rs765386,rs2279570,rs1552330,rs6590459,rs76389393	35	4
11	30616569	rs294378	6.72759e-09	33	3	5	9	10	6	.	35	4
11	130457581	rs4937539	1.18705e-08	169	23	0	5	25	116	rs7929936,rs7111149,rs7127536,rs4937541,rs1950118,rs1950117,rs2875270,rs1921581,rs1921579,rs10791082	35	4
12	106476805	rs12146713	1.80018e-22	128	1	17	65	2	43	rs12369969,rs73193824,rs1427793,rs1064959,rs3741884,rs3782690,rs17038091,rs1978730,rs2251027,rs73193841,rs1896364,rs7485023,rs10778458,rs11112866,rs73193855,rs112312971,rs55657928,rs3782692,rs12370774	35	4
13	27680564	rs565707	1.17153e-08	179	28	63	41	15	32	rs12874945	35	4
14	54420647	rs71446481	3.12774e-10	56	0	0	0	22	34	rs7159662,rs66913363,rs2358432,rs11623717,rs12893484,rs12898159,rs2071047,rs2855532,rs2761882,rs2761884,rs2855530,rs2738265,rs762643,rs2761887,rs2032423	35	4
15	85693016	rs2342118	2.98339e-19	738	12	128	173	88	337	rs12439802,rs7173332,rs12900078,rs116893322,rs34585903,rs796672389,rs67613323,rs11629962,rs11629963,rs71397835,rs62022527,rs62022528,rs7359256,rs4980341,rs11439217,rs66550763,rs62021182,rs4980340,rs62021184,rs11629967,rs12903975,rs3862411,rs35000527,rs35816571,15:85567457_TATC_T,rs17611171,rs12908400,rs12912860,15:85573935_CTT_C,rs17611290,rs289390,rs289388,rs12906544,rs439313,rs289382,15:8557893…	35	4
15	71600251	rs11633212	2.88313e-10	305	33	85	61	64	62	rs12906632,rs4777362,rs4777363,rs8038257,rs1568011,rs12917206,rs10851838,rs12901296,rs28398466,rs1606887,rs11631778,rs28529655	35	4
15	81507457	15:81507457_TGTCATTTCA_T	2.64395e-08	235	18	13	20	115	69	rs17337055,rs17337098,rs66933405,rs67601221,rs11631430,rs66709425,rs57173059,rs150752466,15:81497273_TA_T,rs113890265,rs11639206,rs11634864,rs113643882,rs114721012,rs115781366,rs115480823,rs35289965,rs111377212,rs575010033,rs59415196,rs67895155,rs66484136,rs72744134,rs72744136,rs66540250,rs72744137	35	4
16	87226843	rs12921347	1.22776e-31	164	0	1	1	2	160	rs12934042,rs4843223,rs11641115,rs56399712,rs9783773,rs9783786,rs11864957,rs12447701,rs11864791,rs11861940,16:87221841_ATG_A,rs9888792,rs111864226,rs12711472,rs12711473,rs9308341,rs9308342,rs9308343,rs9308344,rs9937293,rs4843227,rs4843560,rs4843226,rs4843559,rs4843558,rs4843557,rs7205039,rs9933149,rs12921714,rs12920553,rs12922411,rs12921170,rs4843556,rs7196520,rs7203251,rs56023709,rs6540016,rs718…	35	4
16	49879988	rs35332951	2.53887e-11	65	6	0	0	3	56	rs73577318,rs73577328,rs34212526,rs73577330,rs12443775,rs16948031,rs34050011,rs73569791,16:49870993_TG_T,rs59965309,rs12446455,rs73569800,rs60972513,rs56953920,rs143348420,rs73571612	35	4
17	55368116	rs11079287	1.96968e-11	143	0	2	26	11	104	rs1815198,rs4239207,rs4239208,rs4341799,rs4794716,rs13353194,rs3803756,rs6503805,rs764418283,rs2332902,rs7501571,rs1534307,rs4794720,rs4794721,rs792400,rs792399,rs792394,rs792388,rs792386,rs792385,rs17821487,rs12949781,rs11868945,rs17221091,rs1975469,rs66533377,rs12325702	35	4
17	25793042	rs60304204	1.76065e-10	290	4	2	27	85	172	rs11080176,rs12602712,rs114378193,rs883127,rs4794910,rs12452983,17:25803815_TG_T,rs8077957,rs77065031,rs10083891,rs17778066,rs2008032,rs1879919,rs2948547,rs2948546,rs2945411,rs1967593,rs2948541,rs2948534,rs2945385	35	4
17	55531642	rs720238	1.92035e-10	56	1	3	9	10	33	rs720237,rs12950125	35	4
17	64024100	17:64024100_GGAAA_G	7.08174e-09	1150	183	80	44	39	804	rs11871960,rs1443310,rs7220446,rs7221503,rs12939715,rs12941733,rs12941750,17:63965952_TATC_T,rs5015873,rs12601064,rs4514707,rs4464118,rs4239075,rs2111409,rs62064322,rs62064323,rs62064324,rs1348378,17:63980305_TA_T,rs4791105,rs10512509,rs9303498,rs12601188,rs9303499,rs9303500,rs770603923,17:63982821_TTATAA_T,rs935141,rs36058067,rs34420119,rs9894275,rs7216574,17:63985363_AAAAAAAG_A,rs7215457,rs6504…	35	4
19	3457058	rs12980469	1.31149e-08	124	11	17	46	24	26	.	35	4
2	190175090	rs114335166	3.0993e-13	628	22	7	12	37	550	rs56674124,rs55881040,2:189888422_GATATATATATATAT_G,rs7419916,rs73981481,rs538494588,rs73981485,rs12886,rs73981487,rs7586,rs78905646,rs56339059,rs73981488,rs73981489,2:189901251_TA_T,rs74787438,rs59291399,rs77183421,rs55749146,rs199978925,rs59631824,rs59397955,rs76890219,rs57047644,rs115735575,rs144317055,rs73978809,rs116298748,rs73978810,rs114959831,rs73978811,rs73978812,rs56063417,2:189926219_C…	35	4
2	56135099	rs78857879	1.47903e-12	294	43	122	60	21	48	2:56116193_TTGATTCTTGGCCTCCCTCCC_T,2:56127099_AT_A,rs7596872,rs4233964,rs3762515,rs113481311,rs146896516	35	4
2	111597991	rs1533295	3.22012e-11	253	19	140	29	15	50	rs1969232,rs1969233,rs999643,rs999642,rs10180446,rs12476878,rs1554006,rs13019266,rs9917154,rs7576541,rs7588925,rs10179923,rs10180020,rs12711785,rs4849134,rs4849135,rs1533300,rs1533298,rs2612698,rs2341873,rs2612700,rs4849155,rs4848317,rs10864930,rs12151764	35	4
22	21078301	rs4361213	9.84975e-21	640	0	138	15	15	472	rs2110412,rs4822429,rs4820558,rs488506,rs490365,rs520698,rs9608279,rs552668,rs499113,rs583208,rs598141,rs565979,rs479275,rs511527,rs542771,22:21031583_GT_G,rs672235,rs491228,rs853148,rs591446,rs637335,rs639715,rs670529,rs9612645,rs515841,rs588329,rs517789,rs853152,rs5751736,rs8136537,rs165817,rs165816,rs140466,rs4052260,rs1042668,rs4315628,rs28538662,rs9608307,rs180814,rs3930342,rs4557089,rs57600…	35	4
3	194472606	rs6777925	2.02714e-18	180	0	5	43	26	106	rs6437412,rs4677737,rs10933668,rs10933669,rs12495984,rs58005101,rs62290988,rs60799707,rs58357770,rs57295137,rs7627816,rs59925255,3:194474334_CG_C,rs57989961,rs35211338,rs59862670,rs4677635,rs34115034,rs4677636,rs4677637,rs4677638,rs4677639,rs4234200,rs4324426,rs4311168,rs4416332,rs4393849,rs4234201,rs4677738,rs61321104,rs58995417,rs58214396,rs62291021,rs4361226,rs4458311,rs4677740,rs4677741,rs109…	35	4
3	73714140	rs1355467	4.57921e-10	428	104	71	75	87	91	rs9829541,rs9834016,rs34103180,rs1022170,rs2036894,rs2036893,rs11128357,rs11710663,3:73709791_AAT_A,rs9850935,rs1858325,rs1858324,rs4677325,rs4677326,rs9310279,rs9819637,rs9843155,3:73711292_AT_A,rs9847694,rs9824294,rs1511522,rs1511521,rs1039956,rs1039955,rs13078725,rs7644807	35	4
3	183342217	rs13100537	1.53415e-08	433	103	5	8	29	288	rs9846437,rs2313447,rs9851774,rs9852101,rs10154857,rs10154858,rs10154974,rs9290764,rs9819295,rs9862564,rs6799350,rs6443899,rs6768172,rs55649975,rs7642806	35	4
3	20311794	rs139297776	3.60125e-08	78	1	4	48	15	10	rs138526983,rs114814627	35	4
5	122725257	rs13174550	3.71071e-27	611	2	98	125	36	350	rs61394003,rs562297143,rs11954944,5:122624476_CT_C,rs2897737,rs4836523,rs4836524,rs7711615,rs12658966,rs72789810,rs2561277,rs687638,rs675443,rs673658,rs4308481,rs4836528,rs13156484,rs35229467,rs1582931,rs11957435,rs1428394,rs9784689,rs12153458,rs1835009,5:122662896_ATTC_A,rs6873020,5:122664075_GTCTT_G,rs34912029,rs111737816,rs112446794,rs112398493,rs7715829,rs7734187,rs11241682,rs2407654,rs688755…	35	4
5	122496931	rs459743	9.1278e-16	173	1	2	80	31	59	rs76996714,rs143396505,rs189190,rs335182,rs189189,rs1644319,rs1685201,rs461100,rs10670773,rs459530,rs466970,rs462210,rs408345,rs58972771,rs335215,rs162953,rs335214,rs335213,rs335212,rs335211,rs463106,rs456467,rs335208,rs335207,rs335206,rs335205,rs162952,rs335204,rs335202,rs335201,rs335200,rs335199,rs163041,rs335176,rs335177,rs179805,rs35404140,rs335194,rs335196,rs335197,rs335198,rs7702622	35	4
5	122609853	rs77097530	1.63337e-09	46	16	21	5	1	3	.	35	4
5	122467316	rs426500	1.59248e-08	280	56	11	66	62	85	rs335145,rs151283,rs335172,rs509256	35	4
5	122627059	rs890930	2.75181e-08	37	6	15	3	2	11	.	35	4
6	35009578	rs2820224	2.10875e-26	390	0	0	96	38	256	rs2064254,rs10947525,rs58737173,rs72894025,rs11758962,rs62402666,rs9469918,rs2985,rs4646944,rs4646940,rs11377156,rs2273006,rs202082381,rs9394252,rs13219624,rs7739991,rs6918872,rs9368836,rs9296139,rs3800451,rs2092428,rs7757211,rs9357188,rs2473613,rs2504162,rs12205331,rs847852,rs1737727,rs847848,rs847847,rs847843,6:34922921_CT_C,rs6932857,rs2293242,rs13191009,rs3823438,rs9784818,rs4432973,rs7759369…	35	4
6	56112343	rs2745367	2.00433e-17	173	14	30	2	0	127	rs12205794,rs141135345,rs9475642,rs1925156,rs7757985,rs11437965,rs3857614,rs3857615,rs9296834,rs6925652,rs6919257,rs59048161,rs6459141,rs6917061,rs557040397,6:56130712_GA_G,rs12208321,rs9475648,rs9475651,rs9475654,rs114983865,rs9464371	35	4
6	169301357	rs10945320	4.18346e-11	313	99	35	37	55	87	rs146554661,rs9355020,rs4708525,rs9346484,rs4708386,rs6928867,rs12207490,rs12194569,rs540529075,rs9346486,rs58357768,rs36031458,6:169300677_AGAG_A,rs34837126,rs6932073	35	4
6	169487071	rs62435795	1.00416e-09	147	30	21	13	14	69	rs62435771,rs62435772,rs62435789,rs10485332,rs62435790,rs62435791,rs62435792,rs73034034,rs62435793,rs17788472,6:169485188_CAGAA_C,rs73034063,rs62435796,rs17184572,rs62435798,rs62435799,rs62435800,rs62435802,rs62435803,rs62435804,rs62435806,rs62434680,rs17184923,rs980777,rs62434682,rs62434683,rs62434684,rs62434685,rs62434686,rs73036152,rs62433594,rs62433595,rs62433597,rs142007912,rs73036168,rs6243…	35	4
6	7833826	rs1358892	3.07043e-09	151	9	3	41	10	88	rs267180,rs2241669,rs72829207,rs72829210,rs267207,rs387786,rs1225923,rs1235192,rs1225924,rs1228633,rs1225933,rs267170,rs1044104,rs41302895,rs1225945,rs1225948	35	4
6	169448286	rs12206807	4.14525e-09	113	29	12	29	17	26	.	35	4
6	149485591	rs9498239	1.07863e-08	387	33	15	56	76	207	6:149406050_TGAG_T,rs9498205,rs9498207,rs6901626,rs6902487,rs6902195,rs9498210,rs1316376,rs6570932,rs776829310,rs148091794,rs35649129,rs4454159,rs2185250,rs1890610,rs7773409,rs1890612,rs10457842,rs1316534,rs1316536,rs9498214,rs7775412,rs7741346,rs7742644,rs7740618,rs13191650,rs6926365,rs4897088,rs758356270	35	4
6	169591678	rs7743597	1.95662e-08	224	52	12	67	9	84	rs1123753,rs4708599,rs35695960,rs9379339,rs9379338,rs9294968,rs9294970,rs12212161,rs12210740,6:169588103_TC_T,rs11760041,rs9505943	35	4
7	2867557	rs3837080	3.74621e-18	350	5	12	35	2	296	rs798565,rs798563,rs798562,rs798560,rs798559,rs798558,rs798557,rs798556,rs34802551,rs798555,rs798554,rs798552,rs798551,rs798550,rs798548,rs798547,7:2761349_CA_C,rs798546,rs798545,7:2762764_AAAG_A,rs798544,rs798543,rs798542,rs798540,rs78018097,rs798538,rs798536,rs798534,rs709282,rs798531,rs798528,rs798526,rs798518,rs798514,rs798513,rs798512,rs798511,rs798510,rs798508,rs798506,rs798503,rs798502,rs7…	35	4
7	151498679	rs4128399	1.61556e-17	12	0	0	0	1	11	rs34802637,rs4726099,rs56158745,rs4726100,rs62478243,rs13224758,rs12703159	35	4
7	102502063	rs12540384	2.19736e-17	558	0	9	115	77	357	rs73406218,rs9641299,rs77490360,rs10464611,rs11974748,rs4489255,rs4361704,rs149805825,rs12672488,rs9691949,rs199970642,rs9718444,rs56356294,rs7800387,7:102433003_AG_A,rs74708264,rs201793827,rs142264290,rs2908412,rs3933460,rs6975388,rs58367848,rs140795860,rs80313245,rs12671557,rs75387186,rs57253646,rs7780981,rs7779121,rs6946773,rs12538955,rs11981980,rs75197737,rs58919995,rs73406250,rs10487283,rs12…	35	4
7	120965464	rs10668066	2.50195e-12	168	11	2	46	40	69	rs10254825,rs2536201,rs2908007,rs3779381,rs2908004,rs142005327,rs2536189,rs3801387,rs55963900,rs2707466,rs10242100,rs2536185,rs3801383,rs2536180,rs2244812,rs2270215,rs2536172,rs3801382,rs552474581,rs7807953,rs7808155,rs12539772,rs2254595,rs56364616,rs917727,rs917726,rs718766,rs12531355,rs7776725	35	4
7	134388240	rs2347697	9.98176e-09	182	30	14	111	15	12	rs34845444,rs4728335,rs4524734,rs10954464,rs11762352,rs2347696,rs2347698,rs6973339,rs6467551,rs6944563	35	4
7	103007599	rs12536983	1.47845e-08	36	2	4	17	7	6	rs12535070	35	4
7	33503388	rs9886232	4.0352e-08	315	37	41	113	69	55	.	35	4
8	121221567	rs921861	1.67734e-09	277	149	17	18	2	91	rs13261812,rs2305598,rs7013781,rs7013555,rs7018328,rs6980799,rs2305600,rs2054148,rs571672550,rs10955961,rs10955962,rs957694,rs957695,rs957696,rs3765062,rs6994973,rs2034841,rs2034842,rs2219246,rs71571669,rs12547117,rs12542144,rs7016695,rs71515981,rs10808508,rs4870722,rs4870723,rs4870724,rs35784860,rs9643142,8:121230499_CTA_C,rs7387373,rs56159702,rs58829748,rs12543412,rs6996780,rs11773991,rs1138531…	35	4
9	114074257	rs57002023	3.92183e-09	452	157	20	137	98	40	rs10980847,rs55873644,rs536683688,rs76180976,rs78998026,rs4978437,rs10980865,rs72607187,rs10817168,rs78371528	35	4
9	139839904	9:139839904_T_G	1.39902e-08	355	60	87	145	11	52	9:139836362_G_A,9:139837990_G_C,9:139838690_T_C,9:139840471_G_T,9:139844953_G_A,9:139848273_A_G,9:139848278_T_C,9:139850675_G_T	35	4
10	21839820	rs11275375	1.36574e-20	381	28	18	52	25	258	rs10159545,rs874149,rs10828246,rs12766229,rs9732777,rs11012722,rs111539184,rs66934412,rs35336290,rs796489086,10:21780780_GA_G,rs5011832,rs12770228,rs35106872,rs12357321,rs11012725,rs11012726,rs12256551,rs946711,10:21807469_GA_G,rs11012730,rs12253527,rs1416901,rs564819152,rs530827289,rs550532200,rs7084454,rs12251016,rs10828248,rs10828249,rs1802669,rs12779865,rs11012732,rs7098100,rs10828250,rs11012…	36	9
11	130282078	rs2875238	6.35706e-12	67	3	12	15	4	33	rs10894192,rs4937515,rs11222084,rs6590455,rs3740888,rs7936928,rs4936098,rs4936099,rs7120276,rs6590459	36	9
12	106476805	rs12146713	5.21538e-19	128	1	16	7	2	102	rs12369969,rs73193824,rs1427793,rs1064959,rs3741884,rs17038091,rs1978730,rs73193841,rs10778458,rs11112866,rs3782692,rs12370774	36	9
12	89787787	rs11105273	3.43639e-08	167	7	11	21	115	13	.	36	9
16	87225101	rs9937293	3.06751e-56	169	0	0	0	0	169	rs55679521,rs13335937,rs12934042,rs4843223,rs11641115,rs66506946,rs11865818,16:87216713_ATGCAGTATATGGC_A,rs9922143,rs56399712,rs9783773,rs11863620,rs9783786,rs62042578,rs11864957,rs12447701,rs11864791,rs11861940,rs11861033,16:87221841_ATG_A,rs9888792,rs111864226,rs12711472,rs12711473,rs9308341,rs9308342,rs9308343,rs9308344,rs4843227,rs4843560,rs4843226,rs4843559,rs4843558,rs4843557,rs7205039,rs99…	36	9
16	87357985	rs72804073	6.3091e-16	153	13	44	39	36	21	rs9940109,rs112604269,rs79020028	36	9
16	87362002	rs2278272	2.08344e-11	43	2	3	8	3	27	rs4843581,rs28625347,rs28680300,rs60212280,rs2278270,rs2278271,rs74038725,rs17771103,rs79224744,rs2288482,rs2318446,rs57204345,rs75007427,rs78650436,rs11648756	36	9
16	87177837	rs4843536	1.50382e-09	5	0	1	0	0	4	.	36	9
16	87216477	rs12445186	6.22229e-09	5	1	1	1	0	2	rs12444606	36	9
16	87221430	rs553825427	2.80023e-08	136	53	7	4	8	64	.	36	9
16	87202096	rs10863181	4.66351e-08	12	3	0	2	2	5	.	36	9
20	38542569	rs17803745	3.53014e-10	199	15	21	58	64	41	rs6065171,rs12480662,rs6028718,rs2224538,rs2224539,rs11481519,rs56371715,rs2145943,rs6129447,rs932641,rs927376,rs2870132	36	9
22	21166128	rs165689	8.75037e-10	630	81	6	143	42	358	rs4822429,rs165817,rs140466,rs5760087,rs853295,rs4820573,rs5751786,rs6004026,rs1807692,rs5760196,rs5760197,rs13054456,rs4361213,rs9608348,rs5751802,rs11462205,rs5760217,rs3852979,rs2002524,rs2002525,rs6004106,rs2010990,rs1558656,22:21094745_TA_T,rs5760287,rs6004122,rs201073843,rs2241138,rs738058,rs6004133,rs2072516,rs2329583,rs5751855,rs2192802,rs738059,rs1807531,rs1807532,rs1807533,rs738063,rs60…	36	9
4	41313388	rs1453045	4.31215e-08	274	72	33	3	18	148	rs1947386,rs4574448	36	9
5	122757718	rs11953651	7.77224e-12	634	243	77	40	62	212	rs4308481,rs4836528,rs13156484,rs1582931,5:122677607_TGAG_T,rs12520233,rs1047440,rs2303719,rs1366333,rs1366334,rs7725869,rs6595438,rs6891155,rs4836532,rs4836533,rs2115172,rs2115173,rs748649855,rs7735212,rs147130959,rs5871040,rs569694187,rs28891214,rs75434608,rs11241689,rs762042055,rs34984032,rs1428384,rs1428383,rs1428382,rs1428381,rs4836003,rs11241690,rs397743989,rs890928,rs3064335,rs934110,rs100…	36	9
6	151023605	rs552091835	1.12953e-09	131	11	34	37	17	32	rs275350,rs6940540,rs28431130,6:151019732_TAA_T,rs12202497,rs12206172,rs12192990,rs6916149,rs62434144	36	9
6	56107265	rs1925156	1.47739e-08	168	32	48	38	33	17	rs12205794,rs141135345,rs9475642,rs7757985,rs11437965,rs3857614,rs3857615,rs2745367	36	9
7	2791033	rs529794364	1.65639e-16	360	28	12	20	57	243	rs798565,rs798563,rs798562,rs798561,rs798560,rs798559,rs798558,rs798557,rs798556,rs34802551,rs798555,rs798554,rs798552,rs798551,rs798550,rs798548,rs798547,7:2761349_CA_C,rs798546,rs798545,7:2762764_AAAG_A,rs798544,rs798540,rs78018097,rs798536,rs798528,rs798526,rs798518,rs798514,rs798511,rs798510,rs798508,rs798506,rs798502,rs798500,rs798498,rs798497,rs798496,rs798495,rs798494,rs798493,rs208346,rs7…	36	9
8	108394765	rs5893855	9.31725e-11	267	18	77	54	59	59	rs1654723,rs1654724,rs1654725,rs1632354,rs1631690,rs1631592,rs1654726,rs1672157,rs1654727,rs1654728,rs1433179,rs1433180,rs1433181,rs1654730,rs1672148,rs1433183,8:108396678_CA_C,rs1283707,rs1315400,8:108400015_GT_G,rs145837699,8:108400660_AAAAT_A,rs1283706,rs1283705,rs1283669,rs1283665,rs1283691,rs1283690,rs1283689,rs1283688,rs919823,rs1283686,rs919822,rs5893860	36	9
1	215139887	rs1452628	7.28107e-21	177	25	13	8	14	117	rs755576,rs6540873,rs562410,rs476557,rs507072,rs10494988,rs487208,rs7531398,rs76553563,rs12123237,rs145492984,rs1890007,rs78300504,rs864736,rs17023977,rs543029,rs76641944,rs495296,rs1452632,rs59084003,rs6681013,rs12403837,rs12123258,rs58723789	37	6
1	180905694	rs3795503	1.81453e-12	96	51	10	21	2	12	rs1609829	37	6
1	215153367	rs12402694	1.86452e-11	171	23	44	7	20	77	rs12120334,rs7514200,rs76660218,rs6691805,rs12406318,rs12134208,rs2601647,rs2601645,rs6691229,rs1349671,rs112698436,rs965283,rs1597844,rs75277616	37	6
1	155198264	1:155198264_CG_C	3.66999e-09	138	3	9	36	22	68	rs35154152,rs67579710,rs11580040	37	6
[truncated: 25,874 more rows]

## Sheet: Table 6-GSEA
Category	Term	Count	%	PValue	Genes	List Total	Pop Hits	Pop Total	Fold Enrichment	Bonferroni	Benjamini	FDR
[truncated: 33 more rows]

## Sheet: Table 7-MR
id.exposure	id.outcome	outcome	exposure	method	nsnp	b	se	pval	lo_ci	up_ci	or	or_lci95	or_uci95	pheno_exposure	pheno_outcome	egger_intercept	pleiotropy_p
[truncated: 1,414 more rows]
